# Supplementary material for: High-throughput Raman-activated cell sorting of microalgal genome-wide edited library revealed a new regulatory pathway for carotenoid synthesis
Source: Research Square preprint supplement (doi:10.21203/rs.3.rs-7026720/v1), 2025-07-29
Supplement: Supplementary file 1 [file 33c2d18c4d94b03e57b5b38a.xlsx]

## Sheet: Sheet1
Pool	Plate	Mutants in the position of the mutat library	Gene number	gRNA	Annotation	Mutation site in the genome	Wild type sequence	Mutation	The occurrence frequency in the sequencing genome	Sequencing depth	Types of coding region variations
01 Pool	01	01 Pool_01 plate_01 well	NO19G00460	TGTGTGGTCTTAGATAGAGG	Heat shock protein DnaJ, cysteine-rich domain protein	chr19: 175525	TCCACCTCTATCTAAGACCACACA	T,TCCACCTATCTAAGACCACACA	AO=1,2	DP=103	frameshift_variant
01 Pool	01	01 Pool_01 plate_01 well	NO21G01990	CACGCCCAGCACGTACACAA	Unknown protein	chr21: 580551	C	CA	AO=7	DP=151	frameshift_variant
01 Pool	01	01 Pool_01 plate_03 well	NO01G05120	GTAAAGACAGACGAGCCCAA	Small ubiquitin-like modifier	chr1: 1362200	GC	G	AO=7	DP=130	frameshift_variant
01 Pool	01	01 Pool_01 plate_03 well	NO19G00460	TGTGTGGTCTTAGATAGAGG	Heat shock protein DnaJ, cysteine-rich domain protein	chr19: 175525	TCCACCTCTATCTAAGACCACACA	T,TCCACCTATCTAAGACCACACA	AO=1,2	DP=103	frameshift_variant
01 Pool	01	01 Pool_01 plate_04 well	NO21G01990	CACGCCCAGCACGTACACAA	Unknown protein	chr21: 580551	C	CA	AO=7	DP=151	frameshift_variant
01 Pool	01	01 Pool_01 plate_05 well	NO15G02380	GGAAGACAAAATCCACAAGG	Triglyceride lipase	chr15: 661130	C	CA	AO=1	DP=190	frameshift_variant
01 Pool	01	01 Pool_01 plate_05 well	NO27G01840	TCGATTCGGCGTATGTCACA	Unknown protein;Unknown protein;Unknown protein;Unknown protein	chr27: 620881	T	TA	AO=3	DP=126	frameshift_variant
01 Pool	01	01 Pool_01 plate_06 well	NO03G03790	TGGATTCACCAAGAAACCAA	Membrane protein	chr3: 1115956	TG	T,TT	AO=8,1	DP=193	frameshift_variant
01 Pool	01	01 Pool_01 plate_07 well	NO19G00460	TGTGTGGTCTTAGATAGAGG	Heat shock protein DnaJ, cysteine-rich domain protein	chr19: 175525	TCCACCTCTATCTAAGACCACACA	T,TCCACCTATCTAAGACCACACA	AO=1,2	DP=103	frameshift_variant
01 Pool	01	01 Pool_01 plate_08 well	NO19G00460	TGTGTGGTCTTAGATAGAGG	Heat shock protein DnaJ, cysteine-rich domain protein	chr19: 175525	TCCACCTCTATCTAAGACCACACA	T,TCCACCTATCTAAGACCACACA	AO=1,2	DP=103	frameshift_variant
01 Pool	01	01 Pool_01 plate_09 well	NO03G04970	ACTAAAGATGGGAATGACTG	Unknown protein	chr3: 1414367	GA	G	AO=7	DP=192	frameshift_variant
01 Pool	01	01 Pool_01 plate_10 well	NO14G00410	CGACATTATACTGCACGAGG	Endonuclease exonuclease phosphatase	chr14: 166025	CGCCTCG	GCCTCT,CGCG,CGCCCG,CGCCTG	AO=1,1,1,1	DP=192	frameshift_variant&missense_variant
01 Pool	01	01 Pool_01 plate_10 well	NO19G00460	TGTGTGGTCTTAGATAGAGG	Heat shock protein DnaJ, cysteine-rich domain protein	chr19: 175525	TCCACCTCTATCTAAGACCACACA	T,TCCACCTATCTAAGACCACACA	AO=1,2	DP=103	frameshift_variant
01 Pool	01	01 Pool_01 plate_12 well	NO14G00410	CGACATTATACTGCACGAGG	Endonuclease exonuclease phosphatase	chr14: 166025	CGCCTCG	GCCTCT,CGCG,CGCCCG,CGCCTG	AO=1,1,1,1	DP=192	frameshift_variant&missense_variant
01 Pool	01	01 Pool_01 plate_13 well	NO03G03790	TGGATTCACCAAGAAACCAA	Membrane protein	chr3: 1115956	TG	T,TT	AO=8,1	DP=193	frameshift_variant
01 Pool	01	01 Pool_01 plate_14 well	NO01G01340	GGATTCTCCCAACGTTCCAG	3-oxoacyl-(Acyl-carrier-protein) reductase	chr1: 341710	TC	T	AO=3	DP=185	frameshift_variant
01 Pool	01	01 Pool_01 plate_15 well	NO13G00830	TAGTTTCGTCGTGAGCGTAG	Ankyrin unc44;Ankyrin unc44	chr13: 275321	AC	A	AO=4	DP=184	frameshift_variant
01 Pool	01	01 Pool_01 plate_16 well	NO09G01910	GTCCTCTTTGCTGTGCGTCG	Unknown protein	chr9: 594361	GCGT	G	AO=3	DP=233	disruptive_inframe_deletion
01 Pool	01	01 Pool_01 plate_17 well	NO04G03440	GGTCAGCGCATGTCGAACCA	Glycoprotease m22 family protein	chr4: 945763	G	GC	AO=1	DP=202	frameshift_variant
01 Pool	01	01 Pool_01 plate_18 well	NO02G05800	ACTGCACCAAGACAGCCCCG	Unknown protein	chr2: 1549944	GGG	GT,GG,G	AO=1,2,1	DP=161	frameshift_variant
01 Pool	01	01 Pool_01 plate_18 well	NO14G00770	TCCCACCAGCACCATCACAG	Myb family transcription factor	chr14: 276321	CGCTGTGATGGT	C,CGCTGATGATGGT,CGCTGTGAGGGT	AO=1,1,1	DP=160	frameshift_variant
01 Pool	01	01 Pool_01 plate_19 well	NO24G02290	TGTGTTGTGATGTGGTCGTG	Chlorophyll a-b binding protein 1B-21, chloroplastic	chr24: 612287	GGTC	G,GGT	AO=2,7	DP=186	frameshift_variant
01 Pool	01	01 Pool_01 plate_20 well	NO17G01420	GACTTTCACCCAGACCAGGG	Ubiquitin carboxyl-terminal hydrolase 21	chr17: 432271	A	AA,AAA,AC	AO=2,1,1	DP=173	frameshift_variant
01 Pool	01	01 Pool_01 plate_21 well	NO19G01720	CATGTGCGGAGAGATGGTCA	Camp responsive element modulator;Camp responsive element modulator;Camp responsive element modulator	chr19: 520696	GT	C	AO=5	DP=185	frameshift_variant&stop_lost&missense_variant
01 Pool	01	01 Pool_01 plate_22 well	NO10G01170	TGGATGGGAAACAAGCCCGG	Diacylglycerol cholinephosphotransferase	chr10: 349132	CGG	C	AO=1	DP=183	frameshift_variant
01 Pool	01	01 Pool_01 plate_23 well	NO03G04970	ACTAAAGATGGGAATGACTG	Unknown protein	chr3: 1414367	GA	G	AO=7	DP=192	frameshift_variant
01 Pool	01	01 Pool_01 plate_24 well	NO03G03790	TGGATTCACCAAGAAACCAA	Membrane protein	chr3: 1115956	TG	T,TT	AO=8,1	DP=193	frameshift_variant
01 Pool	02	01 Pool_02 plate_01 well	NO04G00580	ACGGACGCGTTTTCGCAAGG	Unknown protein	chr4: 204811	CT	T,C,CTC	AO=4,2,1	DP=152	frameshift_variant
01 Pool	02	01 Pool_02 plate_03 well	NO02G05970	GAGAGTCAAAACGACGCTCA	splicing factor-related;splicing factor-related	chr2: 1596110	A	C	AO=2	DP=50	missense_variant
01 Pool	02	01 Pool_02 plate_04 well	NO08G01580	TCCGTTCACTGCCAACACGA	Unknown protein	chr8: 498197	G	GT	AO=8	DP=167	frameshift_variant
01 Pool	02	01 Pool_02 plate_06 well	NO18G01690	AGGACGAGAAGCAGATCCTG	Unknown protein	chr18: 539508	AG	A,AGG	AO=18,1	DP=159	frameshift_variant
01 Pool	02	01 Pool_02 plate_07 well	NO05G01840	GCTGAGGCCAATTACTACCG	Atp-binding cassette superfamily;Atp-binding cassette superfamily	chr5: 503533	CTA	C,CTAT	AO=1,1	DP=152	frameshift_variant
01 Pool	02	01 Pool_02 plate_08 well	NO05G05080	GGAGTGCAGCTCATTGTGTG	Unknown protein	chr5: 1326552	TTG	T	AO=2	DP=123	frameshift_variant
01 Pool	02	01 Pool_02 plate_10 well	NO29G01260	CATGGCGCCCAGGAGCCAAG	Solute carrier family 35 member b1	chr29: 404050	TG	T,TTG	AO=1,1	DP=131	frameshift_variant
01 Pool	02	01 Pool_02 plate_11 well	NO13G00640	GGCGCTGCGAGAGAATGCGA	Unknown protein	chr13: 218200	TG	T	AO=1	DP=134	frameshift_variant
01 Pool	02	01 Pool_02 plate_12 well	NO02G02200	ACTGCGCGGCATTGTCCCCG	Unknown protein	chr2: 619003	CGG	CG,C	AO=3,3	DP=184	frameshift_variant
01 Pool	02	01 Pool_02 plate_16 well	NO16G00320	GAGTCAAGGTAGGGAAAATG	Serine/threonine protein kinase	chr16: 119300	AT	A	AO=1	DP=118	frameshift_variant
01 Pool	02	01 Pool_02 plate_17 well	NO14G02580	CAGCTTTTGGTACATCACAT	Globin domain protein	chr14: 772472	G	GA	AO=6	DP=168	frameshift_variant
01 Pool	02	01 Pool_02 plate_18 well	NO10G01760	CTTGACATCCCAGACCTACG	cGMP-dependent protein kinase, putative	chr10: 490917	AG	A	AO=7	DP=178	frameshift_variant
01 Pool	02	01 Pool_02 plate_20 well	NO20G00170	AGTCTGAGTACGATCGACCG	Pectin acetylesterase 8;Pectin acetylesterase 5	chr20: 65495	G	GA	AO=5	DP=154	frameshift_variant
01 Pool	02	01 Pool_02 plate_23 well	NO01G01800	TTGTACGAATGCTATCAAGG	Unknown protein	chr1: 455938	AAGG	A,ATAGG	AO=1,5	DP=128	frameshift_variant
01 Pool	03	01 Pool_03 plate_01 well	NO03G05130	AATGCCGGGTATGTACGATG	16s rrna methyltransferase	chr3: 1451101	TGTAC	T,TGTACG	AO=2,1	DP=108	frameshift_variant
01 Pool	03	01 Pool_03 plate_03 well	NO27G00950	GCACATCGTAGACGACAACG	Calmodulin	chr27: 320857	CGTTG	TG,CGTG,CGT	AO=1,4,2	DP=179	frameshift_variant
01 Pool	03	01 Pool_03 plate_04 well	NO14G02820	TAGCACCGTGGATTCAACGA	Galactose oxidase/kelch, beta-propeller	chr14: 838287	C	CC,A	AO=1,1	DP=163	frameshift_variant
01 Pool	03	01 Pool_03 plate_05 well	NO15G02710	CCCCCGATTAGGATGATGGG	Alpha beta hydrolase fold protein	chr15: 744383	TAGGATGA	TAGGATGTT,TAGGATGTTT,T,TAGGAT,TAGGATG	AO=1,1,1,3,1	DP=169	frameshift_variant
01 Pool	03	01 Pool_03 plate_07 well	NO27G00950	GCACATCGTAGACGACAACG	Calmodulin	chr27: 320857	CGTTG	TG,CGTG,CGT	AO=1,4,2	DP=179	frameshift_variant
01 Pool	03	01 Pool_03 plate_11 well	NO05G02120	CTTGCAGGAAGCTCAGATGC	Threonine synthase	chr5: 572018	A	AG,AT	AO=1,3	DP=76	frameshift_variant
01 Pool	03	01 Pool_03 plate_17 well	NO04G01880	CCTGCTGCTCATCTACACCG	Impact-like protein	chr4: 546790	A	AA,AT	AO=2,4	DP=193	frameshift_variant
01 Pool	03	01 Pool_03 plate_18 well	NO13G01110	CTTTACCTCTTGTGTCGCTG	Unknown protein	chr13: 348974	G	GT	AO=1	DP=169	frameshift_variant
01 Pool	03	01 Pool_03 plate_20 well	NO06G04160	GCGACCCAAATCAGGCAGGA	Wd sam and u-box domain-containing protein 1	chr6: 1161164	CT	C	AO=1	DP=148	frameshift_variant
01 Pool	04	01 Pool_04 plate_05 well	NO12G03250	GGTGCAACGTATCCGCGACG	Resistance to phytophthora 1 protein	chr12: 898657	G	GT	AO=1	DP=148	frameshift_variant
01 Pool	04	01 Pool_04 plate_09 well	NO01G04840	GTACCAGCGATCCCCCAACA	Beta-glucan-binding protein	chr1: 1280547	GTGT	TTGTT,GTGTT,GTGTG	AO=1,2,1	DP=77	frameshift_variant&missense_variant
01 Pool	04	01 Pool_04 plate_19 well	NO03G03060	AGTACGCGTTCACGGGCACA	Guanine deaminase	chr3: 916944	GCA	G	AO=1	DP=101	frameshift_variant
01 Pool	04	01 Pool_04 plate_21 well	NO02G05860	GGTGGACACTGATGCTGCCA	Unknown protein	chr2: 1565184	GC	G	AO=2	DP=152	frameshift_variant
01 Pool	05	01 Pool_05 plate_05 well	NO15G01250	TCGTAAAGAGAATCACACAA	Adenosine trna methylthiotransferase	chr15: 353818	G	GAG,GT	AO=1,1	DP=127	frameshift_variant
01 Pool	05	01 Pool_05 plate_07 well	NO05G00230	GCTCTCGCTCAAGACCAAGG	Pleckstrin-like protein	chr5: 99935	CA	C,CAC	AO=1,4	DP=103	frameshift_variant
01 Pool	05	01 Pool_05 plate_10 well	NO14G00410	CGACATTATACTGCACGAGG	Endonuclease exonuclease phosphatase	chr14: 166029	TC	T,TTC	AO=3,1	DP=124	frameshift_variant
01 Pool	05	01 Pool_05 plate_10 well	NO21G02510	AAGAGCAGACGTGGACACAG	Transducin/WD40 repeat-like superfamily protein	chr21: 766217	AC	A	AO=4	DP=69	frameshift_variant
01 Pool	05	01 Pool_05 plate_12 well	NO14G00410	CGACATTATACTGCACGAGG	Endonuclease exonuclease phosphatase	chr14: 166029	TC	T,TTC	AO=3,1	DP=124	frameshift_variant
01 Pool	05	01 Pool_05 plate_14 well	NO16G00210	TGAATGTTACGGTCTACGAG	Salicylate hydroxylase;Salicylate hydroxylase	chr16: 83582	A	AC	AO=4	DP=95	frameshift_variant
01 Pool	05	01 Pool_05 plate_21 well	NO02G05260	GTGCCGTTGATGAGATGGTG	Unknown protein	chr2: 1405634	AGAT	A	AO=1	DP=131	disruptive_inframe_deletion
01 Pool	05	01 Pool_05 plate_22 well	NO06G00140	CAAAAGAAAACTCGACCCGG	Deoxyribodipyrimidine photolyase/cryptochrome;Deoxyribodipyrimidine photolyase/cryptochrome	chr6: 62248	C	CT	AO=2	DP=65	frameshift_variant
01 Pool	06	01 Pool_06 plate_02 well	NO05G02490	TACTCCGGATAACGACGACG	Protein kinase, catalytic domain protein	chr5: 663603	T	TC	AO=1	DP=169	frameshift_variant
01 Pool	06	01 Pool_06 plate_05 well	NO14G00720	AAGCAATTTACGGGCCGTGG	Protein yippee-like;Protein yippee-like	chr14: 258032	G	GT	AO=2	DP=172	frameshift_variant
01 Pool	06	01 Pool_06 plate_07 well	NO07G01830	CATCTCGTCTCCTTGCAACG	Hnrnp arginine n-methyltransferase	chr7: 544816	GT	G,GTTC,GC	AO=1,1,1	DP=158	frameshift_variant
01 Pool	06	01 Pool_06 plate_08 well	NO25G01090	TGTATATCGTGCAAGCATGG	Molybdenum cofactor sulfurase	chr25: 299114	A	AG,AT	AO=4,7	DP=195	frameshift_variant
01 Pool	06	01 Pool_06 plate_10 well	NO06G02750	AATGAAGAGGGAGATATCCG	DHHC-type zinc finger family protein	chr6: 777133	GAT	G	AO=2	DP=149	frameshift_variant
01 Pool	06	01 Pool_06 plate_16 well	NO10G03090	TTTTACCACGGTGTTCACGG	Kazal-type serine protease inhibitor domain protein	chr10: 857804	TTTACCACGGTGTTCACGG	GGGACCG,TTTACCA	AO=1,2	DP=149	missense_variant&conservative_inframe_deletion
01 Pool	07	01 Pool_07 plate_02 well	NO01G00330	CCCGCGAGATGAACTCCAAG	Unknown protein	chr1: 69148	TC	T	AO=1	DP=59	frameshift_variant
01 Pool	07	01 Pool_07 plate_02 well	NO20G02350	CCACAAGGCAAATTAAACCA	non-photochemical quenching 1	chr20: 707434	TA	T,TAA	AO=1,1	DP=157	frameshift_variant
01 Pool	07	01 Pool_07 plate_05 well	NO18G02540	CAGCACTCGAGAAACGAAGG	Unknown protein	chr18: 829614	C	CT	AO=1	DP=152	frameshift_variant
01 Pool	07	01 Pool_07 plate_07 well	NO26G00350	CGACACGCTTAGCACCCTCG	alpha/beta-Hydrolases superfamily protein;alpha/beta-Hydrolases superfamily protein	chr26: 107612	CC	C,CCC,CCT	AO=2,3,1	DP=163	frameshift_variant
01 Pool	07	01 Pool_07 plate_08 well	NO27G00210	CGCGAGAAGTGGGAGTGGTG	Unknown protein	chr27: 73848	AGT	A	AO=13	DP=136	frameshift_variant
01 Pool	07	01 Pool_07 plate_10 well	NO20G02350	CCACAAGGCAAATTAAACCA	non-photochemical quenching 1	chr20: 707434	TA	T,TAA	AO=1,1	DP=157	frameshift_variant
01 Pool	07	01 Pool_07 plate_11 well	NO20G00770	CACCTCAATAAAGAGGGCAC	Vacuolar protein sorting-associated protein 45	chr20: 259625	GCA	ACG,GCG	AO=2,1	DP=137	missense_variant
01 Pool	07	01 Pool_07 plate_12 well	NO08G00630	GCATGTCAAAGGAAGCTGCG	Methionine aminopeptidase	chr8: 224101	AGC	G,AGCT	AO=3,2	DP=167	frameshift_variant&synonymous_variant
01 Pool	07	01 Pool_07 plate_14 well	NO27G00210	CGCGAGAAGTGGGAGTGGTG	Unknown protein	chr27: 73848	AGT	A	AO=13	DP=136	frameshift_variant
01 Pool	07	01 Pool_07 plate_17 well	NO02G00080	ATCGACCTGGTGAATGACGA	Unknown protein	chr2: 20799	GTCA	G	AO=2	DP=94	disruptive_inframe_deletion
01 Pool	07	01 Pool_07 plate_19 well	NO25G00240	GACCATGGCAGATTACACAG	alpha/beta-Hydrolases superfamily protein;alpha/beta-Hydrolases superfamily protein;alpha/beta-Hydrolases superfamily protein	chr25: 64974	G	GT	AO=4	DP=63	frameshift_variant
01 Pool	07	01 Pool_07 plate_22 well	NO30G00120	TTCTAAGTGACCGTAAGCCA	Unknown protein;Unknown protein	chr30: 59904	AG	A,AA	AO=6,1	DP=182	frameshift_variant
01 Pool	08	01 Pool_08 plate_03 well	NO04G04440	ACGAGCACCAGCATAACGTA	Unknown protein	chr4: 1206574	GTT	G,GGTT	AO=2,7	DP=163	frameshift_variant
01 Pool	08	01 Pool_08 plate_07 well	NO14G00160	CCCTTGAACCCGACACACGG	U4 u6 small nuclear ribonucleoprotein prp3;U4 u6 small nuclear ribonucleoprotein prp3	chr14: 58345	GAC	G	AO=1	DP=88	frameshift_variant
01 Pool	08	01 Pool_08 plate_09 well	NO01G04210	CATATACCTGACCGACCCGG	Hsp90 chloroplast targeted	chr1: 1126601	C	CT	AO=1	DP=150	frameshift_variant
01 Pool	08	01 Pool_08 plate_21 well	NO10G02820	TAGGCCGGTTCCGATCACGG	Protein kinase	chr10: 776744	A	AA,AT	AO=9,1	DP=175	frameshift_variant
01 Pool	09	01 Pool_09 plate_11 well	NO16G02710	CATCTTTTGGTGTCCCAGGG	Peptidyl-prolyl cis-trans isomerase	chr16: 781062	A	AA,AG	AO=2,1	DP=195	frameshift_variant
01 Pool	09	01 Pool_09 plate_19 well	NO16G03180	AGAAAAGTGTCGTCTCCTGG	Unknown protein	chr16: 956566	TG	CTG,TT	AO=6,1	DP=85	frameshift_variant
01 Pool	09	01 Pool_09 plate_21 well	NO01G02360	CCTCCTCCTATACTGCAGAG	Poly rna polymerase	chr1: 611655	AG	A,AAG	AO=1,2	DP=162	frameshift_variant
01 Pool	10	01 Pool_10 plate_01 well	NO03G03060	AGTACGCGTTCACGGGCACA	Guanine deaminase	chr3: 916945	C	CAA,A	AO=2,1	DP=91	frameshift_variant
01 Pool	10	01 Pool_10 plate_02 well	NO10G02670	AGTGTGCAAACGTATCCTTG	Unknown protein	chr10: 731750	TC	T,TCC	AO=6,2	DP=158	frameshift_variant
01 Pool	10	01 Pool_10 plate_03 well	NO07G02880	GCTCTGCGCCACCACTCACA	Diphthine synthase	chr7: 815236	TGTGA	T,TGT	AO=1,3	DP=152	frameshift_variant
01 Pool	10	01 Pool_10 plate_04 well	NO14G00540	TCGACACGTTGGCAGCAATG	ferric reduction oxidase 2	chr14: 217232	GGCAGCAATGGGGTAG	G,GGCA,GGCAGCATGGGGTAG	AO=2,1,1	DP=119	frameshift_variant
01 Pool	10	01 Pool_10 plate_06 well	NO01G00620	CACACCTTTCGAGAGCGGCA	Unknown protein	chr1: 163742	C	CG	AO=4	DP=158	frameshift_variant
01 Pool	10	01 Pool_10 plate_07 well	NO11G03050	GTGAAGGAGAGATTCCCCGT	Ankyrin repeat family protein	chr11: 957327	GAAT	AAT,GACT,GAAC	AO=9,1,1	DP=168	frameshift_variant
01 Pool	10	01 Pool_10 plate_08 well	NO18G00180	CCACGAGTATAAATTGAAGG	Unknown protein	chr18: 70360	A	AC	AO=2	DP=178	frameshift_variant
01 Pool	10	01 Pool_10 plate_09 well	NO17G02370	CACTGCTTCGTAAATCCTGG	Nmra-like family domain-containing protein 1;Nmra-like family domain-containing protein 1	chr17: 699818	AAATCC	TAATAC,AAATCCC,AAATCCT	AO=1,1,1	DP=199	frameshift_variant
01 Pool	10	01 Pool_10 plate_10 well	NO18G00180	CCACGAGTATAAATTGAAGG	Unknown protein	chr18: 70360	A	AC	AO=2	DP=178	frameshift_variant
01 Pool	10	01 Pool_10 plate_11 well	NO03G04520	ATAAGCTGGAGAGTTCACAG	Nuclear control of ATP synthase 2	chr3: 1297623	TCA	T,TCAA	AO=1,2	DP=148	frameshift_variant
01 Pool	10	01 Pool_10 plate_12 well	NO17G02520	AAAAGAGAAGCTCATCGTAG	Lipase class 3	chr17: 742293	A	AG	AO=1	DP=181	frameshift_variant
01 Pool	10	01 Pool_10 plate_15 well	NO07G02730	GTCGTCATCCGGTACCAGCG	Frataxin-like protein;Frataxin-like protein	chr7: 784886	A	AG	AO=1	DP=172	frameshift_variant
01 Pool	10	01 Pool_10 plate_19 well	NO03G03060	AGTACGCGTTCACGGGCACA	Guanine deaminase	chr3: 916945	C	CAA,A	AO=2,1	DP=91	frameshift_variant
01 Pool	10	01 Pool_10 plate_20 well	NO03G01060	AAGCGCATAAGTGATTGTTG	Unknown protein	chr3: 333843	AGCGCTTCGGGCGGGACTGAGTCCTGCACAATCTGCCGCAACAATCACTTAT	A,AGCGCTTCGGGCGGGACTGAGTCCTGCACAATCACTTAT,AGCGCTTCGGGCGGGACTGAGTCCTGCACAATCTGCCGCAATCACTTAT	AO=1,2,2	DP=98	frameshift_variant
01 Pool	10	01 Pool_10 plate_22 well	NO06G02140	CGATGGACAGAGGAGCGCAG	Unknown protein	chr6: 623804	G	GA	AO=7	DP=151	frameshift_variant
01 Pool	10	01 Pool_10 plate_23 well	NO06G01100	GCGCATCAACAAAATCACGG	Cystathionine beta-synthase	chr6: 353208	A	AT	AO=2	DP=156	frameshift_variant
01 Pool	11	01 Pool_11 plate_02 well	NO21G00970	CACCAAAATGAACGTATACG	Amino acid transporter, transmembrane	chr21: 312235	T	TC	AO=12	DP=148	frameshift_variant
01 Pool	11	01 Pool_11 plate_07 well	NO10G03660	GTCAACGATTGGGAACGTGG	Unknown protein	chr10: 1055779	CG	C,CGG,CGT	AO=1,3,1	DP=157	frameshift_variant
01 Pool	11	01 Pool_11 plate_10 well	NO03G04820	GTTTCCATCACCACCACCGG	Chloride channel protein	chr3: 1372617	CG	C	AO=2	DP=196	frameshift_variant
01 Pool	11	01 Pool_11 plate_11 well	NO22G01530	GGGACCCAACAAGCAACGAG	Glycerophosphoryl diester phosphodiesterase	chr22: 450021	GCAAC	G	AO=1	DP=180	frameshift_variant
01 Pool	11	01 Pool_11 plate_11 well	NO02G01740	TCTGCCCCTCGCATGTCCCG	Light-harvesting protein	chr2: 510929	GGA	GA,G	AO=8,3	DP=206	frameshift_variant
01 Pool	11	01 Pool_11 plate_12 well	NO10G03660	GTCAACGATTGGGAACGTGG	Unknown protein	chr10: 1055779	CG	C,CGG,CGT	AO=1,3,1	DP=157	frameshift_variant
01 Pool	11	01 Pool_11 plate_13 well	NO05G04280	GATCATCGGGCACATCCAAG	Nad-dependent epimerase dehydratase	chr5: 1101033	TTGGA	T	AO=2	DP=171	frameshift_variant
01 Pool	11	01 Pool_11 plate_15 well	NO10G00630	CCGGCTTTCGAAGTCAACCA	Unknown protein	chr10: 210702	A	AC,ACC	AO=2,1	DP=180	frameshift_variant
01 Pool	11	01 Pool_11 plate_16 well	NO06G01150	CCTGTGCTTTATCAAAGAGG	Atp-dependent clp protease adaptor protein	chr6: 366503	AGAG	A	AO=2	DP=71	disruptive_inframe_deletion
01 Pool	11	01 Pool_11 plate_17 well	NO02G01740	TCTGCCCCTCGCATGTCCCG	Light-harvesting protein	chr2: 510929	GGA	GA,G	AO=8,3	DP=206	frameshift_variant
01 Pool	11	01 Pool_11 plate_18 well	NO02G01740	TCTGCCCCTCGCATGTCCCG	Light-harvesting protein	chr2: 510929	GGA	GA,G	AO=8,3	DP=206	frameshift_variant
01 Pool	11	01 Pool_11 plate_21 well	NO27G00400	TCGACGCACTATAATGCCAG	23S rRNA pseudouridine(2604) synthase;23S rRNA pseudouridine(2604) synthase;23S rRNA pseudouridine(2604) synthase	chr27: 148072	GC	G	AO=3	DP=148	frameshift_variant
01 Pool	11	01 Pool_11 plate_22 well	NO27G00400	TCGACGCACTATAATGCCAG	23S rRNA pseudouridine(2604) synthase;23S rRNA pseudouridine(2604) synthase;23S rRNA pseudouridine(2604) synthase	chr27: 148072	GC	G	AO=3	DP=148	frameshift_variant
01 Pool	11	01 Pool_11 plate_24 well	NO12G01580	GGAGAATGTCCAGAAACCCA	Beta-adaptin-like protein c	chr12: 481081	AC	A,ACT,AT	AO=2,1,1	DP=181	frameshift_variant
01 Pool	12	01 Pool_12 plate_03 well	NO02G05400	AGGTTGCTGGTGATGCATGA	Serine threonine protein;Serine threonine protein	chr2: 1441721	C	CA	AO=4	DP=113	frameshift_variant
01 Pool	12	01 Pool_12 plate_04 well	NO25G02030	GGCTTCATTAGACATTTGCG	Chalcone isomerase-like protein	chr25: 638592	CA	C	AO=1	DP=89	frameshift_variant
01 Pool	12	01 Pool_12 plate_04 well	NO05G02670	TCAGGGTATCCAAGGCAAGG	26S proteasome, regulatory subunit Rpn7;Proteasome component (PCI) domain	chr5: 708574	CA	C	AO=1	DP=99	frameshift_variant
01 Pool	12	01 Pool_12 plate_07 well	NO10G02600	TGGGAAGAGTGACCTCGCGG	Nicotinate-nucleotide--dimethylbenzimidazole phosphoribosyltransferase	chr10: 714701	TCG	T	AO=2	DP=121	frameshift_variant
01 Pool	12	01 Pool_12 plate_08 well	NO03G00200	ACAATCACAGGCTTGCCCTG	Regulator of telomere elongation helicase 1	chr3: 56811	CC	C,CG	AO=1,1	DP=125	frameshift_variant
01 Pool	12	01 Pool_12 plate_11 well	NO02G00960	CCGCAAACGTAAGAAAGGGA	Major facilitator superfamily protein	chr2: 303886	AG	A	AO=2	DP=124	frameshift_variant
01 Pool	12	01 Pool_12 plate_13 well	NO07G00400	TTGAAATGTAGCAAGCAGGG	Unknown protein	chr7: 153168	C	CA,CT	AO=1,3	DP=101	frameshift_variant
01 Pool	12	01 Pool_12 plate_13 well	NO02G05400	AGGTTGCTGGTGATGCATGA	Serine threonine protein;Serine threonine protein	chr2: 1441721	C	CA	AO=4	DP=113	frameshift_variant
01 Pool	12	01 Pool_12 plate_14 well	NO02G05400	AGGTTGCTGGTGATGCATGA	Serine threonine protein;Serine threonine protein	chr2: 1441721	C	CA	AO=4	DP=113	frameshift_variant
01 Pool	12	01 Pool_12 plate_15 well	NO05G02670	TCAGGGTATCCAAGGCAAGG	26S proteasome, regulatory subunit Rpn7;Proteasome component (PCI) domain	chr5: 708574	CA	C	AO=1	DP=99	frameshift_variant
01 Pool	12	01 Pool_12 plate_16 well	NO01G01240	GGCCAATATGTCTGTCAGAG	Carbonic anhydrase	chr1: 319778	C	CA,CAA	AO=2,1	DP=98	frameshift_variant
01 Pool	12	01 Pool_12 plate_22 well	NO27G01580	TAGCAAGTACCTCTGCAAGA	Zinc metalloendopeptidase	chr27: 525885	CA	T,C	AO=4,1	DP=117	frameshift_variant&synonymous_variant
01 Pool	12	01 Pool_12 plate_23 well	NO03G05180	TAATATGGTAAACTCATGCG	UDP-glucose 4-epimerase	chr3: 1473381	CATG	C	AO=1	DP=120	disruptive_inframe_deletion
01 Pool	13	01 Pool_13 plate_01 well	NO24G01340	GGGTGGAAAACATGTTCCTG	Unknown protein	chr24: 365629	AG	A	AO=1	DP=103	frameshift_variant
01 Pool	13	01 Pool_13 plate_02 well	NO11G00660	CTGAACCATACCCAACCTAG	Short-chain dehydrogenase reductase sdr;Short-chain dehydrogenase reductase sdr	chr11: 282606	CT	C	AO=2	DP=85	frameshift_variant
01 Pool	13	01 Pool_13 plate_04 well	NO09G02210	ATATGATGGTGACACGACGA	Dual specificity protein phosphatase 3	chr9: 669118	A	AC	AO=3	DP=105	frameshift_variant
01 Pool	13	01 Pool_13 plate_07 well	NO21G01630	GGCATGTCTTACTCGCCACG	Reticulon 4 interacting protein 1	chr21: 485569	TCGC	T	AO=1	DP=122	stop_gained&disruptive_inframe_deletion
01 Pool	13	01 Pool_13 plate_11 well	NO10G00300	GGCATGTCAAGGTACGAGAG	Unknown protein	chr10: 103964	CGA	CA,C,CG	AO=2,1,3	DP=98	frameshift_variant
01 Pool	13	01 Pool_13 plate_22 well	NO02G00890	GCCTCCGCATACTATATGGG	Protein phosphatase 2C, manganese/magnesium aspartate binding site	chr2: 289538	C	CA	AO=1	DP=69	frameshift_variant
01 Pool	14	01 Pool_14 plate_03 well	NO24G00440	CTGCCCAAGATAATACGACA	Ferredoxin (2fe-2s)	chr24: 150324	TACG	T,CACG	AO=2,1	DP=131	missense_variant
01 Pool	14	01 Pool_14 plate_04 well	NO29G00660	GCATCGGTGAACAAATGACG	Unknown protein	chr29: 249859	CTCG	C	AO=1	DP=144	disruptive_inframe_deletion
01 Pool	14	01 Pool_14 plate_07 well	NO02G03540	TCGAAGCAGGAGGAGCCATG	Unknown protein	chr2: 948891	T	TG	AO=4	DP=123	frameshift_variant
01 Pool	14	01 Pool_14 plate_09 well	NO09G03570	GTATGCGTAGATGCCATGTG	ATPase ASNA1 homolog	chr9: 1026301	A	AT	AO=5	DP=115	frameshift_variant
01 Pool	14	01 Pool_14 plate_11 well	NO05G04360	GTAAGTCATCACCTCACGAG	Unknown protein	chr5: 1124772	CG	C	AO=10	DP=137	frameshift_variant
01 Pool	14	01 Pool_14 plate_13 well	NO18G00080	AGCGCTCTATTTAATAAGTG	Unknown protein	chr18: 42959	A	AT	AO=1	DP=75	frameshift_variant
01 Pool	14	01 Pool_14 plate_14 well	NO01G02990	TACTTTCAGGAGACCGAATG	Methyltransferase family protein	chr1: 788973	AT	A,ATT,ATA	AO=1,1,1	DP=127	frameshift_variant
01 Pool	14	01 Pool_14 plate_15 well	NO29G00660	GCATCGGTGAACAAATGACG	Unknown protein	chr29: 249859	CTCG	C	AO=1	DP=144	disruptive_inframe_deletion
01 Pool	14	01 Pool_14 plate_17 well	NO23G00130	TTTGACGTCCAACCAATACG	1,4-beta-D-glucan cellobiohydrolase C	chr23: 66741	T	TA	AO=1	DP=64	frameshift_variant&stop_gained
01 Pool	14	01 Pool_14 plate_20 well	NO16G00680	TGATGTGGTAGGAGACGTGG	Ribosomal rna large subunit methyltransferase i;Ribosomal rna large subunit methyltransferase i;Ribosomal rna large subunit methyltransferase i	chr16: 235704	GTGGTAGGAGACG	G,GTGGTAGGAGACGT	AO=6,1	DP=127	frameshift_variant
01 Pool	14	01 Pool_14 plate_21 well	NO07G02430	TAAAGGTCCCGACTAAAGTG	Small nuclear ribonucleoprotein associated protein b	chr7: 706137	T	TAAA	AO=2	DP=98	disruptive_inframe_insertion
01 Pool	14	01 Pool_14 plate_22 well	NO29G00290	GACAGGGTTCGAAAACAAGG	Dna mismatch repair protein Msh4 putative;Dna mismatch repair protein Msh4 putative	chr29: 119162	C	CT	AO=2	DP=75	frameshift_variant
01 Pool	14	01 Pool_14 plate_23 well	NO09G03570	GTATGCGTAGATGCCATGTG	ATPase ASNA1 homolog	chr9: 1026301	A	AT	AO=5	DP=115	frameshift_variant
01 Pool	14	01 Pool_14 plate_24 well	NO27G00990	CTTGTACATCTCAATCACAT	Unknown protein	chr27: 325410	A	AA,AT	AO=2,1	DP=137	frameshift_variant
01 Pool	14	01 Pool_14 plate_24 well	NO29G01410	CCACTGTTGGGGAAGCCGTG	Unknown protein	chr29: 451273	AGC	A	AO=1	DP=83	frameshift_variant
01 Pool	15	01 Pool_15 plate_01 well	NO20G01520	TAGGCTGTAGATGCGCATCG	ATP-dependent Clp protease proteolytic subunit	chr20: 467622	ATG	A,AT,AGTG	AO=1,2,2	DP=175	frameshift_variant
01 Pool	15	01 Pool_15 plate_02 well	NO08G00890	GGTGATCAAGACGATTTCGA	Dna replication licensing factor mcm8;Dna replication licensing factor mcm8;Dna replication licensing factor mcm8;Dna replication licensing factor mcm8;Dna replication licensing factor mcm8	chr8: 288217	T	TC	AO=1	DP=140	frameshift_variant
01 Pool	15	01 Pool_15 plate_03 well	NO08G00890	GGTGATCAAGACGATTTCGA	Dna replication licensing factor mcm8;Dna replication licensing factor mcm8;Dna replication licensing factor mcm8;Dna replication licensing factor mcm8;Dna replication licensing factor mcm8	chr8: 288217	T	TC	AO=1	DP=140	frameshift_variant
01 Pool	15	01 Pool_15 plate_04 well	NO13G02890	AAACGACAACACCAGCTGGG	Calcineurin-like phosphoesterase domain-containing protein 1 isoform a	chr13: 805366	C	CT,CTT	AO=2,1	DP=119	frameshift_variant
01 Pool	15	01 Pool_15 plate_04 well	NO05G01030	AAAGCACTCCGAGACATGGG	Unknown protein	chr5: 308785	GAC	G	AO=1	DP=151	frameshift_variant
01 Pool	15	01 Pool_15 plate_08 well	NO14G00970	ATTTTCATCCAAAAGCAGGG	Beta-aspartyl asparaginyl family	chr14: 327856	G	CTG,A	AO=1,1	DP=96	frameshift_variant
01 Pool	15	01 Pool_15 plate_08 well	NO22G00860	GTGGTTCTGTACGCGCACGG	Alpha beta hydrolase fold-3 domain protein	chr22: 276310	G	GT	AO=2	DP=128	frameshift_variant
01 Pool	15	01 Pool_15 plate_11 well	NO08G02420	GTGCGCGTATTGCTCCTCTG	Protein SCO1 homolog, mitochondrial;Protein SCO1 homolog, mitochondrial;Protein SCO1 homolog, mitochondrial;Sco1 family protein;Sco1 family protein	chr8: 705411	C	G	AO=4	DP=142	missense_variant
01 Pool	15	01 Pool_15 plate_12 well	NO22G00860	GTGGTTCTGTACGCGCACGG	Alpha beta hydrolase fold-3 domain protein	chr22: 276310	G	GT	AO=2	DP=128	frameshift_variant
01 Pool	15	01 Pool_15 plate_13 well	NO02G04070	GGGCATCGAAACGTACAGGA	Subunit of proteaseome activator complex;Subunit of proteaseome activator complex;Subunit of proteaseome activator complex	chr2: 1108585	A	ACTCTG	AO=7	DP=155	frameshift_variant
01 Pool	15	01 Pool_15 plate_15 well	NO05G01030	AAAGCACTCCGAGACATGGG	Unknown protein	chr5: 308785	GAC	G	AO=1	DP=151	frameshift_variant
01 Pool	15	01 Pool_15 plate_15 well	NO19G00130	ACGTGCCATCAGGACCAGCG	Histidine phosphatase superfamily, clade-2	chr19: 41539	CA	CAG,GG	AO=2,1	DP=162	frameshift_variant
01 Pool	15	01 Pool_15 plate_16 well	NO04G04860	TCGCTAATAACTCGTCCACG	Lactase-phlorizin hydrolase;Lactase-phlorizin hydrolase	chr4: 1330627	TC	T	AO=1	DP=71	frameshift_variant
01 Pool	15	01 Pool_15 plate_19 well	NO08G00890	GGTGATCAAGACGATTTCGA	Dna replication licensing factor mcm8;Dna replication licensing factor mcm8;Dna replication licensing factor mcm8;Dna replication licensing factor mcm8;Dna replication licensing factor mcm8	chr8: 288217	T	TC	AO=1	DP=140	frameshift_variant
01 Pool	15	01 Pool_15 plate_21 well	NO05G04980	ACAACGAGACGATGACGCAG	Regulator of nonsense transcripts UPF2	chr5: 1298190	G	GA	AO=1	DP=97	frameshift_variant
01 Pool	15	01 Pool_15 plate_22 well	NO15G00130	CGCTATCGCCACCCACATCG	Unknown protein	chr15: 30921	A	AG	AO=1	DP=70	frameshift_variant
01 Pool	15	01 Pool_15 plate_22 well	NO02G06050	CATGCCCAACTTTCGCACGG	Transcriptional activator myb	chr2: 1620050	CGT	C	AO=1	DP=136	frameshift_variant
01 Pool	15	01 Pool_15 plate_24 well	NO16G02450	CAATGGTTTATGGAGCACAA	Histone-lysine n-methyltransferase setd3 isoform a	chr16: 706953	TTG	T	AO=2	DP=151	frameshift_variant
01 Pool	16	01 Pool_16 plate_01 well	NO10G00760	GGTGGTACATAAGAGCCCGA	Unknown protein	chr10: 250209	CG	C	AO=2	DP=214	frameshift_variant
01 Pool	16	01 Pool_16 plate_02 well	NO22G01020	CGGTAGCACCAGCACCACAG	N-alpha-acetyltransferase catalytic subunit	chr22: 317271	GT	GGG,G	AO=1,1	DP=151	frameshift_variant
01 Pool	16	01 Pool_16 plate_03 well	NO07G04000	CGACGTGATGGAGAAAACGG	Unknown protein	chr7: 1113639	A	AT	AO=1	DP=160	frameshift_variant
01 Pool	16	01 Pool_16 plate_04 well	NO07G00100	CAATACATCACGCTGCGACA	LARGE xylosyl- and glucuronyltransferase 2	chr7: 37461	G	GT	AO=2	DP=227	frameshift_variant
01 Pool	16	01 Pool_16 plate_05 well	NO08G02080	TCATCAATCGACCCCCCACG	Serine threonine-protein kinase ctr1	chr8: 615342	G	GG,GT,C	AO=1,6,2	DP=213	frameshift_variant
01 Pool	16	01 Pool_16 plate_06 well	NO10G00760	GGTGGTACATAAGAGCCCGA	Unknown protein	chr10: 250209	CG	C	AO=2	DP=214	frameshift_variant
01 Pool	16	01 Pool_16 plate_07 well	NO05G04600	GATTGTTGACGAGATGGTGA	Rieske (2fe-2s) domain protein	chr5: 1198341	TCAC	C,T,TCAAC,TCAAAC,TCACC,TCAGC	AO=1,1,1,1,4,3	DP=163	frameshift_variant
01 Pool	16	01 Pool_16 plate_07 well	NO27G00210	CGCGAGAAGTGGGAGTGGTG	Unknown protein	chr27: 73848	AGT	A	AO=13	DP=138	frameshift_variant
01 Pool	16	01 Pool_16 plate_08 well	NO27G00210	CGCGAGAAGTGGGAGTGGTG	Unknown protein	chr27: 73848	AGT	A	AO=13	DP=138	frameshift_variant
01 Pool	16	01 Pool_16 plate_10 well	NO09G00380	GACGACGAGTACGACCACCA	Splicing factor 3b subunit 2	chr9: 176045	TTGG	T,TTGGG	AO=10,1	DP=164	frameshift_variant
01 Pool	16	01 Pool_16 plate_12 well	NO15G03330	AAAGCGAACCGATCTCACGG	Myc-induced nuclear antigen	chr15: 971872	G	GA,GT	AO=5,5	DP=220	frameshift_variant
01 Pool	16	01 Pool_16 plate_13 well	NO12G03020	GAGCGCGGTCCACTCACGTG	Unknown protein	chr12: 832079	ACGT	CCGA,GT	AO=1,7	DP=206	frameshift_variant
01 Pool	16	01 Pool_16 plate_14 well	NO27G00210	CGCGAGAAGTGGGAGTGGTG	Unknown protein	chr27: 73848	AGT	A	AO=13	DP=138	frameshift_variant
01 Pool	16	01 Pool_16 plate_15 well	NO11G03180	GGGTCGAAACAAACCCGCCG	Unknown protein	chr11: 994542	CG	C	AO=7	DP=192	frameshift_variant
01 Pool	16	01 Pool_16 plate_19 well	NO04G01210	GGTAACCTAGAAGCTCTCGG	Unknown protein;Unknown protein	chr4: 380110	C	CT	AO=2	DP=187	frameshift_variant
01 Pool	16	01 Pool_16 plate_21 well	NO14G03150	GAGCATGTAGGCATCGACGG	Gramicidin S biosynthesis protein GrsT	chr14: 940105	G	GA	AO=2	DP=130	frameshift_variant
01 Pool	16	01 Pool_16 plate_23 well	NO22G00820	TTGTATACTGAGATACCTGG	Ring finger protein 10;Ring finger protein 10	chr22: 268813	CCTCCAGGTA	TGTATAC,CCTCCGGTA,CCTCCAAGGTA	AO=1,1,1	DP=66	frameshift_variant
01 Pool	16	01 Pool_16 plate_24 well	NO29G00650	GCGCACGCTCGACAGCAAGG	Lactoylglutathione lyase / glyoxalase I family protein	chr29: 247308	CT	C,CTT	AO=2,1	DP=98	frameshift_variant
01 Pool	17	01 Pool_17 plate_01 well	NO30G01070	TCCCCTTAAGTCGAGCGTAG	Transducin family protein/WD-40 repeat family protein	chr30: 394512	ACGCT	A,ACACGCT	AO=5,1	DP=177	frameshift_variant
01 Pool	17	01 Pool_17 plate_03 well	NO16G02710	CATCTTTTGGTGTCCCAGGG	Peptidyl-prolyl cis-trans isomerase	chr16: 781062	A	AA,AC	AO=1,1	DP=177	frameshift_variant
01 Pool	17	01 Pool_17 plate_04 well	NO05G01200	ATGCTGACCTAGAAATGCGG	Tripeptidyl-peptidase 2	chr5: 350645	ATG	A,ATGC,ATGT	AO=1,1,7	DP=195	frameshift_variant
01 Pool	17	01 Pool_17 plate_06 well	NO08G02900	GGCGGCGAAGTACAGCATGG	Solute carrier family 25 (Mitochondrial carrier citrate transporter) member 1;Solute carrier family 25 (Mitochondrial carrier citrate transporter) member 1	chr8: 813301	A	AA,AC	AO=6,6	DP=215	frameshift_variant
01 Pool	17	01 Pool_17 plate_07 well	NO03G02420	GCTTGGGCGAGCTCTCGACG	Fe-s oxidoreductase	chr3: 692439	G	GT	AO=9	DP=215	frameshift_variant
01 Pool	17	01 Pool_17 plate_08 well	NO03G02950	GAGAGGCTTGGAAACTGTCT	Unknown protein	chr3: 887215	CCAGA	C,CCAGAA	AO=9,1	DP=174	frameshift_variant
01 Pool	17	01 Pool_17 plate_10 well	NO02G00090	CTCGTGATCAGAGAGGACGT	Peptidase m1 membrane alanine aminopeptidase	chr2: 23661	CTACG	C,CTAGG	AO=1,1	DP=195	frameshift_variant
01 Pool	17	01 Pool_17 plate_11 well	NO16G02710	CATCTTTTGGTGTCCCAGGG	Peptidyl-prolyl cis-trans isomerase	chr16: 781062	A	AA,AC	AO=1,1	DP=177	frameshift_variant
01 Pool	17	01 Pool_17 plate_13 well	NO08G03410	TGGGCTGGGTAGGAAAAACG	ATP binding cassette subfamily B4	chr8: 946509	GA	G,GAAA	AO=9,2	DP=232	frameshift_variant
01 Pool	17	01 Pool_17 plate_14 well	NO11G01600	GGTGTTGACGAGTTGCCTTG	Histone deacetylases (HDA1 superfamily)	chr11: 532999	GG	A,G	AO=2,8	DP=217	frameshift_variant&missense_variant
01 Pool	17	01 Pool_17 plate_15 well	NO26G01410	ACGGGTCGTCCATGTCGCCC	Vacuolar protein sorting-associated protein 29	chr26: 447703	C	CG	AO=2	DP=218	frameshift_variant
01 Pool	17	01 Pool_17 plate_19 well	NO07G03950	CTGCTGGGAAGGATGCCTGG	Zinc finger, MYND-type	chr7: 1101738	C	T	AO=2	DP=190	missense_variant
01 Pool	17	01 Pool_17 plate_20 well	NO04G00370	TGGAAAGGAGAACTGCGATG	Unknown protein	chr4: 149684	G	GT	AO=4	DP=206	frameshift_variant
01 Pool	17	01 Pool_17 plate_21 well	NO19G00580	ATATCTCAACGGGTCCACAA	PDZ domain protein;PDZ domain protein;PDZ domain protein	chr19: 224205	AC	A,AGC	AO=1,1	DP=100	frameshift_variant
01 Pool	17	01 Pool_17 plate_24 well	NO14G00760	AAATAGGGGAACCAGCCCAG	Myb family transcription factor	chr14: 270697	GC	G	AO=1	DP=214	frameshift_variant
01 Pool	18	01 Pool_18 plate_01 well	NO22G02010	GTTGACCGAGACCAATAACG	Unknown protein	chr22: 608734	CAAT	C	AO=1	DP=14	disruptive_inframe_deletion
01 Pool	18	01 Pool_18 plate_04 well	NO25G00830	GATCACAGCCCAAGACACAG	Glycoprotein glucosyltransferase	chr25: 228845	TGT	T,TG,TGTT	AO=1,3,1	DP=191	frameshift_variant
01 Pool	18	01 Pool_18 plate_05 well	NO14G02470	GGTAGCGTACTGATCCACTG	Methyltransferase	chr14: 739466	AG	A,AGT	AO=1,4	DP=145	frameshift_variant
01 Pool	18	01 Pool_18 plate_06 well	NO06G02420	CTTCCCTGATGACAACGTTG	Unknown protein	chr6: 686821	A	ACG	AO=1	DP=158	frameshift_variant
01 Pool	18	01 Pool_18 plate_07 well	NO02G05350	TAAGGGCGCCAATAGCATTG	Tyrosine-specific transport;Tyrosine-specific transport	chr2: 1432067	CGGCGACCGCAATGCTATT	CGGCGACCGCACTT,C,CGGCGACCGCAAAATGCTATT,CGGCGACCGCAACTGCTATT,CGGCGACCGCAAGTGCTATT	AO=1,1,1,1,2	DP=119	frameshift_variant&missense_variant
01 Pool	18	01 Pool_18 plate_09 well	NO25G01820	TGATCACCGGGATGGCCCAG	Camphor resistance protein	chr25: 545222	GC	G,GG	AO=6,1	DP=186	frameshift_variant
01 Pool	18	01 Pool_18 plate_10 well	NO04G02180	AATCCTTGGAAAAAAAACCG	Glycoside hydrolase family 8	chr4: 627087	TT	T,TTT,TA	AO=2,2,1	DP=187	frameshift_variant
01 Pool	18	01 Pool_18 plate_12 well	NO10G00690	ACTCAGTGCACATTCCGACG	Dna ligase	chr10: 230056	TC	T	AO=1	DP=160	frameshift_variant
01 Pool	18	01 Pool_18 plate_13 well	NO11G01160	GCTCATCAAGTTCTACAAGG	Ran protein binding protein;Ran protein binding protein	chr11: 419512	CA	C	AO=11	DP=177	frameshift_variant
01 Pool	18	01 Pool_18 plate_16 well	NO05G05380	CAACGTGGAAGAAATAGATG	UPF0301 protein BDI_1431;Unknown protein	chr5: 1444732	TAG	T,TAT	AO=2,2	DP=133	frameshift_variant
01 Pool	18	01 Pool_18 plate_18 well	NO09G02620	ACAGCAACGAACGAGCAAGG	Unknown protein	chr9: 783170	CA	C,CAC,CAT	AO=1,3,3	DP=174	frameshift_variant
01 Pool	18	01 Pool_18 plate_19 well	NO05G01420	GCAGACCAACTGCAGCTCCA	UPF0394 membrane protein PD_1893	chr5: 403243	AGC	A,AG,AGCT	AO=1,2,1	DP=175	frameshift_variant
01 Pool	18	01 Pool_18 plate_20 well	NO28G00490	TTGGAAATCGATATCGCCGC	Unknown protein	chr28: 178149	G	GT	AO=8	DP=151	frameshift_variant
01 Pool	18	01 Pool_18 plate_21 well	NO24G02060	TCGCAAGTTATCTTCCCACG	Generic methyltransferase	chr24: 548692	CA	A,C,CCA,CGA	AO=5,2,1,1	DP=167	frameshift_variant
01 Pool	18	01 Pool_18 plate_22 well	NO01G03610	AAAAGTAATCACGTGAAGAG	Unknown protein	chr1: 956683	C	CT	AO=4	DP=136	frameshift_variant
01 Pool	18	01 Pool_18 plate_23 well	NO09G03530	GCTCCGTGATTAAGGCCACG	Acetylornithine deacetylase;Acetylornithine deacetylase	chr9: 1011820	GC	G,GCC	AO=5,2	DP=156	frameshift_variant
01 Pool	19	01 Pool_19 plate_01 well	NO13G02590	AGCGCTGGAGATTCGCATGG	Chaperone protein	chr13: 718880	CA	CAA,CAC,AG	AO=2,1,1	DP=212	frameshift_variant
01 Pool	19	01 Pool_19 plate_06 well	NO10G02280	TTGAGTACCTTAGGGCATCG	Serine protease family	chr10: 628834	CGCCCCGAT	C,CGCCCCGAA	AO=1,2	DP=213	frameshift_variant
01 Pool	19	01 Pool_19 plate_08 well	NO20G02380	CATTGTCGATGAGAACAACC	Nudix hydrolase;Nudix hydrolase	chr20: 720842	G	GT	AO=3	DP=150	frameshift_variant
01 Pool	19	01 Pool_19 plate_09 well	NO11G01010	AGGCCAGTTTCAGCACGTAG	co-factor for nitrate, reductase and xanthine dehydrogenase 5	chr11: 383196	CTACG	C	AO=1	DP=209	frameshift_variant
01 Pool	19	01 Pool_19 plate_11 well	NO28G00780	TATTACCATCAAGCTCAACG	Gtp-binding protein	chr28: 259684	C	CA	AO=2	DP=196	frameshift_variant
01 Pool	19	01 Pool_19 plate_12 well	NO12G02960	GGTGCTACCAGAGAACGCTG	D-aminoacid aminotransferase-like plp-dependent enzyme-like protein	chr12: 816824	G	GC,GCC	AO=1,1	DP=182	frameshift_variant
01 Pool	19	01 Pool_19 plate_13 well	NO12G02960	GGTGCTACCAGAGAACGCTG	D-aminoacid aminotransferase-like plp-dependent enzyme-like protein	chr12: 816824	G	GC,GCC	AO=1,1	DP=182	frameshift_variant
01 Pool	19	01 Pool_19 plate_17 well	NO25G01230	CCCATTAGATGTACCAACCG	Plasma glutamate carboxypeptidase	chr25: 341722	AC	C,A	AO=1,1	DP=208	frameshift_variant
01 Pool	19	01 Pool_19 plate_19 well	NO09G01430	GGAGATAGGAGAGATCTTCG	Ppgpp synthetase	chr9: 463256	TCT	T,TCTT,TCTC	AO=1,3,11	DP=211	frameshift_variant
01 Pool	19	01 Pool_19 plate_21 well	NO04G02860	TTGACGCACAAGTCTCCCCG	Ribonuclease H-like domain	chr4: 751936	C	CG,T	AO=4,1	DP=192	frameshift_variant
01 Pool	19	01 Pool_19 plate_24 well	NO01G04570	CAATACCAACATCGGCACCA	Unknown protein	chr1: 1206178	C	CA	AO=3	DP=180	frameshift_variant
01 Pool	20	01 Pool_20 plate_01 well	NO03G00190	TTAGCAAAGACGGTTGTGGG	Metabotropic glutamate receptor-like protein E	chr3: 49983	CCA	C	AO=7	DP=212	frameshift_variant
01 Pool	20	01 Pool_20 plate_02 well	NO04G01050	CGTATTGACGATGCCGTGAG	Queuine tRNA-ribosyltransferase catalytic subunit 1	chr4: 337802	G	GT	AO=7	DP=168	frameshift_variant
01 Pool	20	01 Pool_20 plate_03 well	NO07G03960	GCAATTTGCCACCATAACGG	Tryptophan-rich sensory-like protein	chr7: 1102440	ACG	A	AO=9	DP=213	frameshift_variant
01 Pool	20	01 Pool_20 plate_04 well	NO03G03920	GAGTATGGGACACAAAGTGG	Small GTP-binding protein domain protein	chr3: 1149046	AGT	A	AO=11	DP=189	frameshift_variant
01 Pool	20	01 Pool_20 plate_08 well	NO06G00550	GCTTTAACAGAAAGCCCTCG	Kinesin-like protein	chr6: 220397	A	AG	AO=1	DP=200	frameshift_variant
01 Pool	20	01 Pool_20 plate_11 well	NO23G01580	CAGGAACGATTTCCAACCAG	Amidohydrolase 2;Amidohydrolase 2;Amidohydrolase 2;Amidohydrolase 2	chr23: 582416	TG	T	AO=1	DP=206	frameshift_variant
01 Pool	20	01 Pool_20 plate_13 well	NO06G01420	GAATGCAAGATGGACAGAGG	Unknown protein	chr6: 454168	TTTTTTTGGG	TTTTTTGGG,TTTTTTTGGC,ATTTTTTGGG,TTTCTTTGGG	AO=1,1,1,1	DP=135	frameshift_variant
01 Pool	20	01 Pool_20 plate_14 well	NO03G00270	CTCCAACCAGAACAACCGCG	Unknown protein	chr3: 83034	CG	G,C,AG	AO=1,2,1	DP=202	frameshift_variant
01 Pool	20	01 Pool_20 plate_15 well	NO29G00770	GTTAGTGGCATAAAAAACGT	Glucose N-acetyltransferase 1-A;Glucose N-acetyltransferase 1-A;Glucose N-acetyltransferase 1-A	chr29: 287118	GT	G	AO=1	DP=209	frameshift_variant
01 Pool	20	01 Pool_20 plate_16 well	NO19G02550	ACGCAAGGGTGGAATCAATG	Golgi to ER traffic protein 4 homolog	chr19: 758835	AT	A	AO=2	DP=51	frameshift_variant
01 Pool	20	01 Pool_20 plate_17 well	NO21G02650	GACCGTGACGAAGAGCGGAG	Nucleotide excision repair factor NEF2, RAD4/CUT5 component	chr21: 817605	AGC	A	AO=1	DP=66	frameshift_variant
01 Pool	20	01 Pool_20 plate_24 well	NO15G03250	AATGCCCTCCAGGAGCACCG	RAVE complex protein Rav1;transducin family protein / WD-40 repeat family protein;RAVE complex protein Rav1	chr15: 942473	G	T	AO=2	DP=181	missense_variant
01 Pool	21	01 Pool_21 plate_01 well	NO04G04800	GGTTTGATGAGGTATCATCG	Acyl-coenzyme a thioesterase 13;Acyl-coenzyme a thioesterase 13	chr4: 1310139	TATC	T	AO=1	DP=191	disruptive_inframe_deletion
01 Pool	21	01 Pool_21 plate_03 well	NO25G01940	TGGCATGAGAACCCACAAGA	Sodium bile acid cotransporter 7;Sodium bile acid cotransporter 7;Sodium bile acid cotransporter 7	chr25: 594989	GAGAACCCACA	G,GAGAAACCACA	AO=4,1	DP=180	frameshift_variant
01 Pool	21	01 Pool_21 plate_05 well	NO13G01630	GTTGAGCGCACCGTTCCCCG	Unknown protein	chr13: 485899	TC	T	AO=6	DP=212	frameshift_variant
01 Pool	21	01 Pool_21 plate_07 well	NO04G00470	GGTGTACTTTGGAGACAACG	MFS family major facilitator transporter	chr4: 177440	TTG	TG,T,TT	AO=7,2,1	DP=189	frameshift_variant
01 Pool	21	01 Pool_21 plate_08 well	NO17G01370	TGAAACGCACATGACACCAG	Protein nlrc3	chr17: 423357	GGT	GT,G,GGTGT	AO=1,1,1	DP=185	frameshift_variant
01 Pool	21	01 Pool_21 plate_09 well	NO02G00680	GATCTGGGAAGGCGTGACAA	BolA protein	chr2: 233949	G	GT	AO=5	DP=230	frameshift_variant
01 Pool	21	01 Pool_21 plate_10 well	NO17G01350	AAGATCACCAATGCAGTGCA	Unknown protein	chr17: 415249	G	GT	AO=3	DP=186	frameshift_variant
01 Pool	21	01 Pool_21 plate_12 well	NO06G02010	GAATATGGAAGGAAGCAACG	Protein phosphatase 2C family protein	chr6: 594192	AA	A,AAA,AC	AO=2,1,1	DP=152	frameshift_variant
01 Pool	21	01 Pool_21 plate_13 well	NO03G03310	ACTCACTCTCGTTTAAACAG	Protein of unknown function (DUF1000);Protein of unknown function (DUF1000)	chr3: 992427	TA	T	AO=1	DP=196	frameshift_variant
01 Pool	21	01 Pool_21 plate_22 well	NO01G02880	GAAATACAGAGACAGGCAGT	Transcription factor 25	chr1: 748438	GC	G	AO=6	DP=207	frameshift_variant
01 Pool	22	01 Pool_22 plate_04 well	NO02G01680	TTTACACTTTTGCCGCAGAG	Poly-specific ribonuclease parn	chr2: 494708	A	AG	AO=3	DP=180	frameshift_variant
01 Pool	22	01 Pool_22 plate_06 well	NO01G01150	GAGTGTATTTACGACCAGGG	DNA-directed RNA polymerase subunit beta	chr1: 294280	GCCC	G	AO=2	DP=163	disruptive_inframe_deletion
01 Pool	22	01 Pool_22 plate_07 well	NO09G00580	GCAGGGTTTCTACCACGACA	L-aminoadipate-semialdehyde dehydrogenase-phosphopantetheinyl	chr9: 227550	CG	C	AO=8	DP=171	frameshift_variant
01 Pool	22	01 Pool_22 plate_10 well	NO11G01270	TGACAAAGAAATGCACCAGG	Unknown protein	chr11: 443795	AC	A	AO=1	DP=162	frameshift_variant
01 Pool	22	01 Pool_22 plate_18 well	NO13G03430	ACAGCGGGAAGCTTACCCTG	Unknown protein	chr13: 1025927	AC	A	AO=9	DP=164	frameshift_variant
01 Pool	22	01 Pool_22 plate_21 well	NO01G01150	GAGTGTATTTACGACCAGGG	DNA-directed RNA polymerase subunit beta	chr1: 294280	GCCC	G	AO=2	DP=163	disruptive_inframe_deletion
01 Pool	22	01 Pool_22 plate_23 well	NO02G03820	CCACCGTCAGTGCAGCCAGG	Unknown protein	chr2: 1042462	C	CT	AO=1	DP=167	frameshift_variant&stop_gained
01 Pool	22	01 Pool_22 plate_24 well	NO01G00920	GGCAGACATGGCTATCCCTG	Atp synthase subunit epsilon	chr1: 232470	TC	T,CC	AO=2,1	DP=173	frameshift_variant
01 Pool	23	01 Pool_23 plate_01 well	NO21G02110	TGACAGACGCAAATGCCACG	Unknown protein	chr21: 625522	GC	G	AO=1	DP=180	frameshift_variant
01 Pool	23	01 Pool_23 plate_02 well	NO08G02600	GGGTTGCTACCATGATCCGG	Protein of unknown function (DUF1350)	chr8: 733223	TC	T	AO=6	DP=175	frameshift_variant
01 Pool	23	01 Pool_23 plate_09 well	NO02G03350	AGGTGGCCACCAGCTGCAGG	Unknown protein	chr2: 902247	CCTG	G,CCTA	AO=2,1	DP=146	missense_variant
01 Pool	23	01 Pool_23 plate_11 well	NO16G02690	AGCGAAGTTGAAAAACATGG	Extrinsic protein in photosystem II	chr16: 776955	C	CA	AO=5	DP=173	frameshift_variant
01 Pool	23	01 Pool_23 plate_12 well	NO09G02700	ACAGAAAGACGAATACAACA	D-aminoacyl-tRNA deacylases	chr9: 802700	GTGT	G,GTGTT,GTGTTG	AO=1,6,6	DP=213	frameshift_variant
01 Pool	23	01 Pool_23 plate_13 well	NO05G01780	CCATAAATATTCACCCCCGG	Unknown protein	chr5: 490074	C	CA	AO=2	DP=190	frameshift_variant
01 Pool	23	01 Pool_23 plate_14 well	NO09G02700	ACAGAAAGACGAATACAACA	D-aminoacyl-tRNA deacylases	chr9: 802700	GTGT	G,GTGTT,GTGTTG	AO=1,6,6	DP=213	frameshift_variant
01 Pool	23	01 Pool_23 plate_15 well	NO12G02220	GAAATTGTCTTCGTAGGGCG	ubiquitin-conjugating enzyme 35;Ubiquitin-conjugating enzyme	chr12: 635548	AG	A	AO=3	DP=165	frameshift_variant
01 Pool	23	01 Pool_23 plate_16 well	NO26G01420	AATCACTAAAGAAATCCATG	nuclear poly(a) polymerase	chr26: 449546	TG	T	AO=5	DP=188	frameshift_variant
01 Pool	23	01 Pool_23 plate_18 well	NO09G01830	CTCTTATCATCGCTACAAGG	Glycosyl hydrolase family 1	chr9: 561577	CA	C	AO=3	DP=176	frameshift_variant
01 Pool	23	01 Pool_23 plate_24 well	NO18G01180	GTACCATTCGCAAATCCCGG	Subtilisin-like serine peptidase	chr18: 409210	GGG	GG,G,GGGG,GAGG,GGT	AO=4,2,1,1,1	DP=197	frameshift_variant
01 Pool	24	01 Pool_24 plate_04 well	NO19G02210	CCATGAGAGAGTTTTACCCG	Unknown protein	chr19: 632181	AC	A,ACA	AO=3,2	DP=106	frameshift_variant
01 Pool	24	01 Pool_24 plate_04 well	NO18G02010	GTCAACGAGCTGGGTCAGGG	Acyl-coenzyme A oxidase	chr18: 622289	CCTGAC	C,CCT,CCGTGAC,CCTTGAC,CCTTTGAC	AO=2,1,1,2,1	DP=207	frameshift_variant
01 Pool	24	01 Pool_24 plate_05 well	NO15G02960	GTAGATTTCAGGTAAAGCAA	Unknown protein	chr15: 804441	TAAAGCAACGGAA	TAAAGCAACGGA,T,TAAAGCAACGGAC,TAAATCAACGGAA	AO=1,2,1,2	DP=144	frameshift_variant
01 Pool	24	01 Pool_24 plate_06 well	NO09G01400	GTTTACGGTGATGTGATGGG	Unknown protein	chr9: 452615	CCATCA	C	AO=2	DP=121	frameshift_variant
01 Pool	24	01 Pool_24 plate_08 well	NO02G01960	TGGCATGAGTGGCATCCGCG	Unknown protein	chr2: 563446	CG	C	AO=4	DP=206	frameshift_variant
01 Pool	24	01 Pool_24 plate_09 well	NO21G02380	GCTTGAAGAATACTTCCCCG	Ankyrin repeat protein, putative	chr21: 716917	GGAA	GAA,AA,GGGAA,GGTA,GGAC	AO=2,5,2,1,1	DP=202	frameshift_variant
01 Pool	24	01 Pool_24 plate_11 well	NO03G01900	GCTCCAAAAGCTCTTCACGT	Sporangia induced sperm flagellar protein	chr3: 585078	CGTGAAGA	CGTTTAAGA,CGTTTTAGA,C,CGGTGAAGA,CGCTGAAGA	AO=1,1,1,1,1	DP=176	frameshift_variant
01 Pool	24	01 Pool_24 plate_15 well	NO18G02010	GTCAACGAGCTGGGTCAGGG	Acyl-coenzyme A oxidase	chr18: 622289	CCTGAC	C,CCT,CCGTGAC,CCTTGAC,CCTTTGAC	AO=2,1,1,2,1	DP=207	frameshift_variant
01 Pool	24	01 Pool_24 plate_16 well	NO01G00580	GAAATTGAAAAACTCCGCAA	Polyketide cyclase/dehydrase;Polyketide cyclase/dehydrase;Polyketide cyclase/dehydrase;Polyketide cyclase/dehydrase;Polyketide cyclase/dehydrase	chr1: 159635	G	GA	AO=1	DP=186	frameshift_variant
01 Pool	24	01 Pool_24 plate_17 well	NO22G01730	GATGTCGCTTCGTGAGACAG	Psbp domain-containing protein chloroplastic-like protein;Psbp domain-containing protein chloroplastic-like protein	chr22: 498746	GTC	G,GGTC,GCTC,GTTC	AO=1,1,5,3	DP=227	frameshift_variant
01 Pool	24	01 Pool_24 plate_19 well	NO02G05810	TGCGGCCAAGAAAGACACCG	Unknown protein	chr2: 1551457	C	CA	AO=5	DP=157	frameshift_variant
01 Pool	24	01 Pool_24 plate_21 well	NO06G03750	GAGTACCTCTTCTTGACCTG	Trna (Uracil-5-)-methyltransferase	chr6: 1035399	A	AG	AO=2	DP=188	frameshift_variant
01 Pool	24	01 Pool_24 plate_23 well	NO07G02680	ACTACAAGTATTCTCTCTCG	Abc1 family protein	chr7: 775276	AG	A,AAAG	AO=1,1	DP=190	frameshift_variant
01 Pool	24	01 Pool_24 plate_24 well	NO19G02210	CCATGAGAGAGTTTTACCCG	Unknown protein	chr19: 632181	AC	A,ACA	AO=3,2	DP=106	frameshift_variant
02 Pool	01	02 Pool_01 plate_01 well	NO04G03130	GCAGCCTTACTACCACCGCG	Transcription factor iiia	chr4: 856452	CG	C,CGG	AO=1,8	DP=186	frameshift_variant
02 Pool	01	02 Pool_01 plate_03 well	NO05G01420	GCAGACCAACTGCAGCTCCA	UPF0394 membrane protein PD_1893	chr5: 403208	ACGTAGAGCGAGAAAGGAGTTAGCAGACCAACTGCAGCT	A,ACGTAGAGCGAGAAAGGAGTTAGCAGACCAACTG,ACGTAGAGCGAGAAAGGAGTTAGCAGACCAACTGCAGCTT,ACGTAGAGCGAGAAAGGAGTTAGCAGACCAACTGCAGCTA,ACGTAGAGCGAGAAAGGAGTTAGAAGACCAACTGCAGCT,ACGTAGAGCGAGAAAGGAGTTAGTAGACCAACTGCAGCT	AO=1,1,1,2,1,1	DP=99	frameshift_variant
02 Pool	01	02 Pool_01 plate_06 well	NO04G03130	GCAGCCTTACTACCACCGCG	Transcription factor iiia	chr4: 856452	CG	C,CGG	AO=1,8	DP=186	frameshift_variant
02 Pool	01	02 Pool_01 plate_07 well	NO12G01140	GTTTTGGGGATAGACGAACA	Insulin-degrading enzyme-like 1, peroxisomal;Insulin-degrading enzyme-like 1, peroxisomal;Insulysin	chr12: 358703	GA	G	AO=3	DP=151	frameshift_variant
02 Pool	01	02 Pool_01 plate_08 well	NO14G03200	CGATCCCACGCCCTATTCGG	Mog1/PsbP/DUF1795, alpha/beta/alpha sandwich;Mog1/PsbP/DUF1795, alpha/beta/alpha sandwich;Mog1/PsbP/DUF1795, alpha/beta/alpha sandwich;Mog1/PsbP/DUF1795, alpha/beta/alpha sandwich	chr14: 959200	G	GT	AO=10	DP=177	frameshift_variant
02 Pool	01	02 Pool_01 plate_12 well	NO18G01270	GCGCCTTTCGATCATCCCTG	SNARE associated Golgi protein	chr18: 435517	A	AG	AO=10	DP=179	frameshift_variant
02 Pool	01	02 Pool_01 plate_15 well	NO05G02580	GTGGCGACGACAGGTTTCTG	Dimeric alpha-beta barrel	chr5: 679401	TCT	CT,TT,TCC	AO=1,1,1	DP=183	frameshift_variant
02 Pool	01	02 Pool_01 plate_16 well	NO17G02420	CGCCCAATCAGTGACCATCG	Unknown protein	chr17: 713818	A	AG	AO=3	DP=118	frameshift_variant
02 Pool	01	02 Pool_01 plate_17 well	NO06G02300	ACGCATTTGATAAGGATGGG	Dna mismatch repair protein	chr6: 669042	C	CCA	AO=7	DP=168	frameshift_variant
02 Pool	01	02 Pool_01 plate_18 well	NO29G00250	ATTACGTCGAGCATCAGCAA	Unknown protein;Unknown protein	chr29: 96134	TTGC	T,TT,TTGTC	AO=2,1,3	DP=116	frameshift_variant
02 Pool	01	02 Pool_01 plate_19 well	NO15G00820	AGAGGGCCAGCACATCATGG	Carbohydrate-binding family 9-like protein	chr15: 256766	A	ATTT	AO=2	DP=169	conservative_inframe_insertion
02 Pool	02	02 Pool_02 plate_02 well	NO21G00760	TCCAAGCATCAGCACTATCG	haloacid dehalogenase-like hydrolase family protein	chr21: 257517	G	GA	AO=1	DP=151	frameshift_variant
02 Pool	02	02 Pool_02 plate_02 well	NO16G02930	AGTGCTGCTCCTGAAGAACG	Unknown protein	chr16: 854039	G	GA	AO=13	DP=159	frameshift_variant
02 Pool	02	02 Pool_02 plate_03 well	NO07G01020	ATTACCATCATCATTTCCTG	Gcn5-related n-acetyltransferase	chr7: 331528	AG	A	AO=7	DP=132	frameshift_variant
02 Pool	02	02 Pool_02 plate_04 well	NO10G02930	AGGGCCAGGTGTCATGACCA	Unknown protein	chr10: 814091	TGGT	GGGG,TGGTT,TGGC	AO=1,1,6	DP=179	frameshift_variant
02 Pool	02	02 Pool_02 plate_05 well	NO07G01020	ATTACCATCATCATTTCCTG	Gcn5-related n-acetyltransferase	chr7: 331528	AG	A	AO=7	DP=132	frameshift_variant
02 Pool	02	02 Pool_02 plate_06 well	NO09G03500	GAAATTGATGGAGGACACGA	Unknown protein	chr9: 1003173	TGGAGGACACGAG	T,TGGAGGACCGAG,TGGAGGACAGAG,TGTAGGACACGAG	AO=1,1,1,1	DP=153	frameshift_variant
02 Pool	02	02 Pool_02 plate_06 well	NO01G03530	AGGAAGGTTTAATTACCCCG	Nadph--cytochrome p450 reductase	chr1: 920923	CC	C,CA	AO=1,1	DP=177	frameshift_variant
02 Pool	02	02 Pool_02 plate_07 well	NO05G05010	TTTTGAGATCGATAGCAATG	Eukaryotic protein of unknown function (DUF872)	chr5: 1307935	C	CA	AO=1	DP=145	frameshift_variant
02 Pool	02	02 Pool_02 plate_08 well	NO15G02110	TAAAAGCACCACCAGCCGAG	Unknown protein	chr15: 594265	CGA	GA,C	AO=2,1	DP=153	frameshift_variant
02 Pool	02	02 Pool_02 plate_09 well	NO09G03550	CAACTATCGCGGATACACCA	Transmembrane protein;Transmembrane protein;Transmembrane protein;Transmembrane protein;Transmembrane protein	chr9: 1017380	GGT	G	AO=1	DP=170	frameshift_variant
02 Pool	02	02 Pool_02 plate_10 well	NO06G02330	GTAGCCAATAACACCGCCCA	Unknown protein	chr6: 673660	CGTGGGCG	C,CTTGGGCG	AO=5,1	DP=195	frameshift_variant
02 Pool	02	02 Pool_02 plate_11 well	NO28G01450	GTTGCTGCTGGCATTGACTG	Tetratricopeptide repeat (TPR)-like superfamily protein	chr28: 456008	G	GTT	AO=2	DP=139	frameshift_variant
02 Pool	02	02 Pool_02 plate_12 well	NO15G02110	TAAAAGCACCACCAGCCGAG	Unknown protein	chr15: 594265	CGA	GA,C	AO=2,1	DP=153	frameshift_variant
02 Pool	02	02 Pool_02 plate_13 well	NO11G01060	ATGAGGACGATGTCTCTGCG	Vacuolar sorting protein 35	chr11: 397978	C	CAC,CA,CAG	AO=1,1,1	DP=173	frameshift_variant
02 Pool	02	02 Pool_02 plate_15 well	NO07G00210	TACGACAACAGACCGCCCAA	Unknown protein	chr7: 94292	C	CA	AO=1	DP=124	frameshift_variant
02 Pool	02	02 Pool_02 plate_16 well	NO03G03590	TGGAGGTGGCATTCTCACTG	Mitochodrial transcription termination factor	chr3: 1067262	A	G	AO=2	DP=157	missense_variant
02 Pool	02	02 Pool_02 plate_17 well	NO05G02240	ACAAGTACAAGAGAAAACAA	High mobility group protein b3;High mobility group protein b3	chr5: 596877	CTTTG	C,CTTTGT	AO=3,1	DP=160	frameshift_variant
02 Pool	02	02 Pool_02 plate_19 well	NO15G00840	AGTTGTGGGAGAAAAACGAG	Major facilitator superfamily mfs_1	chr15: 262916	CG	C,CGG	AO=2,2	DP=160	frameshift_variant
02 Pool	02	02 Pool_02 plate_23 well	NO16G02930	AGTGCTGCTCCTGAAGAACG	Unknown protein	chr16: 854039	G	GA	AO=13	DP=159	frameshift_variant
02 Pool	02	02 Pool_02 plate_24 well	NO10G00350	GCTCTTCCAAGTCAGCACCG	Unknown protein	chr10: 123060	CGG	GG,CGGTTT,GGG	AO=1,3,1	DP=96	frameshift_variant
02 Pool	02	02 Pool_02 plate_02 well	NO28G01410	TTCCACTCCACATTTCCACG	Unknown protein	chr28: 442087	C	T	AO=2	DP=171	missense_variant
02 Pool	03	02 Pool_03 plate_01 well	NO05G02820	TATCTCGAAGGGATATGGAA	Calmodulin binding protein;Calmodulin binding protein	chr5: 738668	CCCCCCACCCTTC	CCCCCCACCCTT,CCCCCACCCTTC,TCCCCCACCCTTC	AO=3,1,1	DP=154	frameshift_variant
02 Pool	03	02 Pool_03 plate_03 well	NO07G01700	GTAGAAGTGAACTTGCCTCG	Unknown protein	chr7: 513422	TTGCCT	T,TTGCT,TTGC,TTGCCCT,TTGCCAT,TTGCCGT,TTGCCTT,TTGCCTTT	AO=1,20,4,1,1,7,1,1	DP=199	frameshift_variant
02 Pool	03	02 Pool_03 plate_05 well	NO20G00540	GAAACGCAAGAAATCAACGT	Unknown protein	chr20: 185284	AC	A,AAC	AO=7,1	DP=200	frameshift_variant
02 Pool	03	02 Pool_03 plate_06 well	NO07G01700	GTAGAAGTGAACTTGCCTCG	Unknown protein	chr7: 513422	TTGCCT	T,TTGCT,TTGC,TTGCCCT,TTGCCAT,TTGCCGT,TTGCCTT,TTGCCTTT	AO=1,20,4,1,1,7,1,1	DP=199	frameshift_variant
02 Pool	03	02 Pool_03 plate_09 well	NO07G01700	GTAGAAGTGAACTTGCCTCG	Unknown protein	chr7: 513422	TTGCCT	T,TTGCT,TTGC,TTGCCCT,TTGCCAT,TTGCCGT,TTGCCTT,TTGCCTTT	AO=1,20,4,1,1,7,1,1	DP=199	frameshift_variant
02 Pool	03	02 Pool_03 plate_11 well	NO07G01700	GTAGAAGTGAACTTGCCTCG	Unknown protein	chr7: 513422	TTGCCT	T,TTGCT,TTGC,TTGCCCT,TTGCCAT,TTGCCGT,TTGCCTT,TTGCCTTT	AO=1,20,4,1,1,7,1,1	DP=199	frameshift_variant
02 Pool	03	02 Pool_03 plate_13 well	NO08G01140	CTTGCCGTCCGGCTACCGAG	Heat shock protein hsp20	chr8: 359019	AC	A	AO=7	DP=180	frameshift_variant
02 Pool	03	02 Pool_03 plate_14 well	NO03G02190	GAATCTTCTTCGCACCTCGA	Unknown protein	chr3: 649529	C	CG	AO=1	DP=203	frameshift_variant
02 Pool	03	02 Pool_03 plate_14 well	NO07G01700	GTAGAAGTGAACTTGCCTCG	Unknown protein	chr7: 513422	TTGCCT	T,TTGCT,TTGC,TTGCCCT,TTGCCAT,TTGCCGT,TTGCCTT,TTGCCTTT	AO=1,20,4,1,1,7,1,1	DP=199	frameshift_variant
02 Pool	03	02 Pool_03 plate_18 well	NO28G00920	AAATTTCGAAGAGGCAGACG	Bulb-type lectin domain protein	chr28: 302858	C	T	AO=2	DP=171	missense_variant
02 Pool	03	02 Pool_03 plate_23 well	NO07G01700	GTAGAAGTGAACTTGCCTCG	Unknown protein	chr7: 513422	TTGCCT	T,TTGCT,TTGC,TTGCCCT,TTGCCAT,TTGCCGT,TTGCCTT,TTGCCTTT	AO=1,20,4,1,1,7,1,1	DP=199	frameshift_variant
02 Pool	03	02 Pool_03 plate_24 well	NO07G01700	GTAGAAGTGAACTTGCCTCG	Unknown protein	chr7: 513422	TTGCCT	T,TTGCT,TTGC,TTGCCCT,TTGCCAT,TTGCCGT,TTGCCTT,TTGCCTTT	AO=1,20,4,1,1,7,1,1	DP=199	frameshift_variant
02 Pool	03	02 Pool_03 plate_03 well	NO20G01290	CAACGCTCGGAGGCTCAATG	Basic-leucine zipper domain protein	chr20: 388716	A	G	AO=2	DP=210	missense_variant
02 Pool	04	02 Pool_04 plate_01 well	NO19G02620	AGGCGAGCAGAAATTTACCG	ATP-binding cassette sub-family D member 3	chr19: 788156	G	GA	AO=1	DP=209	frameshift_variant
02 Pool	04	02 Pool_04 plate_01 well	NO06G02860	CTGGTGGAGAAGCAGAAACG	Ubiquinone biosynthesis protein coq7;Ubiquinone biosynthesis protein coq7	chr6: 821243	GA	G,CA	AO=1,1	DP=182	frameshift_variant
02 Pool	04	02 Pool_04 plate_02 well	NO06G02860	CTGGTGGAGAAGCAGAAACG	Ubiquinone biosynthesis protein coq7;Ubiquinone biosynthesis protein coq7	chr6: 821243	GA	G,CA	AO=1,1	DP=182	frameshift_variant
02 Pool	04	02 Pool_04 plate_03 well	NO06G02860	CTGGTGGAGAAGCAGAAACG	Ubiquinone biosynthesis protein coq7;Ubiquinone biosynthesis protein coq7	chr6: 821243	GA	G,CA	AO=1,1	DP=182	frameshift_variant
02 Pool	04	02 Pool_04 plate_04 well	NO06G02860	CTGGTGGAGAAGCAGAAACG	Ubiquinone biosynthesis protein coq7;Ubiquinone biosynthesis protein coq7	chr6: 821243	GA	G,CA	AO=1,1	DP=182	frameshift_variant
02 Pool	04	02 Pool_04 plate_04 well	NO13G03460	GCGTGCTGGATAGAAGAGAG	Unknown protein;Unknown protein;Unknown protein;Unknown protein;Unknown protein;Unknown protein	chr13: 1038898	CCT	C	AO=8	DP=162	frameshift_variant
02 Pool	04	02 Pool_04 plate_06 well	NO13G03460	GCGTGCTGGATAGAAGAGAG	Unknown protein;Unknown protein;Unknown protein;Unknown protein;Unknown protein;Unknown protein	chr13: 1038898	CCT	C	AO=8	DP=162	frameshift_variant
02 Pool	04	02 Pool_04 plate_06 well	NO02G01780	ATCAACTAAGTCTACCCAGG	Qa-syp4 tlg2p syntaxin 16-type	chr2: 521744	C	CCT	AO=1	DP=183	frameshift_variant&stop_gained
02 Pool	04	02 Pool_04 plate_06 well	NO06G02860	CTGGTGGAGAAGCAGAAACG	Ubiquinone biosynthesis protein coq7;Ubiquinone biosynthesis protein coq7	chr6: 821243	GA	G,CA	AO=1,1	DP=182	frameshift_variant
02 Pool	04	02 Pool_04 plate_08 well	NO06G02860	CTGGTGGAGAAGCAGAAACG	Ubiquinone biosynthesis protein coq7;Ubiquinone biosynthesis protein coq7	chr6: 821243	GA	G,CA	AO=1,1	DP=182	frameshift_variant
02 Pool	04	02 Pool_04 plate_10 well	NO06G02860	CTGGTGGAGAAGCAGAAACG	Ubiquinone biosynthesis protein coq7;Ubiquinone biosynthesis protein coq7	chr6: 821243	GA	G,CA	AO=1,1	DP=182	frameshift_variant
02 Pool	04	02 Pool_04 plate_11 well	NO06G02860	CTGGTGGAGAAGCAGAAACG	Ubiquinone biosynthesis protein coq7;Ubiquinone biosynthesis protein coq7	chr6: 821243	GA	G,CA	AO=1,1	DP=182	frameshift_variant
02 Pool	04	02 Pool_04 plate_13 well	NO06G02860	CTGGTGGAGAAGCAGAAACG	Ubiquinone biosynthesis protein coq7;Ubiquinone biosynthesis protein coq7	chr6: 821243	GA	G,CA	AO=1,1	DP=182	frameshift_variant
02 Pool	04	02 Pool_04 plate_14 well	NO05G02720	GCCAAGATTCTGGCACAAAG	Unknown protein	chr5: 719597	T	TG	AO=1	DP=154	frameshift_variant
02 Pool	04	02 Pool_04 plate_14 well	NO06G02860	CTGGTGGAGAAGCAGAAACG	Ubiquinone biosynthesis protein coq7;Ubiquinone biosynthesis protein coq7	chr6: 821243	GA	G,CA	AO=1,1	DP=182	frameshift_variant
02 Pool	04	02 Pool_04 plate_15 well	NO19G02620	AGGCGAGCAGAAATTTACCG	ATP-binding cassette sub-family D member 3	chr19: 788156	G	GA	AO=1	DP=209	frameshift_variant
02 Pool	04	02 Pool_04 plate_16 well	NO04G03970	CAAACGCAAGCTCAACATGG	Protein kinase, ATP binding site	chr4: 1067174	A	ATG	AO=1	DP=152	frameshift_variant
02 Pool	04	02 Pool_04 plate_18 well	NO06G02860	CTGGTGGAGAAGCAGAAACG	Ubiquinone biosynthesis protein coq7;Ubiquinone biosynthesis protein coq7	chr6: 821243	GA	G,CA	AO=1,1	DP=182	frameshift_variant
02 Pool	04	02 Pool_04 plate_19 well	NO02G01780	ATCAACTAAGTCTACCCAGG	Qa-syp4 tlg2p syntaxin 16-type	chr2: 521744	C	CCT	AO=1	DP=183	frameshift_variant&stop_gained
02 Pool	04	02 Pool_04 plate_20 well	NO20G00320	GAGCGATTGGCAACGTACCG	Programmed cell death protein 4	chr20: 113165	GGT	G,GG,GGAT	AO=1,1,2	DP=192	frameshift_variant
02 Pool	04	02 Pool_04 plate_20 well	NO06G02860	CTGGTGGAGAAGCAGAAACG	Ubiquinone biosynthesis protein coq7;Ubiquinone biosynthesis protein coq7	chr6: 821243	GA	G,CA	AO=1,1	DP=182	frameshift_variant
02 Pool	04	02 Pool_04 plate_21 well	NO06G02860	CTGGTGGAGAAGCAGAAACG	Ubiquinone biosynthesis protein coq7;Ubiquinone biosynthesis protein coq7	chr6: 821243	GA	G,CA	AO=1,1	DP=182	frameshift_variant
02 Pool	04	02 Pool_04 plate_22 well	NO06G02860	CTGGTGGAGAAGCAGAAACG	Ubiquinone biosynthesis protein coq7;Ubiquinone biosynthesis protein coq7	chr6: 821243	GA	G,CA	AO=1,1	DP=182	frameshift_variant
02 Pool	04	02 Pool_04 plate_23 well	NO20G00170	AGTCTGAGTACGATCGACCG	Pectin acetylesterase 8;Pectin acetylesterase 5	chr20: 65497	CCG	GCCG,CCA	AO=9,1	DP=171	frameshift_variant
02 Pool	04	02 Pool_04 plate_23 well	NO06G02860	CTGGTGGAGAAGCAGAAACG	Ubiquinone biosynthesis protein coq7;Ubiquinone biosynthesis protein coq7	chr6: 821243	GA	G,CA	AO=1,1	DP=182	frameshift_variant
02 Pool	04	02 Pool_04 plate_24 well	NO06G02860	CTGGTGGAGAAGCAGAAACG	Ubiquinone biosynthesis protein coq7;Ubiquinone biosynthesis protein coq7	chr6: 821243	GA	G,CA	AO=1,1	DP=182	frameshift_variant
02 Pool	05	02 Pool_05 plate_01 well	NO10G00430	GTGGATATGCTGGACAAACG	Unknown protein	chr10: 148468	TGTC	GTC,TGTT	AO=1,1	DP=27	frameshift_variant
02 Pool	05	02 Pool_05 plate_02 well	NO05G02490	TACTCCGGATAACGACGACG	Protein kinase, catalytic domain protein	chr5: 663599	CTCG	C	AO=4	DP=134	disruptive_inframe_deletion
02 Pool	05	02 Pool_05 plate_02 well	NO10G00430	GTGGATATGCTGGACAAACG	Unknown protein	chr10: 148468	TGTC	GTC,TGTT	AO=1,1	DP=27	frameshift_variant
02 Pool	05	02 Pool_05 plate_03 well	NO10G00430	GTGGATATGCTGGACAAACG	Unknown protein	chr10: 148468	TGTC	GTC,TGTT	AO=1,1	DP=27	frameshift_variant
02 Pool	05	02 Pool_05 plate_04 well	NO10G00430	GTGGATATGCTGGACAAACG	Unknown protein	chr10: 148468	TGTC	GTC,TGTT	AO=1,1	DP=27	frameshift_variant
02 Pool	05	02 Pool_05 plate_05 well	NO10G00430	GTGGATATGCTGGACAAACG	Unknown protein	chr10: 148468	TGTC	GTC,TGTT	AO=1,1	DP=27	frameshift_variant
02 Pool	05	02 Pool_05 plate_05 well	NO10G01580	AGGCACGGTTAGTACTGCAA	Unknown protein	chr10: 452721	GC	G,GGC	AO=1,1	DP=153	frameshift_variant
02 Pool	05	02 Pool_05 plate_06 well	NO10G00430	GTGGATATGCTGGACAAACG	Unknown protein	chr10: 148468	TGTC	GTC,TGTT	AO=1,1	DP=27	frameshift_variant
02 Pool	05	02 Pool_05 plate_07 well	NO13G02050	CTCATTGAAAAAATGGATGG	Unknown protein	chr13: 582713	TGGAT	T,TGGA	AO=1,2	DP=143	frameshift_variant
02 Pool	05	02 Pool_05 plate_08 well	NO26G01440	GATGTACCGATTGTTGCTTG	Ppr repeat-containing protein	chr26: 465073	GTTGC	G,GTTGCC,GTTTC	AO=2,1,1	DP=164	frameshift_variant
02 Pool	05	02 Pool_05 plate_08 well	NO10G00430	GTGGATATGCTGGACAAACG	Unknown protein	chr10: 148468	TGTC	GTC,TGTT	AO=1,1	DP=27	frameshift_variant
02 Pool	05	02 Pool_05 plate_09 well	NO08G02820	AGGTGGGGGTAATGAAGTCG	Unknown protein	chr8: 794394	GA	G,GAG	AO=1,1	DP=181	frameshift_variant
02 Pool	05	02 Pool_05 plate_09 well	NO09G00920	GCTAGGGCGGAAGTTTATGC	Dnaj subfamily b member 12;Dnaj subfamily b member 12;Dnaj subfamily b member 12	chr9: 320291	CCCGCATAAACTT	C,CCCGCAAACTT,CCCGCACTAAACTT	AO=1,1,1	DP=139	frameshift_variant
02 Pool	05	02 Pool_05 plate_09 well	NO10G00430	GTGGATATGCTGGACAAACG	Unknown protein	chr10: 148468	TGTC	GTC,TGTT	AO=1,1	DP=27	frameshift_variant
02 Pool	05	02 Pool_05 plate_10 well	NO17G01190	AAATGTGCTCAGGATTGCCA	Unknown protein	chr17: 375262	G	GA	AO=2	DP=156	frameshift_variant
02 Pool	05	02 Pool_05 plate_10 well	NO10G00430	GTGGATATGCTGGACAAACG	Unknown protein	chr10: 148468	TGTC	GTC,TGTT	AO=1,1	DP=27	frameshift_variant
02 Pool	05	02 Pool_05 plate_12 well	NO01G00450	CTTCCGAGCCGTCCGCAACG	4-methyl-5(B-hydroxyethyl)-thiazole monophosphate biosynthesis	chr1: 123458	C	CA	AO=1	DP=154	frameshift_variant
02 Pool	05	02 Pool_05 plate_12 well	NO10G00430	GTGGATATGCTGGACAAACG	Unknown protein	chr10: 148468	TGTC	GTC,TGTT	AO=1,1	DP=27	frameshift_variant
02 Pool	05	02 Pool_05 plate_13 well	NO18G00160	GAGATTGGAGAGCAATCCTG	Unknown protein	chr18: 67130	AGG	AG,A	AO=2,1	DP=247	frameshift_variant
02 Pool	05	02 Pool_05 plate_13 well	NO10G00430	GTGGATATGCTGGACAAACG	Unknown protein	chr10: 148468	TGTC	GTC,TGTT	AO=1,1	DP=27	frameshift_variant
02 Pool	05	02 Pool_05 plate_14 well	NO10G00430	GTGGATATGCTGGACAAACG	Unknown protein	chr10: 148468	TGTC	GTC,TGTT	AO=1,1	DP=27	frameshift_variant
02 Pool	05	02 Pool_05 plate_15 well	NO15G02020	GTTCTTGATCAGACTCGTCG	Rad54-like protein	chr15: 564070	CCGA	C	AO=2	DP=125	disruptive_inframe_deletion
02 Pool	05	02 Pool_05 plate_15 well	NO10G00430	GTGGATATGCTGGACAAACG	Unknown protein	chr10: 148468	TGTC	GTC,TGTT	AO=1,1	DP=27	frameshift_variant
02 Pool	05	02 Pool_05 plate_16 well	NO17G01350	AAGATCACCAATGCAGTGCA	Unknown protein	chr17: 415248	A	AGT	AO=1	DP=151	frameshift_variant
02 Pool	05	02 Pool_05 plate_16 well	NO10G00430	GTGGATATGCTGGACAAACG	Unknown protein	chr10: 148468	TGTC	GTC,TGTT	AO=1,1	DP=27	frameshift_variant
02 Pool	05	02 Pool_05 plate_17 well	NO10G00430	GTGGATATGCTGGACAAACG	Unknown protein	chr10: 148468	TGTC	GTC,TGTT	AO=1,1	DP=27	frameshift_variant
02 Pool	05	02 Pool_05 plate_17 well	NO13G00430	TGGCCAGAGGTCGACGACGG	Unknown protein	chr13: 145471	GA	GTT,A	AO=1,2	DP=157	frameshift_variant
02 Pool	05	02 Pool_05 plate_18 well	NO16G00330	GACCTGTGTGCCTTTCCACG	Protein kinase superfamily protein	chr16: 122183	TG	T	AO=3	DP=61	frameshift_variant
02 Pool	05	02 Pool_05 plate_18 well	NO26G01790	CACAGGCGACATTTACCGGG	EXS (ERD1/XPR1/SYG1) family protein	chr26: 598278	C	CG	AO=3	DP=151	frameshift_variant
02 Pool	05	02 Pool_05 plate_19 well	NO10G00430	GTGGATATGCTGGACAAACG	Unknown protein	chr10: 148468	TGTC	GTC,TGTT	AO=1,1	DP=27	frameshift_variant
02 Pool	05	02 Pool_05 plate_20 well	NO05G03030	TGGTCTTAAGATATGCTGTG	E3 ubiquitin-protein ligase	chr5: 789039	C	CT,CTT	AO=1,1	DP=140	frameshift_variant
02 Pool	05	02 Pool_05 plate_20 well	NO10G00430	GTGGATATGCTGGACAAACG	Unknown protein	chr10: 148468	TGTC	GTC,TGTT	AO=1,1	DP=27	frameshift_variant
02 Pool	05	02 Pool_05 plate_21 well	NO10G00430	GTGGATATGCTGGACAAACG	Unknown protein	chr10: 148468	TGTC	GTC,TGTT	AO=1,1	DP=27	frameshift_variant
02 Pool	05	02 Pool_05 plate_22 well	NO10G00430	GTGGATATGCTGGACAAACG	Unknown protein	chr10: 148468	TGTC	GTC,TGTT	AO=1,1	DP=27	frameshift_variant
02 Pool	05	02 Pool_05 plate_22 well	NO26G01790	CACAGGCGACATTTACCGGG	EXS (ERD1/XPR1/SYG1) family protein	chr26: 598278	C	CG	AO=3	DP=151	frameshift_variant
02 Pool	05	02 Pool_05 plate_23 well	NO10G00430	GTGGATATGCTGGACAAACG	Unknown protein	chr10: 148468	TGTC	GTC,TGTT	AO=1,1	DP=27	frameshift_variant
02 Pool	05	02 Pool_05 plate_24 well	NO10G00430	GTGGATATGCTGGACAAACG	Unknown protein	chr10: 148468	TGTC	GTC,TGTT	AO=1,1	DP=27	frameshift_variant
02 Pool	06	02 Pool_06 plate_02 well	NO01G03530	AGGAAGGTTTAATTACCCCG	Nadph--cytochrome p450 reductase	chr1: 920923	C	A	AO=8	DP=141	synonymous_variant
02 Pool	06	02 Pool_06 plate_03 well	NO20G01290	CAACGCTCGGAGGCTCAATG	Basic-leucine zipper domain protein	chr20: 388716	A	AC	AO=5	DP=136	frameshift_variant
02 Pool	06	02 Pool_06 plate_04 well	NO07G04250	GTCCACGACGCTCGTTAACG	Unknown protein	chr7: 1197475	TA	T,TAA	AO=2,1	DP=136	frameshift_variant
02 Pool	06	02 Pool_06 plate_05 well	NO26G01790	CACAGGCGACATTTACCGGG	EXS (ERD1/XPR1/SYG1) family protein	chr26: 598278	CGGGGGGGAAAGG	GGGGGGGAAAGG,CGGGGGGAAAGG,CGGGGGGGGAAGG,CGGGGGGGAAAGA,CGGGGTGGAAAGG	AO=1,2,1,2,1	DP=120	frameshift_variant
02 Pool	06	02 Pool_06 plate_06 well	NO13G00280	TGGCAGGGTGAAGATCGTCG	Ubiquitin thioesterase otub1	chr13: 102665	ATCG	A,ATCGATCA	AO=6,1	DP=138	frameshift_variant
02 Pool	06	02 Pool_06 plate_07 well	NO10G03790	GGCAGTGAAAGTGCATTTGG	Unknown protein	chr10: 1097982	A	AC	AO=1	DP=111	frameshift_variant
02 Pool	06	02 Pool_06 plate_08 well	NO13G02190	TTGTGAAAGATGGAATACGA	Sam-dependent methyltransferase	chr13: 616816	T	TA	AO=5	DP=164	frameshift_variant
02 Pool	06	02 Pool_06 plate_08 well	NO16G02320	GATGAAAAGAGTAAAGACCA	Unknown protein	chr16: 670730	A	AA,AT	AO=2,1	DP=117	frameshift_variant
02 Pool	06	02 Pool_06 plate_11 well	NO24G01490	GTGGTCACAAGAAGTAGTTG	Zn(2)-C6 fungal-type DNA-binding domain protein	chr24: 396494	AGTTGTG	A	AO=1	DP=133	disruptive_inframe_deletion
02 Pool	06	02 Pool_06 plate_12 well	NO16G02320	GATGAAAAGAGTAAAGACCA	Unknown protein	chr16: 670730	A	AA,AT	AO=2,1	DP=117	frameshift_variant
02 Pool	06	02 Pool_06 plate_15 well	NO02G04500	AGCCATTACAGCGCTGACAG	Phosphoinositol transporter;Phosphoinositol transporter	chr2: 1220494	G	GT	AO=3	DP=98	frameshift_variant
02 Pool	06	02 Pool_06 plate_17 well	NO23G00330	TAGAGACAGCAACAAAGGGG	GMP reductase	chr23: 157751	TC	T	AO=1	DP=66	frameshift_variant
02 Pool	06	02 Pool_06 plate_18 well	NO26G01790	CACAGGCGACATTTACCGGG	EXS (ERD1/XPR1/SYG1) family protein	chr26: 598278	CGGGGGGGAAAGG	GGGGGGGAAAGG,CGGGGGGAAAGG,CGGGGGGGGAAGG,CGGGGGGGAAAGA,CGGGGTGGAAAGG	AO=1,2,1,2,1	DP=120	frameshift_variant
02 Pool	06	02 Pool_06 plate_18 well	NO24G01490	GTGGTCACAAGAAGTAGTTG	Zn(2)-C6 fungal-type DNA-binding domain protein	chr24: 396494	AGTTGTG	A	AO=1	DP=133	disruptive_inframe_deletion
02 Pool	06	02 Pool_06 plate_19 well	NO18G00050	GTTCTTCTATAGCTGCTCAA	Unknown protein;Unknown protein;Unknown protein;Alpha-(1,6)-fucosyltransferase	chr18: 18242	GAGC	G	AO=11	DP=176	disruptive_inframe_deletion
02 Pool	06	02 Pool_06 plate_21 well	NO02G04910	TGTCCTGGGGATACCGAACG	Saccharopine dehydrogenase	chr2: 1322176	CCGAA	C	AO=6	DP=121	frameshift_variant
02 Pool	06	02 Pool_06 plate_21 well	NO24G01490	GTGGTCACAAGAAGTAGTTG	Zn(2)-C6 fungal-type DNA-binding domain protein	chr24: 396494	AGTTGTG	A	AO=1	DP=133	disruptive_inframe_deletion
02 Pool	06	02 Pool_06 plate_22 well	NO22G00500	AGAGTGTCTTTCACGAGAGC	Dynein light chain roadblock-type 1	chr22: 170404	CGA	C	AO=1	DP=120	frameshift_variant
02 Pool	06	02 Pool_06 plate_22 well	NO26G01790	CACAGGCGACATTTACCGGG	EXS (ERD1/XPR1/SYG1) family protein	chr26: 598278	CGGGGGGGAAAGG	GGGGGGGAAAGG,CGGGGGGAAAGG,CGGGGGGGGAAGG,CGGGGGGGAAAGA,CGGGGTGGAAAGG	AO=1,2,1,2,1	DP=120	frameshift_variant
02 Pool	07	02 Pool_07 plate_02 well	NO09G00670	ACACGAGGACAAATCCATCG	Unknown protein	chr9: 245887	G	GA	AO=2	DP=159	frameshift_variant
02 Pool	07	02 Pool_07 plate_02 well	NO07G01800	TTATCGAATCTCGAAAGTGG	Always early protein 3	chr7: 538500	A	AG	AO=2	DP=193	frameshift_variant
02 Pool	07	02 Pool_07 plate_03 well	NO28G00440	AGGAAGGGCGATCTTGTCGA	Queuine tRNA-ribosyltransferase accessory subunit 2	chr28: 165518	GT	G	AO=1	DP=108	frameshift_variant
02 Pool	07	02 Pool_07 plate_07 well	NO07G00240	TTGCGCACCCCTCCCATCCG	Unknown protein	chr7: 102978	A	AT	AO=1	DP=132	frameshift_variant
02 Pool	07	02 Pool_07 plate_09 well	NO07G01800	TTATCGAATCTCGAAAGTGG	Always early protein 3	chr7: 538500	A	AG	AO=2	DP=193	frameshift_variant
02 Pool	07	02 Pool_07 plate_10 well	NO09G03220	CATTCGCGATGGCACCACCG	Sulfite exporter TauE/SafE family protein	chr9: 933643	CGGT	C,CGGAT,CGGTT	AO=1,1,3	DP=150	frameshift_variant
02 Pool	07	02 Pool_07 plate_11 well	NO12G01170	TAAGACTCCCAAGCAACCAG	Aldo keto reductase	chr12: 368851	TG	T,TGGA	AO=4,2	DP=188	frameshift_variant
02 Pool	07	02 Pool_07 plate_13 well	NO09G03770	GATGCTGGGAATGGTCATCG	Unknown protein	chr9: 1083220	A	AC	AO=3	DP=112	frameshift_variant
02 Pool	07	02 Pool_07 plate_17 well	NO16G01990	TCGCTGTGAAGATGAGACTG	Unknown protein	chr16: 585587	AC	A,GC	AO=1,1	DP=137	frameshift_variant
02 Pool	07	02 Pool_07 plate_18 well	NO13G02220	ATACGAAGATCTTGCCAACG	Unknown protein	chr13: 620654	GT	G	AO=5	DP=141	frameshift_variant
02 Pool	07	02 Pool_07 plate_19 well	NO27G00990	CTTGTACATCTCAATCACAT	Unknown protein	chr27: 325410	A	AG	AO=6	DP=138	frameshift_variant
02 Pool	07	02 Pool_07 plate_20 well	NO07G00240	TTGCGCACCCCTCCCATCCG	Unknown protein	chr7: 102978	A	AT	AO=1	DP=132	frameshift_variant
02 Pool	07	02 Pool_07 plate_20 well	NO07G01800	TTATCGAATCTCGAAAGTGG	Always early protein 3	chr7: 538500	A	AG	AO=2	DP=193	frameshift_variant
02 Pool	07	02 Pool_07 plate_21 well	NO08G02460	GGTGGAATCAGCAAGCAAGG	Mitochondrial carrier	chr8: 711475	C	CT	AO=1	DP=124	frameshift_variant
02 Pool	07	02 Pool_07 plate_23 well	NO04G02590	CATTGATACAGGTGACAAAG	Cap-specific mRNA (nucleoside-2'-O-)-methyltransferase 1	chr4: 691933	C	CT	AO=2	DP=153	frameshift_variant
02 Pool	08	02 Pool_08 plate_03 well	NO24G02060	TCGCAAGTTATCTTCCCACG	Generic methyltransferase	chr24: 548689	TCCCA	CCCCC,TCCA,TCA,TCCCCA,TCCCGA	AO=1,9,2,3,1	DP=168	frameshift_variant
02 Pool	08	02 Pool_08 plate_05 well	NO12G02560	ATTTGAGGGAGTATTACGAG	Phosphatidylinositol 4-kinase	chr12: 727996	A	AC	AO=1	DP=186	frameshift_variant
02 Pool	08	02 Pool_08 plate_06 well	NO23G01250	TGAGCATTAAGGGATTGGTG	UPF0301 protein SRM_00577	chr23: 448819	TG	T	AO=5	DP=195	frameshift_variant
02 Pool	08	02 Pool_08 plate_07 well	NO01G00620	CACACCTTTCGAGAGCGGCA	Unknown protein	chr1: 163742	C	CG	AO=7	DP=140	frameshift_variant
02 Pool	08	02 Pool_08 plate_08 well	NO01G04120	CGAAGGCGGATATCAACAGG	Signal recognition particle-docking protein FtsY	chr1: 1100602	CTGT	C	AO=2	DP=117	conservative_inframe_deletion
02 Pool	08	02 Pool_08 plate_11 well	NO06G01920	GAAGATGCTTGCAACTACCG	Arylsulfatase j	chr6: 576590	G	GA	AO=4	DP=114	frameshift_variant
02 Pool	08	02 Pool_08 plate_12 well	NO01G04120	CGAAGGCGGATATCAACAGG	Signal recognition particle-docking protein FtsY	chr1: 1100602	CTGT	C	AO=2	DP=117	conservative_inframe_deletion
02 Pool	08	02 Pool_08 plate_13 well	NO02G04160	TGCATTGTGAAGGTGAACGT	transducin family protein / WD-40 repeat family protein	chr2: 1136424	G	GC	AO=3	DP=129	frameshift_variant
02 Pool	08	02 Pool_08 plate_14 well	NO25G01630	ATGACGTTCCGGTGACAGGA	Carboxyl-terminal protease	chr25: 457342	CCGGTGACAGGACGGT	C,CCGGTGACAAGGACGGT	AO=1,1	DP=97	frameshift_variant
02 Pool	08	02 Pool_08 plate_16 well	NO10G01390	AGGATTGGAGGATATCTCAG	Unknown protein	chr10: 407174	ATC	A	AO=7	DP=197	frameshift_variant
02 Pool	08	02 Pool_08 plate_19 well	NO13G00250	AAAGATAACGACGTCACCTG	Zn(2)-C6 fungal-type DNA-binding domain protein	chr13: 94362	GGT	G	AO=7	DP=163	frameshift_variant
02 Pool	08	02 Pool_08 plate_20 well	NO03G03270	CAACATTGTGTAACCACCTG	Kelch-like protein 17	chr3: 974056	AG	A	AO=1	DP=161	frameshift_variant
02 Pool	08	02 Pool_08 plate_22 well	NO10G02210	TTTCGCGATTGGGTACAAGG	Transmembrane 9 superfamily member	chr10: 608132	GT	TGT,GG	AO=2,1	DP=176	frameshift_variant
02 Pool	09	02 Pool_09 plate_01 well	NO13G00840	GGAAGGCCGGAGCTATTGTG	Unknown protein	chr13: 278152	C	CA	AO=4	DP=154	frameshift_variant
02 Pool	09	02 Pool_09 plate_02 well	NO27G00520	CCATACGTAGAGCTTCGAGT	Unknown protein	chr27: 193410	CGA	C	AO=1	DP=174	frameshift_variant
02 Pool	09	02 Pool_09 plate_03 well	NO03G00090	GGACGAGCGCCATAGGTTGG	Unknown protein	chr3: 27829	A	G	AO=2	DP=187	missense_variant
02 Pool	09	02 Pool_09 plate_05 well	NO05G00920	GCGGTATGGTCATAAACAAG	Unknown protein	chr5: 283309	CTTGT	GTTG,CTTG	AO=1,6	DP=132	frameshift_variant&missense_variant
02 Pool	09	02 Pool_09 plate_06 well	NO01G01960	GAATTACCAAGAAATGCACG	Protein kinase c binding protein;Protein kinase c binding protein	chr1: 496018	C	T	AO=2	DP=167	missense_variant
02 Pool	09	02 Pool_09 plate_08 well	NO09G00750	CTCCAGTGGCTTCAGCACAG	RING/U-box superfamily protein	chr9: 270322	CTG	C	AO=5	DP=171	frameshift_variant
02 Pool	09	02 Pool_09 plate_09 well	NO01G01960	GAATTACCAAGAAATGCACG	Protein kinase c binding protein;Protein kinase c binding protein	chr1: 496018	C	T	AO=2	DP=167	missense_variant
02 Pool	09	02 Pool_09 plate_12 well	NO10G01330	GTCATCACCGTTGTAGACGA	Endonuclease iii	chr10: 393283	G	GAA	AO=7	DP=178	frameshift_variant
02 Pool	09	02 Pool_09 plate_14 well	NO21G02320	GTGTTGCTAAACCCGCACGA	Glutaredoxin-like protein	chr21: 699296	CCGCA	C	AO=2	DP=125	frameshift_variant
02 Pool	09	02 Pool_09 plate_16 well	NO08G01270	TGGTGCCACGACACCCTACA	Unknown protein	chr8: 387244	CC	C,CCT	AO=2,5	DP=156	frameshift_variant
02 Pool	09	02 Pool_09 plate_19 well	NO26G01600	CATGGTGCACATCGACGGCA	Gtp-binding protein gb2	chr26: 527121	GC	G	AO=1	DP=58	frameshift_variant
02 Pool	09	02 Pool_09 plate_20 well	NO20G02530	TTTCTCCTCCAAACCCGTGG	glucose-6-phosphate/phosphate translocator 2	chr20: 800100	A	CC,AC	AO=2,3	DP=146	frameshift_variant&synonymous_variant
02 Pool	09	02 Pool_09 plate_20 well	NO15G01920	CTTGGCCTTCGTGACAACAG	Unknown protein	chr15: 539245	CG	C	AO=1	DP=152	frameshift_variant
02 Pool	09	02 Pool_09 plate_21 well	NO02G00780	TTATTTTCCAGTTTGACGGG	Unknown protein	chr2: 261358	CCGT	CGT,C,TCGT	AO=1,1,1	DP=127	frameshift_variant
02 Pool	09	02 Pool_09 plate_22 well	NO02G03950	CACTCCTGGTAAATAAGGTG	Unknown protein	chr2: 1080504	CTT	TT,CTC	AO=2,1	DP=178	frameshift_variant
02 Pool	09	02 Pool_09 plate_22 well	NO14G00950	ATCCAGACGCATCCTCTACC	Unknown protein	chr14: 323560	C	T	AO=2	DP=179	missense_variant
02 Pool	09	02 Pool_09 plate_24 well	NO01G02570	TTGGCGAACAGAGAGCGGGG	Unknown protein	chr1: 667124	CCC	C,CCCG,ACC	AO=1,1,2	DP=174	frameshift_variant
02 Pool	09	02 Pool_09 plate_24 well	NO01G01960	GAATTACCAAGAAATGCACG	Protein kinase c binding protein;Protein kinase c binding protein	chr1: 496018	C	T	AO=2	DP=167	missense_variant
02 Pool	10	02 Pool_10 plate_01 well	NO06G02860	CTGGTGGAGAAGCAGAAACG	Ubiquinone biosynthesis protein coq7;Ubiquinone biosynthesis protein coq7	chr6: 821241	C	T	AO=3	DP=160	missense_variant
02 Pool	10	02 Pool_10 plate_02 well	NO12G03360	ACATGCGACGTGGAACCGGG	Unknown protein;Unknown protein	chr12: 921963	CG	G,C	AO=1,2	DP=152	frameshift_variant
02 Pool	10	02 Pool_10 plate_02 well	NO06G02860	CTGGTGGAGAAGCAGAAACG	Ubiquinone biosynthesis protein coq7;Ubiquinone biosynthesis protein coq7	chr6: 821241	C	T	AO=3	DP=160	missense_variant
02 Pool	10	02 Pool_10 plate_03 well	NO20G02520	GATACTCTCCAATAAACCCG	Unknown protein;Unknown protein;Unknown protein	chr20: 795910	C	CC,T	AO=1,1	DP=115	frameshift_variant
02 Pool	10	02 Pool_10 plate_03 well	NO06G02860	CTGGTGGAGAAGCAGAAACG	Ubiquinone biosynthesis protein coq7;Ubiquinone biosynthesis protein coq7	chr6: 821241	C	T	AO=3	DP=160	missense_variant
02 Pool	10	02 Pool_10 plate_04 well	NO17G01780	TAAACAGCGCCAGAATACGG	Rmd5 like protein	chr17: 513239	ACG	AG,A,AACG,ATCG	AO=2,6,1,1	DP=174	frameshift_variant
02 Pool	10	02 Pool_10 plate_04 well	NO06G02860	CTGGTGGAGAAGCAGAAACG	Ubiquinone biosynthesis protein coq7;Ubiquinone biosynthesis protein coq7	chr6: 821241	C	T	AO=3	DP=160	missense_variant
02 Pool	10	02 Pool_10 plate_04 well	NO20G02520	GATACTCTCCAATAAACCCG	Unknown protein;Unknown protein;Unknown protein	chr20: 795910	C	CC,T	AO=1,1	DP=115	frameshift_variant
02 Pool	10	02 Pool_10 plate_05 well	NO16G00810	GTAAGGATGAAATGACACTG	Concanavalin A-like lectin/glucanase, subgroup	chr16: 263572	ACA	A,ACG	AO=1,1	DP=164	frameshift_variant
02 Pool	10	02 Pool_10 plate_06 well	NO02G00770	AATACTCGTCCTTTTCCCAG	Unknown protein	chr2: 260511	CAGGGGGA	AGGGGGA,CAGGGGA,CAGGGGGG,CAAGGGGA	AO=2,1,2,1	DP=197	frameshift_variant
02 Pool	10	02 Pool_10 plate_06 well	NO06G02860	CTGGTGGAGAAGCAGAAACG	Ubiquinone biosynthesis protein coq7;Ubiquinone biosynthesis protein coq7	chr6: 821241	C	T	AO=3	DP=160	missense_variant
02 Pool	10	02 Pool_10 plate_10 well	NO06G02860	CTGGTGGAGAAGCAGAAACG	Ubiquinone biosynthesis protein coq7;Ubiquinone biosynthesis protein coq7	chr6: 821241	C	T	AO=3	DP=160	missense_variant
02 Pool	10	02 Pool_10 plate_11 well	NO15G02430	GCGAACGAATTGATCGTCAA	Unknown protein	chr15: 669180	G	GA	AO=1	DP=185	frameshift_variant
02 Pool	10	02 Pool_10 plate_11 well	NO06G02860	CTGGTGGAGAAGCAGAAACG	Ubiquinone biosynthesis protein coq7;Ubiquinone biosynthesis protein coq7	chr6: 821241	C	T	AO=3	DP=160	missense_variant
02 Pool	10	02 Pool_10 plate_13 well	NO03G04840	GCTTCCAGTACAAGGCATCG	Unknown protein	chr3: 1380866	A	AT	AO=4	DP=176	frameshift_variant
02 Pool	10	02 Pool_10 plate_13 well	NO06G02860	CTGGTGGAGAAGCAGAAACG	Ubiquinone biosynthesis protein coq7;Ubiquinone biosynthesis protein coq7	chr6: 821241	C	T	AO=3	DP=160	missense_variant
02 Pool	10	02 Pool_10 plate_14 well	NO10G01130	CTGTCTTGAACATTCCCCGA	S-adenosylmethionine mitochondrial carrier	chr10: 342809	CC	C,CG	AO=2,1	DP=150	frameshift_variant
02 Pool	10	02 Pool_10 plate_14 well	NO06G02860	CTGGTGGAGAAGCAGAAACG	Ubiquinone biosynthesis protein coq7;Ubiquinone biosynthesis protein coq7	chr6: 821241	C	T	AO=3	DP=160	missense_variant
02 Pool	10	02 Pool_10 plate_15 well	NO20G02520	GATACTCTCCAATAAACCCG	Unknown protein;Unknown protein;Unknown protein	chr20: 795910	C	CC,T	AO=1,1	DP=115	frameshift_variant
02 Pool	10	02 Pool_10 plate_15 well	NO11G00830	TGTGTTGTCGACCATGATGG	Peroxisome membrane anchor protein Pex14p	chr11: 329783	GA	G	AO=1	DP=178	frameshift_variant
02 Pool	10	02 Pool_10 plate_16 well	NO30G01180	TATATCCACGCCTCTCACGA	Unknown protein	chr30: 429969	G	GG,GT	AO=2,1	DP=133	frameshift_variant
02 Pool	10	02 Pool_10 plate_18 well	NO25G01290	GGAGAATGGTCCTACCCACG	alpha/beta-Hydrolases superfamily protein	chr25: 363135	AC	A,AG	AO=10,1	DP=179	frameshift_variant
02 Pool	10	02 Pool_10 plate_18 well	NO06G02860	CTGGTGGAGAAGCAGAAACG	Ubiquinone biosynthesis protein coq7;Ubiquinone biosynthesis protein coq7	chr6: 821241	C	T	AO=3	DP=160	missense_variant
02 Pool	10	02 Pool_10 plate_19 well	NO14G01240	GACAACGAGACAGTCGACCA	Ribonuclease H2, subunit C;Ribonuclease H2, subunit C	chr14: 403024	GACC	G,GGCC	AO=1,3	DP=173	missense_variant
02 Pool	10	02 Pool_10 plate_19 well	NO05G00350	GTATCTCCTGGACCCACACA	Unknown protein	chr5: 140440	CGT	C	AO=1	DP=30	frameshift_variant
02 Pool	10	02 Pool_10 plate_20 well	NO10G02820	TAGGCCGGTTCCGATCACGG	Protein kinase	chr10: 776743	C	CA	AO=6	DP=178	frameshift_variant
02 Pool	10	02 Pool_10 plate_20 well	NO06G02860	CTGGTGGAGAAGCAGAAACG	Ubiquinone biosynthesis protein coq7;Ubiquinone biosynthesis protein coq7	chr6: 821241	C	T	AO=3	DP=160	missense_variant
02 Pool	10	02 Pool_10 plate_21 well	NO01G03490	ACAAAGGGAGCAAACCTTCG	Calpain 7	chr1: 908991	GG	AGG,AAGG,GC	AO=10,1,1	DP=157	frameshift_variant
02 Pool	10	02 Pool_10 plate_21 well	NO06G02860	CTGGTGGAGAAGCAGAAACG	Ubiquinone biosynthesis protein coq7;Ubiquinone biosynthesis protein coq7	chr6: 821241	C	T	AO=3	DP=160	missense_variant
02 Pool	10	02 Pool_10 plate_22 well	NO01G03490	ACAAAGGGAGCAAACCTTCG	Calpain 7	chr1: 908991	GG	AGG,AAGG,GC	AO=10,1,1	DP=157	frameshift_variant
02 Pool	10	02 Pool_10 plate_24 well	NO01G03040	CTATACACGATAGTGCCGGG	Glucokinase	chr1: 796775	CCCCCCCGG	CCCCCCGG,CCCCCCCCGG,CCCCCCCAGG,TCCCCCCGG,CCCCCCCGA	AO=2,2,1,1,1	DP=204	frameshift_variant
02 Pool	10	02 Pool_10 plate_24 well	NO15G02200	GGAACGCTCGAAGCTAACGG	Myosin light chain kinase	chr15: 616682	TA	T	AO=19	DP=162	frameshift_variant
02 Pool	11	02 Pool_11 plate_03 well	NO15G03020	GCCACCGCTGAGTGAAACCG	Unknown protein	chr15: 835109	CGCGGTTTCACTCA	C	AO=7	DP=148	frameshift_variant
02 Pool	11	02 Pool_11 plate_05 well	NO12G00340	TATCCTGGTTGAGCGTGTGT	Adhesin-like protein	chr12: 121863	TGT	T,TT,TG,TGTT	AO=2,1,1,3	DP=184	frameshift_variant
02 Pool	11	02 Pool_11 plate_07 well	NO17G00050	AGAGAAGGCAGTTTGCTGCA	Golgi-specific brefeldin A-resistance guanine nucleotide exchange factor 1	chr17: 15871	AGTTTGC	TGTT,AGTT	AO=1,6	DP=229	missense_variant&conservative_inframe_deletion
02 Pool	11	02 Pool_11 plate_08 well	NO18G00340	GACATGCGCAAAAAGAGTGG	Peptidylprolyl isomerase;Peptidylprolyl isomerase	chr18: 144433	AGAG	GAG,AGAGG,AGAGT	AO=1,6,5	DP=200	frameshift_variant
02 Pool	11	02 Pool_11 plate_08 well	NO05G01530	CTTGAGCTCCCAGGGCATCG	Ribosomal large subunit pseudouridine synthase a	chr5: 430136	A	AT	AO=6	DP=161	frameshift_variant
02 Pool	11	02 Pool_11 plate_09 well	NO18G00340	GACATGCGCAAAAAGAGTGG	Peptidylprolyl isomerase;Peptidylprolyl isomerase	chr18: 144433	AGAG	GAG,AGAGG,AGAGT	AO=1,6,5	DP=200	frameshift_variant
02 Pool	11	02 Pool_11 plate_09 well	NO17G00050	AGAGAAGGCAGTTTGCTGCA	Golgi-specific brefeldin A-resistance guanine nucleotide exchange factor 1	chr17: 15871	AGTTTGC	TGTT,AGTT	AO=1,6	DP=229	missense_variant&conservative_inframe_deletion
02 Pool	11	02 Pool_11 plate_12 well	NO05G01530	CTTGAGCTCCCAGGGCATCG	Ribosomal large subunit pseudouridine synthase a	chr5: 430136	A	AT	AO=6	DP=161	frameshift_variant
02 Pool	11	02 Pool_11 plate_13 well	NO29G01570	CGTCTTGACAGTACGCCCGG	Urea/Na+ high affinity symporter	chr29: 494535	CG	C	AO=6	DP=215	frameshift_variant
02 Pool	11	02 Pool_11 plate_17 well	NO11G03080	GCCGGTAACATGGATGACGG	Set and mynd domain containing 2	chr11: 964432	G	GT	AO=1	DP=179	frameshift_variant
02 Pool	11	02 Pool_11 plate_18 well	NO08G03600	GGTTGTACTATAGAGTTGGG	Unknown protein	chr8: 1013584	CA	C,CACA,CAA	AO=1,2,3	DP=201	frameshift_variant
02 Pool	11	02 Pool_11 plate_19 well	NO02G00520	ACTGCCGAAGAACTTGACGG	Zn(2)-C6 fungal-type DNA-binding domain protein	chr2: 179539	AACTTG	A	AO=8	DP=138	frameshift_variant&stop_lost
02 Pool	11	02 Pool_11 plate_20 well	NO17G00050	AGAGAAGGCAGTTTGCTGCA	Golgi-specific brefeldin A-resistance guanine nucleotide exchange factor 1	chr17: 15871	AGTTTGC	TGTT,AGTT	AO=1,6	DP=229	missense_variant&conservative_inframe_deletion
02 Pool	12	02 Pool_12 plate_01 well	NO13G02820	TACTGGATGGAAGCGCAGGG	Mitochondrial carrier protein;Mitochondrial carrier protein	chr13: 790006	C	CT,A	AO=1,1	DP=181	frameshift_variant
02 Pool	12	02 Pool_12 plate_02 well	NO09G03040	GAATCTTTCAACGATCCACG	Unknown protein;Unknown protein	chr9: 887480	CACG	ACG,CGCG,CACT	AO=1,1,1	DP=152	frameshift_variant
02 Pool	12	02 Pool_12 plate_03 well	NO10G02350	TCCCACGAAGACAATGTGCG	RNA binding protein	chr10: 643831	C	CA,T	AO=2,1	DP=185	frameshift_variant
02 Pool	12	02 Pool_12 plate_06 well	NO25G01350	CGATGGAGTCGATTTCAAGT	Unknown protein	chr25: 383080	A	C,G	AO=1,2	DP=139	missense_variant
02 Pool	12	02 Pool_12 plate_08 well	NO04G00590	TCATCATCGTCGTAACGGCG	Unknown protein	chr4: 207638	GC	G	AO=1	DP=143	frameshift_variant
02 Pool	12	02 Pool_12 plate_10 well	NO19G01610	CAGCAGGATTGATTGGTGCA	Homologue of a Golgi anti-apoptotic protein identified from vaccinia virus. Transmembrane BAX inhi;Homologue of a Golgi anti-apoptotic protein identified from vaccinia virus. Transmembrane BAX inhi	chr19: 485891	GGTGC	TGC,GGTGT	AO=4,2	DP=195	frameshift_variant
02 Pool	12	02 Pool_12 plate_11 well	NO09G04270	GTTTTCATGGTGATGACCGC	Unknown protein	chr9: 1276876	T	C	AO=2	DP=247	missense_variant
02 Pool	12	02 Pool_12 plate_17 well	NO17G00470	GGTATTCTAATGCCGCAAGG	Plastid lipid associated protein	chr17: 174697	C	CA	AO=2	DP=220	frameshift_variant
02 Pool	12	02 Pool_12 plate_19 well	NO07G02040	AGACGATGATATCCGCGACG	Dna polymerase eta	chr7: 597333	CGA	CA,CG,CGAAA,TGA	AO=1,1,3,1	DP=223	frameshift_variant
02 Pool	12	02 Pool_12 plate_20 well	NO09G04040	GGCCAAAAGATATTCCACAA	Nitric oxide synthase-interacting protein	chr9: 1188440	C	CA	AO=1	DP=138	frameshift_variant
02 Pool	12	02 Pool_12 plate_21 well	NO08G04190	CATAACTGTCCAGAGTGAAG	Unknown protein	chr8: 1209769	T	TA	AO=1	DP=173	frameshift_variant
02 Pool	13	02 Pool_13 plate_01 well	NO15G00730	GTGGCACAGAGATAGCACCA	Unknown protein	chr15: 234720	G	GTG,GT	AO=1,6	DP=162	frameshift_variant
02 Pool	13	02 Pool_13 plate_04 well	NO18G00220	GCGAGTACAAGTACTCGGTG	Unknown protein	chr18: 81401	TC	T,AC	AO=1,1	DP=184	frameshift_variant
02 Pool	13	02 Pool_13 plate_04 well	NO07G00920	TCTGCTCTGTAATGCCTCGG	Obg-like ATPase 1	chr7: 299100	C	T	AO=2	DP=165	missense_variant
02 Pool	13	02 Pool_13 plate_05 well	NO19G01010	GGAAACGAGTGTGGTTTGCA	Unknown protein	chr19: 345530	GC	C,GCAG	AO=1,1	DP=66	frameshift_variant
02 Pool	13	02 Pool_13 plate_06 well	NO05G01630	GCAACCCAGATATAAACACA	30s ribosomal protein s5	chr5: 451001	G	T	AO=3	DP=163	synonymous_variant
02 Pool	13	02 Pool_13 plate_08 well	NO15G00730	GTGGCACAGAGATAGCACCA	Unknown protein	chr15: 234720	G	GTG,GT	AO=1,6	DP=162	frameshift_variant
02 Pool	13	02 Pool_13 plate_08 well	NO04G04710	TGTCCTTATCCCAACTGTCA	Cathepsin l-like proteinase	chr4: 1281460	G	GT	AO=5	DP=149	frameshift_variant
02 Pool	13	02 Pool_13 plate_10 well	NO09G03670	ATGCCCCTGAGAAGCCGTCG	Unknown protein;Unknown protein;Unknown protein;Unknown protein	chr9: 1059157	G	GA,GC	AO=2,1	DP=169	frameshift_variant
02 Pool	13	02 Pool_13 plate_12 well	NO04G04710	TGTCCTTATCCCAACTGTCA	Cathepsin l-like proteinase	chr4: 1281460	G	GT	AO=5	DP=149	frameshift_variant
02 Pool	13	02 Pool_13 plate_13 well	NO07G01190	TCACACCGTGGCATACGCAG	Unknown protein	chr7: 384331	TGC	T,TGGC	AO=2,1	DP=158	frameshift_variant
02 Pool	13	02 Pool_13 plate_14 well	NO07G00870	GTAATGCGTAGGGAGTAGAG	Dna replication factor c subunit	chr7: 287139	CT	C	AO=3	DP=145	frameshift_variant
02 Pool	13	02 Pool_13 plate_15 well	NO15G00730	GTGGCACAGAGATAGCACCA	Unknown protein	chr15: 234720	G	GTG,GT	AO=1,6	DP=162	frameshift_variant
02 Pool	13	02 Pool_13 plate_16 well	NO07G02360	CAGCCAACATAATCAAAGCG	Unknown protein	chr7: 695226	C	CA	AO=3	DP=182	frameshift_variant
02 Pool	13	02 Pool_13 plate_18 well	NO06G04370	CAAATTGGATGCATACACCA	Unknown protein	chr6: 1227915	G	T	AO=2	DP=190	missense_variant
02 Pool	13	02 Pool_13 plate_22 well	NO07G01190	TCACACCGTGGCATACGCAG	Unknown protein	chr7: 384331	TGC	T,TGGC	AO=2,1	DP=158	frameshift_variant
02 Pool	13	02 Pool_13 plate_22 well	NO09G03670	ATGCCCCTGAGAAGCCGTCG	Unknown protein;Unknown protein;Unknown protein;Unknown protein	chr9: 1059157	G	GA,GC	AO=2,1	DP=169	frameshift_variant
02 Pool	13	02 Pool_13 plate_24 well	NO09G03670	ATGCCCCTGAGAAGCCGTCG	Unknown protein;Unknown protein;Unknown protein;Unknown protein	chr9: 1059157	G	GA,GC	AO=2,1	DP=169	frameshift_variant
02 Pool	14	02 Pool_14 plate_02 well	NO19G00370	ATGTCCTACAACTCGCGTCG	Unknown protein	chr19: 148131	CG	C,CGGG,CGT,CC	AO=7,1,2,1	DP=161	frameshift_variant
02 Pool	14	02 Pool_14 plate_04 well	NO12G03970	GTACAGGATGCGGGTCACGT	14 kDa subunit splicing factor 3b	chr12: 1138509	T	TT,C	AO=1,1	DP=187	frameshift_variant
02 Pool	14	02 Pool_14 plate_05 well	NO26G00240	GTTAATTTGGTCTGACGATG	Acyl-coenzyme A oxidase	chr26: 85693	T	TC	AO=7	DP=127	frameshift_variant
02 Pool	14	02 Pool_14 plate_07 well	NO02G02730	CTGCTTAGGTACTACACTCG	Adenosine 3-phospho 5-phosphosulfate transporter 2;Adenosine 3-phospho 5-phosphosulfate transporter 2	chr2: 747693	GT	ATA	AO=38	DP=184	frameshift_variant&missense_variant
02 Pool	14	02 Pool_14 plate_08 well	NO02G02730	CTGCTTAGGTACTACACTCG	Adenosine 3-phospho 5-phosphosulfate transporter 2;Adenosine 3-phospho 5-phosphosulfate transporter 2	chr2: 747693	GT	ATA	AO=38	DP=184	frameshift_variant&missense_variant
02 Pool	14	02 Pool_14 plate_09 well	NO02G02730	CTGCTTAGGTACTACACTCG	Adenosine 3-phospho 5-phosphosulfate transporter 2;Adenosine 3-phospho 5-phosphosulfate transporter 2	chr2: 747693	GT	ATA	AO=38	DP=184	frameshift_variant&missense_variant
02 Pool	14	02 Pool_14 plate_10 well	NO08G01470	ACGATCTCTTCACTGCCAAG	Retinol dehydrogenase	chr8: 462442	GCA	CA,GGCA,GCC	AO=1,2,1	DP=187	frameshift_variant
02 Pool	14	02 Pool_14 plate_10 well	NO04G03910	GCCGTAACAAGTACTACTTG	Sorting nexin-29;Sorting nexin-29	chr4: 1054763	G	GTAGTAG,A	AO=1,1	DP=134	missense_variant
02 Pool	14	02 Pool_14 plate_11 well	NO04G03910	GCCGTAACAAGTACTACTTG	Sorting nexin-29;Sorting nexin-29	chr4: 1054763	G	GTAGTAG,A	AO=1,1	DP=134	missense_variant
02 Pool	14	02 Pool_14 plate_14 well	NO08G01470	ACGATCTCTTCACTGCCAAG	Retinol dehydrogenase	chr8: 462442	GCA	CA,GGCA,GCC	AO=1,2,1	DP=187	frameshift_variant
02 Pool	14	02 Pool_14 plate_16 well	NO07G02030	GCTCGTTGATCAAGGCACTG	Histone-lysine N-methyltransferase	chr7: 596347	A	AAA,AC	AO=5,3	DP=182	frameshift_variant
02 Pool	14	02 Pool_14 plate_17 well	NO13G00790	CCATCCCCTGACTTTCACCG	Unknown protein	chr13: 260173	CCG	CACCG,ACCG,GCCG,CCA	AO=1,1,1,1	DP=168	frameshift_variant
02 Pool	14	02 Pool_14 plate_18 well	NO19G00370	ATGTCCTACAACTCGCGTCG	Unknown protein	chr19: 148131	CG	C,CGGG,CGT,CC	AO=7,1,2,1	DP=161	frameshift_variant
02 Pool	14	02 Pool_14 plate_18 well	NO26G00200	TCTGGTCTCCTTCGTCTCGG	Unknown protein	chr26: 67439	GTC	G	AO=2	DP=168	frameshift_variant
02 Pool	14	02 Pool_14 plate_20 well	NO28G01310	GAGGAGAAAGGGCTTCACGA	ferric reduction oxidase 7	chr28: 411522	TCG	T,TCGG,TCGT,TCGTA	AO=2,1,3,1	DP=160	frameshift_variant
02 Pool	14	02 Pool_14 plate_21 well	NO19G00370	ATGTCCTACAACTCGCGTCG	Unknown protein	chr19: 148131	CG	C,CGGG,CGT,CC	AO=7,1,2,1	DP=161	frameshift_variant
02 Pool	14	02 Pool_14 plate_22 well	NO02G00720	CATCCCGCTTAAGGGCAGAG	Glycosyl family 5;Glycosyl family 5	chr2: 240370	G	TG,A	AO=6,1	DP=162	frameshift_variant
02 Pool	14	02 Pool_14 plate_23 well	NO15G03070	GTAGTAGAGCACCCACACTG	Unknown protein	chr15: 844671	A	AA,AC	AO=1,1	DP=164	frameshift_variant
02 Pool	15	02 Pool_15 plate_01 well	NO15G00730	GTGGCACAGAGATAGCACCA	Unknown protein	chr15: 234720	G	GC	AO=5	DP=204	frameshift_variant
02 Pool	15	02 Pool_15 plate_02 well	NO07G00210	TACGACAACAGACCGCCCAA	Unknown protein	chr7: 94289	GCC	GC,G	AO=10,1	DP=184	frameshift_variant
02 Pool	15	02 Pool_15 plate_04 well	NO12G02030	ACCGAACTCAGAGCTGCCAA	Zinc finger, RING/FYVE/PHD-type	chr12: 576083	GC	G	AO=16	DP=232	frameshift_variant
02 Pool	15	02 Pool_15 plate_05 well	NO21G00840	CTTATTCAATGACACGCTAG	Unknown protein;Unknown protein	chr21: 282415	CT	C,CGCT	AO=2,2	DP=225	frameshift_variant
02 Pool	15	02 Pool_15 plate_08 well	NO15G00730	GTGGCACAGAGATAGCACCA	Unknown protein	chr15: 234720	G	GC	AO=5	DP=204	frameshift_variant
02 Pool	15	02 Pool_15 plate_09 well	NO18G02080	AACTCAATGCTGAACCCCAG	Adenylate cyclase	chr18: 662236	TG	T	AO=7	DP=236	frameshift_variant
02 Pool	15	02 Pool_15 plate_12 well	NO10G00760	GGTGGTACATAAGAGCCCGA	Unknown protein	chr10: 250209	CG	C	AO=8	DP=270	frameshift_variant
02 Pool	15	02 Pool_15 plate_12 well	NO01G02340	GGTTGGGACATGATGCACCG	Unknown protein	chr1: 604993	T	TGT,TT,C	AO=2,2,5	DP=262	frameshift_variant
02 Pool	15	02 Pool_15 plate_13 well	NO15G00730	GTGGCACAGAGATAGCACCA	Unknown protein	chr15: 234720	G	GC	AO=5	DP=204	frameshift_variant
02 Pool	15	02 Pool_15 plate_14 well	NO01G02340	GGTTGGGACATGATGCACCG	Unknown protein	chr1: 604993	T	TGT,TT,C	AO=2,2,5	DP=262	frameshift_variant
02 Pool	15	02 Pool_15 plate_17 well	NO10G02900	GGGAGCAATCGAGTACCTGG	Helicase sen1	chr10: 808160	AG	A	AO=9	DP=245	frameshift_variant
02 Pool	15	02 Pool_15 plate_17 well	NO01G02340	GGTTGGGACATGATGCACCG	Unknown protein	chr1: 604993	T	TGT,TT,C	AO=2,2,5	DP=262	frameshift_variant
02 Pool	15	02 Pool_15 plate_18 well	NO08G01080	TCTAAGAAGCATGACCAGCG	Magnesium and cobalt transport protein;Magnesium and cobalt transport protein;Magnesium and cobalt transport protein;Magnesium and cobalt transport protein	chr8: 340984	GGCCTTATTCTAAGAAGCATGACCAGCGCGGTT	G,GGCCTTATTCTAAGAAGCATGACGCGCGGTT,GGCCTTATTCTAAGAAGCATGACCGCGCGGTT	AO=1,2,1	DP=144	frameshift_variant
02 Pool	15	02 Pool_15 plate_19 well	NO05G02590	ACCACACCATGACATCGCCG	Tetratricopeptide repeat domain-containing protein	chr5: 680210	GGC	G,GGT	AO=1,1	DP=212	frameshift_variant
02 Pool	15	02 Pool_15 plate_21 well	NO03G02570	ACGTGGACATGGAGTGTGTG	Inositol phosphoceramide mannosyltransferase 1	chr3: 742353	GTG	G,GTGTG,GTGT	AO=3,1,2	DP=250	frameshift_variant
02 Pool	15	02 Pool_15 plate_23 well	NO18G02080	AACTCAATGCTGAACCCCAG	Adenylate cyclase	chr18: 662236	TG	T	AO=7	DP=236	frameshift_variant
02 Pool	16	02 Pool_16 plate_02 well	NO03G02810	AAACGAGCAAATCGGTCATG	Snf7 family protein	chr3: 842017	C	CA	AO=5	DP=175	frameshift_variant
02 Pool	16	02 Pool_16 plate_05 well	NO11G01090	ATGATACTGTGCATCTCGCG	Unknown protein	chr11: 403774	CGA	C	AO=1	DP=151	frameshift_variant
02 Pool	16	02 Pool_16 plate_11 well	NO01G00470	GCTTCAAAACCCTCTACGAG	TRX domain-containing protein	chr1: 126811	A	AC	AO=4	DP=164	frameshift_variant
02 Pool	16	02 Pool_16 plate_12 well	NO26G00360	GCGAACGAGTGACAAACACG	Transmembrane CLPTM1 family protein;Transmembrane CLPTM1 family protein;Transmembrane CLPTM1 family protein	chr26: 112055	CGT	C	AO=2	DP=112	frameshift_variant
02 Pool	16	02 Pool_16 plate_14 well	NO26G00360	GCGAACGAGTGACAAACACG	Transmembrane CLPTM1 family protein;Transmembrane CLPTM1 family protein;Transmembrane CLPTM1 family protein	chr26: 112055	CGT	C	AO=2	DP=112	frameshift_variant
02 Pool	16	02 Pool_16 plate_15 well	NO04G01830	GTAAGCGTGTACCAACCAGG	Unknown protein	chr4: 537027	AC	A	AO=1	DP=199	frameshift_variant
02 Pool	16	02 Pool_16 plate_16 well	NO15G00510	AGCCCTCTTGGGCTTCACGG	Major facilitator superfamily permease;Major facilitator superfamily permease	chr15: 169363	G	GC,A	AO=1,1	DP=152	frameshift_variant
02 Pool	16	02 Pool_16 plate_18 well	NO21G02270	ATCCACATCAAGGACCACGA	Unknown protein	chr21: 687424	CAAGGACCACGAAGGA	C	AO=3	DP=152	conservative_inframe_deletion
02 Pool	16	02 Pool_16 plate_19 well	NO21G01760	ACCCTCTTGCAGAAGCTGAG	DNA methylase, N-6 adenine-specific, conserved site	chr21: 523650	GCT	A	AO=4	DP=133	frameshift_variant&synonymous_variant
02 Pool	16	02 Pool_16 plate_21 well	NO09G01230	ACTGATTGGGATGGTGACGA	Unknown protein	chr9: 402823	A	AC,AG,AT	AO=3,2,1	DP=188	frameshift_variant
02 Pool	16	02 Pool_16 plate_23 well	NO04G04150	GGCAACAGAGTACCATACGG	Unknown protein	chr4: 1133828	ACGG	CGG,A,AACGG,ACCGG	AO=1,1,2,1	DP=167	frameshift_variant
02 Pool	17	02 Pool_17 plate_01 well	NO16G00270	ACAATCTTACTACCTGACGC	Cation efflux family protein	chr16: 97659	G	GA	AO=1	DP=191	frameshift_variant
02 Pool	17	02 Pool_17 plate_02 well	NO14G02550	GTACGCGAGTGTATTCGACG	NAD(P)-binding domain protein	chr14: 767998	A	C	AO=2	DP=199	missense_variant
02 Pool	17	02 Pool_17 plate_03 well	NO10G01760	CTTGACATCCCAGACCTACG	cGMP-dependent protein kinase, putative	chr10: 490917	AGG	A,AAGG	AO=4,6	DP=215	frameshift_variant
02 Pool	17	02 Pool_17 plate_05 well	NO04G01520	CAGGCTGATACTTTGCAGGG	Gcn5-related n-acetyltransferase	chr4: 470888	TTTGCAGGGCGGTG	T,TTTGCAGGCGGTG,TTTGCAAGGGCGGTG,TTTGCAGGGGCGGTG	AO=1,1,5,1	DP=194	frameshift_variant
02 Pool	17	02 Pool_17 plate_06 well	NO02G01780	ATCAACTAAGTCTACCCAGG	Qa-syp4 tlg2p syntaxin 16-type	chr2: 521742	A	AC	AO=1	DP=214	frameshift_variant
02 Pool	17	02 Pool_17 plate_07 well	NO22G01830	GCAGTTGACCCACATTCACG	Unknown protein;Unknown protein	chr22: 551168	T	TG	AO=1	DP=175	frameshift_variant&stop_lost
02 Pool	17	02 Pool_17 plate_08 well	NO09G03000	GGTAGTGCTATCAGCCATCG	Unknown protein	chr9: 877756	A	AG	AO=2	DP=225	frameshift_variant
02 Pool	17	02 Pool_17 plate_09 well	NO14G00400	AAATCCGAAAGAGAGGCCTG	Unknown protein	chr14: 164553	GC	G,GCG	AO=1,5	DP=164	frameshift_variant
02 Pool	17	02 Pool_17 plate_09 well	NO15G01250	TCGTAAAGAGAATCACACAA	Adenosine trna methylthiotransferase	chr15: 353816	TTG	T,TTGT	AO=2,4	DP=182	frameshift_variant
02 Pool	17	02 Pool_17 plate_11 well	NO10G02100	ACGGCAGGGCTCTTCAGCAG	Coiled-coil domain-containing protein 25;Coiled-coil domain-containing protein 25;Coiled-coil domain-containing protein 25	chr10: 578328	C	CA	AO=3	DP=86	frameshift_variant
02 Pool	17	02 Pool_17 plate_12 well	NO01G02340	GGTTGGGACATGATGCACCG	Unknown protein	chr1: 604992	G	GTT	AO=7	DP=204	frameshift_variant
02 Pool	17	02 Pool_17 plate_14 well	NO05G00140	CCATCCCAAGCCCTTCACAG	Methyltransferase nsun6	chr5: 60769	CA	CAA,CAG,AA	AO=3,10,1	DP=185	frameshift_variant
02 Pool	17	02 Pool_17 plate_14 well	NO01G02340	GGTTGGGACATGATGCACCG	Unknown protein	chr1: 604992	G	GTT	AO=7	DP=204	frameshift_variant
02 Pool	17	02 Pool_17 plate_15 well	NO01G02340	GGTTGGGACATGATGCACCG	Unknown protein	chr1: 604992	G	GTT	AO=7	DP=204	frameshift_variant
02 Pool	17	02 Pool_17 plate_16 well	NO05G00140	CCATCCCAAGCCCTTCACAG	Methyltransferase nsun6	chr5: 60769	CA	CAA,CAG,AA	AO=3,10,1	DP=185	frameshift_variant
02 Pool	17	02 Pool_17 plate_17 well	NO05G00140	CCATCCCAAGCCCTTCACAG	Methyltransferase nsun6	chr5: 60769	CA	CAA,CAG,AA	AO=3,10,1	DP=185	frameshift_variant
02 Pool	17	02 Pool_17 plate_19 well	NO05G00140	CCATCCCAAGCCCTTCACAG	Methyltransferase nsun6	chr5: 60769	CA	CAA,CAG,AA	AO=3,10,1	DP=185	frameshift_variant
02 Pool	17	02 Pool_17 plate_19 well	NO02G01780	ATCAACTAAGTCTACCCAGG	Qa-syp4 tlg2p syntaxin 16-type	chr2: 521742	A	AC	AO=1	DP=214	frameshift_variant
02 Pool	17	02 Pool_17 plate_20 well	NO10G02100	ACGGCAGGGCTCTTCAGCAG	Coiled-coil domain-containing protein 25;Coiled-coil domain-containing protein 25;Coiled-coil domain-containing protein 25	chr10: 578328	C	CA	AO=3	DP=86	frameshift_variant
02 Pool	17	02 Pool_17 plate_21 well	NO10G02100	ACGGCAGGGCTCTTCAGCAG	Coiled-coil domain-containing protein 25;Coiled-coil domain-containing protein 25;Coiled-coil domain-containing protein 25	chr10: 578328	C	CA	AO=3	DP=86	frameshift_variant
02 Pool	17	02 Pool_17 plate_22 well	NO10G02100	ACGGCAGGGCTCTTCAGCAG	Coiled-coil domain-containing protein 25;Coiled-coil domain-containing protein 25;Coiled-coil domain-containing protein 25	chr10: 578328	C	CA	AO=3	DP=86	frameshift_variant
02 Pool	17	02 Pool_17 plate_23 well	NO15G01250	TCGTAAAGAGAATCACACAA	Adenosine trna methylthiotransferase	chr15: 353816	TTG	T,TTGT	AO=2,4	DP=182	frameshift_variant
02 Pool	18	02 Pool_18 plate_01 well	NO02G03800	GGTAAAGAAGACAGACCGCG	Coiled-coil domain-containing protein 75;Coiled-coil domain-containing protein 75	chr2: 1032982	CG	G,C	AO=1,4	DP=224	frameshift_variant
02 Pool	18	02 Pool_18 plate_02 well	NO16G01660	GCCCATCCCAGAAGACATGG	Trna guanosine-2-o-methyltransferase trm11	chr16: 494868	C	CAAA	AO=5	DP=171	disruptive_inframe_insertion
02 Pool	18	02 Pool_18 plate_03 well	NO28G00920	AAATTTCGAAGAGGCAGACG	Bulb-type lectin domain protein	chr28: 302859	AG	A,AGG,AA	AO=1,5,1	DP=232	frameshift_variant
02 Pool	18	02 Pool_18 plate_03 well	NO10G00430	GTGGATATGCTGGACAAACG	Unknown protein	chr10: 148472	C	T	AO=2	DP=52	synonymous_variant
02 Pool	18	02 Pool_18 plate_04 well	NO19G02600	ATGGTCCCGAAAGACGAAAG	O-acetylhomoserine o-acetylserine sulfhydrylase;O-acetylhomoserine o-acetylserine sulfhydrylase;O-acetylhomoserine o-acetylserine sulfhydrylase;O-acetylhomoserine o-acetylserine sulfhydrylase;O-acetylhomoserine o-acetylserine sulfhydrylase	chr19: 776817	G	GAT	AO=7	DP=215	frameshift_variant
02 Pool	18	02 Pool_18 plate_05 well	NO26G01790	CACAGGCGACATTTACCGGG	EXS (ERD1/XPR1/SYG1) family protein	chr26: 598284	G	GG,C	AO=2,1	DP=193	frameshift_variant
02 Pool	18	02 Pool_18 plate_05 well	NO10G00430	GTGGATATGCTGGACAAACG	Unknown protein	chr10: 148472	C	T	AO=2	DP=52	synonymous_variant
02 Pool	18	02 Pool_18 plate_06 well	NO26G01260	GACGTGGTGATGATGAACAA	Heterogeneous nuclear;Heterogeneous nuclear	chr26: 406338	A	AT	AO=1	DP=217	frameshift_variant
02 Pool	18	02 Pool_18 plate_06 well	NO26G01790	CACAGGCGACATTTACCGGG	EXS (ERD1/XPR1/SYG1) family protein	chr26: 598284	G	GG,C	AO=2,1	DP=193	frameshift_variant
02 Pool	18	02 Pool_18 plate_08 well	NO01G05430	TATCACCCTTACCTTCACGG	Unknown protein	chr1: 1486984	C	T	AO=2	DP=243	missense_variant
02 Pool	18	02 Pool_18 plate_11 well	NO03G05030	GCAGGAACAGAAATTCGACG	Gdsl esterase lipase	chr3: 1427250	TC	T	AO=4	DP=185	frameshift_variant
02 Pool	18	02 Pool_18 plate_12 well	NO01G01660	GGCACGCGAGAGAAACACCA	X-pro dipeptidyl-peptidase domain-containing protein	chr1: 418226	TTGG	T,TTGGC,TTGGT,TTGGTT	AO=1,2,5,1	DP=199	frameshift_variant
02 Pool	18	02 Pool_18 plate_13 well	NO06G04370	CAAATTGGATGCATACACCA	Unknown protein	chr6: 1227910	C	CA	AO=7	DP=206	frameshift_variant
02 Pool	18	02 Pool_18 plate_13 well	NO02G00560	CTGGTACCACATCAGCAACG	Thymidylate synthase;Thymidylate synthase;Thymidylate synthase	chr2: 195029	T	C	AO=2	DP=233	synonymous_variant
02 Pool	18	02 Pool_18 plate_14 well	NO26G01260	GACGTGGTGATGATGAACAA	Heterogeneous nuclear;Heterogeneous nuclear	chr26: 406338	A	AT	AO=1	DP=217	frameshift_variant
02 Pool	18	02 Pool_18 plate_14 well	NO10G00430	GTGGATATGCTGGACAAACG	Unknown protein	chr10: 148472	C	T	AO=2	DP=52	synonymous_variant
02 Pool	18	02 Pool_18 plate_15 well	NO27G00460	GTACCAACATGTGATGTGCA	Unknown protein	chr27: 173803	GCA	G,GCAAA	AO=6,2	DP=226	frameshift_variant
02 Pool	18	02 Pool_18 plate_17 well	NO09G00630	TCCAGAGCATATACAGACGA	Unknown protein	chr9: 238565	A	AA,AG,T	AO=1,1,1	DP=223	frameshift_variant
02 Pool	18	02 Pool_18 plate_17 well	NO10G00430	GTGGATATGCTGGACAAACG	Unknown protein	chr10: 148472	C	T	AO=2	DP=52	synonymous_variant
02 Pool	18	02 Pool_18 plate_18 well	NO26G01790	CACAGGCGACATTTACCGGG	EXS (ERD1/XPR1/SYG1) family protein	chr26: 598284	G	GG,C	AO=2,1	DP=193	frameshift_variant
02 Pool	18	02 Pool_18 plate_19 well	NO10G00430	GTGGATATGCTGGACAAACG	Unknown protein	chr10: 148472	C	T	AO=2	DP=52	synonymous_variant
02 Pool	18	02 Pool_18 plate_20 well	NO10G00430	GTGGATATGCTGGACAAACG	Unknown protein	chr10: 148472	C	T	AO=2	DP=52	synonymous_variant
02 Pool	18	02 Pool_18 plate_21 well	NO30G01140	GGCAACAAACATCAAAAAGG	Drug metabolite transporter superfamily	chr30: 422064	CA	C	AO=1	DP=160	frameshift_variant
02 Pool	18	02 Pool_18 plate_22 well	NO19G01200	TTCAGACGAAGCCGACAGAG	Aldo keto reductase	chr19: 389331	TC	T	AO=1	DP=197	frameshift_variant
02 Pool	18	02 Pool_18 plate_22 well	NO26G01790	CACAGGCGACATTTACCGGG	EXS (ERD1/XPR1/SYG1) family protein	chr26: 598284	G	GG,C	AO=2,1	DP=193	frameshift_variant
02 Pool	18	02 Pool_18 plate_23 well	NO18G00470	GTCAACGACCGTCTCAACAA	Abc transporter	chr18: 198628	GT	G,GTT	AO=1,3	DP=168	frameshift_variant
02 Pool	18	02 Pool_18 plate_24 well	NO14G01470	GCAAACGAGGTACATCTTCG	Transport protein particle (TRAPP) component;Transport protein particle (TRAPP) component;Transport protein particle (TRAPP) component	chr14: 466542	A	AGAG	AO=1	DP=184	conservative_inframe_insertion
02 Pool	19	02 Pool_19 plate_04 well	NO07G02070	ACTGGTTCAAGATCTGAACA	Protein arginine n-methyltransferase 10	chr7: 610069	G	GT,GTT	AO=1,3	DP=135	frameshift_variant
02 Pool	19	02 Pool_19 plate_04 well	NO30G00620	GGACAGACTGACATCCCTGG	alpha/beta-Hydrolases superfamily protein	chr30: 236056	AG	A	AO=2	DP=85	frameshift_variant
02 Pool	19	02 Pool_19 plate_05 well	NO08G01330	CTTGCAGCACCAGAGAAACG	Pentatricopeptide repeat-containing protein mitochondrial	chr8: 403923	C	T	AO=3	DP=154	missense_variant
02 Pool	19	02 Pool_19 plate_08 well	NO20G00030	CACGCGCTTGAACTCCACGA	Tld family protein	chr20: 5170	C	CGG	AO=6	DP=194	frameshift_variant
02 Pool	19	02 Pool_19 plate_09 well	NO30G00620	GGACAGACTGACATCCCTGG	alpha/beta-Hydrolases superfamily protein	chr30: 236056	AG	A	AO=2	DP=85	frameshift_variant
02 Pool	19	02 Pool_19 plate_14 well	NO07G01850	CATGTTGTTGAAGCGCTCGG	Clavaminate synthase-like protein	chr7: 550394	CCGAG	C	AO=1	DP=157	frameshift_variant
02 Pool	19	02 Pool_19 plate_15 well	NO30G00620	GGACAGACTGACATCCCTGG	alpha/beta-Hydrolases superfamily protein	chr30: 236056	AG	A	AO=2	DP=85	frameshift_variant
02 Pool	19	02 Pool_19 plate_17 well	NO01G02610	CTGCCAAAGAGCCACCCTGG	Amidases related to nicotinamidase	chr1: 676940	C	CA	AO=5	DP=151	frameshift_variant
02 Pool	19	02 Pool_19 plate_18 well	NO01G02330	GCACTTCTTGACGAGGTGTG	Transport protein sec61 subunit gamma	chr1: 603814	ACAC	A	AO=2	DP=160	disruptive_inframe_deletion
02 Pool	19	02 Pool_19 plate_21 well	NO07G03880	GTGCCAAGCTTAGTCAGCTG	Histone deacetylase superfamily protein;Histone deacetylase superfamily protein	chr7: 1083072	AG	A	AO=3	DP=72	frameshift_variant
02 Pool	19	02 Pool_19 plate_22 well	NO23G01370	TCGAGGGATCCAATAATGAG	D-3-phosphoglycerate dehydrogenase;NAD(P)-binding domain protein;D-3-phosphoglycerate dehydrogenase	chr23: 496541	CAAT	C	AO=7	DP=158	disruptive_inframe_deletion
02 Pool	19	02 Pool_19 plate_23 well	NO30G00620	GGACAGACTGACATCCCTGG	alpha/beta-Hydrolases superfamily protein	chr30: 236056	AG	A	AO=2	DP=85	frameshift_variant
02 Pool	20	02 Pool_20 plate_01 well	NO01G04760	CTGCATCTCCAAGATCTACG	Unknown protein	chr1: 1259527	T	TA	AO=2	DP=143	frameshift_variant
02 Pool	20	02 Pool_20 plate_03 well	NO12G00860	TAGGTGTCATAGACCCAACG	Pyruvate, phosphate dikinase	chr12: 284884	A	AA,AGA,AG	AO=4,1,3	DP=56	frameshift_variant
02 Pool	20	02 Pool_20 plate_04 well	NO14G01370	GCTCTTGGCATACTTGACGG	FAD/NAD(P)-binding oxidoreductase family protein;FAD/NAD(P)-binding oxidoreductase family protein;FAD/NAD(P)-binding oxidoreductase family protein	chr14: 442452	CGTCAA	C,CGTTCAA	AO=1,2	DP=156	frameshift_variant
02 Pool	20	02 Pool_20 plate_04 well	NO12G00860	TAGGTGTCATAGACCCAACG	Pyruvate, phosphate dikinase	chr12: 284884	A	AA,AGA,AG	AO=4,1,3	DP=56	frameshift_variant
02 Pool	20	02 Pool_20 plate_05 well	NO01G02480	CAACAAACCTAAAAGCACAT	Deah (Asp-glu-ala-his) box polypeptide 35	chr1: 645839	ATG	A	AO=1	DP=149	frameshift_variant
02 Pool	20	02 Pool_20 plate_07 well	NO14G00030	TGATCCGGCAGGCTTCCACG	Ankyrin repeat domain-containing protein 65;Ankyrin repeat domain-containing protein 65	chr14: 7893	GCTTC	G,GCTT,GCTTCC	AO=1,6,10	DP=165	frameshift_variant
02 Pool	20	02 Pool_20 plate_07 well	NO17G00050	AGAGAAGGCAGTTTGCTGCA	Golgi-specific brefeldin A-resistance guanine nucleotide exchange factor 1	chr17: 15878	TGCA	A,TGTA,TGCG	AO=3,1,1	DP=188	stop_gained
02 Pool	20	02 Pool_20 plate_08 well	NO08G01810	GCAGTGGGCTGAATTTGCAA	Zn(2)-C6 fungal-type DNA-binding protein	chr8: 556485	GC	G,GA	AO=2,1	DP=84	frameshift_variant
02 Pool	20	02 Pool_20 plate_08 well	NO09G02300	CAAATCACCCTTCCAACACG	Unknown protein;Unknown protein	chr9: 692120	ACA	A,ACG	AO=4,1	DP=150	frameshift_variant
02 Pool	20	02 Pool_20 plate_08 well	NO29G00660	GCATCGGTGAACAAATGACG	Unknown protein	chr29: 249859	CTCG	C	AO=2	DP=133	disruptive_inframe_deletion
02 Pool	20	02 Pool_20 plate_09 well	NO17G00050	AGAGAAGGCAGTTTGCTGCA	Golgi-specific brefeldin A-resistance guanine nucleotide exchange factor 1	chr17: 15878	TGCA	A,TGTA,TGCG	AO=3,1,1	DP=188	stop_gained
02 Pool	20	02 Pool_20 plate_09 well	NO05G04600	GATTGTTGACGAGATGGTGA	Rieske (2fe-2s) domain protein	chr5: 1198341	TCA	T	AO=2	DP=157	frameshift_variant
02 Pool	20	02 Pool_20 plate_09 well	NO09G02300	CAAATCACCCTTCCAACACG	Unknown protein;Unknown protein	chr9: 692120	ACA	A,ACG	AO=4,1	DP=150	frameshift_variant
02 Pool	20	02 Pool_20 plate_10 well	NO06G00720	TGATGAATCGGAAGGCCGTG	Heat shock protein DnaJ	chr6: 259672	GGC	G,GG,GGCC,GGCCC	AO=1,7,1,1	DP=159	frameshift_variant
02 Pool	20	02 Pool_20 plate_11 well	NO11G00740	TGACAATAAGTTCCACACCG	Eukaryotic peptide chain release factor subunit 1	chr11: 305270	A	C,T	AO=1,5	DP=195	missense_variant
02 Pool	20	02 Pool_20 plate_11 well	NO17G00050	AGAGAAGGCAGTTTGCTGCA	Golgi-specific brefeldin A-resistance guanine nucleotide exchange factor 1	chr17: 15878	TGCA	A,TGTA,TGCG	AO=3,1,1	DP=188	stop_gained
02 Pool	20	02 Pool_20 plate_12 well	NO09G02300	CAAATCACCCTTCCAACACG	Unknown protein;Unknown protein	chr9: 692120	ACA	A,ACG	AO=4,1	DP=150	frameshift_variant
02 Pool	20	02 Pool_20 plate_12 well	NO29G00660	GCATCGGTGAACAAATGACG	Unknown protein	chr29: 249859	CTCG	C	AO=2	DP=133	disruptive_inframe_deletion
02 Pool	20	02 Pool_20 plate_12 well	NO08G01810	GCAGTGGGCTGAATTTGCAA	Zn(2)-C6 fungal-type DNA-binding protein	chr8: 556485	GC	G,GA	AO=2,1	DP=84	frameshift_variant
02 Pool	20	02 Pool_20 plate_14 well	NO08G03190	TGCCAAAAAAGAGTACAAAG	Ubiquitin carboxyl-terminal hydrolase 4	chr8: 878176	TTTG	TTG,T,TT	AO=2,1,1	DP=192	frameshift_variant
02 Pool	20	02 Pool_20 plate_15 well	NO12G00860	TAGGTGTCATAGACCCAACG	Pyruvate, phosphate dikinase	chr12: 284884	A	AA,AGA,AG	AO=4,1,3	DP=56	frameshift_variant
02 Pool	20	02 Pool_20 plate_16 well	NO02G04600	CATCCCCAAGGGTGGCACCG	Cytochrome c heme lyase	chr2: 1244190	T	TTTT,A	AO=1,6	DP=200	missense_variant
02 Pool	20	02 Pool_20 plate_17 well	NO02G03270	TACGATGGCAGGTAAGACAA	Glucose-6-phosphate isomerase	chr2: 880045	A	AC,AG	AO=2,1	DP=128	frameshift_variant
02 Pool	20	02 Pool_20 plate_21 well	NO03G01130	TTGGCAAAGATACCTTGCAG	Unknown protein	chr3: 351332	GC	G	AO=3	DP=152	frameshift_variant
02 Pool	20	02 Pool_20 plate_21 well	NO09G02300	CAAATCACCCTTCCAACACG	Unknown protein;Unknown protein	chr9: 692120	ACA	A,ACG	AO=4,1	DP=150	frameshift_variant
02 Pool	20	02 Pool_20 plate_22 well	NO01G00320	TCACCACAATGACGGCATGG	ATP-sensitive inward rectifier potassium channel 8	chr1: 64915	A	AT	AO=6	DP=178	frameshift_variant
02 Pool	20	02 Pool_20 plate_22 well	NO08G01810	GCAGTGGGCTGAATTTGCAA	Zn(2)-C6 fungal-type DNA-binding protein	chr8: 556485	GC	G,GA	AO=2,1	DP=84	frameshift_variant
02 Pool	20	02 Pool_20 plate_23 well	NO09G02300	CAAATCACCCTTCCAACACG	Unknown protein;Unknown protein	chr9: 692120	ACA	A,ACG	AO=4,1	DP=150	frameshift_variant
02 Pool	21	02 Pool_21 plate_05 well	NO02G01800	TCTCGCATCCACCAACACCG	Fucosyltransferase	chr2: 527956	G	GT	AO=2	DP=121	frameshift_variant
02 Pool	21	02 Pool_21 plate_06 well	NO19G02030	GATCAACTTGCTGCACGCGG	ESCRT-I complex subunit VPS28	chr19: 594896	C	A,T	AO=2,2	DP=161	missense_variant
02 Pool	21	02 Pool_21 plate_09 well	NO14G00470	CGTCTCACACTCTTTCCTGG	Unknown protein	chr14: 184439	G	A	AO=2	DP=141	stop_gained
02 Pool	21	02 Pool_21 plate_09 well	NO09G02300	CAAATCACCCTTCCAACACG	Unknown protein;Unknown protein	chr9: 692119	AAC	A	AO=1	DP=146	frameshift_variant
02 Pool	21	02 Pool_21 plate_12 well	NO09G02300	CAAATCACCCTTCCAACACG	Unknown protein;Unknown protein	chr9: 692119	AAC	A	AO=1	DP=146	frameshift_variant
02 Pool	21	02 Pool_21 plate_13 well	NO29G00150	ACAACTCAGCCCAACCATGG	Unknown protein;Unknown protein	chr29: 63403	C	CA	AO=1	DP=168	frameshift_variant
02 Pool	21	02 Pool_21 plate_16 well	NO01G05890	GGGGAGTAGTGACAAGAACG	Ankyrin repeat-containing protein;Ankyrin repeat-containing protein	chr1: 1658433	AAG	A	AO=3	DP=191	frameshift_variant
02 Pool	21	02 Pool_21 plate_16 well	NO11G03220	CGAGCTACCTAAACGCACAG	Unknown protein	chr11: 1004796	GCA	G	AO=1	DP=123	frameshift_variant
02 Pool	21	02 Pool_21 plate_20 well	NO18G01400	ATGAAGAGTTACGCTTGCGT	Unknown protein;Unknown protein;Unknown protein	chr18: 470677	TG	T	AO=2	DP=129	frameshift_variant
02 Pool	21	02 Pool_21 plate_20 well	NO09G02300	CAAATCACCCTTCCAACACG	Unknown protein;Unknown protein	chr9: 692119	AAC	A	AO=1	DP=146	frameshift_variant
02 Pool	21	02 Pool_21 plate_21 well	NO20G02320	TTTGGAGTGATTGTGCCTTG	Peptidyl prolyl cis trans isomerase like protein	chr20: 700507	GC	G	AO=8	DP=111	frameshift_variant
02 Pool	21	02 Pool_21 plate_23 well	NO09G02300	CAAATCACCCTTCCAACACG	Unknown protein;Unknown protein	chr9: 692119	AAC	A	AO=1	DP=146	frameshift_variant
02 Pool	21	02 Pool_21 plate_23 well	NO12G01890	CCTCGTTGTCAGGAACATCG	Radical sam cfr family	chr12: 543424	A	AT	AO=1	DP=113	frameshift_variant
02 Pool	21	02 Pool_21 plate_24 well	NO18G00570	GTTTGTCCTCGAATAGAAGG	Leucine-rich repeat (LRR) family protein	chr18: 235364	CT	C,CTG	AO=1,1	DP=132	frameshift_variant
02 Pool	22	02 Pool_22 plate_01 well	NO02G01030	AATTACGGTCCTGATCTGCG	Monooxygenase fad-binding protein	chr2: 317456	CTGATC	GTG,CTG	AO=1,20	DP=179	missense_variant&conservative_inframe_deletion
02 Pool	22	02 Pool_22 plate_02 well	NO07G02080	GGATTATACGAGCATACTGG	Pentatricopeptide repeat containing protein	chr7: 616118	C	CT	AO=1	DP=163	frameshift_variant
02 Pool	22	02 Pool_22 plate_05 well	NO26G01790	CACAGGCGACATTTACCGGG	EXS (ERD1/XPR1/SYG1) family protein	chr26: 598277	CC	G,C,CCG	AO=4,4,1	DP=157	frameshift_variant&stop_gained
02 Pool	22	02 Pool_22 plate_05 well	NO10G01780	ACAGGCGTGTGTCTTCAAAG	Unknown protein	chr10: 495450	AA	A,AAA,CAA,GAA,AG	AO=1,1,1,2,1	DP=172	frameshift_variant
02 Pool	22	02 Pool_22 plate_06 well	NO03G01770	TCAATCGACCCTTTGCAGGA	Endonuclease/exonuclease/phosphatase	chr3: 554548	C	CA	AO=1	DP=145	frameshift_variant
02 Pool	22	02 Pool_22 plate_06 well	NO26G01790	CACAGGCGACATTTACCGGG	EXS (ERD1/XPR1/SYG1) family protein	chr26: 598277	CC	G,C,CCG	AO=4,4,1	DP=157	frameshift_variant&stop_gained
02 Pool	22	02 Pool_22 plate_08 well	NO08G01810	GCAGTGGGCTGAATTTGCAA	Zn(2)-C6 fungal-type DNA-binding protein	chr8: 556485	GC	G	AO=1	DP=100	frameshift_variant
02 Pool	22	02 Pool_22 plate_08 well	NO01G02430	CGGAGGTACAGGGCTCCACA	Phospholipase membrane-associated	chr1: 630273	CGCCCTGTGGA	C,CGCCCTGTTGA	AO=1,1	DP=141	frameshift_variant
02 Pool	22	02 Pool_22 plate_11 well	NO15G02890	TTTACACGCATGATCCCCCA	Unknown protein	chr15: 787617	GA	A,GG	AO=8,1	DP=184	frameshift_variant
02 Pool	22	02 Pool_22 plate_12 well	NO08G01810	GCAGTGGGCTGAATTTGCAA	Zn(2)-C6 fungal-type DNA-binding protein	chr8: 556485	GC	G	AO=1	DP=100	frameshift_variant
02 Pool	22	02 Pool_22 plate_13 well	NO17G02730	GTCCACTGAAGGTCTGAGGG	Unknown protein;Unknown protein;Unknown protein;Unknown protein	chr17: 801765	A	AA,ACA,AC	AO=2,1,1	DP=178	frameshift_variant
02 Pool	22	02 Pool_22 plate_18 well	NO26G01790	CACAGGCGACATTTACCGGG	EXS (ERD1/XPR1/SYG1) family protein	chr26: 598277	CC	G,C,CCG	AO=4,4,1	DP=157	frameshift_variant&stop_gained
02 Pool	22	02 Pool_22 plate_19 well	NO29G01730	AGGATCGAAATTCTTGAAGG	Protein fucoxanthin chlorophyll a c protein	chr29: 549468	GA	G,GAC	AO=2,1	DP=100	frameshift_variant
02 Pool	22	02 Pool_22 plate_20 well	NO08G01810	GCAGTGGGCTGAATTTGCAA	Zn(2)-C6 fungal-type DNA-binding protein	chr8: 556485	GC	G	AO=1	DP=100	frameshift_variant
02 Pool	22	02 Pool_22 plate_22 well	NO02G01030	AATTACGGTCCTGATCTGCG	Monooxygenase fad-binding protein	chr2: 317456	CTGATC	GTG,CTG	AO=1,20	DP=179	missense_variant&conservative_inframe_deletion
02 Pool	22	02 Pool_22 plate_23 well	NO03G04020	GCTCGTACGAGGCCAACACG	Ankyrin repeat family protein with DHHC zinc finger domain	chr3: 1172653	GTT	A,T,GGTT	AO=4,2,1	DP=177	frameshift_variant
02 Pool	23	02 Pool_23 plate_03 well	NO30G00920	GGAGGGTTTTAATATCTCCG	Unknown protein	chr30: 340101	GAGAT	GAT,GGAT,G,GAAGAT	AO=5,2,1,1	DP=125	frameshift_variant
02 Pool	23	02 Pool_23 plate_04 well	NO27G00220	GGAGGCGGTCGAAATCACTG	Unknown protein	chr27: 76772	GGAGGCGGTCGAAATCACT	GGAGGCGGTCGAAATCCT,G,GGAGGCGGTCGAAATCAGCT,GGAGGCGGTCGTAATCACT	AO=1,1,1,1	DP=157	frameshift_variant
02 Pool	23	02 Pool_23 plate_04 well	NO30G00620	GGACAGACTGACATCCCTGG	alpha/beta-Hydrolases superfamily protein	chr30: 236056	AG	A,AGG	AO=4,1	DP=94	frameshift_variant
02 Pool	23	02 Pool_23 plate_05 well	NO07G02970	ATGTTTCGACGAGTAGGAGC	30s ribosomal protein s17	chr7: 835624	C	G	AO=4	DP=116	missense_variant
02 Pool	23	02 Pool_23 plate_07 well	NO03G03800	TGTCAATGGTCCTTCCACTG	Diacylglycerol kinase	chr3: 1118681	AG	A,AGC,AGT,AC	AO=1,1,1,2	DP=126	frameshift_variant
02 Pool	23	02 Pool_23 plate_09 well	NO30G00620	GGACAGACTGACATCCCTGG	alpha/beta-Hydrolases superfamily protein	chr30: 236056	AG	A,AGG	AO=4,1	DP=94	frameshift_variant
02 Pool	23	02 Pool_23 plate_11 well	NO01G02240	GATGGAAAAGTACCGCACCG	Unknown protein;Unknown protein	chr1: 583075	CGG	GG,CGGC	AO=1,1	DP=139	frameshift_variant
02 Pool	23	02 Pool_23 plate_13 well	NO24G01500	ACAGGCCTTGTATTCCCTCG	Radical sam domain protein;Radical sam domain protein;Radical sam domain protein	chr24: 400420	AG	A	AO=3	DP=156	frameshift_variant
02 Pool	23	02 Pool_23 plate_15 well	NO30G00620	GGACAGACTGACATCCCTGG	alpha/beta-Hydrolases superfamily protein	chr30: 236056	AG	A,AGG	AO=4,1	DP=94	frameshift_variant
02 Pool	23	02 Pool_23 plate_15 well	NO07G00090	GCTGGTAGCACCTATTGCAG	Unknown protein	chr7: 36830	G	GC	AO=4	DP=165	frameshift_variant
02 Pool	23	02 Pool_23 plate_16 well	NO17G00760	GGACGACACTGAAGGCACCA	Protein serine threonine kinase	chr17: 262925	GCAC	G,GTAC	AO=2,1	DP=148	missense_variant
02 Pool	23	02 Pool_23 plate_18 well	NO16G01850	GCCCGAGTGATTCATGAAAG	Unknown protein	chr16: 544193	A	AA,AC	AO=4,2	DP=129	frameshift_variant
02 Pool	23	02 Pool_23 plate_19 well	NO30G00620	GGACAGACTGACATCCCTGG	alpha/beta-Hydrolases superfamily protein	chr30: 236056	AG	A,AGG	AO=4,1	DP=94	frameshift_variant
02 Pool	23	02 Pool_23 plate_21 well	NO01G03320	CAGCATGAAAGAGATGACCA	UBA-like protein;UBA-like protein	chr1: 871586	AC	A	AO=3	DP=157	frameshift_variant
02 Pool	24	02 Pool_24 plate_01 well	NO21G02380	GCTTGAAGAATACTTCCCCG	Ankyrin repeat protein, putative	chr21: 716914	CG	C	AO=1	DP=137	frameshift_variant
02 Pool	24	02 Pool_24 plate_02 well	NO28G01410	TTCCACTCCACATTTCCACG	Unknown protein	chr28: 442083	TC	T	AO=5	DP=149	frameshift_variant
02 Pool	24	02 Pool_24 plate_06 well	NO01G04600	CCACAGCAAGAAAACCACAG	Ankyrin unc44	chr1: 1217452	CCA	C	AO=1	DP=174	frameshift_variant
02 Pool	24	02 Pool_24 plate_07 well	NO01G03010	CGAGGTCTTCAACCGTACGC	Proteasome activator subunit 1	chr1: 791510	TACGC	T	AO=2	DP=137	frameshift_variant
02 Pool	24	02 Pool_24 plate_08 well	NO06G02140	CGATGGACAGAGGAGCGCAG	Unknown protein	chr6: 623804	G	GA	AO=3	DP=155	frameshift_variant
02 Pool	24	02 Pool_24 plate_09 well	NO03G04320	CAAACCTACCATCACAACAG	Solute carrier family 2 (Facilitated glucose transporter) member 13	chr3: 1246512	CACA	C	AO=1	DP=142	disruptive_inframe_deletion
02 Pool	24	02 Pool_24 plate_10 well	NO09G03670	ATGCCCCTGAGAAGCCGTCG	Unknown protein;Unknown protein;Unknown protein;Unknown protein	chr9: 1059155	CCGT	CCTCT,C,CCGGT,CCGAT,CCGTT,CCGTTT,CCTT	AO=1,4,1,3,1,1,1	DP=171	frameshift_variant&missense_variant
02 Pool	24	02 Pool_24 plate_11 well	NO15G00750	GCAAGTCCGGCCTTCATACG	Unknown protein	chr15: 238028	A	AT	AO=2	DP=86	frameshift_variant
02 Pool	24	02 Pool_24 plate_12 well	NO04G04740	CGGTGCGTAGGACATCGATG	Mitochondrial carrier protein	chr4: 1286784	AT	A	AO=1	DP=129	frameshift_variant
02 Pool	24	02 Pool_24 plate_13 well	NO09G03670	ATGCCCCTGAGAAGCCGTCG	Unknown protein;Unknown protein;Unknown protein;Unknown protein	chr9: 1059155	CCGT	CCTCT,C,CCGGT,CCGAT,CCGTT,CCGTTT,CCTT	AO=1,4,1,3,1,1,1	DP=171	frameshift_variant&missense_variant
02 Pool	24	02 Pool_24 plate_18 well	NO06G01180	CTGGGGAAAAGTGAAGTGTG	2-succinyl-6-hydroxy--cyclohexadiene-1-carboxylate synthase	chr6: 373019	C	CA,CAA	AO=5,1	DP=160	frameshift_variant
02 Pool	24	02 Pool_24 plate_22 well	NO09G03670	ATGCCCCTGAGAAGCCGTCG	Unknown protein;Unknown protein;Unknown protein;Unknown protein	chr9: 1059155	CCGT	CCTCT,C,CCGGT,CCGAT,CCGTT,CCGTTT,CCTT	AO=1,4,1,3,1,1,1	DP=171	frameshift_variant&missense_variant
02 Pool	24	02 Pool_24 plate_24 well	NO18G01830	GAAATTTCCGAGCATCTGGG	Unknown protein	chr18: 567248	C	CA	AO=9	DP=141	frameshift_variant
02 Pool	24	02 Pool_24 plate_24 well	NO01G03040	CTATACACGATAGTGCCGGG	Glucokinase	chr1: 796774	GC	G,GCC	AO=1,2	DP=147	splice_acceptor_variant&intron_variant
03 Pool	01	03 Pool_01 plate_02 well	NO03G01060	AAGCGCATAAGTGATTGTTG	Unknown protein	chr3: 333869	CACAATCTGCCGCA	C,CACAATCTGGCGCA	AO=1,1	DP=196	frameshift_variant
03 Pool	01	03 Pool_01 plate_03 well	NO14G00720	AAGCAATTTACGGGCCGTGG	Protein yippee-like;Protein yippee-like	chr14: 258029	GCCG	G,GCC,GCCGT	AO=4,1,3	DP=164	frameshift_variant
03 Pool	01	03 Pool_01 plate_04 well	NO15G02660	AATGCGCCAAAATCAGACCG	Inositol oxygenase	chr15: 722975	G	GT	AO=1	DP=185	frameshift_variant
03 Pool	01	03 Pool_01 plate_05 well	NO11G02240	CATTTACGAGTATGGCAGCG	Cupin, RmlC-type	chr11: 727842	CGCT	C,CGCTT,CGAT	AO=1,3,1	DP=168	frameshift_variant
03 Pool	01	03 Pool_01 plate_06 well	NO09G03500	GAAATTGATGGAGGACACGA	Unknown protein	chr9: 1003180	C	CA	AO=7	DP=190	frameshift_variant
03 Pool	01	03 Pool_01 plate_07 well	NO07G00680	CACAATGTTATCATTGCCCG	FAD dependent oxidoreductase;FAD dependent oxidoreductase	chr7: 247023	ATTGC	A,ATTG	AO=1,5	DP=145	frameshift_variant
03 Pool	01	03 Pool_01 plate_08 well	NO08G03900	TGGTACGGCTGAGCTTGAGT	50S ribosomal protein L23	chr8: 1097696	TGAGTGGGAGCTC	T	AO=4	DP=141	disruptive_inframe_deletion
03 Pool	01	03 Pool_01 plate_09 well	NO04G00470	GGTGTACTTTGGAGACAACG	MFS family major facilitator transporter	chr4: 177438	CGTT	C,CGT,CGTTT	AO=2,1,1	DP=164	frameshift_variant
03 Pool	01	03 Pool_01 plate_10 well	NO28G00600	TGGTCAAATCAAGATCACCA	T-complex protein 1 subunit zeta	chr28: 214294	G	GT	AO=1	DP=190	frameshift_variant
03 Pool	01	03 Pool_01 plate_11 well	NO16G01990	TCGCTGTGAAGATGAGACTG	Unknown protein	chr16: 585587	AC	A	AO=6	DP=179	frameshift_variant
03 Pool	01	03 Pool_01 plate_12 well	NO08G03900	TGGTACGGCTGAGCTTGAGT	50S ribosomal protein L23	chr8: 1097696	TGAGTGGGAGCTC	T	AO=4	DP=141	disruptive_inframe_deletion
03 Pool	01	03 Pool_01 plate_13 well	NO01G05510	CTAACGTTGGGCACACATGG	nucleotide repair protein, putative	chr1: 1514264	A	AA,AC,AT	AO=9,1,2	DP=151	frameshift_variant
03 Pool	01	03 Pool_01 plate_14 well	NO29G00560	GGAGCTGGAGGAGATTCGCG	Caltractin	chr29: 213882	CT	C	AO=1	DP=96	frameshift_variant
03 Pool	01	03 Pool_01 plate_15 well	NO13G02840	TGTTGTGAACAAGAACACGG	Unknown protein	chr13: 791243	C	CA	AO=4	DP=160	frameshift_variant
03 Pool	01	03 Pool_01 plate_16 well	NO05G04560	CACATCATCATAACCGCCGT	Unknown protein	chr5: 1182760	CG	G,CA	AO=5,1	DP=144	frameshift_variant
03 Pool	01	03 Pool_01 plate_20 well	NO01G05510	CTAACGTTGGGCACACATGG	nucleotide repair protein, putative	chr1: 1514264	A	AA,AC,AT	AO=9,1,2	DP=151	frameshift_variant
03 Pool	01	03 Pool_01 plate_21 well	NO01G05510	CTAACGTTGGGCACACATGG	nucleotide repair protein, putative	chr1: 1514264	A	AA,AC,AT	AO=9,1,2	DP=151	frameshift_variant
03 Pool	01	03 Pool_01 plate_22 well	NO29G00560	GGAGCTGGAGGAGATTCGCG	Caltractin	chr29: 213882	CT	C	AO=1	DP=96	frameshift_variant
03 Pool	01	03 Pool_01 plate_24 well	NO01G05510	CTAACGTTGGGCACACATGG	nucleotide repair protein, putative	chr1: 1514264	A	AA,AC,AT	AO=9,1,2	DP=151	frameshift_variant
03 Pool	01	03 Pool_01 plate_18 well	NO13G02350	ATTCTCGTTACCCTCCGGAG	Abc1 family protein	chr13: 652763	TC	T	AO=1	DP=137	frameshift_variant
03 Pool	02	03 Pool_02 plate_01 well	NO30G00620	GGACAGACTGACATCCCTGG	alpha/beta-Hydrolases superfamily protein	chr30: 236056	AGG	AG,A	AO=4,1	DP=152	frameshift_variant
03 Pool	02	03 Pool_02 plate_02 well	NO09G01930	CCTCTGGTATTATCTCCAAG	ZIP family transporter	chr9: 596740	T	TC	AO=3	DP=241	frameshift_variant
03 Pool	02	03 Pool_02 plate_04 well	NO25G01640	TGTAACGACGTACGACAATG	Carboxyl-terminal protease	chr25: 459157	C	CA	AO=10	DP=166	frameshift_variant
03 Pool	02	03 Pool_02 plate_05 well	NO03G01160	TTATCAACATCAGCAAGACA	72 kDa inositol polyphosphate 5-phosphatase	chr3: 363337	T	TG	AO=15	DP=184	frameshift_variant
03 Pool	02	03 Pool_02 plate_06 well	NO22G01610	CAACGATGAGGATCCCGCCG	Unknown protein	chr22: 473835	G	GC	AO=5	DP=206	frameshift_variant
03 Pool	02	03 Pool_02 plate_09 well	NO22G01610	CAACGATGAGGATCCCGCCG	Unknown protein	chr22: 473835	G	GC	AO=5	DP=206	frameshift_variant
03 Pool	02	03 Pool_02 plate_10 well	NO05G03960	ATTCGTGGTATATCCAACCG	Rna recognition motif-containing protein	chr5: 1025230	G	GT	AO=1	DP=220	frameshift_variant
03 Pool	02	03 Pool_02 plate_12 well	NO01G04860	TGGCTTGATGACCATGCGAG	Peptidyl-prolyl cis-trans isomerase	chr1: 1285350	CATGC	C,CAT	AO=2,2	DP=246	frameshift_variant
03 Pool	02	03 Pool_02 plate_13 well	NO03G02850	TCCCGGCATTGTCTAGTCCA	Adp-ribosylation factor 3;Adp-ribosylation factor 3;Adp-ribosylation factor 3;Adp-ribosylation factor 3	chr3: 859035	CTAG	C	AO=7	DP=204	conservative_inframe_deletion
03 Pool	02	03 Pool_02 plate_14 well	NO01G00920	GGCAGACATGGCTATCCCTG	Atp synthase subunit epsilon	chr1: 232470	TC	T	AO=4	DP=183	frameshift_variant
03 Pool	02	03 Pool_02 plate_17 well	NO01G00240	GAGTGTGGTGGAATTTGCCG	Unknown protein	chr1: 40478	GCAA	G	AO=1	DP=195	disruptive_inframe_deletion
03 Pool	02	03 Pool_02 plate_17 well	NO13G02850	GTACATGGACGAGAACCCCG	Unknown protein	chr13: 794408	AC	A	AO=1	DP=198	frameshift_variant
03 Pool	02	03 Pool_02 plate_18 well	NO05G03960	ATTCGTGGTATATCCAACCG	Rna recognition motif-containing protein	chr5: 1025230	G	GT	AO=1	DP=220	frameshift_variant
03 Pool	02	03 Pool_02 plate_19 well	NO23G00290	GCACCTTGAGAGCCGCTGTG	Outer dynein arm heavy chain beta	chr23: 128139	AGC	AC,A,AAGC	AO=1,1,2	DP=293	frameshift_variant
03 Pool	02	03 Pool_02 plate_20 well	NO11G03590	GCGCGTCTTGACATTCGCCA	Unknown protein	chr11: 1155740	GC	G	AO=4	DP=278	frameshift_variant
03 Pool	02	03 Pool_02 plate_20 well	NO26G00460	CACTCACCACACAATCACAG	Unknown protein	chr26: 163793	CTG	C	AO=2	DP=218	frameshift_variant
03 Pool	02	03 Pool_02 plate_22 well	NO03G02810	AAACGAGCAAATCGGTCATG	Snf7 family protein	chr3: 842014	GGTC	G,GGTCG	AO=3,2	DP=214	frameshift_variant
03 Pool	02	03 Pool_02 plate_23 well	NO22G01610	CAACGATGAGGATCCCGCCG	Unknown protein	chr22: 473835	G	GC	AO=5	DP=206	frameshift_variant
03 Pool	02	03 Pool_02 plate_23 well	NO03G02810	AAACGAGCAAATCGGTCATG	Snf7 family protein	chr3: 842014	GGTC	G,GGTCG	AO=3,2	DP=214	frameshift_variant
03 Pool	02	03 Pool_02 plate_24 well	NO24G02060	TCGCAAGTTATCTTCCCACG	Generic methyltransferase	chr24: 548691	CCA	CCCC,CA,A,CCCA	AO=1,13,2,3	DP=200	frameshift_variant
03 Pool	03	03 Pool_03 plate_02 well	NO19G02320	TCGACTCGAGGAAGGTGAGG	Metallo-hydrolase/oxidoreductase superfamily protein	chr19: 671583	T	TA	AO=1	DP=30	frameshift_variant
03 Pool	03	03 Pool_03 plate_07 well	NO06G02080	ATAGCCTACCCCATACCGGG	Chromatin associated protein KTI12	chr6: 610616	GG	G,GA	AO=3,1	DP=130	frameshift_variant
03 Pool	03	03 Pool_03 plate_08 well	NO15G00480	CATATACACCTTCTGCAAGG	Rhinocladiella mackenziei CBS 650.93 unplaced genomic scaffold supercont1.12, whole genome shotgun sequence;Ankyrin repeat domain-containing protein 17	chr15: 165251	C	CA	AO=6	DP=132	frameshift_variant
03 Pool	03	03 Pool_03 plate_10 well	NO19G02320	TCGACTCGAGGAAGGTGAGG	Metallo-hydrolase/oxidoreductase superfamily protein	chr19: 671583	T	TA	AO=1	DP=30	frameshift_variant
03 Pool	03	03 Pool_03 plate_13 well	NO06G01010	TAGCTCGATGACGTACTCCA	Methyltransferase type 11	chr6: 328198	GGA	G,GGAA	AO=8,2	DP=145	frameshift_variant
03 Pool	03	03 Pool_03 plate_14 well	NO19G02320	TCGACTCGAGGAAGGTGAGG	Metallo-hydrolase/oxidoreductase superfamily protein	chr19: 671583	T	TA	AO=1	DP=30	frameshift_variant
03 Pool	03	03 Pool_03 plate_16 well	NO02G01080	ACAACAGTCGCACAAACAGG	Unknown protein	chr2: 337365	C	CG	AO=1	DP=88	frameshift_variant
03 Pool	03	03 Pool_03 plate_17 well	NO23G00990	AGTGATATAGGGGTGAGACA	Serine/threonine-protein phosphatase	chr23: 371727	A	AG	AO=6	DP=139	frameshift_variant
03 Pool	03	03 Pool_03 plate_18 well	NO02G03510	TCGTGCGGTTGAGTACCACG	Ring u-box domain-containing protein	chr2: 939567	TG	T	AO=1	DP=135	frameshift_variant
03 Pool	03	03 Pool_03 plate_24 well	NO18G00940	ATGATGCTTCTGGTAATGAG	Unknown protein;Unknown protein	chr18: 344474	TA	T	AO=3	DP=110	frameshift_variant
03 Pool	03	03 Pool_03 plate_01 well	NO14G00720	AAGCAATTTACGGGCCGTGG	Protein yippee-like;Protein yippee-like	chr14: 258033	TG	T	AO=1	DP=139	frameshift_variant
03 Pool	04	03 Pool_04 plate_10 well	NO02G04340	CATCATCCAACAAAGAAGCA	60s ribosomal protein l37a	chr2: 1173096	CT	C	AO=1	DP=147	frameshift_variant
03 Pool	05	03 Pool_05 plate_01 well	NO13G02260	TTTCAAGAGGCAGATCCTGG	Actin cytoskeleton-regulatory complex protein pan1	chr13: 631266	CCTGGTGGTACT	C,CCGTGGTGGTACT	AO=1,14	DP=151	frameshift_variant
03 Pool	05	03 Pool_05 plate_01 well	NO03G03230	TTCATTGCACCATCACCAGG	Mitochondrial carrier family	chr3: 958982	T	TGG	AO=1	DP=156	frameshift_variant
03 Pool	05	03 Pool_05 plate_02 well	NO05G01790	ATGCGCGCAACGAATCAGGA	F-actin-capping protein subunit beta	chr5: 491202	ATCAG	G,ATCA	AO=1,1	DP=130	frameshift_variant
03 Pool	05	03 Pool_05 plate_05 well	NO13G02260	TTTCAAGAGGCAGATCCTGG	Actin cytoskeleton-regulatory complex protein pan1	chr13: 631266	CCTGGTGGTACT	C,CCGTGGTGGTACT	AO=1,14	DP=151	frameshift_variant
03 Pool	05	03 Pool_05 plate_07 well	NO15G02320	GGAGTACTTGGAGAACTACG	Flavin monooxygenase FMO	chr15: 645710	C	CT	AO=1	DP=134	frameshift_variant
03 Pool	05	03 Pool_05 plate_08 well	NO03G03230	TTCATTGCACCATCACCAGG	Mitochondrial carrier family	chr3: 958982	T	TGG	AO=1	DP=156	frameshift_variant
03 Pool	05	03 Pool_05 plate_09 well	NO14G01210	GTCACGTCCTCAAAGCCGCG	Pre-mRNA-splicing factor cwc2;Pre-mRNA-splicing factor cwc2	chr14: 395202	CCG	C,CCCG	AO=2,2	DP=152	frameshift_variant
03 Pool	05	03 Pool_05 plate_12 well	NO03G03230	TTCATTGCACCATCACCAGG	Mitochondrial carrier family	chr3: 958982	T	TGG	AO=1	DP=156	frameshift_variant
03 Pool	05	03 Pool_05 plate_13 well	NO24G01870	GTCCTCAAGAGATTCGCATA	Protein CLEC16A homolog	chr24: 497531	GC	G	AO=1	DP=63	frameshift_variant
03 Pool	05	03 Pool_05 plate_13 well	NO13G02260	TTTCAAGAGGCAGATCCTGG	Actin cytoskeleton-regulatory complex protein pan1	chr13: 631266	CCTGGTGGTACT	C,CCGTGGTGGTACT	AO=1,14	DP=151	frameshift_variant
03 Pool	05	03 Pool_05 plate_16 well	NO24G00230	GTACAAAGTCGAGGCCATCG	DNA-dependent metalloprotease WSS1	chr24: 73460	CCATCGAGGT	C	AO=1	DP=157	conservative_inframe_deletion
03 Pool	05	03 Pool_05 plate_19 well	NO05G01790	ATGCGCGCAACGAATCAGGA	F-actin-capping protein subunit beta	chr5: 491202	ATCAG	G,ATCA	AO=1,1	DP=130	frameshift_variant
03 Pool	05	03 Pool_05 plate_22 well	NO13G02260	TTTCAAGAGGCAGATCCTGG	Actin cytoskeleton-regulatory complex protein pan1	chr13: 631266	CCTGGTGGTACT	C,CCGTGGTGGTACT	AO=1,14	DP=151	frameshift_variant
03 Pool	05	03 Pool_05 plate_23 well	NO13G02260	TTTCAAGAGGCAGATCCTGG	Actin cytoskeleton-regulatory complex protein pan1	chr13: 631266	CCTGGTGGTACT	C,CCGTGGTGGTACT	AO=1,14	DP=151	frameshift_variant
03 Pool	05	03 Pool_05 plate_24 well	NO26G00340	ACGATTATGACTCACATCCA	Chc1-b-prov like-protein	chr26: 106195	A	ATG	AO=3	DP=71	frameshift_variant
03 Pool	06	03 Pool_06 plate_02 well	NO12G01050	TGGTAACCGAGACAACGACG	Phosphatidylglycerol/phosphatidylinositol transfer protein	chr12: 333561	AACG	A,AAC,AACGG,AACGA	AO=4,2,1,1	DP=162	frameshift_variant
03 Pool	06	03 Pool_06 plate_03 well	NO15G01840	GATATCAAGACGTTCCAACA	UDENN	chr15: 523910	T	TT,TTT,TC	AO=2,2,1	DP=168	frameshift_variant
03 Pool	06	03 Pool_06 plate_04 well	NO12G01050	TGGTAACCGAGACAACGACG	Phosphatidylglycerol/phosphatidylinositol transfer protein	chr12: 333561	AACG	A,AAC,AACGG,AACGA	AO=4,2,1,1	DP=162	frameshift_variant
03 Pool	06	03 Pool_06 plate_05 well	NO23G00200	GTGAGTGGATAAGTACTGGT	Transmembrane protein	chr23: 89440	TACC	T,TACCA	AO=1,5	DP=183	frameshift_variant
03 Pool	06	03 Pool_06 plate_06 well	NO18G00500	GCTGCGTTTCCTATCGACAG	Unknown protein	chr18: 206427	GT	G	AO=1	DP=96	frameshift_variant
03 Pool	06	03 Pool_06 plate_07 well	NO22G01350	TGCGATGGAAAGGATGACTG	Unknown protein	chr22: 401711	AGCAGCAGCAGCAACTTTTTCCCCAGTCATCCTTTCCATC	A,AGCAGCAGCAACTTTTTCCCCAGTCATCCTTTCCATC,AGCAGCAACTTTTTCCCCAGTCATCCTTTCCATC	AO=1,1,1	DP=110	disruptive_inframe_deletion
03 Pool	06	03 Pool_06 plate_08 well	NO09G03800	GGTTCCAATAGGGCTCCACG	Sulfite oxidase	chr9: 1089056	TG	T	AO=3	DP=207	frameshift_variant
03 Pool	06	03 Pool_06 plate_08 well	NO02G05010	CAATCTACGTCACGACCACG	Unknown protein	chr2: 1343677	TGGTC	T	AO=1	DP=181	frameshift_variant
03 Pool	06	03 Pool_06 plate_09 well	NO03G04020	GCTCGTACGAGGCCAACACG	Ankyrin repeat family protein with DHHC zinc finger domain	chr3: 1172651	GTGT	G,GTG,GTGGT	AO=1,2,2	DP=205	frameshift_variant
03 Pool	06	03 Pool_06 plate_12 well	NO02G05010	CAATCTACGTCACGACCACG	Unknown protein	chr2: 1343677	TGGTC	T	AO=1	DP=181	frameshift_variant
03 Pool	06	03 Pool_06 plate_16 well	NO03G04640	CAGCCTCAATTACCAGAACG	Unknown protein	chr3: 1330896	GT	G,GTTT	AO=2,2	DP=167	frameshift_variant
03 Pool	06	03 Pool_06 plate_18 well	NO14G02800	GGATGACAGAGGCCATTGAG	Phytoene dehydrogenase	chr14: 834920	C	CA	AO=9	DP=147	frameshift_variant
03 Pool	06	03 Pool_06 plate_19 well	NO13G01020	ACTCTCGGCATATTCCTGCG	Mate efflux family protein	chr13: 328875	CGCA	C	AO=9	DP=201	disruptive_inframe_deletion
03 Pool	07	03 Pool_07 plate_02 well	NO11G02410	CCCTCCGTCGACCAGATGGA	Proteasome subunit beta type	chr11: 766660	AGAT	A	AO=2	DP=151	disruptive_inframe_deletion
03 Pool	07	03 Pool_07 plate_04 well	NO02G05950	GCATTGCATGAAGAAGTCTG	Unknown protein	chr2: 1586660	TCTG	CTG,TCT,TACTG	AO=1,1,1	DP=128	frameshift_variant
03 Pool	07	03 Pool_07 plate_05 well	NO06G01800	CAAGGCGAAGATACTAAGTG	Unknown protein	chr6: 549321	T	TA	AO=8	DP=141	frameshift_variant
03 Pool	07	03 Pool_07 plate_07 well	NO07G03420	AAGCTTAAGATCGGCGCCGG	Unknown protein	chr7: 942826	GC	G	AO=12	DP=127	frameshift_variant
03 Pool	07	03 Pool_07 plate_09 well	NO05G00900	AACCCACCTTTATCGTGTGG	Protein tyrosine phosphatase type iva protein 1	chr5: 279248	A	AA,AG	AO=2,2	DP=151	frameshift_variant
03 Pool	07	03 Pool_07 plate_10 well	NO15G03390	ACGCCGGGTTTCGATACCCA	NAD(P)-binding domain protein	chr15: 982874	TG	T	AO=9	DP=134	frameshift_variant
03 Pool	07	03 Pool_07 plate_16 well	NO07G02270	GAGAACAGTGCCATCCTCGG	Hsp90-like protein	chr7: 675264	C	CT	AO=3	DP=147	frameshift_variant
03 Pool	07	03 Pool_07 plate_17 well	NO07G01050	TGAGCTCGACGTATTCATGG	Actin related protein	chr7: 340241	A	AT	AO=1	DP=147	frameshift_variant
03 Pool	07	03 Pool_07 plate_21 well	NO14G01390	GACGACACAGAAACATTGGA	Unknown protein	chr14: 444636	CC	C,CCC,CCA	AO=2,2,2	DP=96	frameshift_variant
03 Pool	07	03 Pool_07 plate_23 well	NO09G01360	GCCTACACGATAGACCCCAA	Unknown protein;Unknown protein;Unknown protein;Unknown protein	chr9: 445700	TG	T	AO=5	DP=138	frameshift_variant
03 Pool	07	03 Pool_07 plate_24 well	NO03G00950	AAAGGGGGCGAGTGTCAAGG	Unknown protein	chr3: 311121	A	AA,AG	AO=3,3	DP=128	frameshift_variant
03 Pool	08	03 Pool_08 plate_01 well	NO03G04450	CAGCATCGAGAACTACGCGG	Unknown protein	chr3: 1285006	CCG	C,CCGT	AO=9,1	DP=159	frameshift_variant
03 Pool	08	03 Pool_08 plate_02 well	NO27G00860	GTATGGTTGAAAGCGCCTTG	Mini-chromosome maintenance complex-binding protein	chr27: 295383	AG	A	AO=1	DP=173	frameshift_variant
03 Pool	08	03 Pool_08 plate_03 well	NO09G03300	GCAGCACGAGTATCACAGAA	Protein phosphatase 2c ptc1	chr9: 949016	TCAC	T,TCACA	AO=1,17	DP=187	frameshift_variant
03 Pool	08	03 Pool_08 plate_03 well	NO09G02820	TGTTGAGGTTGTCAAAGACA	Lipase class 3	chr9: 835356	T	TA,TC	AO=15,1	DP=204	frameshift_variant
03 Pool	08	03 Pool_08 plate_04 well	NO09G02820	TGTTGAGGTTGTCAAAGACA	Lipase class 3	chr9: 835356	T	TA,TC	AO=15,1	DP=204	frameshift_variant
03 Pool	08	03 Pool_08 plate_05 well	NO03G02290	GATAGTCGGTGAAGGCCGCG	Peptidase s28 family protein	chr3: 669369	GCG	G,GC,GCGG	AO=1,10,6	DP=181	frameshift_variant
03 Pool	08	03 Pool_08 plate_07 well	NO25G01070	AACCGATGGAATGTGACTCG	Transcription elongation factor	chr25: 296628	GAG	G,GAGG,GAA	AO=2,1,1	DP=177	frameshift_variant
03 Pool	08	03 Pool_08 plate_08 well	NO10G02770	GGCGGCTATACGTGGCCCAG	Mpv17/PMP22	chr10: 762102	GC	G	AO=2	DP=117	frameshift_variant
03 Pool	08	03 Pool_08 plate_08 well	NO09G03300	GCAGCACGAGTATCACAGAA	Protein phosphatase 2c ptc1	chr9: 949016	TCAC	T,TCACA	AO=1,17	DP=187	frameshift_variant
03 Pool	08	03 Pool_08 plate_08 well	NO09G02820	TGTTGAGGTTGTCAAAGACA	Lipase class 3	chr9: 835356	T	TA,TC	AO=15,1	DP=204	frameshift_variant
03 Pool	08	03 Pool_08 plate_09 well	NO14G01540	GGAGCAATATGACCAGAAAG	Acyl transferase/acyl hydrolase/lysophospholipase	chr14: 486773	T	TG	AO=1	DP=216	frameshift_variant
03 Pool	08	03 Pool_08 plate_09 well	NO09G02820	TGTTGAGGTTGTCAAAGACA	Lipase class 3	chr9: 835356	T	TA,TC	AO=15,1	DP=204	frameshift_variant
03 Pool	08	03 Pool_08 plate_10 well	NO09G02820	TGTTGAGGTTGTCAAAGACA	Lipase class 3	chr9: 835356	T	TA,TC	AO=15,1	DP=204	frameshift_variant
03 Pool	08	03 Pool_08 plate_10 well	NO04G00860	AGACAGGAAGAAATGCGCGG	Pleckstriny domain-containing	chr4: 286215	C	CG	AO=1	DP=203	frameshift_variant
03 Pool	08	03 Pool_08 plate_10 well	NO03G02290	GATAGTCGGTGAAGGCCGCG	Peptidase s28 family protein	chr3: 669369	GCG	G,GC,GCGG	AO=1,10,6	DP=181	frameshift_variant
03 Pool	08	03 Pool_08 plate_11 well	NO08G01180	CAACATCTACCGAAACATGG	Rna polymerase ii ctd phosphatase	chr8: 369106	C	T	AO=2	DP=170	missense_variant
03 Pool	08	03 Pool_08 plate_13 well	NO01G00570	ACGACATCTGAACCCGTACA	Histone-lysine N-methyltransferase	chr1: 154157	CG	C,CGT	AO=1,6	DP=188	frameshift_variant
03 Pool	08	03 Pool_08 plate_13 well	NO10G02770	GGCGGCTATACGTGGCCCAG	Mpv17/PMP22	chr10: 762102	GC	G	AO=2	DP=117	frameshift_variant
03 Pool	08	03 Pool_08 plate_14 well	NO01G03400	TCCGGATCACAAGTACAAGG	Ph domain-containing protein;Ph domain-containing protein	chr1: 889996	TAC	T	AO=1	DP=213	frameshift_variant
03 Pool	08	03 Pool_08 plate_16 well	NO29G00840	AGAACAGAAGAGACACCACA	Protein rolling stone	chr29: 305567	A	AC	AO=1	DP=135	frameshift_variant
03 Pool	08	03 Pool_08 plate_17 well	NO27G00840	GATCGTACGGCATTGCTCAA	Unknown protein	chr27: 294771	G	GAA	AO=1	DP=197	frameshift_variant
03 Pool	08	03 Pool_08 plate_17 well	NO10G02770	GGCGGCTATACGTGGCCCAG	Mpv17/PMP22	chr10: 762102	GC	G	AO=2	DP=117	frameshift_variant
03 Pool	08	03 Pool_08 plate_22 well	NO05G03820	GATCTGGAAAGGGCACAGAG	Atp-dependent clp protease atp-binding subunit	chr5: 995093	A	AA,AC	AO=3,1	DP=229	frameshift_variant
03 Pool	08	03 Pool_08 plate_23 well	NO11G02660	TGGCACGATTACTCCCCACG	Ubiquitinyl hydrolase 1	chr11: 826247	CACG	C	AO=2	DP=201	disruptive_inframe_deletion
03 Pool	08	03 Pool_08 plate_24 well	NO25G00220	ACCATTGACACACGTCCCAG	ankyrin repeat family protein;ankyrin repeat family protein	chr25: 55073	TC	T	AO=1	DP=111	frameshift_variant
03 Pool	09	03 Pool_09 plate_01 well	NO19G00160	TAAGTCTGACCGCTTCCCCG	Carboxyl-terminal protease	chr19: 51839	CG	C	AO=2	DP=99	frameshift_variant
03 Pool	09	03 Pool_09 plate_03 well	NO09G02820	TGTTGAGGTTGTCAAAGACA	Lipase class 3	chr9: 835355	GTCTT	G	AO=6	DP=115	frameshift_variant
03 Pool	09	03 Pool_09 plate_04 well	NO09G02820	TGTTGAGGTTGTCAAAGACA	Lipase class 3	chr9: 835355	GTCTT	G	AO=6	DP=115	frameshift_variant
03 Pool	09	03 Pool_09 plate_07 well	NO21G01180	GTAAGAAGTCGAATTTGGGG	Histidine acid	chr21: 362122	TG	T	AO=1	DP=88	frameshift_variant
03 Pool	09	03 Pool_09 plate_08 well	NO09G02820	TGTTGAGGTTGTCAAAGACA	Lipase class 3	chr9: 835355	GTCTT	G	AO=6	DP=115	frameshift_variant
03 Pool	09	03 Pool_09 plate_09 well	NO05G00900	AACCCACCTTTATCGTGTGG	Protein tyrosine phosphatase type iva protein 1	chr5: 279248	A	AC	AO=1	DP=121	frameshift_variant
03 Pool	09	03 Pool_09 plate_09 well	NO14G00180	CACATCACGTCCATCGAACG	Unknown protein	chr14: 69513	A	AC	AO=15	DP=111	frameshift_variant
03 Pool	09	03 Pool_09 plate_10 well	NO09G02820	TGTTGAGGTTGTCAAAGACA	Lipase class 3	chr9: 835355	GTCTT	G	AO=6	DP=115	frameshift_variant
03 Pool	09	03 Pool_09 plate_12 well	NO14G00180	CACATCACGTCCATCGAACG	Unknown protein	chr14: 69513	A	AC	AO=15	DP=111	frameshift_variant
03 Pool	09	03 Pool_09 plate_15 well	NO05G00900	AACCCACCTTTATCGTGTGG	Protein tyrosine phosphatase type iva protein 1	chr5: 279248	A	AC	AO=1	DP=121	frameshift_variant
03 Pool	09	03 Pool_09 plate_17 well	NO13G01380	TGGAAGCAACAAGACCCTCG	Sugar fermentation stimulation protein	chr13: 423402	ACCCT	ACCT,A	AO=1,1	DP=99	frameshift_variant
03 Pool	09	03 Pool_09 plate_19 well	NO24G01690	CACTGAAGGTCAAGTCATGG	Tyrosyl-dna phosphodiesterase	chr24: 456996	TG	AAT,T	AO=1,1	DP=110	frameshift_variant&missense_variant
03 Pool	09	03 Pool_09 plate_23 well	NO27G01160	TCCCAGGCACAGTTACACAG	Gamma-glutamyltranspeptidase	chr27: 370997	CACTGTGTA	C,CACTGTATA	AO=1,1	DP=114	frameshift_variant
03 Pool	09	03 Pool_09 plate_24 well	NO05G03740	TTTGTCATCAGCGACAACCG	Tnf receptor-associated factor 4	chr5: 979586	GT	G	AO=1	DP=99	frameshift_variant
03 Pool	10	03 Pool_10 plate_01 well	NO25G00780	GACGATGACTTGTTGCTGGG	Ribosomal rna methyltransferase nop2-like protein	chr25: 215877	CCAG	C,CCAAAAG	AO=1,1	DP=123	conservative_inframe_insertion
03 Pool	10	03 Pool_10 plate_02 well	NO22G00690	TGGGCGTCCACACCCGACAG	LUC7 related protein	chr22: 233507	G	GT	AO=6	DP=151	frameshift_variant
03 Pool	10	03 Pool_10 plate_03 well	NO09G02820	TGTTGAGGTTGTCAAAGACA	Lipase class 3	chr9: 835357	CT	ACT,CC	AO=6,1	DP=125	frameshift_variant
03 Pool	10	03 Pool_10 plate_04 well	NO09G02820	TGTTGAGGTTGTCAAAGACA	Lipase class 3	chr9: 835357	CT	ACT,CC	AO=6,1	DP=125	frameshift_variant
03 Pool	10	03 Pool_10 plate_06 well	NO02G01290	AAATGGATCCTCCCACAACG	Metallopeptidase M24 family protein	chr2: 391335	CA	C,CAC	AO=2,1	DP=111	frameshift_variant
03 Pool	10	03 Pool_10 plate_07 well	NO23G01070	GCTTACGGTTCCTACCCAGG	RNA-binding (RRM/RBD/RNP motifs) family protein	chr23: 394953	ACC	AC,A,ACCCC	AO=1,3,2	DP=102	frameshift_variant
03 Pool	10	03 Pool_10 plate_08 well	NO09G02820	TGTTGAGGTTGTCAAAGACA	Lipase class 3	chr9: 835357	CT	ACT,CC	AO=6,1	DP=125	frameshift_variant
03 Pool	10	03 Pool_10 plate_09 well	NO29G01290	TGTATTGGAAGTAATCTGCG	Transmembrane amino acid transporter family protein	chr29: 412391	CAG	C	AO=1	DP=112	frameshift_variant
03 Pool	10	03 Pool_10 plate_09 well	NO09G02820	TGTTGAGGTTGTCAAAGACA	Lipase class 3	chr9: 835357	CT	ACT,CC	AO=6,1	DP=125	frameshift_variant
03 Pool	10	03 Pool_10 plate_10 well	NO09G02820	TGTTGAGGTTGTCAAAGACA	Lipase class 3	chr9: 835357	CT	ACT,CC	AO=6,1	DP=125	frameshift_variant
03 Pool	10	03 Pool_10 plate_10 well	NO23G01070	GCTTACGGTTCCTACCCAGG	RNA-binding (RRM/RBD/RNP motifs) family protein	chr23: 394953	ACC	AC,A,ACCCC	AO=1,3,2	DP=102	frameshift_variant
03 Pool	10	03 Pool_10 plate_11 well	NO16G01050	CTACAACATGAACCAAACCC	Unknown protein	chr16: 335211	G	GT,T	AO=1,1	DP=111	frameshift_variant
03 Pool	10	03 Pool_10 plate_12 well	NO22G00410	CTACTACAAAGAGGACACCG	Adenosine kinase	chr22: 152900	G	A	AO=2	DP=140	missense_variant
03 Pool	10	03 Pool_10 plate_15 well	NO14G02470	GGTAGCGTACTGATCCACTG	Methyltransferase	chr14: 739467	G	GC,GT	AO=1,2	DP=120	frameshift_variant
03 Pool	10	03 Pool_10 plate_16 well	NO11G02890	TGCCTTTCGTCGATCCCCTG	Eukaryotic translation initiation factor 2-alpha kinase 4	chr11: 908392	TC	T,TCC	AO=1,1	DP=109	frameshift_variant
03 Pool	10	03 Pool_10 plate_18 well	NO26G01260	GACGTGGTGATGATGAACAA	Heterogeneous nuclear;Heterogeneous nuclear	chr26: 406315	GGTGCTGGACGTGGTGATGATGAACAAGGGTGA	GGTGCTGGACGTGGTGATGA,G,GGTGCTGGACGTGGTGATGATGAAACAAGGGTGA	AO=2,1,3	DP=107	frameshift_variant
03 Pool	10	03 Pool_10 plate_20 well	NO15G01460	CTTTTCGTGGAAATGTAACG	CCR4-NOT transcription complex subunit 10	chr15: 412219	TA	T,TAA	AO=1,4	DP=130	frameshift_variant
03 Pool	10	03 Pool_10 plate_21 well	NO27G01350	CGGAATCAGGAACTACACAA	CD36 antigen	chr27: 434675	A	AC	AO=4	DP=114	frameshift_variant
03 Pool	10	03 Pool_10 plate_22 well	NO09G03130	TCGCGATAGAAATTGAAGCA	Unknown protein	chr9: 911605	C	CT	AO=2	DP=103	frameshift_variant
03 Pool	10	03 Pool_10 plate_23 well	NO02G02020	CAGTTTACCATCCTGGCCAA	Cop9 signalosome complex subunit 7a	chr2: 577681	TGGCCAG	T	AO=3	DP=86	conservative_inframe_deletion
03 Pool	10	03 Pool_10 plate_24 well	NO15G01100	GAAGCGGGAGATGAATCCGG	proline-rich family protein	chr15: 317633	T	TC	AO=1	DP=105	frameshift_variant
03 Pool	11	03 Pool_11 plate_01 well	NO05G00040	AGATCCCTATCCTGACCTGG	Mucin-2	chr5: 12328	G	GG,GT	AO=3,6	DP=188	frameshift_variant
03 Pool	11	03 Pool_11 plate_04 well	NO02G04340	CATCATCCAACAAAGAAGCA	60s ribosomal protein l37a	chr2: 1173093	CT	C	AO=8	DP=124	frameshift_variant
03 Pool	11	03 Pool_11 plate_06 well	NO09G03310	GTCCAGCTCGACGACTGCCG	Mitochondrial tricarboxylate transport protein;Mitochondrial tricarboxylate transport protein	chr9: 954277	G	GT	AO=5	DP=203	frameshift_variant
03 Pool	11	03 Pool_11 plate_09 well	NO28G01200	CGTGGTGTACATTATCAAGG	Serine/threonine-protein kinase SCH9	chr28: 375495	T	C	AO=2	DP=165	missense_variant
03 Pool	11	03 Pool_11 plate_09 well	NO26G00240	GTTAATTTGGTCTGACGATG	Acyl-coenzyme A oxidase	chr26: 85693	TC	T,CC	AO=1,2	DP=225	frameshift_variant
03 Pool	11	03 Pool_11 plate_10 well	NO02G04340	CATCATCCAACAAAGAAGCA	60s ribosomal protein l37a	chr2: 1173093	CT	C	AO=8	DP=124	frameshift_variant
03 Pool	11	03 Pool_11 plate_12 well	NO09G03310	GTCCAGCTCGACGACTGCCG	Mitochondrial tricarboxylate transport protein;Mitochondrial tricarboxylate transport protein	chr9: 954277	G	GT	AO=5	DP=203	frameshift_variant
03 Pool	11	03 Pool_11 plate_13 well	NO07G03220	CACGAGAGCTGCTGGCCTGG	Unknown protein	chr7: 889210	G	TG,C	AO=8,1	DP=179	frameshift_variant
03 Pool	11	03 Pool_11 plate_14 well	NO07G02040	AGACGATGATATCCGCGACG	Dna polymerase eta	chr7: 597333	CGA	A,CA,CGC	AO=4,1,1	DP=223	frameshift_variant
03 Pool	11	03 Pool_11 plate_15 well	NO09G00920	GCTAGGGCGGAAGTTTATGC	Dnaj subfamily b member 12;Dnaj subfamily b member 12;Dnaj subfamily b member 12	chr9: 320296	A	AC	AO=1	DP=224	frameshift_variant
03 Pool	11	03 Pool_11 plate_18 well	NO30G00010	GTTCAACATCAGGATTTACG	Zinc metalloendopeptidase	chr30: 4192	TGGAGGC	TGAGGC,AGGAGGC,TGGAGGA	AO=2,1,1	DP=213	frameshift_variant
03 Pool	11	03 Pool_11 plate_19 well	NO08G04330	GCGATCACGCCATCTCTCCG	Cellulase 2	chr8: 1266331	ATC	A	AO=1	DP=232	frameshift_variant
03 Pool	11	03 Pool_11 plate_20 well	NO29G01700	GCACATCCATAACACCATGG	Potassium channel protein;Potassium channel protein	chr29: 537076	A	AA,AG	AO=1,1	DP=188	frameshift_variant
03 Pool	11	03 Pool_11 plate_21 well	NO05G05190	AATAATATCAGGGAAAATGG	Unknown protein	chr5: 1360819	AAA	AACAT,AAAAA,AACAA,CAA	AO=1,13,1,1	DP=244	frameshift_variant
03 Pool	11	03 Pool_11 plate_22 well	NO14G02540	CTACGCGGATTTATTCTCGG	Unknown protein	chr14: 765810	G	T	AO=2	DP=205	missense_variant
03 Pool	11	03 Pool_11 plate_23 well	NO26G00240	GTTAATTTGGTCTGACGATG	Acyl-coenzyme A oxidase	chr26: 85693	TC	T,CC	AO=1,2	DP=225	frameshift_variant
03 Pool	11	03 Pool_11 plate_24 well	NO02G04550	AAAGGACCCAGCATCTCGTG	Amino acid permease family protein	chr2: 1232863	CTCG	CG,C	AO=1,1	DP=207	frameshift_variant
03 Pool	11	03 Pool_11 plate_24 well	NO30G00010	GTTCAACATCAGGATTTACG	Zinc metalloendopeptidase	chr30: 4192	TGGAGGC	TGAGGC,AGGAGGC,TGGAGGA	AO=2,1,1	DP=213	frameshift_variant
03 Pool	12	03 Pool_12 plate_01 well	NO03G03750	AATATCAACGAAAAGGTACG	U1 small nuclear ribonucleoprotein a	chr3: 1109573	T	TA	AO=1	DP=147	frameshift_variant
03 Pool	12	03 Pool_12 plate_05 well	NO19G00800	GCATTGCGAATGTGGCCTTG	Unknown protein	chr19: 278512	AG	G,A	AO=2,3	DP=188	frameshift_variant
03 Pool	12	03 Pool_12 plate_06 well	NO05G04870	ATTTATTAGTGATCAGAAGG	Domain of unknown function (DUF1995)	chr5: 1264413	A	AA,AC,AG	AO=5,3,2	DP=176	frameshift_variant
03 Pool	12	03 Pool_12 plate_07 well	NO06G02170	CGTTAGAGGATCCGAAACGA	Cytochrome c oxidase subunit VIa	chr6: 634733	G	GT,T	AO=9,1	DP=245	frameshift_variant
03 Pool	12	03 Pool_12 plate_09 well	NO09G02530	CTCAACGACCTCCACTTCCA	Unknown protein	chr9: 751463	GA	G	AO=1	DP=76	frameshift_variant
03 Pool	12	03 Pool_12 plate_12 well	NO19G02240	ACTCCGCTATTCTGACACGC	Unknown protein	chr19: 639927	G	GT	AO=1	DP=124	frameshift_variant
03 Pool	12	03 Pool_12 plate_12 well	NO25G01500	AGACTCGAAAATTCCCACAC	Myb transcription factor;Myb transcription factor	chr25: 434237	TCCC	ACCCA,TCCCA	AO=1,14	DP=136	frameshift_variant&missense_variant
03 Pool	12	03 Pool_12 plate_13 well	NO25G01500	AGACTCGAAAATTCCCACAC	Myb transcription factor;Myb transcription factor	chr25: 434237	TCCC	ACCCA,TCCCA	AO=1,14	DP=136	frameshift_variant&missense_variant
03 Pool	12	03 Pool_12 plate_14 well	NO16G01360	TCAATTAGAAGGGATGAGCG	Na+ h+ antiporter	chr16: 422181	GGATGA	G,GGATGAA	AO=1,1	DP=128	frameshift_variant
03 Pool	12	03 Pool_12 plate_15 well	NO02G02490	GCTATGGGTCGTATTAACAG	Atp-binding cassette superfamily	chr2: 690651	TA	T	AO=6	DP=191	frameshift_variant&stop_lost
03 Pool	12	03 Pool_12 plate_19 well	NO13G00730	ACAGCCACCGATGTTTCCAC	Transcription and mRNA export factor ENY2;Transcription and mRNA export factor ENY2	chr13: 243393	A	C	AO=2	DP=169	missense_variant&splice_region_variant
03 Pool	12	03 Pool_12 plate_20 well	NO11G01760	GATTACGAACTACCCCATGG	Serine threonine-protein kinase dclk3	chr11: 580788	CA	C,CAC	AO=5,1	DP=163	frameshift_variant
03 Pool	12	03 Pool_12 plate_21 well	NO07G03430	ATCGAGTTTACAGAGATCGA	Unknown protein	chr7: 948890	CATCG	C,CATCGA	AO=1,1	DP=205	frameshift_variant
03 Pool	12	03 Pool_12 plate_22 well	NO09G02140	GGGATGCTGACCATGACTGT	Major intrinsic protein	chr9: 655514	A	AC	AO=12	DP=212	frameshift_variant
03 Pool	12	03 Pool_12 plate_23 well	NO22G00190	AAATCGACCTCATCCCACAA	Unknown protein	chr22: 76766	TG	T,TGG,TGT	AO=3,6,1	DP=107	frameshift_variant
03 Pool	13	03 Pool_13 plate_05 well	NO20G02410	GAGGACGAGGTGTATAAACG	NAD kinase 2, mitochondrial	chr20: 736280	TA	T	AO=1	DP=183	frameshift_variant
03 Pool	13	03 Pool_13 plate_06 well	NO10G01600	TGTAGCCCAGACCTCATACG	Trna guanosine-2-o-methyltransferase trm11-like protein	chr10: 457493	T	TA	AO=4	DP=147	frameshift_variant&stop_gained
03 Pool	13	03 Pool_13 plate_10 well	NO22G01890	TTGTGTAAGGCGTTGGCAGA	Unknown protein	chr22: 567941	T	TC,TG	AO=1,1	DP=244	frameshift_variant
03 Pool	13	03 Pool_13 plate_12 well	NO09G03050	CACCACCCACCAAAGCATCG	Unknown protein	chr9: 892355	GGGCCACGATGCTTTGGTGGGT	G,GGGCCATGATGCTTTGGTGGGT	AO=1,1	DP=95	missense_variant
03 Pool	13	03 Pool_13 plate_13 well	NO07G02330	CAACATCACAGAAGACCACG	Unknown protein	chr7: 689679	ACCA	A,ACA,ACCG	AO=4,1,1	DP=182	frameshift_variant
03 Pool	13	03 Pool_13 plate_16 well	NO10G00940	TCAATGCAAGCATCATTACG	Unknown protein	chr10: 293088	A	AT	AO=6	DP=176	frameshift_variant
03 Pool	13	03 Pool_13 plate_17 well	NO02G02980	TGTACAAGACACATGCCTGG	Sulfotransferase family protein	chr2: 802173	C	CT	AO=2	DP=237	frameshift_variant
03 Pool	13	03 Pool_13 plate_20 well	NO13G03050	ACAGTCTCCTCCAACCCCAG	guanyl-nucleotide exchange factors;GTPase binding;GTP binding;guanyl-nucleotide exchange factors;GTPase binding;GTP binding	chr13: 867300	ACC	A	AO=1	DP=111	frameshift_variant
03 Pool	13	03 Pool_13 plate_23 well	NO17G00470	GGTATTCTAATGCCGCAAGG	Plastid lipid associated protein	chr17: 174697	C	CA,CAA	AO=2,3	DP=182	frameshift_variant
03 Pool	13	03 Pool_13 plate_13 well	NO03G01130	TTGGCAAAGATACCTTGCAG	Unknown protein	chr3: 351332	GC	G	AO=1	DP=151	frameshift_variant
03 Pool	14	03 Pool_14 plate_02 well	NO19G02320	TCGACTCGAGGAAGGTGAGG	Metallo-hydrolase/oxidoreductase superfamily protein	chr19: 671580	GCCTCA	G	AO=1	DP=37	frameshift_variant
03 Pool	14	03 Pool_14 plate_04 well	NO07G01730	GGCGGCATCATATGTTGTCA	Unknown protein	chr7: 521699	C	TC,T	AO=5,1	DP=152	frameshift_variant
03 Pool	14	03 Pool_14 plate_06 well	NO06G01170	ATCGAGCACCGGCCACACAG	Cupin 4 family protein	chr6: 369351	ACA	A,AA,ACAA,ACAT	AO=2,2,3,1	DP=140	frameshift_variant
03 Pool	14	03 Pool_14 plate_09 well	NO06G01890	TGCAAGCAATACCACGACAG	Subunit of golgi mannosyltransferase complex	chr6: 568781	A	T	AO=3	DP=161	missense_variant
03 Pool	14	03 Pool_14 plate_10 well	NO19G02320	TCGACTCGAGGAAGGTGAGG	Metallo-hydrolase/oxidoreductase superfamily protein	chr19: 671580	GCCTCA	G	AO=1	DP=37	frameshift_variant
03 Pool	14	03 Pool_14 plate_13 well	NO01G00880	GAGGCTTACCAGTATCATTG	Rrna processing protein	chr1: 225974	A	AT	AO=2	DP=126	frameshift_variant&stop_gained
03 Pool	14	03 Pool_14 plate_13 well	NO10G01040	ACCGAGATAGAAGAGCGTGG	PAP/25A-associated	chr10: 316711	C	CA	AO=1	DP=97	frameshift_variant
03 Pool	14	03 Pool_14 plate_14 well	NO26G00330	ACAAGGGGATACGAGGAGCA	Unknown protein	chr26: 103997	GGGATACGAGGAGCAGGGATGGGT	GGGATACGAGGCAGGGATGGGT,G,GGGATACGAGGAAGCAGGGATGGGT	AO=1,1,2	DP=138	frameshift_variant
03 Pool	14	03 Pool_14 plate_15 well	NO07G01730	GGCGGCATCATATGTTGTCA	Unknown protein	chr7: 521699	C	TC,T	AO=5,1	DP=152	frameshift_variant
03 Pool	14	03 Pool_14 plate_17 well	NO02G04730	CGCGTCTTCAAGAAACAAGG	Unknown protein	chr2: 1281403	GTT	TGTT,GTG	AO=3,1	DP=132	frameshift_variant
03 Pool	14	03 Pool_14 plate_18 well	NO12G03280	TCTTCACCACATACATCACG	Aldehyde dehydrogenase	chr12: 906772	TC	T	AO=2	DP=74	frameshift_variant
03 Pool	15	03 Pool_15 plate_01 well	NO07G01590	TGTCACAGGATATTACCGTG	Transmembrane E3 ubiquitin-protein ligase FLY2	chr7: 480684	AC	A	AO=22	DP=271	frameshift_variant
03 Pool	15	03 Pool_15 plate_01 well	NO16G00140	GGCTGGAAAGTAGTCCACTG	Tyramine beta-hydroxylase	chr16: 51861	T	A	AO=2	DP=180	synonymous_variant
03 Pool	15	03 Pool_15 plate_02 well	NO16G00140	GGCTGGAAAGTAGTCCACTG	Tyramine beta-hydroxylase	chr16: 51861	T	A	AO=2	DP=180	synonymous_variant
03 Pool	15	03 Pool_15 plate_03 well	NO22G00980	GACATGAACTACTACACCCG	Glucose-methanol-choline oxidoreductase	chr22: 307040	C	G	AO=7	DP=212	missense_variant
03 Pool	15	03 Pool_15 plate_03 well	NO16G00140	GGCTGGAAAGTAGTCCACTG	Tyramine beta-hydroxylase	chr16: 51861	T	A	AO=2	DP=180	synonymous_variant
03 Pool	15	03 Pool_15 plate_04 well	NO05G05450	AGTGTCCAGAGAAATCCCTG	Unknown protein	chr5: 1469987	AG	A	AO=10	DP=281	frameshift_variant
03 Pool	15	03 Pool_15 plate_04 well	NO16G00140	GGCTGGAAAGTAGTCCACTG	Tyramine beta-hydroxylase	chr16: 51861	T	A	AO=2	DP=180	synonymous_variant
03 Pool	15	03 Pool_15 plate_05 well	NO05G01650	TCGAGCTTATTCGACTCCAG	3-5 exonuclease domain-containing protein	chr5: 454971	TG	T,TGT	AO=2,4	DP=203	frameshift_variant&stop_gained
03 Pool	15	03 Pool_15 plate_05 well	NO16G00140	GGCTGGAAAGTAGTCCACTG	Tyramine beta-hydroxylase	chr16: 51861	T	A	AO=2	DP=180	synonymous_variant
03 Pool	15	03 Pool_15 plate_06 well	NO04G01340	ATGCCAGTTGATCCACACCG	Phosphoinositol transporter	chr4: 420409	AC	A	AO=1	DP=197	frameshift_variant
03 Pool	15	03 Pool_15 plate_06 well	NO03G00120	AGAAGCGCTCGATACCCGCG	Tetratricopeptide repeat family	chr3: 33584	TCGATACCCGCGCGGC	TCGATACCGCGCGGC,GGC,TCGATACCCGCGCGGA	AO=2,6,1	DP=234	frameshift_variant
03 Pool	15	03 Pool_15 plate_08 well	NO25G01430	ACAAGTCGAGCTGTAAACCA	F-box domain, cyclin-like protein	chr25: 404279	T	TT,G	AO=3,1	DP=223	frameshift_variant
03 Pool	15	03 Pool_15 plate_09 well	NO04G01340	ATGCCAGTTGATCCACACCG	Phosphoinositol transporter	chr4: 420409	AC	A	AO=1	DP=197	frameshift_variant
03 Pool	15	03 Pool_15 plate_09 well	NO16G00140	GGCTGGAAAGTAGTCCACTG	Tyramine beta-hydroxylase	chr16: 51861	T	A	AO=2	DP=180	synonymous_variant
03 Pool	15	03 Pool_15 plate_10 well	NO16G00140	GGCTGGAAAGTAGTCCACTG	Tyramine beta-hydroxylase	chr16: 51861	T	A	AO=2	DP=180	synonymous_variant
03 Pool	15	03 Pool_15 plate_11 well	NO16G00140	GGCTGGAAAGTAGTCCACTG	Tyramine beta-hydroxylase	chr16: 51861	T	A	AO=2	DP=180	synonymous_variant
03 Pool	15	03 Pool_15 plate_12 well	NO16G00140	GGCTGGAAAGTAGTCCACTG	Tyramine beta-hydroxylase	chr16: 51861	T	A	AO=2	DP=180	synonymous_variant
03 Pool	15	03 Pool_15 plate_13 well	NO16G00140	GGCTGGAAAGTAGTCCACTG	Tyramine beta-hydroxylase	chr16: 51861	T	A	AO=2	DP=180	synonymous_variant
03 Pool	15	03 Pool_15 plate_14 well	NO16G00140	GGCTGGAAAGTAGTCCACTG	Tyramine beta-hydroxylase	chr16: 51861	T	A	AO=2	DP=180	synonymous_variant
03 Pool	15	03 Pool_15 plate_15 well	NO16G00140	GGCTGGAAAGTAGTCCACTG	Tyramine beta-hydroxylase	chr16: 51861	T	A	AO=2	DP=180	synonymous_variant
03 Pool	15	03 Pool_15 plate_16 well	NO16G00140	GGCTGGAAAGTAGTCCACTG	Tyramine beta-hydroxylase	chr16: 51861	T	A	AO=2	DP=180	synonymous_variant
03 Pool	15	03 Pool_15 plate_17 well	NO17G00220	CTTGCCCATAGTGACCCATG	Major intrinsic protein	chr17: 77955	AC	A,ACC	AO=1,3	DP=214	frameshift_variant
03 Pool	15	03 Pool_15 plate_18 well	NO16G00140	GGCTGGAAAGTAGTCCACTG	Tyramine beta-hydroxylase	chr16: 51861	T	A	AO=2	DP=180	synonymous_variant
03 Pool	15	03 Pool_15 plate_19 well	NO05G04590	AGTAGAGGCCCATATCCACG	Cell adhesion domain-containing protein	chr5: 1194530	GG	G,GGT	AO=7,1	DP=248	frameshift_variant
03 Pool	15	03 Pool_15 plate_19 well	NO16G00140	GGCTGGAAAGTAGTCCACTG	Tyramine beta-hydroxylase	chr16: 51861	T	A	AO=2	DP=180	synonymous_variant
03 Pool	15	03 Pool_15 plate_20 well	NO16G00140	GGCTGGAAAGTAGTCCACTG	Tyramine beta-hydroxylase	chr16: 51861	T	A	AO=2	DP=180	synonymous_variant
03 Pool	15	03 Pool_15 plate_21 well	NO12G01730	AGCGTTGGAAGTTGTCGTTG	Unknown protein	chr12: 518251	AGTTGTCGTTGTG	A	AO=1	DP=219	disruptive_inframe_deletion
03 Pool	15	03 Pool_15 plate_21 well	NO16G00140	GGCTGGAAAGTAGTCCACTG	Tyramine beta-hydroxylase	chr16: 51861	T	A	AO=2	DP=180	synonymous_variant
03 Pool	15	03 Pool_15 plate_22 well	NO01G02040	AGGATACAGTCTGAAGCCGG	Unknown protein	chr1: 517804	CCGG	C,CCGGG	AO=1,9	DP=225	frameshift_variant
03 Pool	15	03 Pool_15 plate_23 well	NO16G00140	GGCTGGAAAGTAGTCCACTG	Tyramine beta-hydroxylase	chr16: 51861	T	A	AO=2	DP=180	synonymous_variant
03 Pool	16	03 Pool_16 plate_01 well	NO20G00870	TATGAATGCAAGGATTGTGG	Unknown protein	chr20: 287046	CCA	C	AO=5	DP=168	frameshift_variant
03 Pool	16	03 Pool_16 plate_05 well	NO17G02020	CGATCATCCAGATGGCCGAG	Unknown protein	chr17: 585457	G	GC	AO=9	DP=237	frameshift_variant
03 Pool	16	03 Pool_16 plate_06 well	NO17G01180	GTATGATGGTGAGATGTGTG	Otu-like cysteine type protease	chr17: 373943	CAT	TT,T,CAC	AO=1,4,1	DP=172	frameshift_variant
03 Pool	16	03 Pool_16 plate_07 well	NO21G02110	TGACAGACGCAAATGCCACG	Unknown protein	chr21: 625525	ACG	G,CACG,ACT	AO=1,2,1	DP=188	frameshift_variant
03 Pool	16	03 Pool_16 plate_08 well	NO13G01440	AAAGCTAACTTGTGAAATTG	Unknown protein	chr13: 433192	ATT	AT,A	AO=2,1	DP=218	frameshift_variant
03 Pool	16	03 Pool_16 plate_13 well	NO10G00500	TCTTGTGAAGGAGACGCACG	FKBP-like peptidyl-prolyl cis-trans isomerase family protein	chr10: 179898	TGC	T	AO=11	DP=236	frameshift_variant
03 Pool	16	03 Pool_16 plate_14 well	NO18G02450	CCGCTGTCGTTGCTGCACGG	Methylmalonate-semialdehyde dehydrogenase [acylating], mitochondrial	chr18: 798262	A	AA,AC	AO=1,4	DP=165	frameshift_variant
03 Pool	16	03 Pool_16 plate_15 well	NO06G02540	TAACCCCGTCCGCAACATCG	Tyrosine aminotransferase	chr6: 714924	G	A	AO=2	DP=210	missense_variant
03 Pool	16	03 Pool_16 plate_17 well	NO30G00370	CTACAAATACACCTACGAGG	Lipase class 3;Lipase class 3;Lipase class 3	chr30: 163644	G	GA	AO=1	DP=44	frameshift_variant
03 Pool	16	03 Pool_16 plate_18 well	NO15G00850	CCCACCAGTGAAAAAAACAG	Adipocyte plasma membrane-associated	chr15: 262088	CAGTGAAAAAAAC	CAGTGAAAAAA,CAGTGAAAAAAA,C	AO=1,1,1	DP=162	frameshift_variant
03 Pool	16	03 Pool_16 plate_20 well	NO07G02810	CTTAATGCAGAAAACGTCTG	LETM1-like protein	chr7: 799550	GACGTTTTCTGCAT	G	AO=4	DP=195	frameshift_variant
03 Pool	16	03 Pool_16 plate_21 well	NO03G00280	TTGCATGAATACGTGCTCAA	Pentatricopeptide repeat contining protein	chr3: 87208	GCT	G	AO=3	DP=141	frameshift_variant
03 Pool	16	03 Pool_16 plate_21 well	NO16G02930	AGTGCTGCTCCTGAAGAACG	Unknown protein	chr16: 854039	GA	G	AO=7	DP=209	frameshift_variant
03 Pool	16	03 Pool_16 plate_22 well	NO21G00370	GGTGCGCAATGGTTATACGT	Short-chain dehydrogenase	chr21: 113810	T	TTATATA	AO=6	DP=140	disruptive_inframe_insertion
03 Pool	16	03 Pool_16 plate_23 well	NO27G01500	ACAAGAAGGAGAGTACGTCA	Unknown protein	chr27: 500827	G	GA	AO=2	DP=193	frameshift_variant
03 Pool	17	03 Pool_17 plate_01 well	NO15G00190	TCTTTTGCGACACATCACCG	Unknown protein	chr15: 47678	GG	GGTG,GGT,AG	AO=2,13,1	DP=289	frameshift_variant
03 Pool	17	03 Pool_17 plate_03 well	NO09G01830	CTCTTATCATCGCTACAAGG	Glycosyl hydrolase family 1	chr9: 561579	A	CCAG,G	AO=6,11	DP=247	missense_variant&conservative_inframe_insertion
03 Pool	17	03 Pool_17 plate_05 well	NO07G01020	ATTACCATCATCATTTCCTG	Gcn5-related n-acetyltransferase	chr7: 331528	AG	A	AO=13	DP=160	frameshift_variant
03 Pool	17	03 Pool_17 plate_06 well	NO19G02190	ACATCGCCGAGGTTACATGG	Unknown protein	chr19: 627141	T	CC,CT	AO=1,2	DP=196	frameshift_variant
03 Pool	17	03 Pool_17 plate_07 well	NO26G01650	ACCCTATAAGCGTCAAACGG	R-snare vamp72-family	chr26: 544416	CG	ACG,CA	AO=7,1	DP=237	frameshift_variant
03 Pool	17	03 Pool_17 plate_07 well	NO15G00190	TCTTTTGCGACACATCACCG	Unknown protein	chr15: 47678	GG	GGTG,GGT,AG	AO=2,13,1	DP=289	frameshift_variant
03 Pool	17	03 Pool_17 plate_08 well	NO20G01200	TGTTCACCGAGGTAGCACCA	Beta-lactamase domain protein	chr20: 367929	GGT	G	AO=12	DP=247	frameshift_variant
03 Pool	17	03 Pool_17 plate_08 well	NO10G02770	GGCGGCTATACGTGGCCCAG	Mpv17/PMP22	chr10: 762102	GC	G,GCC	AO=3,1	DP=123	frameshift_variant
03 Pool	17	03 Pool_17 plate_10 well	NO04G00420	GAGGACCACGTCACCCACAG	Unknown protein	chr4: 168648	TGT	T,TGTT,TGG	AO=1,2,1	DP=190	frameshift_variant
03 Pool	17	03 Pool_17 plate_13 well	NO10G02770	GGCGGCTATACGTGGCCCAG	Mpv17/PMP22	chr10: 762102	GC	G,GCC	AO=3,1	DP=123	frameshift_variant
03 Pool	17	03 Pool_17 plate_13 well	NO25G00100	ATAAGTCAGACACACGTACA	Unknown protein	chr25: 12758	ACGTG	AGTG,A,AACGTG,ACGCG	AO=1,1,11,1	DP=221	frameshift_variant
03 Pool	17	03 Pool_17 plate_16 well	NO25G02110	TCTTGGGTAGAGGATGCAGG	Serine threonine-protein kinase smg1-like protein	chr25: 675983	T	TG	AO=6	DP=348	frameshift_variant
03 Pool	17	03 Pool_17 plate_21 well	NO02G02570	AGTGGCAAAAGGATGACAGG	Unknown protein	chr2: 718890	TGACAGGCGGAC	T	AO=5	DP=191	frameshift_variant
03 Pool	17	03 Pool_17 plate_24 well	NO18G00980	ACCCAGGATCAGGCACAAGG	Unknown protein	chr18: 354398	CTCCTTGTGCCTGA	CTGA,C,CTCCTTGCCTGA	AO=1,5,1	DP=179	frameshift_variant
03 Pool	18	03 Pool_18 plate_01 well	NO07G04120	CAAAAATGGACATCAACCCT	ER membrane protein complex subunit 6	chr7: 1151745	TC	CTC,TA	AO=3,1	DP=224	frameshift_variant
03 Pool	18	03 Pool_18 plate_02 well	NO07G01070	TGGCGGAAGTGGGAGAACCG	Ccr4-not transcription	chr7: 351716	AA	A,AAT	AO=8,1	DP=156	frameshift_variant
03 Pool	18	03 Pool_18 plate_04 well	NO17G00320	GGCGCAGGGCGAGATTGCCA	Endothelial differentiation-related factor 1	chr17: 120553	G	GC,GCC	AO=8,2	DP=178	frameshift_variant
03 Pool	18	03 Pool_18 plate_06 well	NO06G02990	TTTAGTGATATAGAACGAGT	Unknown protein	chr6: 854133	CG	C	AO=12	DP=199	frameshift_variant
03 Pool	18	03 Pool_18 plate_07 well	NO03G01600	TAATGAGCGCGAATTCCGTG	Ubiquitin-associated/translation elongation factor EF1B	chr3: 495372	ATTC	TTT,ATT,ATTCC	AO=1,4,2	DP=126	frameshift_variant&missense_variant
03 Pool	18	03 Pool_18 plate_09 well	NO11G03420	CAAGACGAGCAGCAACACCG	Unknown protein	chr11: 1096560	GGT	G,GGTT	AO=1,3	DP=205	frameshift_variant
03 Pool	18	03 Pool_18 plate_10 well	NO09G02260	TGGCTGGGTGAACTTGAAGC	Unknown protein	chr9: 682340	G	GA	AO=1	DP=175	frameshift_variant
03 Pool	18	03 Pool_18 plate_11 well	NO07G03150	AAAGCCAGTCTACATCATCG	Phosphatidate cytidylyltransferase	chr7: 874085	TCA	ACAG,TC,TCAC,TCAG	AO=1,1,1,4	DP=205	frameshift_variant&missense_variant
03 Pool	18	03 Pool_18 plate_11 well	NO05G03610	TCATTTGATGCACAAGACGA	Dihydrolipoamide acetyltransferase component of pyruvate dehydrogenase complex	chr5: 953619	AGAC	A	AO=1	DP=171	disruptive_inframe_deletion
03 Pool	18	03 Pool_18 plate_14 well	NO03G01010	GGCGGATTACGTCGTTCACC	Enyol-CoA hydratase;Enyol-CoA hydratase	chr3: 326425	G	GT	AO=1	DP=184	frameshift_variant
03 Pool	18	03 Pool_18 plate_16 well	NO17G02850	TAAAGCTTCGAGGAGAAGAG	Unknown protein	chr17: 834094	G	GA	AO=1	DP=246	frameshift_variant
03 Pool	18	03 Pool_18 plate_20 well	NO04G01550	GCTTGCGTTGGCAATGACCG	Peptidylprolyl isomerase	chr4: 473632	ATGA	TGA,ATG,ATGAA	AO=1,1,1	DP=202	frameshift_variant
03 Pool	18	03 Pool_18 plate_21 well	NO29G01490	TCTCGAGCAGACCCCGTGAG	Zn(2)-C6 fungal-type DNA-binding domain protein	chr29: 473539	G	GT	AO=1	DP=164	frameshift_variant
03 Pool	18	03 Pool_18 plate_22 well	NO04G01890	GATCCTGTTATCGAACAAGG	Ww domain binding protein 4 (Formin binding protein 21)	chr4: 550704	GCCT	G,GCAT	AO=3,1	DP=197	missense_variant
03 Pool	19	03 Pool_19 plate_02 well	NO09G02320	GCTGCGATCTGAGACGACGG	Unknown protein	chr9: 697261	CCGT	C,CCGCT,CCGTT	AO=1,1,1	DP=114	frameshift_variant
03 Pool	19	03 Pool_19 plate_04 well	NO03G02230	TCGAATAGACGACAACAACG	RNase L inhibitor protein-related	chr3: 659526	G	GT	AO=2	DP=112	frameshift_variant
03 Pool	19	03 Pool_19 plate_06 well	NO30G00070	TGCCCGGTCAGCTCTATGAG	Unknown protein	chr30: 30017	A	ATG	AO=2	DP=136	frameshift_variant
03 Pool	19	03 Pool_19 plate_08 well	NO15G01450	AAGCAGCAAGATGACGATGT	CCR4-NOT transcription complex subunit 10	chr15: 410703	C	CA	AO=5	DP=98	frameshift_variant
03 Pool	19	03 Pool_19 plate_12 well	NO15G01450	AAGCAGCAAGATGACGATGT	CCR4-NOT transcription complex subunit 10	chr15: 410703	C	CA	AO=5	DP=98	frameshift_variant
03 Pool	19	03 Pool_19 plate_18 well	NO04G04420	TCGTCTCAAAGCAAACACAG	Acyl-dehydrogenase	chr4: 1198367	ACCTCGTCGTCTCAAAGCAAACACAGCGGAGCCCTC	A,ACCTCGTCGTCTCAAAGCAAACAACAGCGGAGCCCTC,ACCTCGTCGTCTCAAAGCAAACAAAGCGGAGCCCTC	AO=1,1,5	DP=125	frameshift_variant
03 Pool	19	03 Pool_19 plate_19 well	NO06G02010	GAATATGGAAGGAAGCAACG	Protein phosphatase 2C family protein	chr6: 594187	GAAGC	G	AO=1	DP=115	frameshift_variant
03 Pool	19	03 Pool_19 plate_20 well	NO19G00090	TAGCGCTCCTTGCGACTCTG	Unknown protein;Unknown protein;Unknown protein	chr19: 20696	G	GAC	AO=4	DP=133	frameshift_variant
03 Pool	19	03 Pool_19 plate_21 well	NO16G01390	TATCCCGCTTGACCGCCAAG	Unknown protein	chr16: 428316	CC	C,CCC,CCA	AO=4,2,2	DP=138	frameshift_variant
03 Pool	19	03 Pool_19 plate_22 well	NO06G04480	AAGCAGATCTTCGTTGACGG	Glycosyl transferase family 1 protein;Glycosyl transferase family 1 protein	chr6: 1266521	TGA	T,TCA	AO=1,4	DP=128	frameshift_variant
03 Pool	19	03 Pool_19 plate_23 well	NO09G00580	GCAGGGTTTCTACCACGACA	L-aminoadipate-semialdehyde dehydrogenase-phosphopantetheinyl	chr9: 227550	CG	C	AO=5	DP=116	frameshift_variant
03 Pool	20	03 Pool_20 plate_01 well	NO10G02360	AGCCAATAAGAAGCACATCA	Exopolyphosphatase PRUNE1;Exopolyphosphatase PRUNE1	chr10: 647787	A	AA,AC	AO=4,6	DP=201	frameshift_variant
03 Pool	20	03 Pool_20 plate_02 well	NO05G01790	ATGCGCGCAACGAATCAGGA	F-actin-capping protein subunit beta	chr5: 491198	ACGAATC	CCGA,ACGA,ACGAATCA,ACGAATCAT	AO=1,2,1,2	DP=178	frameshift_variant
03 Pool	20	03 Pool_20 plate_04 well	NO07G01280	CAGATCACCCACACCCCCGG	Unknown protein	chr7: 405963	AC	A	AO=2	DP=198	frameshift_variant
03 Pool	20	03 Pool_20 plate_05 well	NO06G01490	TCACTCCTCTGTATACCTCG	Unknown protein	chr6: 472557	GTA	TA,TTA,GTG	AO=1,1,1	DP=130	frameshift_variant
03 Pool	20	03 Pool_20 plate_05 well	NO05G01790	ATGCGCGCAACGAATCAGGA	F-actin-capping protein subunit beta	chr5: 491198	ACGAATC	CCGA,ACGA,ACGAATCA,ACGAATCAT	AO=1,2,1,2	DP=178	frameshift_variant
03 Pool	20	03 Pool_20 plate_09 well	NO03G03170	CTGGGAAGCGAGCAACATGG	Phosphatidylinositol 4-kinase	chr3: 944159	A	AT	AO=9	DP=182	frameshift_variant
03 Pool	20	03 Pool_20 plate_09 well	NO01G01580	GCTGAGTACCTGAACCCTGG	Cysteine synthase	chr1: 399092	AC	A	AO=11	DP=162	frameshift_variant
03 Pool	20	03 Pool_20 plate_10 well	NO05G03960	ATTCGTGGTATATCCAACCG	Rna recognition motif-containing protein	chr5: 1025231	TTG	TG,CTTG,TTTG,TTA	AO=1,1,2,1	DP=213	frameshift_variant
03 Pool	20	03 Pool_20 plate_11 well	NO19G01040	CCCTGTCACTACCTTCGCCG	Unknown protein	chr19: 352888	CG	C,CGC	AO=1,2	DP=176	frameshift_variant
03 Pool	20	03 Pool_20 plate_12 well	NO14G01280	AACCAAGAAGGTATCCCCAA	Snare associated golgi protein	chr14: 412751	TG	T	AO=7	DP=178	frameshift_variant
03 Pool	20	03 Pool_20 plate_13 well	NO05G04990	TAACGTCCATCTGATCCACG	Regulator of nonsense transcripts 2	chr5: 1301410	TG	T	AO=1	DP=95	frameshift_variant
03 Pool	20	03 Pool_20 plate_14 well	NO07G01280	CAGATCACCCACACCCCCGG	Unknown protein	chr7: 405963	AC	A	AO=2	DP=198	frameshift_variant
03 Pool	20	03 Pool_20 plate_15 well	NO07G01280	CAGATCACCCACACCCCCGG	Unknown protein	chr7: 405963	AC	A	AO=2	DP=198	frameshift_variant
03 Pool	20	03 Pool_20 plate_17 well	NO05G03130	CATGTTCAAGGCTATACACG	Unknown protein	chr5: 813789	C	CC,CT	AO=1,3	DP=219	frameshift_variant
03 Pool	20	03 Pool_20 plate_18 well	NO02G06120	GTGGATGTCAGTAGCTCTCA	Unknown protein;Unknown protein	chr2: 1636976	CTC	C,CTCG	AO=6,1	DP=125	frameshift_variant
03 Pool	20	03 Pool_20 plate_18 well	NO05G03960	ATTCGTGGTATATCCAACCG	Rna recognition motif-containing protein	chr5: 1025231	TTG	TG,CTTG,TTTG,TTA	AO=1,1,2,1	DP=213	frameshift_variant
03 Pool	20	03 Pool_20 plate_19 well	NO05G01790	ATGCGCGCAACGAATCAGGA	F-actin-capping protein subunit beta	chr5: 491198	ACGAATC	CCGA,ACGA,ACGAATCA,ACGAATCAT	AO=1,2,1,2	DP=178	frameshift_variant
03 Pool	20	03 Pool_20 plate_20 well	NO10G01320	TTCACCAGTTATGATCGAGG	Transcription factor iiic-gamma subunit	chr10: 387968	TCGA	TGA,T	AO=1,1	DP=166	frameshift_variant
03 Pool	20	03 Pool_20 plate_21 well	NO10G01320	TTCACCAGTTATGATCGAGG	Transcription factor iiic-gamma subunit	chr10: 387968	TCGA	TGA,T	AO=1,1	DP=166	frameshift_variant
03 Pool	20	03 Pool_20 plate_22 well	NO10G01320	TTCACCAGTTATGATCGAGG	Transcription factor iiic-gamma subunit	chr10: 387968	TCGA	TGA,T	AO=1,1	DP=166	frameshift_variant
03 Pool	20	03 Pool_20 plate_22 well	NO03G03170	CTGGGAAGCGAGCAACATGG	Phosphatidylinositol 4-kinase	chr3: 944159	A	AT	AO=9	DP=182	frameshift_variant
03 Pool	20	03 Pool_20 plate_23 well	NO01G01580	GCTGAGTACCTGAACCCTGG	Cysteine synthase	chr1: 399092	AC	A	AO=11	DP=162	frameshift_variant
03 Pool	20	03 Pool_20 plate_24 well	NO04G03140	ACATTCCATCTACACCGCCG	Sphingosine kinase	chr4: 858154	ACCG	A	AO=5	DP=217	disruptive_inframe_deletion
03 Pool	21	03 Pool_21 plate_02 well	NO01G03220	GATGAGAGGAAAAAGACCAG	5-cytosolic iii;5-cytosolic iii	chr1: 846726	TG	T	AO=8	DP=179	frameshift_variant
03 Pool	21	03 Pool_21 plate_06 well	NO14G01660	CGATTGCAATGTGTGCCTGT	Ring finger protein	chr14: 516718	ACAGG	A,ACAGGG,ACACA	AO=1,1,2	DP=227	frameshift_variant
03 Pool	21	03 Pool_21 plate_08 well	NO03G03800	TGTCAATGGTCCTTCCACTG	Diacylglycerol kinase	chr3: 1118682	G	C	AO=2	DP=175	missense_variant
03 Pool	21	03 Pool_21 plate_11 well	NO07G01440	CTGTACTTGACCATGCATGG	Six-bladed beta-propeller TolB-like protein	chr7: 440892	A	AT	AO=2	DP=190	frameshift_variant
03 Pool	21	03 Pool_21 plate_12 well	NO30G01100	GGTTTATGTCAAGTGCCGCG	U6 snRNA-associated Sm-like protein LSm3	chr30: 406297	GCCG	G,GC	AO=2,1	DP=144	frameshift_variant
03 Pool	21	03 Pool_21 plate_13 well	NO14G03180	GGGGAACAAAAATGCTCCGA	Unknown protein	chr14: 954852	CG	C	AO=3	DP=156	frameshift_variant
03 Pool	21	03 Pool_21 plate_15 well	NO18G01280	ATGTGACCCTGAGCATTCGG	heat shock protein 17.6A	chr18: 437831	AT	A,ATT	AO=4,1	DP=225	frameshift_variant
03 Pool	21	03 Pool_21 plate_15 well	NO01G04900	GGTACAAGGAAGTTGTGACG	Unknown protein	chr1: 1299698	T	TG	AO=2	DP=213	frameshift_variant
03 Pool	21	03 Pool_21 plate_16 well	NO11G01920	GATGGCTACAAAGAGCAACA	Mitochodrial transcription termination factor	chr11: 627973	CA	C,CAA,CAAA	AO=1,1,2	DP=217	frameshift_variant
03 Pool	21	03 Pool_21 plate_17 well	NO16G00720	TGACCCTACACCTCTCGCAG	Unknown protein	chr16: 244395	G	GC	AO=3	DP=168	frameshift_variant
03 Pool	21	03 Pool_21 plate_18 well	NO24G01190	ACAGACGAGTATTATCGAGG	Unknown protein	chr24: 326043	GA	A,G,GGA	AO=1,1,1	DP=142	frameshift_variant
03 Pool	21	03 Pool_21 plate_21 well	NO02G06140	TTATGTACGAGACGTCACCG	Unknown protein	chr2: 1645857	C	CA	AO=5	DP=158	frameshift_variant
03 Pool	21	03 Pool_21 plate_22 well	NO09G02380	ATATTACGTTCCTCTCTCGG	Metallo-beta-lactamase	chr9: 715845	C	CTCT	AO=7	DP=220	disruptive_inframe_insertion
03 Pool	22	03 Pool_22 plate_07 well	NO01G04620	GGTGGTCTCGAAGCTTGTTG	Ribonucleoprotein LSM	chr1: 1219286	GCAA	T,G	AO=1,7	DP=175	conservative_inframe_deletion&synonymous_variant
03 Pool	22	03 Pool_22 plate_08 well	NO02G04160	TGCATTGTGAAGGTGAACGT	transducin family protein / WD-40 repeat family protein	chr2: 1136424	G	GT	AO=2	DP=161	frameshift_variant
03 Pool	22	03 Pool_22 plate_09 well	NO22G01400	ATGATGCAATTCAGTCCCGG	Hypersensitive-induced response protein;Hypersensitive-induced response protein;Hypersensitive-induced response protein	chr22: 416389	TC	T	AO=1	DP=190	frameshift_variant
03 Pool	22	03 Pool_22 plate_10 well	NO02G04480	AGCCCTACTCCTCCACCAGG	protein kinase family protein	chr2: 1214338	T	TG	AO=1	DP=125	frameshift_variant
03 Pool	22	03 Pool_22 plate_11 well	NO07G04480	CGTTTCCTGTGCATATGGTG	Actin cross-linking	chr7: 1255921	AC	A	AO=7	DP=182	frameshift_variant
03 Pool	22	03 Pool_22 plate_14 well	NO26G00020	GCATAGCGATTATAGGAGGG	Winged helix-turn-helix transcription repressor	chr26: 4712	CCCT	C,CCCC	AO=2,1	DP=156	missense_variant
03 Pool	22	03 Pool_22 plate_16 well	NO11G00530	GGATGGGGTGAAACTCATCA	Unknown protein	chr11: 230729	G	GA,T	AO=9,1	DP=231	frameshift_variant
03 Pool	22	03 Pool_22 plate_18 well	NO19G00780	GCTCGAACGCAACAACACGG	Unknown protein	chr19: 269272	CA	C	AO=1	DP=163	frameshift_variant
03 Pool	22	03 Pool_22 plate_20 well	NO27G01070	CAAGACTGCAATGTTAATGG	Thyroid adenoma-associated protein homolog	chr27: 352656	A	AC	AO=9	DP=222	frameshift_variant
03 Pool	22	03 Pool_22 plate_21 well	NO13G02790	ATTGAGCTGAGAGCGAGGGG	Ssm4 like ring finger protein	chr13: 774740	CCCC	C,CCCT	AO=1,1	DP=127	missense_variant
03 Pool	22	03 Pool_22 plate_22 well	NO19G00780	GCTCGAACGCAACAACACGG	Unknown protein	chr19: 269272	CA	C	AO=1	DP=163	frameshift_variant
03 Pool	22	03 Pool_22 plate_24 well	NO15G02130	GTACGTGCATCACGCTACGG	Unknown protein	chr15: 597167	AC	A	AO=3	DP=263	frameshift_variant
03 Pool	22	03 Pool_22 plate_24 well	NO22G01400	ATGATGCAATTCAGTCCCGG	Hypersensitive-induced response protein;Hypersensitive-induced response protein;Hypersensitive-induced response protein	chr22: 416389	TC	T	AO=1	DP=190	frameshift_variant
03 Pool	22	03 Pool_22 plate_22 well	NO06G04520	TCTACCGGAATGGAGACGAG	Unknown protein	chr6: 1279427	C	CG	AO=1	DP=200	frameshift_variant
03 Pool	23	03 Pool_23 plate_01 well	NO25G02130	GTACCCCACCAACGATCTGG	Unknown protein	chr25: 682740	G	T	AO=2	DP=110	missense_variant
03 Pool	23	03 Pool_23 plate_02 well	NO25G02130	GTACCCCACCAACGATCTGG	Unknown protein	chr25: 682740	G	T	AO=2	DP=110	missense_variant
03 Pool	23	03 Pool_23 plate_03 well	NO08G01900	CGATTAAGAAAAAAGTGCAG	Epidermal growth factor-like domain protein	chr8: 577048	G	GCC	AO=1	DP=221	frameshift_variant
03 Pool	23	03 Pool_23 plate_05 well	NO25G02130	GTACCCCACCAACGATCTGG	Unknown protein	chr25: 682740	G	T	AO=2	DP=110	missense_variant
03 Pool	23	03 Pool_23 plate_06 well	NO25G02130	GTACCCCACCAACGATCTGG	Unknown protein	chr25: 682740	G	T	AO=2	DP=110	missense_variant
03 Pool	23	03 Pool_23 plate_07 well	NO25G02130	GTACCCCACCAACGATCTGG	Unknown protein	chr25: 682740	G	T	AO=2	DP=110	missense_variant
03 Pool	23	03 Pool_23 plate_08 well	NO02G01210	CAGCATCGTTAACATGAACG	Palmitoyltransferase	chr2: 371284	A	AG	AO=5	DP=223	frameshift_variant
03 Pool	23	03 Pool_23 plate_08 well	NO25G02130	GTACCCCACCAACGATCTGG	Unknown protein	chr25: 682740	G	T	AO=2	DP=110	missense_variant
03 Pool	23	03 Pool_23 plate_09 well	NO04G01420	TTGAGCGTGATAATGTGCAG	Unknown protein	chr4: 444870	CTGCA	TGCA,CTGCC	AO=1,1	DP=175	frameshift_variant
03 Pool	23	03 Pool_23 plate_09 well	NO25G02130	GTACCCCACCAACGATCTGG	Unknown protein	chr25: 682740	G	T	AO=2	DP=110	missense_variant
03 Pool	23	03 Pool_23 plate_11 well	NO24G01350	CCCTCTCCTAAGGAAAAACG	Ankyrin repeat domain protein	chr24: 366850	GA	G,GAAA	AO=3,1	DP=119	frameshift_variant
03 Pool	23	03 Pool_23 plate_12 well	NO25G02130	GTACCCCACCAACGATCTGG	Unknown protein	chr25: 682740	G	T	AO=2	DP=110	missense_variant
03 Pool	23	03 Pool_23 plate_13 well	NO25G02130	GTACCCCACCAACGATCTGG	Unknown protein	chr25: 682740	G	T	AO=2	DP=110	missense_variant
03 Pool	23	03 Pool_23 plate_14 well	NO25G01320	GTGGTGGGTCACAACGACGA	Tubulin polyglutamylase ttll6	chr25: 374368	ACGA	A,AC	AO=2,2	DP=164	frameshift_variant
03 Pool	23	03 Pool_23 plate_14 well	NO25G02130	GTACCCCACCAACGATCTGG	Unknown protein	chr25: 682740	G	T	AO=2	DP=110	missense_variant
03 Pool	23	03 Pool_23 plate_16 well	NO25G02130	GTACCCCACCAACGATCTGG	Unknown protein	chr25: 682740	G	T	AO=2	DP=110	missense_variant
03 Pool	23	03 Pool_23 plate_20 well	NO13G01170	GGGACGTCATCTGCACGTCA	U6 snrna-associated sm-like protein lsm4;U6 snRNA-associated Sm-like protein LSm4	chr13: 361252	TGAC	T	AO=1	DP=226	disruptive_inframe_deletion
03 Pool	23	03 Pool_23 plate_22 well	NO25G02130	GTACCCCACCAACGATCTGG	Unknown protein	chr25: 682740	G	T	AO=2	DP=110	missense_variant
03 Pool	23	03 Pool_23 plate_23 well	NO25G02130	GTACCCCACCAACGATCTGG	Unknown protein	chr25: 682740	G	T	AO=2	DP=110	missense_variant
03 Pool	23	03 Pool_23 plate_24 well	NO28G00190	TCTGCACCATCGCAATCACA	ubiquitin 8	chr28: 77847	T	TG	AO=4	DP=206	frameshift_variant
03 Pool	24	03 Pool_24 plate_01 well	NO09G02180	GCTACTGGAAGAGAGATGGG	Unknown protein	chr9: 663423	C	CCAT	AO=3	DP=195	disruptive_inframe_insertion
03 Pool	24	03 Pool_24 plate_02 well	NO02G00890	GCCTCCGCATACTATATGGG	Protein phosphatase 2C, manganese/magnesium aspartate binding site	chr2: 289540	T	AT,A	AO=1,1	DP=119	frameshift_variant
03 Pool	24	03 Pool_24 plate_04 well	NO15G00820	AGAGGGCCAGCACATCATGG	Carbohydrate-binding family 9-like protein	chr15: 256765	CA	CTC,C,CAG,CT	AO=4,1,1,2	DP=197	frameshift_variant
03 Pool	24	03 Pool_24 plate_05 well	NO18G02050	GTACCCAACCTGACGTGCCA	Unknown protein	chr18: 640405	G	GC	AO=1	DP=211	frameshift_variant
03 Pool	24	03 Pool_24 plate_07 well	NO10G01170	TGGATGGGAAACAAGCCCGG	Diacylglycerol cholinephosphotransferase	chr10: 349134	GGC	GC,TGC,GTC,GGT	AO=9,1,1,1	DP=257	frameshift_variant
03 Pool	24	03 Pool_24 plate_09 well	NO14G01220	TGTGTGAGTAGTGTGACGAG	Unknown protein	chr14: 396664	TGTGACGAGTGGTAGCA	T,TGTGACGTGGTAGCA,TGTGACCGAGTGGTAGCA	AO=1,1,1	DP=148	frameshift_variant
03 Pool	24	03 Pool_24 plate_09 well	NO11G01480	AGGCGTGGATGTAGGCACAG	Unknown protein;Unknown protein	chr11: 499895	CA	C,CAA,CAC	AO=1,2,1	DP=130	frameshift_variant
03 Pool	24	03 Pool_24 plate_11 well	NO13G01980	CAAGATCGCCGCTTGCAGTG	Unknown protein	chr13: 569589	C	CT,CTT	AO=5,2	DP=202	frameshift_variant
03 Pool	24	03 Pool_24 plate_12 well	NO12G03080	ATCCTGACACGTATACAGCG	Protein prenyltransferase alpha subunit repeat containing 1;Protein prenyltransferase alpha subunit repeat containing 1	chr12: 848783	CTG	C,CTTG	AO=1,16	DP=233	frameshift_variant
03 Pool	24	03 Pool_24 plate_13 well	NO12G03510	CGTTGAAGAACATGGAGGAG	Unknown protein	chr12: 961878	CCT	CT,C	AO=2,2	DP=97	frameshift_variant
03 Pool	24	03 Pool_24 plate_14 well	NO11G01480	AGGCGTGGATGTAGGCACAG	Unknown protein;Unknown protein	chr11: 499895	CA	C,CAA,CAC	AO=1,2,1	DP=130	frameshift_variant
03 Pool	24	03 Pool_24 plate_21 well	NO24G02390	ACACCCATAATTAACCACCA	Bifunctional apoptosis regulator	chr24: 657608	A	AT	AO=1	DP=180	frameshift_variant
03 Pool	24	03 Pool_24 plate_22 well	NO18G02010	GTCAACGAGCTGGGTCAGGG	Acyl-coenzyme A oxidase	chr18: 622289	CC	T,CCA,CCG	AO=2,1,2	DP=198	frameshift_variant&missense_variant
03 Pool	24	03 Pool_24 plate_24 well	NO22G01400	ATGATGCAATTCAGTCCCGG	Hypersensitive-induced response protein;Hypersensitive-induced response protein;Hypersensitive-induced response protein	chr22: 416389	TC	T	AO=1	DP=177	frameshift_variant
04 Pool	01	04 Pool_01 plate_02 well	NO20G00730	AACACCCTTGCCTTCCAACG	Unknown protein;Unknown protein	chr20: 246874	A	AT	AO=4	DP=208	frameshift_variant
04 Pool	01	04 Pool_01 plate_05 well	NO05G03590	ATGATGGTCGCACGCGCACG	Unknown protein	chr5: 947834	TGCGC	T,TGTGC	AO=3,1	DP=176	frameshift_variant
04 Pool	01	04 Pool_01 plate_07 well	NO08G03390	CTACTCCCACTCCCTCCCAA	Peripheral membrane protein	chr8: 938026	TG	T	AO=3	DP=101	frameshift_variant
04 Pool	01	04 Pool_01 plate_08 well	NO02G04720	CTGCCGCGAAGAACTGATCG	Aspartyl/asparaginyl beta-hydroxylase	chr2: 1280225	G	GA	AO=7	DP=196	frameshift_variant
04 Pool	01	04 Pool_01 plate_09 well	NO10G01910	ACTCACACATACATGCACAG	Eukaryotic translation initiation factor 3 subunit M	chr10: 531027	GCA	G	AO=2	DP=209	frameshift_variant
04 Pool	01	04 Pool_01 plate_11 well	NO08G03600	GGTTGTACTATAGAGTTGGG	Unknown protein	chr8: 1013584	CA	C	AO=1	DP=176	frameshift_variant
04 Pool	01	04 Pool_01 plate_11 well	NO09G03570	GTATGCGTAGATGCCATGTG	ATPase ASNA1 homolog	chr9: 1026299	C	T	AO=2	DP=188	missense_variant
04 Pool	01	04 Pool_01 plate_13 well	NO17G02410	TGTTCACCAATATTGCCAAG	Sugar transporter	chr17: 707438	TGG	T	AO=1	DP=150	frameshift_variant
04 Pool	01	04 Pool_01 plate_16 well	NO04G01270	AAGCTCAAGAAGACGCACCG	Serine threonine protein kinase	chr4: 398135	G	GA	AO=6	DP=167	frameshift_variant
04 Pool	01	04 Pool_01 plate_18 well	NO14G03230	GCAACGAAGAAAGACCGGGA	Protein of unknown function (DUF1997);Unknown protein	chr14: 968084	CGGGAAGGA	GGAAGGA,CGGAAGGA,CCGGAAGGA,CGGGAAGGG	AO=1,4,2,2	DP=191	frameshift_variant
04 Pool	01	04 Pool_01 plate_20 well	NO02G04720	CTGCCGCGAAGAACTGATCG	Aspartyl/asparaginyl beta-hydroxylase	chr2: 1280225	G	GA	AO=7	DP=196	frameshift_variant
04 Pool	01	04 Pool_01 plate_21 well	NO10G02930	AGGGCCAGGTGTCATGACCA	Unknown protein	chr10: 814094	T	GT,GGT,A	AO=1,2,3	DP=176	frameshift_variant
04 Pool	01	04 Pool_01 plate_23 well	NO10G01910	ACTCACACATACATGCACAG	Eukaryotic translation initiation factor 3 subunit M	chr10: 531027	GCA	G	AO=2	DP=209	frameshift_variant
04 Pool	02	04 Pool_02 plate_04 well	NO05G00040	AGATCCCTATCCTGACCTGG	Mucin-2	chr5: 12327	A	AG	AO=1	DP=173	frameshift_variant
04 Pool	02	04 Pool_02 plate_04 well	NO06G00600	CGTCTCAAGCATCAACACCA	UPF0587 protein GA18326	chr6: 229404	G	GT,GTT	AO=1,2	DP=210	frameshift_variant
04 Pool	02	04 Pool_02 plate_05 well	NO06G00600	CGTCTCAAGCATCAACACCA	UPF0587 protein GA18326	chr6: 229404	G	GT,GTT	AO=1,2	DP=210	frameshift_variant
04 Pool	02	04 Pool_02 plate_06 well	NO01G01100	GACACCATGATTGCCAACGG	UDP-sugar pyrophosphorylase	chr1: 279994	G	GA	AO=2	DP=188	frameshift_variant
04 Pool	02	04 Pool_02 plate_06 well	NO05G04130	ACAGGCCCCAGTCTTCAATG	Sf	chr5: 1060701	T	TG	AO=8	DP=193	frameshift_variant
04 Pool	02	04 Pool_02 plate_07 well	NO25G01130	CAAGGAATATGAGGCCAACG	Dna-damage-inducible protein	chr25: 315243	C	CA	AO=15	DP=185	frameshift_variant
04 Pool	02	04 Pool_02 plate_08 well	NO06G00050	ACTATGTACGATGCCATGGG	Unknown protein	chr6: 22879	A	AC	AO=1	DP=151	frameshift_variant
04 Pool	02	04 Pool_02 plate_08 well	NO05G04130	ACAGGCCCCAGTCTTCAATG	Sf	chr5: 1060701	T	TG	AO=8	DP=193	frameshift_variant
04 Pool	02	04 Pool_02 plate_09 well	NO04G03150	CTGGTGGAGAGCAAGTCGTG	Protein phosphatase 1b2 53 kDa isoform	chr4: 863263	G	A	AO=2	DP=102	missense_variant
04 Pool	02	04 Pool_02 plate_09 well	NO20G01780	CTGCTCCACATAGGCCAGAG	Metal dependent phosphohydrolase	chr20: 538430	C	T	AO=3	DP=236	missense_variant
04 Pool	02	04 Pool_02 plate_10 well	NO06G01010	TAGCTCGATGACGTACTCCA	Methyltransferase type 11	chr6: 328199	G	GT	AO=2	DP=187	frameshift_variant
04 Pool	02	04 Pool_02 plate_12 well	NO05G04130	ACAGGCCCCAGTCTTCAATG	Sf	chr5: 1060701	T	TG	AO=8	DP=193	frameshift_variant
04 Pool	02	04 Pool_02 plate_14 well	NO09G00150	GTAGGGGACGATAAAATCCG	Abc transporter g family member 7	chr9: 83762	ATTT	A	AO=7	DP=188	disruptive_inframe_deletion
04 Pool	02	04 Pool_02 plate_15 well	NO20G01780	CTGCTCCACATAGGCCAGAG	Metal dependent phosphohydrolase	chr20: 538430	C	T	AO=3	DP=236	missense_variant
04 Pool	02	04 Pool_02 plate_16 well	NO16G00060	AGAATGGGGCAAGATCGTCG	glycerol-3-phosphatase 1;glycerol-3-phosphatase 1	chr16: 23723	A	AC	AO=13	DP=183	frameshift_variant
04 Pool	02	04 Pool_02 plate_18 well	NO05G02600	CTCGACGAGAGAGAACCCTG	RNA binding protein;RNA binding protein;RNA binding protein	chr5: 689436	CAG	CA,AG	AO=3,2	DP=165	frameshift_variant
04 Pool	02	04 Pool_02 plate_18 well	NO05G04130	ACAGGCCCCAGTCTTCAATG	Sf	chr5: 1060701	T	TG	AO=8	DP=193	frameshift_variant
04 Pool	02	04 Pool_02 plate_20 well	NO23G00140	ACACTCTCAACAGCAGCAGG	Unknown protein	chr23: 72051	GCAGC	G	AO=8	DP=220	frameshift_variant
04 Pool	02	04 Pool_02 plate_21 well	NO13G01170	GGGACGTCATCTGCACGTCA	U6 snrna-associated sm-like protein lsm4;U6 snRNA-associated Sm-like protein LSm4	chr13: 361255	C	ATGC,A	AO=1,2	DP=201	conservative_inframe_insertion
04 Pool	02	04 Pool_02 plate_21 well	NO20G01780	CTGCTCCACATAGGCCAGAG	Metal dependent phosphohydrolase	chr20: 538430	C	T	AO=3	DP=236	missense_variant
04 Pool	02	04 Pool_02 plate_22 well	NO16G00060	AGAATGGGGCAAGATCGTCG	glycerol-3-phosphatase 1;glycerol-3-phosphatase 1	chr16: 23723	A	AC	AO=13	DP=183	frameshift_variant
04 Pool	03	04 Pool_03 plate_01 well	NO04G02260	GTTCCAGATGCTCATCGATA	Sulfotransferase	chr4: 645126	GA	G	AO=11	DP=173	frameshift_variant
04 Pool	03	04 Pool_03 plate_01 well	NO03G03670	GAGGCGAATGACATGCCACG	Na(+)/H(+) antiporter NhaA	chr3: 1090315	ACATGCCACG	ACACG,ACATGCACG,ACATGACG,ACATGCCG,ACATGCC,ACATGCCCACG,ACATGCCACACG,ACATGCCAACG,ACATGCCGACG,ACATGCCTACG,CCATGCCACG	AO=1,18,1,1,1,3,2,2,3,1,1	DP=219	frameshift_variant
04 Pool	03	04 Pool_03 plate_01 well	NO10G01730	TGGACAGAGGCCGAGCTTCG	Papain family cysteine protease containing protein;Papain family cysteine protease containing protein	chr10: 482907	CT	T,CTC	AO=1,1	DP=151	frameshift_variant
04 Pool	03	04 Pool_03 plate_02 well	NO03G03670	GAGGCGAATGACATGCCACG	Na(+)/H(+) antiporter NhaA	chr3: 1090315	ACATGCCACG	ACACG,ACATGCACG,ACATGACG,ACATGCCG,ACATGCC,ACATGCCCACG,ACATGCCACACG,ACATGCCAACG,ACATGCCGACG,ACATGCCTACG,CCATGCCACG	AO=1,18,1,1,1,3,2,2,3,1,1	DP=219	frameshift_variant
04 Pool	03	04 Pool_03 plate_03 well	NO03G03670	GAGGCGAATGACATGCCACG	Na(+)/H(+) antiporter NhaA	chr3: 1090315	ACATGCCACG	ACACG,ACATGCACG,ACATGACG,ACATGCCG,ACATGCC,ACATGCCCACG,ACATGCCACACG,ACATGCCAACG,ACATGCCGACG,ACATGCCTACG,CCATGCCACG	AO=1,18,1,1,1,3,2,2,3,1,1	DP=219	frameshift_variant
04 Pool	03	04 Pool_03 plate_03 well	NO21G00980	ACCAACTACAGGGTAGACGA	Gtp-binding protein 1	chr21: 315108	GA	G	AO=5	DP=164	frameshift_variant
04 Pool	03	04 Pool_03 plate_04 well	NO03G03670	GAGGCGAATGACATGCCACG	Na(+)/H(+) antiporter NhaA	chr3: 1090315	ACATGCCACG	ACACG,ACATGCACG,ACATGACG,ACATGCCG,ACATGCC,ACATGCCCACG,ACATGCCACACG,ACATGCCAACG,ACATGCCGACG,ACATGCCTACG,CCATGCCACG	AO=1,18,1,1,1,3,2,2,3,1,1	DP=219	frameshift_variant
04 Pool	03	04 Pool_03 plate_05 well	NO09G02660	GGCGCACAATGGCTGCCCAG	Ubiquinol cytochrome c reductase subunit qcr9	chr9: 796319	TGCGGCGCACAATGGCTGCCCA	T,TGCGGCGCACAATGACTGCCCA	AO=1,1	DP=221	missense_variant
04 Pool	03	04 Pool_03 plate_05 well	NO03G03670	GAGGCGAATGACATGCCACG	Na(+)/H(+) antiporter NhaA	chr3: 1090315	ACATGCCACG	ACACG,ACATGCACG,ACATGACG,ACATGCCG,ACATGCC,ACATGCCCACG,ACATGCCACACG,ACATGCCAACG,ACATGCCGACG,ACATGCCTACG,CCATGCCACG	AO=1,18,1,1,1,3,2,2,3,1,1	DP=219	frameshift_variant
04 Pool	03	04 Pool_03 plate_06 well	NO06G02870	ACAAGCTCAAGTTTCAAACG	Prolyl endopeptidase	chr6: 822323	CA	C,CAA	AO=10,6	DP=192	frameshift_variant
04 Pool	03	04 Pool_03 plate_06 well	NO03G03670	GAGGCGAATGACATGCCACG	Na(+)/H(+) antiporter NhaA	chr3: 1090315	ACATGCCACG	ACACG,ACATGCACG,ACATGACG,ACATGCCG,ACATGCC,ACATGCCCACG,ACATGCCACACG,ACATGCCAACG,ACATGCCGACG,ACATGCCTACG,CCATGCCACG	AO=1,18,1,1,1,3,2,2,3,1,1	DP=219	frameshift_variant
04 Pool	03	04 Pool_03 plate_07 well	NO03G03670	GAGGCGAATGACATGCCACG	Na(+)/H(+) antiporter NhaA	chr3: 1090315	ACATGCCACG	ACACG,ACATGCACG,ACATGACG,ACATGCCG,ACATGCC,ACATGCCCACG,ACATGCCACACG,ACATGCCAACG,ACATGCCGACG,ACATGCCTACG,CCATGCCACG	AO=1,18,1,1,1,3,2,2,3,1,1	DP=219	frameshift_variant
04 Pool	03	04 Pool_03 plate_07 well	NO29G00920	AAGACTCCTTCACACTCAGG	Unknown protein	chr29: 321907	TG	T,TTG	AO=1,1	DP=220	frameshift_variant&stop_gained
04 Pool	03	04 Pool_03 plate_08 well	NO03G03670	GAGGCGAATGACATGCCACG	Na(+)/H(+) antiporter NhaA	chr3: 1090315	ACATGCCACG	ACACG,ACATGCACG,ACATGACG,ACATGCCG,ACATGCC,ACATGCCCACG,ACATGCCACACG,ACATGCCAACG,ACATGCCGACG,ACATGCCTACG,CCATGCCACG	AO=1,18,1,1,1,3,2,2,3,1,1	DP=219	frameshift_variant
04 Pool	03	04 Pool_03 plate_09 well	NO03G03670	GAGGCGAATGACATGCCACG	Na(+)/H(+) antiporter NhaA	chr3: 1090315	ACATGCCACG	ACACG,ACATGCACG,ACATGACG,ACATGCCG,ACATGCC,ACATGCCCACG,ACATGCCACACG,ACATGCCAACG,ACATGCCGACG,ACATGCCTACG,CCATGCCACG	AO=1,18,1,1,1,3,2,2,3,1,1	DP=219	frameshift_variant
04 Pool	03	04 Pool_03 plate_10 well	NO03G03670	GAGGCGAATGACATGCCACG	Na(+)/H(+) antiporter NhaA	chr3: 1090315	ACATGCCACG	ACACG,ACATGCACG,ACATGACG,ACATGCCG,ACATGCC,ACATGCCCACG,ACATGCCACACG,ACATGCCAACG,ACATGCCGACG,ACATGCCTACG,CCATGCCACG	AO=1,18,1,1,1,3,2,2,3,1,1	DP=219	frameshift_variant
04 Pool	03	04 Pool_03 plate_10 well	NO19G01370	TTACACGCTTGACGCCTACG	Electron transfer flavoprotein subunit beta	chr19: 424433	T	TA	AO=1	DP=148	frameshift_variant
04 Pool	03	04 Pool_03 plate_11 well	NO03G03670	GAGGCGAATGACATGCCACG	Na(+)/H(+) antiporter NhaA	chr3: 1090315	ACATGCCACG	ACACG,ACATGCACG,ACATGACG,ACATGCCG,ACATGCC,ACATGCCCACG,ACATGCCACACG,ACATGCCAACG,ACATGCCGACG,ACATGCCTACG,CCATGCCACG	AO=1,18,1,1,1,3,2,2,3,1,1	DP=219	frameshift_variant
04 Pool	03	04 Pool_03 plate_11 well	NO29G01530	ATGTACAAGTAGGGAAACAG	Unknown protein	chr29: 482707	GGGAAACAG	TGGGAATCAG,GGGAACAG,GGGAAA	AO=3,2,2	DP=215	frameshift_variant&stop_gained
04 Pool	03	04 Pool_03 plate_12 well	NO03G03670	GAGGCGAATGACATGCCACG	Na(+)/H(+) antiporter NhaA	chr3: 1090315	ACATGCCACG	ACACG,ACATGCACG,ACATGACG,ACATGCCG,ACATGCC,ACATGCCCACG,ACATGCCACACG,ACATGCCAACG,ACATGCCGACG,ACATGCCTACG,CCATGCCACG	AO=1,18,1,1,1,3,2,2,3,1,1	DP=219	frameshift_variant
04 Pool	03	04 Pool_03 plate_12 well	NO10G01730	TGGACAGAGGCCGAGCTTCG	Papain family cysteine protease containing protein;Papain family cysteine protease containing protein	chr10: 482907	CT	T,CTC	AO=1,1	DP=151	frameshift_variant
04 Pool	03	04 Pool_03 plate_13 well	NO03G03670	GAGGCGAATGACATGCCACG	Na(+)/H(+) antiporter NhaA	chr3: 1090315	ACATGCCACG	ACACG,ACATGCACG,ACATGACG,ACATGCCG,ACATGCC,ACATGCCCACG,ACATGCCACACG,ACATGCCAACG,ACATGCCGACG,ACATGCCTACG,CCATGCCACG	AO=1,18,1,1,1,3,2,2,3,1,1	DP=219	frameshift_variant
04 Pool	03	04 Pool_03 plate_14 well	NO14G01360	CATCTGCAGTGTTTGACATG	NADH dehydrogenase [ubiquinone] 1 alpha subcomplex subunit 6	chr14: 438480	CATGG	C,CCATGG	AO=1,1	DP=183	frameshift_variant
04 Pool	03	04 Pool_03 plate_14 well	NO03G03670	GAGGCGAATGACATGCCACG	Na(+)/H(+) antiporter NhaA	chr3: 1090315	ACATGCCACG	ACACG,ACATGCACG,ACATGACG,ACATGCCG,ACATGCC,ACATGCCCACG,ACATGCCACACG,ACATGCCAACG,ACATGCCGACG,ACATGCCTACG,CCATGCCACG	AO=1,18,1,1,1,3,2,2,3,1,1	DP=219	frameshift_variant
04 Pool	03	04 Pool_03 plate_15 well	NO03G03670	GAGGCGAATGACATGCCACG	Na(+)/H(+) antiporter NhaA	chr3: 1090315	ACATGCCACG	ACACG,ACATGCACG,ACATGACG,ACATGCCG,ACATGCC,ACATGCCCACG,ACATGCCACACG,ACATGCCAACG,ACATGCCGACG,ACATGCCTACG,CCATGCCACG	AO=1,18,1,1,1,3,2,2,3,1,1	DP=219	frameshift_variant
04 Pool	03	04 Pool_03 plate_16 well	NO03G03670	GAGGCGAATGACATGCCACG	Na(+)/H(+) antiporter NhaA	chr3: 1090315	ACATGCCACG	ACACG,ACATGCACG,ACATGACG,ACATGCCG,ACATGCC,ACATGCCCACG,ACATGCCACACG,ACATGCCAACG,ACATGCCGACG,ACATGCCTACG,CCATGCCACG	AO=1,18,1,1,1,3,2,2,3,1,1	DP=219	frameshift_variant
04 Pool	03	04 Pool_03 plate_16 well	NO02G03120	GTTCATCGTCTGGAGCACAG	Atp-dependent metalloprotease	chr2: 839772	AGCA	A,AGCG	AO=4,1	DP=197	missense_variant
04 Pool	03	04 Pool_03 plate_17 well	NO03G03670	GAGGCGAATGACATGCCACG	Na(+)/H(+) antiporter NhaA	chr3: 1090315	ACATGCCACG	ACACG,ACATGCACG,ACATGACG,ACATGCCG,ACATGCC,ACATGCCCACG,ACATGCCACACG,ACATGCCAACG,ACATGCCGACG,ACATGCCTACG,CCATGCCACG	AO=1,18,1,1,1,3,2,2,3,1,1	DP=219	frameshift_variant
04 Pool	03	04 Pool_03 plate_17 well	NO02G03120	GTTCATCGTCTGGAGCACAG	Atp-dependent metalloprotease	chr2: 839772	AGCA	A,AGCG	AO=4,1	DP=197	missense_variant
04 Pool	03	04 Pool_03 plate_18 well	NO03G03670	GAGGCGAATGACATGCCACG	Na(+)/H(+) antiporter NhaA	chr3: 1090315	ACATGCCACG	ACACG,ACATGCACG,ACATGACG,ACATGCCG,ACATGCC,ACATGCCCACG,ACATGCCACACG,ACATGCCAACG,ACATGCCGACG,ACATGCCTACG,CCATGCCACG	AO=1,18,1,1,1,3,2,2,3,1,1	DP=219	frameshift_variant
04 Pool	03	04 Pool_03 plate_18 well	NO05G01680	GGATCTCAATCCCATGAAGG	methionine aminopeptidase 2B	chr5: 459806	T	C	AO=2	DP=242	missense_variant
04 Pool	03	04 Pool_03 plate_19 well	NO03G03670	GAGGCGAATGACATGCCACG	Na(+)/H(+) antiporter NhaA	chr3: 1090315	ACATGCCACG	ACACG,ACATGCACG,ACATGACG,ACATGCCG,ACATGCC,ACATGCCCACG,ACATGCCACACG,ACATGCCAACG,ACATGCCGACG,ACATGCCTACG,CCATGCCACG	AO=1,18,1,1,1,3,2,2,3,1,1	DP=219	frameshift_variant
04 Pool	03	04 Pool_03 plate_20 well	NO03G03670	GAGGCGAATGACATGCCACG	Na(+)/H(+) antiporter NhaA	chr3: 1090315	ACATGCCACG	ACACG,ACATGCACG,ACATGACG,ACATGCCG,ACATGCC,ACATGCCCACG,ACATGCCACACG,ACATGCCAACG,ACATGCCGACG,ACATGCCTACG,CCATGCCACG	AO=1,18,1,1,1,3,2,2,3,1,1	DP=219	frameshift_variant
04 Pool	03	04 Pool_03 plate_21 well	NO03G03670	GAGGCGAATGACATGCCACG	Na(+)/H(+) antiporter NhaA	chr3: 1090315	ACATGCCACG	ACACG,ACATGCACG,ACATGACG,ACATGCCG,ACATGCC,ACATGCCCACG,ACATGCCACACG,ACATGCCAACG,ACATGCCGACG,ACATGCCTACG,CCATGCCACG	AO=1,18,1,1,1,3,2,2,3,1,1	DP=219	frameshift_variant
04 Pool	03	04 Pool_03 plate_22 well	NO06G03010	ACGCACGCCCCAAATCAAAG	Integral membrane protein TerC	chr6: 858982	CAAATCA	C	AO=10	DP=184	conservative_inframe_deletion
04 Pool	03	04 Pool_03 plate_23 well	NO03G03670	GAGGCGAATGACATGCCACG	Na(+)/H(+) antiporter NhaA	chr3: 1090315	ACATGCCACG	ACACG,ACATGCACG,ACATGACG,ACATGCCG,ACATGCC,ACATGCCCACG,ACATGCCACACG,ACATGCCAACG,ACATGCCGACG,ACATGCCTACG,CCATGCCACG	AO=1,18,1,1,1,3,2,2,3,1,1	DP=219	frameshift_variant
04 Pool	03	04 Pool_03 plate_24 well	NO03G03580	AGTACGACCATCTAGAAGGG	Dnl-type zinc finger	chr3: 1065856	TAGA	T	AO=5	DP=204	conservative_inframe_deletion
04 Pool	03	04 Pool_03 plate_15 well	NO16G00800	GGCCAACAAAGACTTGTCGG	2-oxoglutarate (2OG) and Fe(II)-dependent oxygenase superfamily protein	chr16: 264233	GT	G,GA	AO=1,2	DP=189	frameshift_variant
04 Pool	03	04 Pool_03 plate_16 well	NO04G02850	CAACGCCGTCGATCACCCGG	Unknown protein	chr4: 751254	CG	C	AO=1	DP=182	frameshift_variant
04 Pool	04	04 Pool_04 plate_01 well	NO14G01690	TGACCCGCAAGCTTCACCAG	Calcium calmodulin-dependent protein kinase id	chr14: 522873	AC	A	AO=9	DP=168	frameshift_variant
04 Pool	04	04 Pool_04 plate_02 well	NO05G03340	AGGTTGAACGTACAGAGCCG	Zinc finger, RING-type	chr5: 877621	GGC	G	AO=6	DP=161	frameshift_variant
04 Pool	04	04 Pool_04 plate_03 well	NO14G01840	GGCGCGAAGAATCGGCACAG	Tbc domain-containing protein kinase-like protein	chr14: 567994	CTG	C	AO=2	DP=145	frameshift_variant
04 Pool	04	04 Pool_04 plate_05 well	NO07G02980	GAGCGTACAAATCAGCCCTG	Unknown protein	chr7: 836164	GC	G	AO=6	DP=248	frameshift_variant
04 Pool	04	04 Pool_04 plate_06 well	NO15G01600	TTACGTCCGACCCTCCACCT	Phd finger-like domain-containing protein 5a;Phd finger-like domain-containing protein 5a	chr15: 448244	C	G	AO=4	DP=198	missense_variant
04 Pool	04	04 Pool_04 plate_07 well	NO26G00230	CGGAGGCATGAACCTCAGTG	Unknown protein	chr26: 79498	C	CT	AO=1	DP=67	frameshift_variant
04 Pool	04	04 Pool_04 plate_08 well	NO09G03170	GAAATACATGTGAGCGACGA	Malate dehydrogenase	chr9: 923505	G	GT	AO=5	DP=174	frameshift_variant
04 Pool	04	04 Pool_04 plate_09 well	NO21G00270	TGTCCCCGCATACTGTCACA	Serine/threonine-protein phosphatase	chr21: 92666	T	TC	AO=9	DP=212	frameshift_variant
04 Pool	04	04 Pool_04 plate_16 well	NO08G03070	CAAATGCAGCTTGCTCACCG	Kinesin-like protein	chr8: 853293	T	TCA	AO=2	DP=139	frameshift_variant
04 Pool	04	04 Pool_04 plate_19 well	NO19G02010	CAAGGGCAAGAAACGACGGT	Hybrid cluster protein;Hybrid cluster protein	chr19: 590480	A	C	AO=3	DP=83	missense_variant
04 Pool	04	04 Pool_04 plate_20 well	NO04G00900	ACAATAACAACCGAGGACAA	Pentatricopeptide repeat-containing protein	chr4: 297377	G	GAA	AO=6	DP=178	frameshift_variant
04 Pool	04	04 Pool_04 plate_21 well	NO06G02470	TCGCAGGAATTCACTCACTG	Unknown protein	chr6: 699092	AG	A	AO=5	DP=204	frameshift_variant
04 Pool	04	04 Pool_04 plate_22 well	NO24G00320	CATGGATGAGAAAGGCTTTG	Unknown protein;Unknown protein	chr24: 112734	GGC	G	AO=1	DP=94	frameshift_variant
04 Pool	04	04 Pool_04 plate_24 well	NO08G00330	CGAGGCCTCTCCGCTACCTG	Unknown protein	chr8: 132471	GCTAC	G,ACTAC	AO=6,1	DP=175	frameshift_variant
04 Pool	05	04 Pool_05 plate_01 well	NO19G00740	CCGCCAAGTAGAGATAAAGA	Unknown protein	chr19: 261374	AA	A,AAG	AO=4,1	DP=164	frameshift_variant
04 Pool	05	04 Pool_05 plate_02 well	NO19G00250	GGATGGTAAAGGCAAAAACA	Unknown protein	chr19: 101631	GTTT	GTT,GT,G,GTTTT	AO=1,1,1,1	DP=163	frameshift_variant
04 Pool	05	04 Pool_05 plate_02 well	NO29G00220	GTTCGAACTTGTCAAAAGGG	Unknown protein	chr29: 86833	G	A	AO=2	DP=226	synonymous_variant
04 Pool	05	04 Pool_05 plate_03 well	NO26G01570	CGAGCTTGGATTCACCAACG	PGR5-LIKE A;PGR5-LIKE A	chr26: 513862	AC	C,AG	AO=4,1	DP=57	frameshift_variant
04 Pool	05	04 Pool_05 plate_05 well	NO19G00740	CCGCCAAGTAGAGATAAAGA	Unknown protein	chr19: 261374	AA	A,AAG	AO=4,1	DP=164	frameshift_variant
04 Pool	05	04 Pool_05 plate_06 well	NO19G00250	GGATGGTAAAGGCAAAAACA	Unknown protein	chr19: 101631	GTTT	GTT,GT,G,GTTTT	AO=1,1,1,1	DP=163	frameshift_variant
04 Pool	05	04 Pool_05 plate_07 well	NO02G01830	CCCAGACCAAGAATGTAACG	Palmitoyltransferase;Palmitoyltransferase;Palmitoyltransferase	chr2: 534432	TA	T,TAA,TAAA	AO=1,4,1	DP=211	frameshift_variant
04 Pool	05	04 Pool_05 plate_08 well	NO14G01010	ACCCGGCTTCTTCTTGACAT	Unknown protein	chr14: 338538	GATAGGACCCGGCTTCTTCTTGAC	G,GATAGGACCCGGCTTCTTCTTGAAC,GGTAGGACCCGGCTTCTTCTTGAC	AO=3,2,1	DP=137	frameshift_variant
04 Pool	05	04 Pool_05 plate_08 well	NO03G03670	GAGGCGAATGACATGCCACG	Na(+)/H(+) antiporter NhaA	chr3: 1090323	C	T	AO=2	DP=238	missense_variant
04 Pool	05	04 Pool_05 plate_09 well	NO12G03720	GGAGCTCAAGTAGAGGACGA	Unknown protein	chr12: 1033319	GT	G,GCT	AO=6,2	DP=197	frameshift_variant
04 Pool	05	04 Pool_05 plate_10 well	NO16G00120	GGTCCGAATCACACAGACCG	Poliketide cyclase/dehydrase;Poliketide cyclase/dehydrase	chr16: 44107	G	GAA	AO=1	DP=156	frameshift_variant
04 Pool	05	04 Pool_05 plate_11 well	NO19G00370	ATGTCCTACAACTCGCGTCG	Unknown protein	chr19: 148132	GT	G,GCT,GTT,GTTT	AO=2,1,4,1	DP=166	frameshift_variant
04 Pool	05	04 Pool_05 plate_13 well	NO04G02030	CTTGGCATTAGGGAGCACAG	Peptidase m50	chr4: 591025	CTG	C	AO=2	DP=145	frameshift_variant
04 Pool	05	04 Pool_05 plate_14 well	NO02G01830	CCCAGACCAAGAATGTAACG	Palmitoyltransferase;Palmitoyltransferase;Palmitoyltransferase	chr2: 534432	TA	T,TAA,TAAA	AO=1,4,1	DP=211	frameshift_variant
04 Pool	05	04 Pool_05 plate_15 well	NO02G01970	GCTGTGCGCTCCTTAGAAGG	Unknown protein	chr2: 564160	T	TA	AO=2	DP=198	frameshift_variant
04 Pool	05	04 Pool_05 plate_16 well	NO19G00370	ATGTCCTACAACTCGCGTCG	Unknown protein	chr19: 148132	GT	G,GCT,GTT,GTTT	AO=2,1,4,1	DP=166	frameshift_variant
04 Pool	05	04 Pool_05 plate_16 well	NO19G00250	GGATGGTAAAGGCAAAAACA	Unknown protein	chr19: 101631	GTTT	GTT,GT,G,GTTTT	AO=1,1,1,1	DP=163	frameshift_variant
04 Pool	05	04 Pool_05 plate_17 well	NO21G00600	GCGTCGCTCAAACTCTTGCG	SWI/SNF chromatin-remodeling complex subunit snf5	chr21: 214568	C	CA	AO=2	DP=205	frameshift_variant
04 Pool	05	04 Pool_05 plate_18 well	NO06G02670	CAACCGCATGTCCAGCTCAG	Cax-interacting protein 4	chr6: 757655	CCAGCT	C,CCAGCTT,CCAGCTTT	AO=1,1,2	DP=193	frameshift_variant
04 Pool	05	04 Pool_05 plate_19 well	NO21G02560	ACCCTGCACTCTCGATCATG	Mmpl domain protein	chr21: 783300	AT	A	AO=3	DP=51	frameshift_variant
04 Pool	05	04 Pool_05 plate_19 well	NO02G01830	CCCAGACCAAGAATGTAACG	Palmitoyltransferase;Palmitoyltransferase;Palmitoyltransferase	chr2: 534432	TA	T,TAA,TAAA	AO=1,4,1	DP=211	frameshift_variant
04 Pool	05	04 Pool_05 plate_20 well	NO19G01790	GTTTCTGCAACGTGGAGTCA	Tyrosine transporter	chr19: 536305	AG	A	AO=6	DP=172	frameshift_variant
04 Pool	05	04 Pool_05 plate_20 well	NO03G03670	GAGGCGAATGACATGCCACG	Na(+)/H(+) antiporter NhaA	chr3: 1090323	C	T	AO=2	DP=238	missense_variant
04 Pool	05	04 Pool_05 plate_21 well	NO14G01010	ACCCGGCTTCTTCTTGACAT	Unknown protein	chr14: 338538	GATAGGACCCGGCTTCTTCTTGAC	G,GATAGGACCCGGCTTCTTCTTGAAC,GGTAGGACCCGGCTTCTTCTTGAC	AO=3,2,1	DP=137	frameshift_variant
04 Pool	05	04 Pool_05 plate_23 well	NO12G03110	CCAGTAGAACGAGAGCAAAG	Viral protein TPX	chr12: 855740	AGC	A,AG,AGCAC,AGCA,AGCAT	AO=1,1,1,4,1	DP=193	frameshift_variant
04 Pool	06	04 Pool_06 plate_03 well	NO23G01000	ACCGTGTTGGGTACCGACGG	Unknown protein	chr23: 377431	CCGA	C	AO=1	DP=182	disruptive_inframe_deletion
04 Pool	06	04 Pool_06 plate_04 well	NO21G02400	AATTGACGATGACAACATGG	Unknown protein	chr21: 726734	C	CA	AO=8	DP=170	frameshift_variant
04 Pool	06	04 Pool_06 plate_05 well	NO16G00730	GTCCACCACAAAGAGCATCC	Nudix hydrolase 1	chr16: 245233	C	CA	AO=9	DP=212	frameshift_variant
04 Pool	06	04 Pool_06 plate_08 well	NO15G03330	AAAGCGAACCGATCTCACGG	Myc-induced nuclear antigen	chr15: 971872	G	GT	AO=19	DP=240	frameshift_variant
04 Pool	06	04 Pool_06 plate_09 well	NO15G03330	AAAGCGAACCGATCTCACGG	Myc-induced nuclear antigen	chr15: 971872	G	GT	AO=19	DP=240	frameshift_variant
04 Pool	06	04 Pool_06 plate_10 well	NO07G04010	ATGGACAAACCATTCGACGG	Unknown protein	chr7: 1117146	C	CG,CGG	AO=1,2	DP=68	frameshift_variant
04 Pool	06	04 Pool_06 plate_10 well	NO29G00380	TTCATGTCGTGCGTGTGGCG	Unknown protein	chr29: 157942	GCCCGC	G,ACCCGC	AO=1,1	DP=190	frameshift_variant
04 Pool	06	04 Pool_06 plate_11 well	NO02G02010	CGGATCGCATCAGTATGGAG	Soluble pyridine nucleotide transhydrogenase	chr2: 574520	CCAT	AACCCTA,CAT	AO=1,3	DP=248	frameshift_variant
04 Pool	06	04 Pool_06 plate_12 well	NO08G00460	TCTGACAAATCATCGCGACG	Poly polymerase gamma	chr8: 183364	T	TGA	AO=1	DP=205	frameshift_variant
04 Pool	06	04 Pool_06 plate_12 well	NO01G04120	CGAAGGCGGATATCAACAGG	Signal recognition particle-docking protein FtsY	chr1: 1100603	T	G	AO=2	DP=102	missense_variant
04 Pool	06	04 Pool_06 plate_13 well	NO24G01580	TTGGTCAAGGGCCACCACAG	WD40-repeat-containing domain protein	chr24: 422154	T	G	AO=3	DP=182	synonymous_variant
04 Pool	06	04 Pool_06 plate_14 well	NO07G04010	ATGGACAAACCATTCGACGG	Unknown protein	chr7: 1117146	C	CG,CGG	AO=1,2	DP=68	frameshift_variant
04 Pool	06	04 Pool_06 plate_15 well	NO29G00380	TTCATGTCGTGCGTGTGGCG	Unknown protein	chr29: 157942	GCCCGC	G,ACCCGC	AO=1,1	DP=190	frameshift_variant
04 Pool	06	04 Pool_06 plate_16 well	NO15G00310	CCTTCATTCGGCTCAAGGAG	Unknown protein	chr15: 97571	AG	A,AGG	AO=3,2	DP=226	frameshift_variant
04 Pool	06	04 Pool_06 plate_17 well	NO12G02520	CGGCCGTTCCCAGATGCACT	Unknown protein	chr12: 718375	G	GC	AO=2	DP=205	frameshift_variant
04 Pool	06	04 Pool_06 plate_17 well	NO07G02160	GGTGAGAGTTTGGATCACAT	Endoribonuclease dicer	chr7: 640769	CA	C	AO=1	DP=221	frameshift_variant
04 Pool	06	04 Pool_06 plate_19 well	NO02G02800	CGTATGGCCGCAAACCGTAA	Casein kinase II subunit beta	chr2: 760068	AC	A,AAC,AGC	AO=1,3,1	DP=220	frameshift_variant
04 Pool	06	04 Pool_06 plate_20 well	NO13G02340	GATGTCAACAGCACCCGACG	Fidgetin protein 1	chr13: 649654	GA	G,GGA,GAA	AO=4,1,11	DP=217	frameshift_variant
04 Pool	06	04 Pool_06 plate_22 well	NO02G04860	CAAGGTACACACAACTACGG	transferases, transferring acyl groups other than amino-acyl groups;acyltransferases;transferases, transferring acyl groups other than amino-acyl groups;acyltransferases;transferases, transferring acyl groups other than amino-acyl groups;acyltransferases;Esterase/lipase/thioesterase family protein	chr2: 1314407	GTAGT	G	AO=7	DP=216	frameshift_variant
04 Pool	07	04 Pool_07 plate_02 well	NO17G02470	CAGCTTCAAGAACAGCGGGG	Ribosomal protein L28e	chr17: 732249	CG	C	AO=9	DP=143	frameshift_variant
04 Pool	07	04 Pool_07 plate_03 well	NO04G00760	CTAAGATTAGGAAAGTTCGG	Importin-beta	chr4: 259215	GT	G	AO=2	DP=209	frameshift_variant
04 Pool	07	04 Pool_07 plate_04 well	NO05G01820	CACCCCACTTGGCAAAAACG	Acyltransferase 3	chr5: 499521	CA	C,CAAA	AO=8,1	DP=246	frameshift_variant
04 Pool	07	04 Pool_07 plate_05 well	NO14G00030	TGATCCGGCAGGCTTCCACG	Ankyrin repeat domain-containing protein 65;Ankyrin repeat domain-containing protein 65	chr14: 7896	TC	T,GC	AO=6,1	DP=235	frameshift_variant
04 Pool	07	04 Pool_07 plate_07 well	NO17G02470	CAGCTTCAAGAACAGCGGGG	Ribosomal protein L28e	chr17: 732249	CG	C	AO=9	DP=143	frameshift_variant
04 Pool	07	04 Pool_07 plate_08 well	NO16G00030	ACTTGCTACACAGAAACCAC	Major facilitator superfamily	chr16: 4650	ACACAGAAAC	A,ACACAGAAA,ACGCAGAAAC,ACACGGAAAC	AO=3,2,1,1	DP=226	frameshift_variant
04 Pool	07	04 Pool_07 plate_10 well	NO22G00690	TGGGCGTCCACACCCGACAG	LUC7 related protein	chr22: 233507	G	GT	AO=10	DP=223	frameshift_variant
04 Pool	07	04 Pool_07 plate_13 well	NO02G00520	ACTGCCGAAGAACTTGACGG	Zn(2)-C6 fungal-type DNA-binding domain protein	chr2: 179545	AC	C,AAC,ACC,ATC,TC,AT	AO=1,3,1,2,1,2	DP=193	frameshift_variant&stop_lost
04 Pool	07	04 Pool_07 plate_15 well	NO07G02340	TGCGGCGAGCTGCATCCATG	Transcriptional sir2 family	chr7: 690392	C	CA	AO=2	DP=229	frameshift_variant
04 Pool	07	04 Pool_07 plate_17 well	NO28G00440	AGGAAGGGCGATCTTGTCGA	Queuine tRNA-ribosyltransferase accessory subunit 2	chr28: 165519	TC	T,TTC,TGC	AO=1,9,1	DP=130	frameshift_variant
04 Pool	07	04 Pool_07 plate_18 well	NO15G02300	ACAGCTGTCAAAGTTTTACG	U5 small nuclear ribonucleoprotein helicase	chr15: 643399	A	AAAAAAAAAA,C	AO=1,3	DP=125	missense_variant
04 Pool	07	04 Pool_07 plate_19 well	NO14G03060	GATAGAGGATGTGACCTGAG	O-acyltransferase	chr14: 903959	CC	C,CCTA,CCTT	AO=1,1,3	DP=219	frameshift_variant
04 Pool	07	04 Pool_07 plate_20 well	NO02G00440	TTACCCAGTCTATGGATGAG	Sh2 domain containing protein	chr2: 154143	GGA	G,GGAT,GGATC,GGATT	AO=1,4,1,5	DP=213	frameshift_variant
04 Pool	07	04 Pool_07 plate_21 well	NO28G00030	ACCACCACGTACAGATAACG	E3 ubiquitin-protein ligase NEDD4;E3 ubiquitin-protein ligase NEDD4;E3 ubiquitin-protein ligase NEDD4	chr28: 6498	T	TC	AO=1	DP=131	frameshift_variant
04 Pool	07	04 Pool_07 plate_22 well	NO10G03840	GCATGCAGGAGTGTTCAAGG	Unknown protein;Unknown protein;Unknown protein	chr10: 1119743	CCTCCTTGAACA	C	AO=1	DP=129	frameshift_variant&stop_lost
04 Pool	07	04 Pool_07 plate_23 well	NO13G01590	GAACTACTTTGGCAAGTACG	RNA-binding protein Musashi	chr13: 471200	GTAC	G,ATAC	AO=4,1	DP=207	disruptive_inframe_deletion
04 Pool	07	04 Pool_07 plate_24 well	NO07G03840	ATAGGAAGAGGATTGATTGG	Emopamil binding protein	chr7: 1073938	G	TG,A	AO=4,1	DP=234	frameshift_variant
04 Pool	08	04 Pool_08 plate_06 well	NO20G00370	CACCAGTCTTGGCACCCCAG	Unknown protein	chr20: 126702	ACCAGTCTTGGCACC	A,ACCAGTCTTGGCACCC	AO=7,6	DP=194	frameshift_variant
04 Pool	08	04 Pool_08 plate_07 well	NO02G02630	ATTGCCCCCTTAGTGTGACG	Sorting nexin-16	chr2: 730824	GT	G	AO=4	DP=200	frameshift_variant
04 Pool	08	04 Pool_08 plate_08 well	NO07G04110	TTGGGGCGAGGTGATCAGGG	S-layer domain protein	chr7: 1149024	GGGGCGAGGTGATCA	G,GGGGCGAGGTGATCAC	AO=1,2	DP=182	frameshift_variant
04 Pool	08	04 Pool_08 plate_09 well	NO10G03870	GATACCATTAAAACCGTGGG	Cellulase 2	chr10: 1128885	C	CA	AO=1	DP=140	frameshift_variant
04 Pool	08	04 Pool_08 plate_10 well	NO05G00710	ATCGAGAGGATGTTCCCACG	Unknown protein	chr5: 232064	CGT	C	AO=1	DP=204	frameshift_variant
04 Pool	08	04 Pool_08 plate_13 well	NO13G02620	AGGAACGCCTTAGGAAGCAT	Unknown protein	chr13: 724257	G	GC	AO=5	DP=225	frameshift_variant
04 Pool	08	04 Pool_08 plate_14 well	NO01G00450	CTTCCGAGCCGTCCGCAACG	4-methyl-5(B-hydroxyethyl)-thiazole monophosphate biosynthesis	chr1: 123458	C	CA	AO=1	DP=208	frameshift_variant
04 Pool	08	04 Pool_08 plate_15 well	NO16G01060	CGGTCATGATTGCCATTACG	Unknown protein	chr16: 337400	T	TA	AO=5	DP=205	frameshift_variant
04 Pool	08	04 Pool_08 plate_16 well	NO23G01720	CCTACATGAGTGCTGCATCG	Pab-dependent poly-specific ribonuclease subunit 3	chr23: 630464	A	AG,AT	AO=1,5	DP=159	frameshift_variant
04 Pool	08	04 Pool_08 plate_18 well	NO10G02820	TAGGCCGGTTCCGATCACGG	Protein kinase	chr10: 776743	C	CA	AO=9	DP=219	frameshift_variant
04 Pool	08	04 Pool_08 plate_18 well	NO20G00370	CACCAGTCTTGGCACCCCAG	Unknown protein	chr20: 126702	ACCAGTCTTGGCACC	A,ACCAGTCTTGGCACCC	AO=7,6	DP=194	frameshift_variant
04 Pool	08	04 Pool_08 plate_19 well	NO13G02620	AGGAACGCCTTAGGAAGCAT	Unknown protein	chr13: 724257	G	GC	AO=5	DP=225	frameshift_variant
04 Pool	08	04 Pool_08 plate_20 well	NO16G02230	ACTTGCCCAGCAACTTACGT	Lanc-like protein 2	chr16: 651621	GTA	G	AO=2	DP=218	frameshift_variant
04 Pool	08	04 Pool_08 plate_22 well	NO02G03100	TATAGAGCCCCTGATCCGCG	Nicotinate phosphoribosyltransferase-like protein	chr2: 832880	CGC	GC,CGT	AO=2,1	DP=221	frameshift_variant
04 Pool	08	04 Pool_08 plate_23 well	NO03G00380	TTAGAAGAAAGCGATCCTTG	Unknown protein	chr3: 122448	C	CATCC,G	AO=1,1	DP=128	frameshift_variant
04 Pool	09	04 Pool_09 plate_02 well	NO07G03300	GCTTTCACGAGCAGTACCGG	Unknown protein	chr7: 910578	CCG	CG,ACG,CCC	AO=10,1,1	DP=200	frameshift_variant
04 Pool	09	04 Pool_09 plate_04 well	NO10G00830	GCTACTGGTGGAGAGGACAG	SNF2 domain-containing protein / helicase domain-containing protein	chr10: 272675	GT	T,G	AO=1,1	DP=116	frameshift_variant
04 Pool	09	04 Pool_09 plate_05 well	NO02G03590	GAAGAACGAGGTAAGCCATG	Unknown protein	chr2: 962724	GC	G	AO=10	DP=216	frameshift_variant
04 Pool	09	04 Pool_09 plate_06 well	NO03G04660	CTCCACAAAGTCGATCCAGG	2fe-2s iron-sulfur cluster binding domain protein	chr3: 1333912	TCCA	TCC,TCCCA,CCCA,TCCG	AO=1,1,2,1	DP=218	frameshift_variant
04 Pool	09	04 Pool_09 plate_06 well	NO26G01440	GATGTACCGATTGTTGCTTG	Ppr repeat-containing protein	chr26: 465073	GTTGC	G	AO=1	DP=169	frameshift_variant
04 Pool	09	04 Pool_09 plate_07 well	NO09G03540	ACTAGTGACAGTGAAGACGA	Nicotinamide N-methyltransferase, putative;Nicotinamide N-methyltransferase, putative;Nicotinamide N-methyltransferase, putative;Nicotinamide N-methyltransferase, putative	chr9: 1013042	A	AT	AO=6	DP=203	frameshift_variant
04 Pool	09	04 Pool_09 plate_08 well	NO03G04660	CTCCACAAAGTCGATCCAGG	2fe-2s iron-sulfur cluster binding domain protein	chr3: 1333912	TCCA	TCC,TCCCA,CCCA,TCCG	AO=1,1,2,1	DP=218	frameshift_variant
04 Pool	09	04 Pool_09 plate_09 well	NO10G03930	GGATACGAGGGGAAAGACGT	WD40/YVTN repeat-like-containing domain protein;Unknown protein	chr10: 1159746	A	AT	AO=1	DP=123	frameshift_variant
04 Pool	09	04 Pool_09 plate_12 well	NO01G04120	CGAAGGCGGATATCAACAGG	Signal recognition particle-docking protein FtsY	chr1: 1100603	T	G	AO=2	DP=98	missense_variant
04 Pool	09	04 Pool_09 plate_12 well	NO05G01200	ATGCTGACCTAGAAATGCGG	Tripeptidyl-peptidase 2	chr5: 350646	TGC	T	AO=1	DP=203	frameshift_variant
04 Pool	09	04 Pool_09 plate_15 well	NO17G00550	TCTCATGTCTGTGAACAGGA	Cleavage and polyadenylation specificity factor subunit 1	chr17: 203610	GAAC	G	AO=1	DP=88	disruptive_inframe_deletion
04 Pool	09	04 Pool_09 plate_16 well	NO12G00940	GCAGATGTTTAAAGATCAGG	Unknown protein;Unknown protein	chr12: 302292	TC	T	AO=13	DP=196	frameshift_variant
04 Pool	09	04 Pool_09 plate_17 well	NO01G04490	TCTACGGGCGAGATCTTGTG	Peroxisomal membrane 22 kDa (Mpv17 pmp22) family protein	chr1: 1188385	CAAG	CAG,C,CAAAG	AO=4,3,1	DP=175	frameshift_variant
04 Pool	09	04 Pool_09 plate_18 well	NO13G02980	ACGGTACTGGTAGTTCACCG	Mitochondrial carrier domain-containing protein;Mitochondrial carrier domain-containing protein	chr13: 832400	GGT	G,GGGGT,GGTT	AO=1,1,6	DP=171	frameshift_variant
04 Pool	09	04 Pool_09 plate_19 well	NO12G01440	ACCGAATGGTTCCACTAACG	Dynein light chain 1, axonemal	chr12: 448897	T	A,G	AO=4,2	DP=205	synonymous_variant
04 Pool	09	04 Pool_09 plate_20 well	NO08G00050	GGAGATGGAGACAAACAACA	Unknown protein;Unknown protein	chr8: 22442	GTTTG	TTG,TGTTTG,GTTTC	AO=1,1,1	DP=159	frameshift_variant
04 Pool	09	04 Pool_09 plate_20 well	NO09G03540	ACTAGTGACAGTGAAGACGA	Nicotinamide N-methyltransferase, putative;Nicotinamide N-methyltransferase, putative;Nicotinamide N-methyltransferase, putative;Nicotinamide N-methyltransferase, putative	chr9: 1013042	A	AT	AO=6	DP=203	frameshift_variant
04 Pool	09	04 Pool_09 plate_22 well	NO06G01730	GCAGGGAAAGAAAATGTCTG	Dna replication helicase	chr6: 532771	T	TA	AO=1	DP=147	frameshift_variant
04 Pool	09	04 Pool_09 plate_23 well	NO21G01050	AATCGTGGACATCTCCCAAG	Short-chain dehydrogenase reductase sdr	chr21: 332015	T	TC	AO=7	DP=186	frameshift_variant
04 Pool	10	04 Pool_10 plate_03 well	NO08G04070	AAGACATCCATCTCGACGAA	Golgi apparatus membrane protein TVP15;Golgi apparatus membrane protein TVP15	chr8: 1163788	TC	T	AO=1	DP=208	frameshift_variant
04 Pool	10	04 Pool_10 plate_05 well	NO26G00800	GCCGCCAAACAGGAACATCG	Fyve and coiled-coil domain-containing protein 1	chr26: 273130	CA	T,CAT	AO=1,8	DP=192	frameshift_variant&missense_variant
04 Pool	10	04 Pool_10 plate_06 well	NO08G02170	CGTCTGTCGAAGGATCTCTG	Unknown protein;Unknown protein;Unknown protein	chr8: 641228	ATC	A,ATA	AO=16,1	DP=212	frameshift_variant
04 Pool	10	04 Pool_10 plate_07 well	NO28G00160	AAGCTTTGGCACCCAAACGT	FAD dependent oxidoreductase	chr28: 69051	CG	C	AO=4	DP=83	frameshift_variant
04 Pool	10	04 Pool_10 plate_08 well	NO07G02370	AAAAGAGAATGAGTTCCAGG	Unknown protein	chr7: 696438	A	C	AO=3	DP=125	missense_variant
04 Pool	10	04 Pool_10 plate_08 well	NO07G00250	CGTGGGCATGAACGCCTGGG	Peroxiredoxin q	chr7: 104953	T	TC	AO=9	DP=212	frameshift_variant
04 Pool	10	04 Pool_10 plate_09 well	NO02G05420	CGGTGCGGCTATCTTCCTGA	Fatty acid desaturase domain protein	chr2: 1445338	CC	C,CCT	AO=2,3	DP=231	frameshift_variant
04 Pool	10	04 Pool_10 plate_10 well	NO03G01920	ATTACAACAAGACCTTTACG	Phosphoglycerate mutase	chr3: 590917	T	TA	AO=2	DP=228	frameshift_variant
04 Pool	10	04 Pool_10 plate_12 well	NO07G00250	CGTGGGCATGAACGCCTGGG	Peroxiredoxin q	chr7: 104953	T	TC	AO=9	DP=212	frameshift_variant
04 Pool	10	04 Pool_10 plate_13 well	NO19G01690	GAGGCCTTGATTAATCACCT	Unknown protein	chr19: 510746	G	GA	AO=1	DP=249	frameshift_variant
04 Pool	10	04 Pool_10 plate_15 well	NO29G01610	TCACTACGACAGCAAAACGA	Endonuclease	chr29: 507411	CGTCGTTTTGCT	C,CGTCTTTTTGCT	AO=4,1	DP=157	frameshift_variant
04 Pool	10	04 Pool_10 plate_18 well	NO11G02760	TGGATATACGAATTCAGTAT	Citrate/oxoglutarate carrier protein	chr11: 869140	T	TA	AO=1	DP=157	frameshift_variant
04 Pool	10	04 Pool_10 plate_19 well	NO30G00070	TGCCCGGTCAGCTCTATGAG	Unknown protein	chr30: 30015	CTA	C	AO=5	DP=240	frameshift_variant
04 Pool	10	04 Pool_10 plate_21 well	NO09G00310	CAAACTCTTCCACTCCCCGG	Beta glucosidase	chr9: 156948	TC	T,TCC	AO=7,1	DP=203	frameshift_variant
04 Pool	10	04 Pool_10 plate_22 well	NO09G01140	AGCATTGGAAAAGTTGAACA	Unknown protein	chr9: 369573	ACA	CA,ACT	AO=11,1	DP=235	frameshift_variant
04 Pool	10	04 Pool_10 plate_24 well	NO09G04030	GCGGATCTACCATTACTCGG	Unknown protein	chr9: 1184616	TTAC	T,TTACT	AO=1,9	DP=179	frameshift_variant
04 Pool	11	04 Pool_11 plate_01 well	NO27G01850	CTGCTGAGTTGTAATCAAGT	Unknown protein;Unknown protein;Unknown protein	chr27: 623348	CT	C	AO=6	DP=207	frameshift_variant
04 Pool	11	04 Pool_11 plate_02 well	NO26G00870	CTCAGAGTTTGACAGCACAA	Protein phosphatase 2C, manganese/magnesium aspartate binding site	chr26: 290027	G	GT	AO=1	DP=117	frameshift_variant
04 Pool	11	04 Pool_11 plate_03 well	NO12G02230	AGTGTCGGGTAACCGCATTG	Cell cycle arrest protein BUB3	chr12: 637216	GCATT	ACATTTT,GCA	AO=1,10	DP=236	frameshift_variant&synonymous_variant
04 Pool	11	04 Pool_11 plate_04 well	NO19G00060	ACTCGACAGAGGGTGCGGTG	Unknown protein	chr19: 14792	C	CCA	AO=1	DP=298	frameshift_variant
04 Pool	11	04 Pool_11 plate_06 well	NO02G01700	TGGTACCACCCTTCACACAA	NAD(P)-binding domain protein	chr2: 500347	CA	C	AO=14	DP=260	frameshift_variant
04 Pool	11	04 Pool_11 plate_08 well	NO25G01400	TTGGTGAAAAGGTACACACG	Unknown protein	chr25: 397824	TACAC	TAC,T	AO=5,1	DP=212	frameshift_variant
04 Pool	11	04 Pool_11 plate_09 well	NO01G04570	CAATACCAACATCGGCACCA	Unknown protein	chr1: 1206176	GGCA	G,GGCAA,GGCAAA,GGCAG	AO=2,4,1,2	DP=207	frameshift_variant
04 Pool	11	04 Pool_11 plate_11 well	NO09G03570	GTATGCGTAGATGCCATGTG	ATPase ASNA1 homolog	chr9: 1026296	ATGCCA	A,ATGCCAT,ATGCCATG,ATGTCA	AO=2,5,1,1	DP=217	frameshift_variant
04 Pool	11	04 Pool_11 plate_11 well	NO16G00460	TCTGGAAGGTATGTCGCCAG	Unknown protein	chr16: 166095	G	A	AO=2	DP=201	missense_variant
04 Pool	11	04 Pool_11 plate_12 well	NO09G03570	GTATGCGTAGATGCCATGTG	ATPase ASNA1 homolog	chr9: 1026296	ATGCCA	A,ATGCCAT,ATGCCATG,ATGTCA	AO=2,5,1,1	DP=217	frameshift_variant
04 Pool	11	04 Pool_11 plate_13 well	NO09G03570	GTATGCGTAGATGCCATGTG	ATPase ASNA1 homolog	chr9: 1026296	ATGCCA	A,ATGCCAT,ATGCCATG,ATGTCA	AO=2,5,1,1	DP=217	frameshift_variant
04 Pool	11	04 Pool_11 plate_14 well	NO24G02390	ACACCCATAATTAACCACCA	Bifunctional apoptosis regulator	chr24: 657607	CA	A,CAA,CT	AO=1,2,1	DP=166	frameshift_variant
04 Pool	11	04 Pool_11 plate_15 well	NO14G02590	AGGGCTGATGCAGATCGAAG	Unknown protein	chr14: 774945	GCTGCTTCCCCTTCACCTCTTCGAT	G,GCTGCTTCCCCTTCACCCCTTCGAT	AO=2,1	DP=121	missense_variant
04 Pool	11	04 Pool_11 plate_16 well	NO13G00170	AAACGTGAAGGGCTTTCCAG	Unknown protein	chr13: 74442	CTGG	G,CTAG,CTGT	AO=5,1,1	DP=186	missense_variant
04 Pool	11	04 Pool_11 plate_17 well	NO29G01730	AGGATCGAAATTCTTGAAGG	Protein fucoxanthin chlorophyll a c protein	chr29: 549467	TGA	A,TGAA,TGAG	AO=1,1,1	DP=105	frameshift_variant
04 Pool	11	04 Pool_11 plate_19 well	NO01G03750	TTCCTAATCGAGCAACCCCA	Emp24 gp25l p24 family protein	chr1: 1004709	TG	T	AO=3	DP=192	frameshift_variant
04 Pool	11	04 Pool_11 plate_20 well	NO09G03570	GTATGCGTAGATGCCATGTG	ATPase ASNA1 homolog	chr9: 1026296	ATGCCA	A,ATGCCAT,ATGCCATG,ATGTCA	AO=2,5,1,1	DP=217	frameshift_variant
04 Pool	11	04 Pool_11 plate_22 well	NO09G03110	CATAAACGACTGGAGCAAGG	Ammonium transporter	chr9: 907451	T	TT,TG	AO=6,5	DP=200	frameshift_variant
04 Pool	11	04 Pool_11 plate_22 well	NO29G01730	AGGATCGAAATTCTTGAAGG	Protein fucoxanthin chlorophyll a c protein	chr29: 549467	TGA	A,TGAA,TGAG	AO=1,1,1	DP=105	frameshift_variant
04 Pool	11	04 Pool_11 plate_23 well	NO18G00850	ACTGGCCACAGAGCAGGACG	ATP-dependent Clp protease proteolytic subunit;ATP-dependent Clp protease proteolytic subunit	chr18: 321700	T	TA	AO=3	DP=134	frameshift_variant
04 Pool	11	04 Pool_11 plate_23 well	NO09G03570	GTATGCGTAGATGCCATGTG	ATPase ASNA1 homolog	chr9: 1026296	ATGCCA	A,ATGCCAT,ATGCCATG,ATGTCA	AO=2,5,1,1	DP=217	frameshift_variant
04 Pool	11	04 Pool_11 plate_24 well	NO11G02240	CATTTACGAGTATGGCAGCG	Cupin, RmlC-type	chr11: 727842	C	A	AO=2	DP=203	missense_variant
04 Pool	12	04 Pool_12 plate_01 well	NO18G00160	GAGATTGGAGAGCAATCCTG	Unknown protein	chr18: 67131	GGATT	G	AO=7	DP=425	frameshift_variant
04 Pool	12	04 Pool_12 plate_02 well	NO04G01090	GTCGAAGGGATGGAACACGG	HPP family protein	chr4: 344726	G	GA,GT,GTGTT	AO=7,2,1	DP=227	frameshift_variant
04 Pool	12	04 Pool_12 plate_03 well	NO02G02620	GCAGTCTCTTCGCGCCACAG	Transmembrane protein 144;Transmembrane protein 144;Sugar transporter	chr2: 727752	CCA	C	AO=2	DP=234	frameshift_variant
04 Pool	12	04 Pool_12 plate_04 well	NO08G01470	ACGATCTCTTCACTGCCAAG	Retinol dehydrogenase	chr8: 462440	TG	T	AO=1	DP=246	frameshift_variant
04 Pool	12	04 Pool_12 plate_05 well	NO08G01440	TGAGTCCCCAAGATTCCTCG	Unknown protein	chr8: 447407	AG	A	AO=23	DP=268	frameshift_variant
04 Pool	12	04 Pool_12 plate_06 well	NO04G03750	GGACATGGTCCAATATCCTG	Protein of unknown function (DUF1295)	chr4: 1014280	AG	A,AGG	AO=5,1	DP=254	frameshift_variant
04 Pool	12	04 Pool_12 plate_06 well	NO07G04010	ATGGACAAACCATTCGACGG	Unknown protein	chr7: 1117146	C	CG,A	AO=1,1	DP=67	frameshift_variant
04 Pool	12	04 Pool_12 plate_07 well	NO14G03240	GCCGCGGTGGTAAAGAACGA	Proteasome subunit alpha type	chr14: 971190	AACG	A	AO=2	DP=140	disruptive_inframe_deletion
04 Pool	12	04 Pool_12 plate_08 well	NO04G00270	AAAGTTGTGGCATGTTCGTG	Peptidyl-prolyl cis-trans isomerase	chr4: 119781	GCCCCACGAACATG	G,GCC	AO=1,2	DP=210	frameshift_variant
04 Pool	12	04 Pool_12 plate_09 well	NO02G02620	GCAGTCTCTTCGCGCCACAG	Transmembrane protein 144;Transmembrane protein 144;Sugar transporter	chr2: 727752	CCA	C	AO=2	DP=234	frameshift_variant
04 Pool	12	04 Pool_12 plate_10 well	NO07G04010	ATGGACAAACCATTCGACGG	Unknown protein	chr7: 1117146	C	CG,A	AO=1,1	DP=67	frameshift_variant
04 Pool	12	04 Pool_12 plate_11 well	NO03G04530	GAGGGTCGTCTTCGTCTCTG	Fatty-acid-ligase fadd9	chr3: 1304140	CAG	C,CAGTAACCCTAACAG	AO=2,1	DP=181	frameshift_variant
04 Pool	12	04 Pool_12 plate_14 well	NO07G04010	ATGGACAAACCATTCGACGG	Unknown protein	chr7: 1117146	C	CG,A	AO=1,1	DP=67	frameshift_variant
04 Pool	12	04 Pool_12 plate_14 well	NO03G04530	GAGGGTCGTCTTCGTCTCTG	Fatty-acid-ligase fadd9	chr3: 1304140	CAG	C,CAGTAACCCTAACAG	AO=2,1	DP=181	frameshift_variant
04 Pool	12	04 Pool_12 plate_15 well	NO03G04530	GAGGGTCGTCTTCGTCTCTG	Fatty-acid-ligase fadd9	chr3: 1304140	CAG	C,CAGTAACCCTAACAG	AO=2,1	DP=181	frameshift_variant
04 Pool	12	04 Pool_12 plate_16 well	NO04G04840	GATGCAGGAATAAGGTCTGG	Unknown protein	chr4: 1322878	ATAAGGTC	A,ATAAGG,ATAAGGT	AO=1,1,1	DP=222	frameshift_variant
04 Pool	12	04 Pool_12 plate_17 well	NO02G02500	ACCACCCTTGACGAGCCATG	Unknown protein	chr2: 691501	TG	T,TGG	AO=1,1	DP=302	frameshift_variant
04 Pool	12	04 Pool_12 plate_21 well	NO04G00260	CGTTGAAGGCATCACCGTCG	Yippee-like protein;Yippee-like protein	chr4: 119072	G	GT	AO=5	DP=239	frameshift_variant
04 Pool	12	04 Pool_12 plate_22 well	NO10G02190	CTTGGGGCACATACAACCCA	Threonine synthase	chr10: 600028	G	T	AO=2	DP=255	missense_variant
04 Pool	13	04 Pool_13 plate_01 well	NO03G03670	GAGGCGAATGACATGCCACG	Na(+)/H(+) antiporter NhaA	chr3: 1090319	GCCA	A,GCA,GC,GCCCA,GCCAA,GCCGA	AO=1,11,1,1,3,1	DP=258	frameshift_variant
04 Pool	13	04 Pool_13 plate_01 well	NO01G04120	CGAAGGCGGATATCAACAGG	Signal recognition particle-docking protein FtsY	chr1: 1100603	T	TAACCCTAACCCTAACAGA	AO=2	DP=172	disruptive_inframe_insertion
04 Pool	13	04 Pool_13 plate_02 well	NO16G00660	TTGATGTGGACAGCTGTGGG	Arsenite inducuble rna associated protein aip	chr16: 231443	CCA	C	AO=11	DP=233	frameshift_variant
04 Pool	13	04 Pool_13 plate_02 well	NO03G03670	GAGGCGAATGACATGCCACG	Na(+)/H(+) antiporter NhaA	chr3: 1090319	GCCA	A,GCA,GC,GCCCA,GCCAA,GCCGA	AO=1,11,1,1,3,1	DP=258	frameshift_variant
04 Pool	13	04 Pool_13 plate_03 well	NO03G03670	GAGGCGAATGACATGCCACG	Na(+)/H(+) antiporter NhaA	chr3: 1090319	GCCA	A,GCA,GC,GCCCA,GCCAA,GCCGA	AO=1,11,1,1,3,1	DP=258	frameshift_variant
04 Pool	13	04 Pool_13 plate_03 well	NO01G04120	CGAAGGCGGATATCAACAGG	Signal recognition particle-docking protein FtsY	chr1: 1100603	T	TAACCCTAACCCTAACAGA	AO=2	DP=172	disruptive_inframe_insertion
04 Pool	13	04 Pool_13 plate_03 well	NO22G00470	TTTGGAGTACTTGAATGACG	Unknown protein	chr22: 163327	CATTC	AA,TC,CATCC	AO=1,1,1	DP=136	missense_variant&disruptive_inframe_deletion
04 Pool	13	04 Pool_13 plate_04 well	NO10G01410	CATCTACTCCTTGAGCAACG	Serine threonine-protein phosphatase 6 regulatory	chr10: 414882	T	TT,TC	AO=1,1	DP=235	frameshift_variant
04 Pool	13	04 Pool_13 plate_04 well	NO03G03670	GAGGCGAATGACATGCCACG	Na(+)/H(+) antiporter NhaA	chr3: 1090319	GCCA	A,GCA,GC,GCCCA,GCCAA,GCCGA	AO=1,11,1,1,3,1	DP=258	frameshift_variant
04 Pool	13	04 Pool_13 plate_04 well	NO01G04120	CGAAGGCGGATATCAACAGG	Signal recognition particle-docking protein FtsY	chr1: 1100603	T	TAACCCTAACCCTAACAGA	AO=2	DP=172	disruptive_inframe_insertion
04 Pool	13	04 Pool_13 plate_05 well	NO03G03670	GAGGCGAATGACATGCCACG	Na(+)/H(+) antiporter NhaA	chr3: 1090319	GCCA	A,GCA,GC,GCCCA,GCCAA,GCCGA	AO=1,11,1,1,3,1	DP=258	frameshift_variant
04 Pool	13	04 Pool_13 plate_05 well	NO01G04120	CGAAGGCGGATATCAACAGG	Signal recognition particle-docking protein FtsY	chr1: 1100603	T	TAACCCTAACCCTAACAGA	AO=2	DP=172	disruptive_inframe_insertion
04 Pool	13	04 Pool_13 plate_06 well	NO03G03670	GAGGCGAATGACATGCCACG	Na(+)/H(+) antiporter NhaA	chr3: 1090319	GCCA	A,GCA,GC,GCCCA,GCCAA,GCCGA	AO=1,11,1,1,3,1	DP=258	frameshift_variant
04 Pool	13	04 Pool_13 plate_06 well	NO14G00540	TCGACACGTTGGCAGCAATG	ferric reduction oxidase 2	chr14: 217231	TGGCAGCAATGGGGTA	T,TGGCAGCATGGGGTA,TGGTAGCAATGGGGTA	AO=1,1,1	DP=213	frameshift_variant
04 Pool	13	04 Pool_13 plate_06 well	NO01G04120	CGAAGGCGGATATCAACAGG	Signal recognition particle-docking protein FtsY	chr1: 1100603	T	TAACCCTAACCCTAACAGA	AO=2	DP=172	disruptive_inframe_insertion
04 Pool	13	04 Pool_13 plate_07 well	NO03G03670	GAGGCGAATGACATGCCACG	Na(+)/H(+) antiporter NhaA	chr3: 1090319	GCCA	A,GCA,GC,GCCCA,GCCAA,GCCGA	AO=1,11,1,1,3,1	DP=258	frameshift_variant
04 Pool	13	04 Pool_13 plate_08 well	NO03G03670	GAGGCGAATGACATGCCACG	Na(+)/H(+) antiporter NhaA	chr3: 1090319	GCCA	A,GCA,GC,GCCCA,GCCAA,GCCGA	AO=1,11,1,1,3,1	DP=258	frameshift_variant
04 Pool	13	04 Pool_13 plate_08 well	NO01G04120	CGAAGGCGGATATCAACAGG	Signal recognition particle-docking protein FtsY	chr1: 1100603	T	TAACCCTAACCCTAACAGA	AO=2	DP=172	disruptive_inframe_insertion
04 Pool	13	04 Pool_13 plate_09 well	NO03G03670	GAGGCGAATGACATGCCACG	Na(+)/H(+) antiporter NhaA	chr3: 1090319	GCCA	A,GCA,GC,GCCCA,GCCAA,GCCGA	AO=1,11,1,1,3,1	DP=258	frameshift_variant
04 Pool	13	04 Pool_13 plate_09 well	NO01G04120	CGAAGGCGGATATCAACAGG	Signal recognition particle-docking protein FtsY	chr1: 1100603	T	TAACCCTAACCCTAACAGA	AO=2	DP=172	disruptive_inframe_insertion
04 Pool	13	04 Pool_13 plate_09 well	NO28G00190	TCTGCACCATCGCAATCACA	ubiquitin 8	chr28: 77846	GTGA	G	AO=6	DP=242	disruptive_inframe_deletion
04 Pool	13	04 Pool_13 plate_10 well	NO21G01750	GGAGCTACTTCATCCCCGCG	Unknown protein	chr21: 526006	CGG	C,CGC	AO=8,1	DP=229	frameshift_variant
04 Pool	13	04 Pool_13 plate_10 well	NO03G03670	GAGGCGAATGACATGCCACG	Na(+)/H(+) antiporter NhaA	chr3: 1090319	GCCA	A,GCA,GC,GCCCA,GCCAA,GCCGA	AO=1,11,1,1,3,1	DP=258	frameshift_variant
04 Pool	13	04 Pool_13 plate_10 well	NO01G04120	CGAAGGCGGATATCAACAGG	Signal recognition particle-docking protein FtsY	chr1: 1100603	T	TAACCCTAACCCTAACAGA	AO=2	DP=172	disruptive_inframe_insertion
04 Pool	13	04 Pool_13 plate_11 well	NO03G03750	AATATCAACGAAAAGGTACG	U1 small nuclear ribonucleoprotein a	chr3: 1109573	T	TT,TA	AO=1,3	DP=253	frameshift_variant
04 Pool	13	04 Pool_13 plate_11 well	NO03G03670	GAGGCGAATGACATGCCACG	Na(+)/H(+) antiporter NhaA	chr3: 1090319	GCCA	A,GCA,GC,GCCCA,GCCAA,GCCGA	AO=1,11,1,1,3,1	DP=258	frameshift_variant
04 Pool	13	04 Pool_13 plate_12 well	NO01G04120	CGAAGGCGGATATCAACAGG	Signal recognition particle-docking protein FtsY	chr1: 1100603	T	TAACCCTAACCCTAACAGA	AO=2	DP=172	disruptive_inframe_insertion
04 Pool	13	04 Pool_13 plate_12 well	NO03G03670	GAGGCGAATGACATGCCACG	Na(+)/H(+) antiporter NhaA	chr3: 1090319	GCCA	A,GCA,GC,GCCCA,GCCAA,GCCGA	AO=1,11,1,1,3,1	DP=258	frameshift_variant
04 Pool	13	04 Pool_13 plate_13 well	NO01G04120	CGAAGGCGGATATCAACAGG	Signal recognition particle-docking protein FtsY	chr1: 1100603	T	TAACCCTAACCCTAACAGA	AO=2	DP=172	disruptive_inframe_insertion
04 Pool	13	04 Pool_13 plate_13 well	NO03G03670	GAGGCGAATGACATGCCACG	Na(+)/H(+) antiporter NhaA	chr3: 1090319	GCCA	A,GCA,GC,GCCCA,GCCAA,GCCGA	AO=1,11,1,1,3,1	DP=258	frameshift_variant
04 Pool	13	04 Pool_13 plate_14 well	NO26G01330	GGTCCAACAAAAGGAGACAG	Checkpoint protein Rad24	chr26: 427460	G	GG,A	AO=1,1	DP=301	frameshift_variant
04 Pool	13	04 Pool_13 plate_14 well	NO03G03670	GAGGCGAATGACATGCCACG	Na(+)/H(+) antiporter NhaA	chr3: 1090319	GCCA	A,GCA,GC,GCCCA,GCCAA,GCCGA	AO=1,11,1,1,3,1	DP=258	frameshift_variant
04 Pool	13	04 Pool_13 plate_15 well	NO03G03670	GAGGCGAATGACATGCCACG	Na(+)/H(+) antiporter NhaA	chr3: 1090319	GCCA	A,GCA,GC,GCCCA,GCCAA,GCCGA	AO=1,11,1,1,3,1	DP=258	frameshift_variant
04 Pool	13	04 Pool_13 plate_15 well	NO03G05050	CGTAGACCCGCAACTCGACG	PPPDE putative thiol peptidase family protein	chr3: 1431503	T	TCC	AO=2	DP=280	frameshift_variant
04 Pool	13	04 Pool_13 plate_15 well	NO01G04120	CGAAGGCGGATATCAACAGG	Signal recognition particle-docking protein FtsY	chr1: 1100603	T	TAACCCTAACCCTAACAGA	AO=2	DP=172	disruptive_inframe_insertion
04 Pool	13	04 Pool_13 plate_16 well	NO21G00200	ATTAGAAGGGAAGGGGTACG	Carboxypeptidase taq	chr21: 60986	A	C	AO=2	DP=249	synonymous_variant
04 Pool	13	04 Pool_13 plate_16 well	NO03G03670	GAGGCGAATGACATGCCACG	Na(+)/H(+) antiporter NhaA	chr3: 1090319	GCCA	A,GCA,GC,GCCCA,GCCAA,GCCGA	AO=1,11,1,1,3,1	DP=258	frameshift_variant
04 Pool	13	04 Pool_13 plate_16 well	NO01G04120	CGAAGGCGGATATCAACAGG	Signal recognition particle-docking protein FtsY	chr1: 1100603	T	TAACCCTAACCCTAACAGA	AO=2	DP=172	disruptive_inframe_insertion
04 Pool	13	04 Pool_13 plate_17 well	NO03G03670	GAGGCGAATGACATGCCACG	Na(+)/H(+) antiporter NhaA	chr3: 1090319	GCCA	A,GCA,GC,GCCCA,GCCAA,GCCGA	AO=1,11,1,1,3,1	DP=258	frameshift_variant
04 Pool	13	04 Pool_13 plate_17 well	NO01G04120	CGAAGGCGGATATCAACAGG	Signal recognition particle-docking protein FtsY	chr1: 1100603	T	TAACCCTAACCCTAACAGA	AO=2	DP=172	disruptive_inframe_insertion
04 Pool	13	04 Pool_13 plate_18 well	NO03G03670	GAGGCGAATGACATGCCACG	Na(+)/H(+) antiporter NhaA	chr3: 1090319	GCCA	A,GCA,GC,GCCCA,GCCAA,GCCGA	AO=1,11,1,1,3,1	DP=258	frameshift_variant
04 Pool	13	04 Pool_13 plate_18 well	NO01G04120	CGAAGGCGGATATCAACAGG	Signal recognition particle-docking protein FtsY	chr1: 1100603	T	TAACCCTAACCCTAACAGA	AO=2	DP=172	disruptive_inframe_insertion
04 Pool	13	04 Pool_13 plate_19 well	NO03G03670	GAGGCGAATGACATGCCACG	Na(+)/H(+) antiporter NhaA	chr3: 1090319	GCCA	A,GCA,GC,GCCCA,GCCAA,GCCGA	AO=1,11,1,1,3,1	DP=258	frameshift_variant
04 Pool	13	04 Pool_13 plate_20 well	NO03G03670	GAGGCGAATGACATGCCACG	Na(+)/H(+) antiporter NhaA	chr3: 1090319	GCCA	A,GCA,GC,GCCCA,GCCAA,GCCGA	AO=1,11,1,1,3,1	DP=258	frameshift_variant
04 Pool	13	04 Pool_13 plate_20 well	NO01G04120	CGAAGGCGGATATCAACAGG	Signal recognition particle-docking protein FtsY	chr1: 1100603	T	TAACCCTAACCCTAACAGA	AO=2	DP=172	disruptive_inframe_insertion
04 Pool	13	04 Pool_13 plate_21 well	NO03G03670	GAGGCGAATGACATGCCACG	Na(+)/H(+) antiporter NhaA	chr3: 1090319	GCCA	A,GCA,GC,GCCCA,GCCAA,GCCGA	AO=1,11,1,1,3,1	DP=258	frameshift_variant
04 Pool	13	04 Pool_13 plate_23 well	NO03G03670	GAGGCGAATGACATGCCACG	Na(+)/H(+) antiporter NhaA	chr3: 1090319	GCCA	A,GCA,GC,GCCCA,GCCAA,GCCGA	AO=1,11,1,1,3,1	DP=258	frameshift_variant
04 Pool	13	04 Pool_13 plate_23 well	NO01G04120	CGAAGGCGGATATCAACAGG	Signal recognition particle-docking protein FtsY	chr1: 1100603	T	TAACCCTAACCCTAACAGA	AO=2	DP=172	disruptive_inframe_insertion
04 Pool	13	04 Pool_13 plate_20 well	NO24G01820	GGTCGCGACTAATGCAACAG	Unknown protein	chr24: 481633	G	GA	AO=1	DP=234	frameshift_variant
04 Pool	14	04 Pool_14 plate_01 well	NO10G01730	TGGACAGAGGCCGAGCTTCG	Papain family cysteine protease containing protein;Papain family cysteine protease containing protein	chr10: 482909	TC	TTG,C,TTC,CTC,TTCC	AO=1,1,6,1,1	DP=198	frameshift_variant
04 Pool	14	04 Pool_14 plate_02 well	NO19G00250	GGATGGTAAAGGCAAAAACA	Unknown protein	chr19: 101635	TTGC	TGC,GC,TTTGC,TTGT	AO=1,1,2,1	DP=286	frameshift_variant
04 Pool	14	04 Pool_14 plate_03 well	NO12G02880	AGATCCATGAGAATACGGCA	Solute carrier family 25 member 45	chr12: 800559	GC	G	AO=15	DP=336	frameshift_variant
04 Pool	14	04 Pool_14 plate_05 well	NO19G00250	GGATGGTAAAGGCAAAAACA	Unknown protein	chr19: 101635	TTGC	TGC,GC,TTTGC,TTGT	AO=1,1,2,1	DP=286	frameshift_variant
04 Pool	14	04 Pool_14 plate_06 well	NO19G00250	GGATGGTAAAGGCAAAAACA	Unknown protein	chr19: 101635	TTGC	TGC,GC,TTTGC,TTGT	AO=1,1,2,1	DP=286	frameshift_variant
04 Pool	14	04 Pool_14 plate_07 well	NO06G03420	ATACGCATTAAAAAAGGACA	Shikimate transporter 3	chr6: 949113	GAC	G	AO=9	DP=310	frameshift_variant
04 Pool	14	04 Pool_14 plate_08 well	NO01G04190	TCACCTACGACAATTCCGAG	Plasma intrinsic protein 2-7	chr1: 1121103	TC	T	AO=11	DP=254	frameshift_variant
04 Pool	14	04 Pool_14 plate_09 well	NO06G00560	ACTTATTACCTTAAGCAACG	Abc transporter atp-binding protein	chr6: 221713	TG	GTG,TA	AO=1,1	DP=263	frameshift_variant
04 Pool	14	04 Pool_14 plate_09 well	NO24G02270	CATCATCTATCCATACACCA	Unknown protein	chr24: 608651	TG	T	AO=5	DP=326	frameshift_variant
04 Pool	14	04 Pool_14 plate_10 well	NO12G01200	TTTGTGCGGCTGCACTACCC	Ubiquitin-conjugating enzyme	chr12: 375841	T	TA	AO=1	DP=269	frameshift_variant
04 Pool	14	04 Pool_14 plate_11 well	NO03G04530	GAGGGTCGTCTTCGTCTCTG	Fatty-acid-ligase fadd9	chr3: 1304142	GAG	G,GA,GCAG	AO=1,2,1	DP=214	frameshift_variant
04 Pool	14	04 Pool_14 plate_12 well	NO17G01570	CATGGTGGCTGACATCTGGG	Myo-inositol 2-dehydrogenase	chr17: 462703	ATC	A	AO=1	DP=266	frameshift_variant
04 Pool	14	04 Pool_14 plate_12 well	NO10G01730	TGGACAGAGGCCGAGCTTCG	Papain family cysteine protease containing protein;Papain family cysteine protease containing protein	chr10: 482909	TC	TTG,C,TTC,CTC,TTCC	AO=1,1,6,1,1	DP=198	frameshift_variant
04 Pool	14	04 Pool_14 plate_13 well	NO03G00190	TTAGCAAAGACGGTTGTGGG	Metabotropic glutamate receptor-like protein E	chr3: 49983	CCA	C	AO=5	DP=294	frameshift_variant
04 Pool	14	04 Pool_14 plate_15 well	NO03G04530	GAGGGTCGTCTTCGTCTCTG	Fatty-acid-ligase fadd9	chr3: 1304142	GAG	G,GA,GCAG	AO=1,2,1	DP=214	frameshift_variant
04 Pool	14	04 Pool_14 plate_15 well	NO27G00030	CAACATAAAATCATGCCTGG	Unknown protein;Unknown protein	chr27: 7583	GC	G	AO=1	DP=266	frameshift_variant
04 Pool	14	04 Pool_14 plate_16 well	NO18G00440	TAGGGTATAGTTGATCGAGG	Endonuclease III;Endonuclease III	chr18: 184105	TC	TAT,T	AO=1,3	DP=155	frameshift_variant
04 Pool	14	04 Pool_14 plate_16 well	NO19G00250	GGATGGTAAAGGCAAAAACA	Unknown protein	chr19: 101635	TTGC	TGC,GC,TTTGC,TTGT	AO=1,1,2,1	DP=286	frameshift_variant
04 Pool	14	04 Pool_14 plate_18 well	NO10G02430	GTTGCACTTGAGGAGGACGA	L-ascorbate peroxidase	chr10: 662457	G	GC	AO=1	DP=157	frameshift_variant
04 Pool	14	04 Pool_14 plate_21 well	NO01G02680	GGAAGTATACGTTAGCATCG	Exocyst complex	chr1: 693264	A	AG	AO=2	DP=339	frameshift_variant
04 Pool	14	04 Pool_14 plate_22 well	NO22G00930	CCAGCAGCAAAAGAGAACGG	Mitochondrion protein	chr22: 297148	GAA	CAAT,GAAA,GAAT	AO=1,5,3	DP=269	frameshift_variant&missense_variant
04 Pool	14	04 Pool_14 plate_22 well	NO01G02680	GGAAGTATACGTTAGCATCG	Exocyst complex	chr1: 693264	A	AG	AO=2	DP=339	frameshift_variant
04 Pool	14	04 Pool_14 plate_23 well	NO24G02270	CATCATCTATCCATACACCA	Unknown protein	chr24: 608651	TG	T	AO=5	DP=326	frameshift_variant
04 Pool	14	04 Pool_14 plate_24 well	NO15G02830	AGACGTCTGTATCGACACCG	Glycosyl transferase	chr15: 773986	GGT	G,GGAT,GGTT	AO=1,4,6	DP=300	frameshift_variant
04 Pool	15	04 Pool_15 plate_02 well	NO02G05960	CAGCACCTTTAGCGACAATG	Unknown protein	chr2: 1589327	C	CA	AO=1	DP=134	frameshift_variant
04 Pool	15	04 Pool_15 plate_03 well	NO28G01060	AAAACGCGTAAAGTATCCTG	Brix domain containing 1	chr28: 337522	AG	A	AO=11	DP=257	frameshift_variant
04 Pool	15	04 Pool_15 plate_04 well	NO08G01110	TGGCAAGGTATACCACCATG	Nucleic acid-binding protein	chr8: 353795	ATACCACCAT	A,ATACCACAT,ATACCACCCAT	AO=1,10,2	DP=236	frameshift_variant
04 Pool	15	04 Pool_15 plate_05 well	NO20G01410	CCTACAGATCCAGCTGCAGT	Unknown protein	chr20: 428904	CTGCAGT	T,CTGAGT,CTGCGT,CTGC,CTGCAAGT	AO=1,2,1,2,2	DP=169	frameshift_variant
04 Pool	15	04 Pool_15 plate_06 well	NO12G00140	GTTTGGCGTAGGAGAGTCGG	Autophagy-related protein 1010 family protein;Autophagy-related protein 1010 family protein;Autophagy-related protein 1010 family protein	chr12: 40008	CG	G,TCG,ACG,CC	AO=1,1,1,1	DP=255	frameshift_variant
04 Pool	15	04 Pool_15 plate_07 well	NO16G00320	GAGTCAAGGTAGGGAAAATG	Serine/threonine protein kinase	chr16: 119299	CAT	AT,CA	AO=1,1	DP=173	frameshift_variant
04 Pool	15	04 Pool_15 plate_08 well	NO20G01960	CGCGACAGAGGTAATACCGG	Histidine protein methyltransferase 1 homolog	chr20: 583459	CG	C,CC	AO=10,1	DP=214	frameshift_variant
04 Pool	15	04 Pool_15 plate_09 well	NO07G02680	ACTACAAGTATTCTCTCTCG	Abc1 family protein	chr7: 775274	CGAGA	CGA,C,CGAAGA	AO=2,1,1	DP=249	frameshift_variant
04 Pool	15	04 Pool_15 plate_10 well	NO29G00380	TTCATGTCGTGCGTGTGGCG	Unknown protein	chr29: 157951	GC	G,GCA	AO=2,1	DP=222	frameshift_variant
04 Pool	15	04 Pool_15 plate_11 well	NO02G05670	GCTTCCCAGAATAACCACCG	NADH dehydrogenase, putative	chr2: 1505338	AACC	A,AACCA,AACCAA,AACCAG	AO=1,1,6,1	DP=234	frameshift_variant
04 Pool	15	04 Pool_15 plate_13 well	NO14G02940	GAAACTGGAAAAGTAGTACA	Peptidase m48 ste24p	chr14: 876671	T	TA	AO=11	DP=254	frameshift_variant&stop_gained
04 Pool	15	04 Pool_15 plate_14 well	NO13G00840	GGAAGGCCGGAGCTATTGTG	Unknown protein	chr13: 278152	CA	C	AO=10	DP=252	frameshift_variant
04 Pool	15	04 Pool_15 plate_17 well	NO20G00530	ACCGTGATGGTAAACGATGG	Pentatricopeptide repeat containing protein	chr20: 181364	A	AA,AC,AG,AT	AO=2,2,1,2	DP=216	frameshift_variant
04 Pool	15	04 Pool_15 plate_18 well	NO08G02950	GAGTGACATACACGCCATGG	Unknown protein	chr8: 823784	TGGAGGAC	GA,GAGGAC	AO=1,6	DP=236	frameshift_variant
04 Pool	15	04 Pool_15 plate_19 well	NO30G00380	GCCAGACCAAGAGAACGCAG	proline iminopeptidase	chr30: 169397	C	CG,CGG	AO=1,2	DP=255	frameshift_variant
04 Pool	15	04 Pool_15 plate_20 well	NO30G00380	GCCAGACCAAGAGAACGCAG	proline iminopeptidase	chr30: 169397	C	CG,CGG	AO=1,2	DP=255	frameshift_variant
04 Pool	15	04 Pool_15 plate_21 well	NO27G01040	GCAGCGTGAGTAGAAACGTG	Aminoglycoside phosphotransferase	chr27: 340025	A	AC	AO=4	DP=245	frameshift_variant
04 Pool	15	04 Pool_15 plate_24 well	NO14G00490	CATGTCATACGGGTCGCGGT	Unknown protein	chr14: 191430	CG	C	AO=14	DP=233	frameshift_variant
04 Pool	15	04 Pool_15 plate_15 well	NO03G03680	CGGCGGTAGTGTGAACGAAG	Phosphatidylinositol-4-phosphate 5-kinase	chr3: 1092548	TC	T	AO=7	DP=190	frameshift_variant
04 Pool	16	04 Pool_16 plate_01 well	NO16G01610	GGGAAGCGCTCATCCTTGGC	Cytochrome c oxidase polypeptide vib	chr16: 486150	CTTGGCGGGC	CTTGCG,C,CTTGGTGGGC,CTTGGCGGAC	AO=3,4,2,1	DP=219	frameshift_variant&missense_variant
04 Pool	16	04 Pool_16 plate_03 well	NO04G02850	CAACGCCGTCGATCACCCGG	Unknown protein	chr4: 751251	AC	A,ACC,ACT,AA	AO=2,1,2,1	DP=229	frameshift_variant
04 Pool	16	04 Pool_16 plate_04 well	NO16G02450	CAATGGTTTATGGAGCACAA	Histone-lysine n-methyltransferase setd3 isoform a	chr16: 706953	TTG	T,TTGT	AO=7,2	DP=255	frameshift_variant
04 Pool	16	04 Pool_16 plate_05 well	NO10G03400	CGAGAACAACAAACGCTGGG	Carbonic anhydrase	chr10: 960597	AC	A	AO=1	DP=222	frameshift_variant
04 Pool	16	04 Pool_16 plate_07 well	NO19G01920	TAAGTGAGGGAGACCTGGTG	Protein pelota homolog	chr19: 567859	C	CC,CA,T	AO=6,12,1	DP=207	frameshift_variant
04 Pool	16	04 Pool_16 plate_09 well	NO15G00620	GGCGGACAAAGATCCCCGTG	Unknown protein	chr15: 204917	CGG	CG,C,CTGG,CACTGG	AO=1,2,1,1	DP=228	frameshift_variant
04 Pool	16	04 Pool_16 plate_09 well	NO24G00390	AAGGATGTGCATGAGTACGT	Gtp-binding protein;Gtp-binding protein;Gtpase;Gtp-binding protein;Gtp-binding protein;Gtp-binding protein	chr24: 138620	T	TA	AO=11	DP=264	frameshift_variant
04 Pool	16	04 Pool_16 plate_09 well	NO24G02370	GACGACAGATCGGTTTGTGG	EH domain-containing protein 2	chr24: 653520	CCA	C	AO=1	DP=220	frameshift_variant
04 Pool	16	04 Pool_16 plate_10 well	NO04G04440	ACGAGCACCAGCATAACGTA	Unknown protein	chr4: 1206575	TTATG	TATG,GTTATG,TTATT	AO=1,5,1	DP=236	frameshift_variant
04 Pool	16	04 Pool_16 plate_12 well	NO27G00450	GCGGGTGTTCCTCCGCACTG	Kin2p	chr27: 169936	CGCAC	C,CGCA,CACAC	AO=1,1,1	DP=220	frameshift_variant
04 Pool	16	04 Pool_16 plate_12 well	NO10G03400	CGAGAACAACAAACGCTGGG	Carbonic anhydrase	chr10: 960597	AC	A	AO=1	DP=222	frameshift_variant
04 Pool	16	04 Pool_16 plate_13 well	NO24G02370	GACGACAGATCGGTTTGTGG	EH domain-containing protein 2	chr24: 653520	CCA	C	AO=1	DP=220	frameshift_variant
04 Pool	16	04 Pool_16 plate_14 well	NO13G03200	GTTAGACATCCATCACCGCG	Zn(2)-C6 fungal-type DNA-binding domain protein	chr13: 932646	TCAC	T	AO=10	DP=223	disruptive_inframe_deletion
04 Pool	16	04 Pool_16 plate_14 well	NO01G02680	GGAAGTATACGTTAGCATCG	Exocyst complex	chr1: 693264	AT	A	AO=1	DP=309	frameshift_variant
04 Pool	16	04 Pool_16 plate_15 well	NO03G00690	AACCACACTCTATCGCCATG	Unknown protein	chr3: 224670	TG	T	AO=1	DP=113	frameshift_variant
04 Pool	16	04 Pool_16 plate_16 well	NO02G04510	GAACCATCGGTACTGTACGA	TRAM, LAG1 and CLN8 lipid-sensing domain containing protein	chr2: 1219137	A	AT	AO=4	DP=254	frameshift_variant
04 Pool	16	04 Pool_16 plate_18 well	NO18G01480	ACACCACAGTCATACACACA	Dynamin like protein	chr18: 487246	TAC	T	AO=5	DP=237	frameshift_variant
04 Pool	16	04 Pool_16 plate_21 well	NO01G02680	GGAAGTATACGTTAGCATCG	Exocyst complex	chr1: 693264	AT	A	AO=1	DP=309	frameshift_variant
04 Pool	16	04 Pool_16 plate_21 well	NO10G03400	CGAGAACAACAAACGCTGGG	Carbonic anhydrase	chr10: 960597	AC	A	AO=1	DP=222	frameshift_variant
04 Pool	16	04 Pool_16 plate_22 well	NO01G02680	GGAAGTATACGTTAGCATCG	Exocyst complex	chr1: 693264	AT	A	AO=1	DP=309	frameshift_variant
04 Pool	16	04 Pool_16 plate_23 well	NO24G00390	AAGGATGTGCATGAGTACGT	Gtp-binding protein;Gtp-binding protein;Gtpase;Gtp-binding protein;Gtp-binding protein;Gtp-binding protein	chr24: 138620	T	TA	AO=11	DP=264	frameshift_variant
04 Pool	16	04 Pool_16 plate_23 well	NO24G02370	GACGACAGATCGGTTTGTGG	EH domain-containing protein 2	chr24: 653520	CCA	C	AO=1	DP=220	frameshift_variant
04 Pool	16	04 Pool_16 plate_24 well	NO05G02080	TGGTAAATTCTTCGACAGCA	Aminoglycoside phosphotransferase	chr5: 563076	CTG	C	AO=1	DP=244	frameshift_variant
04 Pool	17	04 Pool_17 plate_02 well	NO04G00420	GAGGACCACGTCACCCACAG	Unknown protein	chr4: 168647	CTG	C,CT,CTGG,CTGC,CTGT	AO=1,1,2,1,1	DP=169	frameshift_variant
04 Pool	17	04 Pool_17 plate_04 well	NO23G00740	ACTCTGGCTGCAATCCTGCG	Transducin/WD40 repeat-like superfamily protein	chr23: 282669	ATCC	A	AO=3	DP=171	disruptive_inframe_deletion
04 Pool	17	04 Pool_17 plate_05 well	NO02G01620	GGAGAGTGTCAAGAGTCTGG	Centromere v-like protein	chr2: 475579	T	TC	AO=4	DP=138	frameshift_variant
04 Pool	17	04 Pool_17 plate_08 well	NO05G03420	GATACTGGGGTCGATCCTGG	Unknown protein	chr5: 902340	CC	C,CA	AO=5,1	DP=157	frameshift_variant
04 Pool	17	04 Pool_17 plate_08 well	NO12G00910	CCCCAGGTAGAATTAGATCG	Iron-sulfur cluster-binding protein	chr12: 297270	TAG	T	AO=1	DP=173	frameshift_variant
04 Pool	17	04 Pool_17 plate_10 well	NO14G02960	TTTTCGCACAAAAAACCCAG	Endonuclease/exonuclease/phosphatase	chr14: 872454	AC	A,ACC,AA	AO=5,4,1	DP=182	frameshift_variant
04 Pool	17	04 Pool_17 plate_11 well	NO18G00600	GAGGAAGGATAACGGTGTCA	P-loop containing nucleoside triphosphate hydrolases superfamily protein	chr18: 254118	G	GC	AO=3	DP=139	frameshift_variant
04 Pool	17	04 Pool_17 plate_12 well	NO12G00910	CCCCAGGTAGAATTAGATCG	Iron-sulfur cluster-binding protein	chr12: 297270	TAG	T	AO=1	DP=173	frameshift_variant
04 Pool	17	04 Pool_17 plate_13 well	NO11G00920	GCTTTATTCAAGGCACAGCG	Violaxanthin de-epoxidase	chr11: 357098	C	CA	AO=3	DP=184	frameshift_variant
04 Pool	17	04 Pool_17 plate_14 well	NO08G00430	TACCAGGAAGGTCGCCGCAG	Unknown protein	chr8: 176834	GCCG	TCCGC,GC,GCCGG,GCCGA,GCCGT	AO=1,2,1,1,2	DP=163	frameshift_variant&missense_variant
04 Pool	17	04 Pool_17 plate_16 well	NO12G00850	GTAGCATATTTACTCAACAG	Unknown protein	chr12: 279852	ACAG	A	AO=4	DP=145	conservative_inframe_deletion
04 Pool	17	04 Pool_17 plate_17 well	NO08G04180	ATACGCTCAGACACATTTCG	Transmembrane protein	chr8: 1206706	AT	A	AO=1	DP=153	frameshift_variant
04 Pool	17	04 Pool_17 plate_18 well	NO20G01420	AAGGAGACCAGATACGATGG	Potassium sodium efflux p-type atpase	chr20: 430920	CCAT	C,CCAAT,CCACT	AO=5,2,1	DP=196	frameshift_variant
04 Pool	17	04 Pool_17 plate_19 well	NO08G02830	ACTACCCGAGAGGACCCGAG	Unknown protein	chr8: 794930	CGG	C	AO=1	DP=181	frameshift_variant
04 Pool	17	04 Pool_17 plate_20 well	NO08G03210	GGCGGCTGCAGAGATAACTG	Palmitoyltransferase	chr8: 882632	A	AT	AO=3	DP=169	frameshift_variant
04 Pool	17	04 Pool_17 plate_21 well	NO24G01200	TTGGAGATAGGAATTGTACG	Chaperone protein	chr24: 328995	ATTG	A,AT,AGTG,GTTG	AO=1,3,1,1	DP=167	frameshift_variant
04 Pool	17	04 Pool_17 plate_23 well	NO12G02380	GCTGTGCTCGACATGTCGGG	E3 ubiquitin-protein ligase listerin	chr12: 686798	GCCCGACATGTCGAGCACAGCGTCC	G	AO=2	DP=157	conservative_inframe_deletion
04 Pool	18	04 Pool_18 plate_02 well	NO23G01170	AAAGAATAGAAGCTGCACAG	Unknown protein	chr23: 429600	A	AC,AG	AO=2,1	DP=165	frameshift_variant
04 Pool	18	04 Pool_18 plate_04 well	NO07G01620	GAAGCGGTAGTCGTTCACGT	White-brown-complex abc transporter family	chr7: 494851	A	AT,C	AO=10,1	DP=171	frameshift_variant
04 Pool	18	04 Pool_18 plate_05 well	NO04G00710	TTGGGCAAACTGGAGCATGG	Snf2 domanin containing helicase;Snf2 domanin containing helicase;Snf2 domanin containing helicase;Snf2 domanin containing helicase	chr4: 247740	CCCCATGCT	CCCATGCT,C,CCCCAGCT,CCCCATTGCT,CCCCATTTGCT	AO=1,1,1,1,1	DP=208	frameshift_variant
04 Pool	18	04 Pool_18 plate_07 well	NO16G03260	TGGGTCAGCAACATGTCCGT	Zinc metalloendopeptidase	chr16: 975642	TC	T	AO=21	DP=273	frameshift_variant
04 Pool	18	04 Pool_18 plate_08 well	NO02G04720	CTGCCGCGAAGAACTGATCG	Aspartyl/asparaginyl beta-hydroxylase	chr2: 1280225	G	GA	AO=8	DP=197	frameshift_variant
04 Pool	18	04 Pool_18 plate_08 well	NO02G04520	GTCCTCTTCTTGGAGCAAGG	Unknown protein	chr2: 1225844	A	AA,AG	AO=3,1	DP=187	frameshift_variant
04 Pool	18	04 Pool_18 plate_12 well	NO24G01990	TGGCTCCAATCCGCGCAATG	Insulin-degrading enzyme	chr24: 523691	T	GC	AO=4	DP=170	frameshift_variant&missense_variant
04 Pool	18	04 Pool_18 plate_14 well	NO07G00290	CTTCCATAAGAGGATGAGGG	Protein of unknown function (DUF962);Protein of unknown function (DUF962)	chr7: 114165	CTCA	C	AO=17	DP=230	conservative_inframe_deletion
04 Pool	18	04 Pool_18 plate_15 well	NO09G03080	CGACGTGGTAGATAAGACGA	Choline dehydrogenase	chr9: 899674	G	GA,GC	AO=7,1	DP=208	frameshift_variant
04 Pool	18	04 Pool_18 plate_17 well	NO05G05030	CGAGGTCCCAGACCCCATGT	Unknown protein	chr5: 1313460	A	AG	AO=17	DP=220	frameshift_variant
04 Pool	18	04 Pool_18 plate_18 well	NO28G00730	TTTTGAAATGCAGTACCGCG	Unknown protein	chr28: 247742	GCAGTAC	G,GCAGT,GCAGTA,GCAGTACC,GCAATAC	AO=4,1,13,1,1	DP=200	frameshift_variant
04 Pool	18	04 Pool_18 plate_19 well	NO09G03240	TCGCTCCTCCCACTTGACCA	Histone methylation DOT1	chr9: 939922	G	GT	AO=6	DP=226	frameshift_variant
04 Pool	18	04 Pool_18 plate_20 well	NO02G04720	CTGCCGCGAAGAACTGATCG	Aspartyl/asparaginyl beta-hydroxylase	chr2: 1280225	G	GA	AO=8	DP=197	frameshift_variant
04 Pool	18	04 Pool_18 plate_21 well	NO03G03210	CATTCGATCGCTCACCACAG	Unknown protein	chr3: 954446	G	GG,GA,GT	AO=6,2,1	DP=210	frameshift_variant&stop_gained
04 Pool	18	04 Pool_18 plate_22 well	NO13G02110	ACTACCTGCTCTGAACCCAG	Regulator of nonsense	chr13: 597974	CAG	AG,CAT	AO=5,1	DP=250	frameshift_variant
04 Pool	18	04 Pool_18 plate_23 well	NO28G00730	TTTTGAAATGCAGTACCGCG	Unknown protein	chr28: 247742	GCAGTAC	G,GCAGT,GCAGTA,GCAGTACC,GCAATAC	AO=4,1,13,1,1	DP=200	frameshift_variant
04 Pool	19	04 Pool_19 plate_01 well	NO02G01830	CCCAGACCAAGAATGTAACG	Palmitoyltransferase;Palmitoyltransferase;Palmitoyltransferase	chr2: 534433	A	AG	AO=1	DP=166	frameshift_variant
04 Pool	19	04 Pool_19 plate_03 well	NO03G00450	GACAGCTCTTTCGCTCCCTG	Solute carrier family 31 (Copper transporters) member 1;Solute carrier family 31 (Copper transporters) member 1	chr3: 143096	GGAGC	GAGC,AGC,GGAGT	AO=8,3,1	DP=159	frameshift_variant
04 Pool	19	04 Pool_19 plate_04 well	NO13G02290	TCGACCCGGAGTATGAGGAG	Hcp beta-lactamase-like protein	chr13: 638579	TCCT	T,TCT,TC,TCC,TCCCT	AO=2,3,1,1,1	DP=183	frameshift_variant
04 Pool	19	04 Pool_19 plate_05 well	NO30G00090	ACGCCGTATTTGGCAAATGG	Unknown protein	chr30: 39004	CATTTGCCAAATACGGCGTC	C,CAGTTTGCCAAATACGGCGTC,CATTTGCCAAATACGGCGTG	AO=1,1,1	DP=158	frameshift_variant
04 Pool	19	04 Pool_19 plate_05 well	NO02G01830	CCCAGACCAAGAATGTAACG	Palmitoyltransferase;Palmitoyltransferase;Palmitoyltransferase	chr2: 534433	A	AG	AO=1	DP=166	frameshift_variant
04 Pool	19	04 Pool_19 plate_06 well	NO04G01760	GTAGCTCATTTCTCTCACGA	Unknown protein	chr4: 520508	A	AA,AG	AO=2,1	DP=127	frameshift_variant
04 Pool	19	04 Pool_19 plate_07 well	NO04G00050	GTCGCCCTCTACACGCACAG	Soluble NSF Attachment Protein (SNAP) Receptor (SNARE)	chr4: 27130	CTG	C	AO=5	DP=153	frameshift_variant
04 Pool	19	04 Pool_19 plate_07 well	NO02G01830	CCCAGACCAAGAATGTAACG	Palmitoyltransferase;Palmitoyltransferase;Palmitoyltransferase	chr2: 534433	A	AG	AO=1	DP=166	frameshift_variant
04 Pool	19	04 Pool_19 plate_10 well	NO13G03430	ACAGCGGGAAGCTTACCCTG	Unknown protein	chr13: 1025927	AC	A,GC	AO=3,1	DP=148	frameshift_variant
04 Pool	19	04 Pool_19 plate_11 well	NO25G00680	TCAAACGCAAATGCATCCCG	Unknown protein	chr25: 187959	C	T	AO=2	DP=100	synonymous_variant
04 Pool	19	04 Pool_19 plate_12 well	NO24G01850	GTCAGAGTGCGAGGTCGATG	Unknown protein	chr24: 491838	T	TT,TC	AO=4,3	DP=171	frameshift_variant
04 Pool	19	04 Pool_19 plate_14 well	NO02G01830	CCCAGACCAAGAATGTAACG	Palmitoyltransferase;Palmitoyltransferase;Palmitoyltransferase	chr2: 534433	A	AG	AO=1	DP=166	frameshift_variant
04 Pool	19	04 Pool_19 plate_16 well	NO11G00900	GCCTAAGGCGATGGCCACGT	Unknown protein	chr11: 354321	GCCA	G,GC,GCCAC	AO=2,2,4	DP=183	frameshift_variant
04 Pool	19	04 Pool_19 plate_17 well	NO04G03840	AATATAAAGAAGTTGACCCG	Unknown protein	chr4: 1036600	CCC	AAACC,CACC,CCA	AO=1,5,1	DP=152	frameshift_variant&missense_variant
04 Pool	19	04 Pool_19 plate_19 well	NO14G02930	TGATGCAACTGCAGCGATCG	Ubiquilin	chr14: 868096	A	AC	AO=1	DP=59	frameshift_variant
04 Pool	19	04 Pool_19 plate_20 well	NO26G01620	TGTCTTGCAAACAAATCCTG	Unknown protein	chr26: 532046	TC	T	AO=1	DP=132	frameshift_variant
04 Pool	19	04 Pool_19 plate_21 well	NO03G05550	GGCGCAGCAAGGTTATAACG	AAA-type ATPase family protein	chr3: 1594313	TA	T,TATATATATAA,TATATATATATAT	AO=4,1,1	DP=148	frameshift_variant
04 Pool	19	04 Pool_19 plate_23 well	NO13G01630	GTTGAGCGCACCGTTCCCCG	Unknown protein	chr13: 485899	TCC	TC,T,TCCC	AO=3,2,1	DP=139	frameshift_variant
04 Pool	20	04 Pool_20 plate_01 well	NO12G02710	GGACCATTTCGATGAGAACG	Ap-2 complex subunit mu;Ap-2 complex subunit mu	chr12: 764039	G	GAA	AO=1	DP=202	frameshift_variant
04 Pool	20	04 Pool_20 plate_02 well	NO04G03080	CACTGGCGTCCTACTCACAG	Lysine-specific demethylase 5d;Lysine-specific demethylase 5d	chr4: 841199	T	A	AO=7	DP=201	missense_variant
04 Pool	20	04 Pool_20 plate_03 well	NO02G02620	GCAGTCTCTTCGCGCCACAG	Transmembrane protein 144;Transmembrane protein 144;Sugar transporter	chr2: 727754	A	AC	AO=2	DP=213	frameshift_variant
04 Pool	20	04 Pool_20 plate_04 well	NO23G01310	GCGATGGAAAGAGTATATGG	tRNA-dihydrouridine(20/20a) synthase;tRNA-dihydrouridine(20/20a) synthase;tRNA-dihydrouridine(20/20a) synthase;tRNA-dihydrouridine(20/20a) synthase;tRNA-dihydrouridine(20/20a) synthase;tRNA-dihydrouridine(20/20a) synthase	chr23: 472906	ATAT	A,ACTAT	AO=8,5	DP=177	frameshift_variant
04 Pool	20	04 Pool_20 plate_04 well	NO19G00640	TCGAACCCGATGGGAGACCA	Unknown protein	chr19: 237939	G	GA,GTT	AO=6,1	DP=209	frameshift_variant
04 Pool	20	04 Pool_20 plate_05 well	NO20G00470	TATGGCGAAATACCAGCCGA	Mitochondrial import tom22-like protein	chr20: 156658	CCAG	C	AO=3	DP=162	disruptive_inframe_deletion
04 Pool	20	04 Pool_20 plate_05 well	NO23G01310	GCGATGGAAAGAGTATATGG	tRNA-dihydrouridine(20/20a) synthase;tRNA-dihydrouridine(20/20a) synthase;tRNA-dihydrouridine(20/20a) synthase;tRNA-dihydrouridine(20/20a) synthase;tRNA-dihydrouridine(20/20a) synthase;tRNA-dihydrouridine(20/20a) synthase	chr23: 472906	ATAT	A,ACTAT	AO=8,5	DP=177	frameshift_variant
04 Pool	20	04 Pool_20 plate_06 well	NO03G04660	CTCCACAAAGTCGATCCAGG	2fe-2s iron-sulfur cluster binding domain protein	chr3: 1333914	C	CC,CG,CGA	AO=1,10,1	DP=195	frameshift_variant
04 Pool	20	04 Pool_20 plate_06 well	NO23G01310	GCGATGGAAAGAGTATATGG	tRNA-dihydrouridine(20/20a) synthase;tRNA-dihydrouridine(20/20a) synthase;tRNA-dihydrouridine(20/20a) synthase;tRNA-dihydrouridine(20/20a) synthase;tRNA-dihydrouridine(20/20a) synthase;tRNA-dihydrouridine(20/20a) synthase	chr23: 472906	ATAT	A,ACTAT	AO=8,5	DP=177	frameshift_variant
04 Pool	20	04 Pool_20 plate_07 well	NO09G03540	ACTAGTGACAGTGAAGACGA	Nicotinamide N-methyltransferase, putative;Nicotinamide N-methyltransferase, putative;Nicotinamide N-methyltransferase, putative;Nicotinamide N-methyltransferase, putative	chr9: 1013037	TGAAGAC	C,T,TGAA,TGAAGAAC,TGAAGATC	AO=2,2,1,1,1	DP=234	frameshift_variant
04 Pool	20	04 Pool_20 plate_08 well	NO03G04660	CTCCACAAAGTCGATCCAGG	2fe-2s iron-sulfur cluster binding domain protein	chr3: 1333914	C	CC,CG,CGA	AO=1,10,1	DP=195	frameshift_variant
04 Pool	20	04 Pool_20 plate_09 well	NO02G02620	GCAGTCTCTTCGCGCCACAG	Transmembrane protein 144;Transmembrane protein 144;Sugar transporter	chr2: 727754	A	AC	AO=2	DP=213	frameshift_variant
04 Pool	20	04 Pool_20 plate_09 well	NO09G03540	ACTAGTGACAGTGAAGACGA	Nicotinamide N-methyltransferase, putative;Nicotinamide N-methyltransferase, putative;Nicotinamide N-methyltransferase, putative;Nicotinamide N-methyltransferase, putative	chr9: 1013037	TGAAGAC	C,T,TGAA,TGAAGAAC,TGAAGATC	AO=2,2,1,1,1	DP=234	frameshift_variant
04 Pool	20	04 Pool_20 plate_13 well	NO10G01390	AGGATTGGAGGATATCTCAG	Unknown protein	chr10: 407174	ATC	A	AO=6	DP=240	frameshift_variant
04 Pool	20	04 Pool_20 plate_14 well	NO01G00780	ACATGCGAAGACGACCCGAA	Unknown protein	chr1: 197785	ACC	A	AO=3	DP=101	frameshift_variant
04 Pool	20	04 Pool_20 plate_15 well	NO23G01310	GCGATGGAAAGAGTATATGG	tRNA-dihydrouridine(20/20a) synthase;tRNA-dihydrouridine(20/20a) synthase;tRNA-dihydrouridine(20/20a) synthase;tRNA-dihydrouridine(20/20a) synthase;tRNA-dihydrouridine(20/20a) synthase;tRNA-dihydrouridine(20/20a) synthase	chr23: 472906	ATAT	A,ACTAT	AO=8,5	DP=177	frameshift_variant
04 Pool	20	04 Pool_20 plate_16 well	NO23G01310	GCGATGGAAAGAGTATATGG	tRNA-dihydrouridine(20/20a) synthase;tRNA-dihydrouridine(20/20a) synthase;tRNA-dihydrouridine(20/20a) synthase;tRNA-dihydrouridine(20/20a) synthase;tRNA-dihydrouridine(20/20a) synthase;tRNA-dihydrouridine(20/20a) synthase	chr23: 472906	ATAT	A,ACTAT	AO=8,5	DP=177	frameshift_variant
04 Pool	20	04 Pool_20 plate_17 well	NO29G00580	GTATTGCTCGAAAAACCCGC	S-formylglutathione hydrolase	chr29: 222248	CG	C	AO=2	DP=216	frameshift_variant
04 Pool	20	04 Pool_20 plate_17 well	NO07G02480	CGAACATTGGAACCCCTGAG	Transmembrane protein 53;Transmembrane protein 53;Transmembrane protein 53	chr7: 717363	TT	GTT,TC	AO=2,1	DP=213	frameshift_variant
04 Pool	20	04 Pool_20 plate_18 well	NO17G00790	TAGAGCGTTATCAGGCATGG	4alpha-methyl-sterol C4-methyl-oxidase	chr17: 268051	A	AA,AT	AO=6,5	DP=198	frameshift_variant
04 Pool	20	04 Pool_20 plate_18 well	NO23G01310	GCGATGGAAAGAGTATATGG	tRNA-dihydrouridine(20/20a) synthase;tRNA-dihydrouridine(20/20a) synthase;tRNA-dihydrouridine(20/20a) synthase;tRNA-dihydrouridine(20/20a) synthase;tRNA-dihydrouridine(20/20a) synthase;tRNA-dihydrouridine(20/20a) synthase	chr23: 472906	ATAT	A,ACTAT	AO=8,5	DP=177	frameshift_variant
04 Pool	20	04 Pool_20 plate_19 well	NO22G01600	ATGGCAGAGAGAATGCGTGG	Trna pseudouridine synthase family protein	chr22: 469880	CGCCACGCATTCTCTCT	C,CACCACGCATTCTCTCT	AO=1,1	DP=149	frameshift_variant
04 Pool	20	04 Pool_20 plate_20 well	NO23G01310	GCGATGGAAAGAGTATATGG	tRNA-dihydrouridine(20/20a) synthase;tRNA-dihydrouridine(20/20a) synthase;tRNA-dihydrouridine(20/20a) synthase;tRNA-dihydrouridine(20/20a) synthase;tRNA-dihydrouridine(20/20a) synthase;tRNA-dihydrouridine(20/20a) synthase	chr23: 472906	ATAT	A,ACTAT	AO=8,5	DP=177	frameshift_variant
04 Pool	20	04 Pool_20 plate_20 well	NO12G02710	GGACCATTTCGATGAGAACG	Ap-2 complex subunit mu;Ap-2 complex subunit mu	chr12: 764039	G	GAA	AO=1	DP=202	frameshift_variant
04 Pool	20	04 Pool_20 plate_22 well	NO15G02120	TAAGGGAACTCAGCAAACCA	Unknown protein	chr15: 596645	GT	G,GTT	AO=3,1	DP=171	frameshift_variant
04 Pool	20	04 Pool_20 plate_23 well	NO03G02430	TGTCACCAAGCACTGCGTAG	GATOR complex protein WDR59;GATOR complex protein WDR59	chr3: 704661	TGCGTA	T,TGCGTTA,TGTGTA	AO=6,1,1	DP=211	frameshift_variant
04 Pool	20	04 Pool_20 plate_20 well	NO03G04370	GCCCAAGAAAACTAAGCACG	Transaldolase	chr3: 1260586	G	GC	AO=5	DP=228	frameshift_variant
04 Pool	21	04 Pool_21 plate_01 well	NO02G00900	GAGCTTCATTAGTCACAAGA	ER membrane protein complex subunit 7 homolog	chr2: 291607	A	AA,AG	AO=1,1	DP=203	frameshift_variant
04 Pool	21	04 Pool_21 plate_01 well	NO25G02100	CGAGGCGGTCCTCAGCAAGG	Serine threonine-protein kinase smg1-like protein	chr25: 670572	GCA	A,GCAA,GCAC	AO=1,3,2	DP=234	frameshift_variant
04 Pool	21	04 Pool_21 plate_02 well	NO22G00390	ATTTACCACTCCATGCAGGG	RING 1A	chr22: 148735	AG	A,AAG,ACG	AO=1,4,1	DP=168	frameshift_variant
04 Pool	21	04 Pool_21 plate_02 well	NO25G02100	CGAGGCGGTCCTCAGCAAGG	Serine threonine-protein kinase smg1-like protein	chr25: 670572	GCA	A,GCAA,GCAC	AO=1,3,2	DP=234	frameshift_variant
04 Pool	21	04 Pool_21 plate_03 well	NO25G02100	CGAGGCGGTCCTCAGCAAGG	Serine threonine-protein kinase smg1-like protein	chr25: 670572	GCA	A,GCAA,GCAC	AO=1,3,2	DP=234	frameshift_variant
04 Pool	21	04 Pool_21 plate_04 well	NO06G03780	CGGCAGGCTGCTACCGAGCT	Unknown protein	chr6: 1047978	CGA	C,CGAA	AO=1,2	DP=172	frameshift_variant
04 Pool	21	04 Pool_21 plate_05 well	NO12G01240	TTGCTAACAATCGCTCACGA	Unknown protein	chr12: 384894	TCGCTCA	T,TCGCTCAA,TCACTCA	AO=1,1,1	DP=179	frameshift_variant
04 Pool	21	04 Pool_21 plate_06 well	NO05G05040	TACACAACAGCAGTAAGTCG	Pyruvate kinase	chr5: 1314419	GACTT	GAATAT,G,GAT,GAATT	AO=4,1,1,2	DP=149	frameshift_variant
04 Pool	21	04 Pool_21 plate_06 well	NO06G03780	CGGCAGGCTGCTACCGAGCT	Unknown protein	chr6: 1047978	CGA	C,CGAA	AO=1,2	DP=172	frameshift_variant
04 Pool	21	04 Pool_21 plate_08 well	NO12G03160	GATGTGTGCGCGGAACCATG	Rhomboid-like protein 10	chr12: 872991	A	AC	AO=1	DP=141	frameshift_variant
04 Pool	21	04 Pool_21 plate_09 well	NO01G02820	TACGGACGAACCGATCGATG	Folate biopterin transporter	chr1: 731102	A	AT	AO=1	DP=183	frameshift_variant
04 Pool	21	04 Pool_21 plate_09 well	NO25G02100	CGAGGCGGTCCTCAGCAAGG	Serine threonine-protein kinase smg1-like protein	chr25: 670572	GCA	A,GCAA,GCAC	AO=1,3,2	DP=234	frameshift_variant
04 Pool	21	04 Pool_21 plate_10 well	NO18G01390	AGCCCTTTCCAACCGCCCGG	Unknown protein	chr18: 468076	CG	C	AO=10	DP=185	frameshift_variant
04 Pool	21	04 Pool_21 plate_11 well	NO25G02030	GGCTTCATTAGACATTTGCG	Chalcone isomerase-like protein	chr25: 638592	CAA	C,CAAA	AO=2,5	DP=140	frameshift_variant
04 Pool	21	04 Pool_21 plate_13 well	NO01G05770	CCTCCTCAAGCGTTGCGGTA	Unknown protein	chr1: 1615285	TGC	T,TGA	AO=1,1	DP=124	frameshift_variant
04 Pool	21	04 Pool_21 plate_15 well	NO02G02990	GCACTGGCTTTACATCACCG	Regulator of chromosome condensation-like protein	chr2: 804725	A	ACA,AA,AC	AO=1,1,1	DP=200	frameshift_variant
04 Pool	21	04 Pool_21 plate_15 well	NO11G02990	TTGCGGCCAGGAGACCCACG	Fad nad-binding domain-containing protein;Fad nad-binding domain-containing protein	chr11: 938339	TG	T	AO=7	DP=186	frameshift_variant
04 Pool	21	04 Pool_21 plate_16 well	NO20G01010	GTGCACACCCACATACTGCG	RNA helicase	chr20: 324368	CAGT	C	AO=2	DP=175	disruptive_inframe_deletion
04 Pool	21	04 Pool_21 plate_17 well	NO12G03130	GAGGAGGGTAAGGATGCCCG	Leucine-rich repeat-containing protein	chr12: 859834	GGGC	GGC,GGCGC,CGGC,GGGT	AO=4,1,2,1	DP=206	frameshift_variant
04 Pool	21	04 Pool_21 plate_19 well	NO19G00850	CTTCATTCACTATCGCAATG	Unknown protein	chr19: 291501	C	CA,T	AO=1,1	DP=206	frameshift_variant
04 Pool	21	04 Pool_21 plate_20 well	NO09G02130	TGAATGTCACGAAAGCTGTG	Unknown protein	chr9: 653871	C	CT	AO=1	DP=228	frameshift_variant
04 Pool	21	04 Pool_21 plate_21 well	NO05G03600	AGCGCCAGTACAATCGACAG	Rna-binding protein 26	chr5: 952065	T	TG	AO=1	DP=194	frameshift_variant
04 Pool	21	04 Pool_21 plate_21 well	NO25G02100	CGAGGCGGTCCTCAGCAAGG	Serine threonine-protein kinase smg1-like protein	chr25: 670572	GCA	A,GCAA,GCAC	AO=1,3,2	DP=234	frameshift_variant
04 Pool	21	04 Pool_21 plate_22 well	NO02G02990	GCACTGGCTTTACATCACCG	Regulator of chromosome condensation-like protein	chr2: 804725	A	ACA,AA,AC	AO=1,1,1	DP=200	frameshift_variant
04 Pool	21	04 Pool_21 plate_23 well	NO25G02100	CGAGGCGGTCCTCAGCAAGG	Serine threonine-protein kinase smg1-like protein	chr25: 670572	GCA	A,GCAA,GCAC	AO=1,3,2	DP=234	frameshift_variant
04 Pool	21	04 Pool_21 plate_23 well	NO02G02990	GCACTGGCTTTACATCACCG	Regulator of chromosome condensation-like protein	chr2: 804725	A	ACA,AA,AC	AO=1,1,1	DP=200	frameshift_variant
04 Pool	21	04 Pool_21 plate_24 well	NO25G02100	CGAGGCGGTCCTCAGCAAGG	Serine threonine-protein kinase smg1-like protein	chr25: 670572	GCA	A,GCAA,GCAC	AO=1,3,2	DP=234	frameshift_variant
04 Pool	22	04 Pool_22 plate_01 well	NO08G00950	GGATCAAAGAGAGACCAACG	Sulfate permease family;Sulfate permease family;Sulfate permease family	chr8: 306483	T	TT,TG	AO=2,1	DP=182	frameshift_variant
04 Pool	22	04 Pool_22 plate_02 well	NO09G00120	AGGAGAAATCTTTACCCTGG	Uv excision repair protein rad23;Uv excision repair protein rad23;Uv excision repair protein rad23	chr9: 75970	C	CA	AO=7	DP=172	frameshift_variant
04 Pool	22	04 Pool_22 plate_03 well	NO21G02640	GATTTCACCCACGAACAAGG	Unknown protein	chr21: 812229	C	CT	AO=1	DP=137	frameshift_variant
04 Pool	22	04 Pool_22 plate_03 well	NO20G02240	GCTTCAACGAGAGGAAACGA	Unknown protein	chr20: 679995	CCTCGTTTCCT	C,CCTCGTTTTCCT	AO=1,1	DP=116	frameshift_variant
04 Pool	22	04 Pool_22 plate_04 well	NO21G02640	GATTTCACCCACGAACAAGG	Unknown protein	chr21: 812229	C	CT	AO=1	DP=137	frameshift_variant
04 Pool	22	04 Pool_22 plate_04 well	NO08G00950	GGATCAAAGAGAGACCAACG	Sulfate permease family;Sulfate permease family;Sulfate permease family	chr8: 306483	T	TT,TG	AO=2,1	DP=182	frameshift_variant
04 Pool	22	04 Pool_22 plate_05 well	NO01G04050	TTTTGGCGTTCACATCCACG	Cellulase 2	chr1: 1082099	TG	T	AO=4	DP=193	frameshift_variant
04 Pool	22	04 Pool_22 plate_06 well	NO06G01590	ATAGCTGCAAAGCTTGACTG	Phosphoinositol transporter	chr6: 500382	G	GC	AO=1	DP=103	frameshift_variant
04 Pool	22	04 Pool_22 plate_06 well	NO09G00120	AGGAGAAATCTTTACCCTGG	Uv excision repair protein rad23;Uv excision repair protein rad23;Uv excision repair protein rad23	chr9: 75970	C	CA	AO=7	DP=172	frameshift_variant
04 Pool	22	04 Pool_22 plate_08 well	NO09G00120	AGGAGAAATCTTTACCCTGG	Uv excision repair protein rad23;Uv excision repair protein rad23;Uv excision repair protein rad23	chr9: 75970	C	CA	AO=7	DP=172	frameshift_variant
04 Pool	22	04 Pool_22 plate_10 well	NO08G00950	GGATCAAAGAGAGACCAACG	Sulfate permease family;Sulfate permease family;Sulfate permease family	chr8: 306483	T	TT,TG	AO=2,1	DP=182	frameshift_variant
04 Pool	22	04 Pool_22 plate_11 well	NO09G02020	TCGACCGCTGGAGATCCACG	Kinesin-like protein	chr9: 620696	GG	CGG,GT	AO=5,1	DP=190	frameshift_variant
04 Pool	22	04 Pool_22 plate_11 well	NO09G00120	AGGAGAAATCTTTACCCTGG	Uv excision repair protein rad23;Uv excision repair protein rad23;Uv excision repair protein rad23	chr9: 75970	C	CA	AO=7	DP=172	frameshift_variant
04 Pool	22	04 Pool_22 plate_15 well	NO08G00950	GGATCAAAGAGAGACCAACG	Sulfate permease family;Sulfate permease family;Sulfate permease family	chr8: 306483	T	TT,TG	AO=2,1	DP=182	frameshift_variant
04 Pool	22	04 Pool_22 plate_16 well	NO09G00120	AGGAGAAATCTTTACCCTGG	Uv excision repair protein rad23;Uv excision repair protein rad23;Uv excision repair protein rad23	chr9: 75970	C	CA	AO=7	DP=172	frameshift_variant
04 Pool	22	04 Pool_22 plate_18 well	NO09G00120	AGGAGAAATCTTTACCCTGG	Uv excision repair protein rad23;Uv excision repair protein rad23;Uv excision repair protein rad23	chr9: 75970	C	CA	AO=7	DP=172	frameshift_variant
04 Pool	22	04 Pool_22 plate_18 well	NO08G00950	GGATCAAAGAGAGACCAACG	Sulfate permease family;Sulfate permease family;Sulfate permease family	chr8: 306483	T	TT,TG	AO=2,1	DP=182	frameshift_variant
04 Pool	22	04 Pool_22 plate_19 well	NO09G00120	AGGAGAAATCTTTACCCTGG	Uv excision repair protein rad23;Uv excision repair protein rad23;Uv excision repair protein rad23	chr9: 75970	C	CA	AO=7	DP=172	frameshift_variant
04 Pool	22	04 Pool_22 plate_20 well	NO27G00040	CGCAACCAGTCCACCCACCG	Amine oxidase	chr27: 14200	A	AG	AO=9	DP=213	frameshift_variant
04 Pool	22	04 Pool_22 plate_20 well	NO08G00950	GGATCAAAGAGAGACCAACG	Sulfate permease family;Sulfate permease family;Sulfate permease family	chr8: 306483	T	TT,TG	AO=2,1	DP=182	frameshift_variant
04 Pool	22	04 Pool_22 plate_21 well	NO08G00950	GGATCAAAGAGAGACCAACG	Sulfate permease family;Sulfate permease family;Sulfate permease family	chr8: 306483	T	TT,TG	AO=2,1	DP=182	frameshift_variant
04 Pool	22	04 Pool_22 plate_22 well	NO08G00950	GGATCAAAGAGAGACCAACG	Sulfate permease family;Sulfate permease family;Sulfate permease family	chr8: 306483	T	TT,TG	AO=2,1	DP=182	frameshift_variant
04 Pool	22	04 Pool_22 plate_22 well	NO21G02640	GATTTCACCCACGAACAAGG	Unknown protein	chr21: 812229	C	CT	AO=1	DP=137	frameshift_variant
04 Pool	22	04 Pool_22 plate_23 well	NO08G00950	GGATCAAAGAGAGACCAACG	Sulfate permease family;Sulfate permease family;Sulfate permease family	chr8: 306483	T	TT,TG	AO=2,1	DP=182	frameshift_variant
04 Pool	22	04 Pool_22 plate_23 well	NO09G00120	AGGAGAAATCTTTACCCTGG	Uv excision repair protein rad23;Uv excision repair protein rad23;Uv excision repair protein rad23	chr9: 75970	C	CA	AO=7	DP=172	frameshift_variant
04 Pool	22	04 Pool_22 plate_24 well	NO20G02240	GCTTCAACGAGAGGAAACGA	Unknown protein	chr20: 679995	CCTCGTTTCCT	C,CCTCGTTTTCCT	AO=1,1	DP=116	frameshift_variant
04 Pool	23	04 Pool_23 plate_02 well	NO05G03610	TCATTTGATGCACAAGACGA	Dihydrolipoamide acetyltransferase component of pyruvate dehydrogenase complex	chr5: 953617	CAAGACG	C,CAAG	AO=2,2	DP=116	disruptive_inframe_deletion
04 Pool	23	04 Pool_23 plate_03 well	NO02G04080	TGAATGGTATGGGACCTACG	Methyltransferase-like protein 13 isoform 1	chr2: 1111244	T	TA	AO=3	DP=129	frameshift_variant&stop_gained
04 Pool	23	04 Pool_23 plate_04 well	NO03G05580	AGGGAACGCCTATACCAGTG	Cation-transporting atpase	chr3: 1601127	TATACC	T,TATACCA	AO=7,2	DP=132	frameshift_variant
04 Pool	23	04 Pool_23 plate_05 well	NO17G01750	TTGCATGTGGATGTCTGACA	Ribosomal rna processing protein 1	chr17: 508024	TCTG	T	AO=1	DP=153	disruptive_inframe_deletion
04 Pool	23	04 Pool_23 plate_08 well	NO01G04980	GCGCAGAACCAGGTGCAATG	Ribosomal protein s27a	chr1: 1322481	CAATG	CAAAAATC,CAAAAATG,TAATG	AO=1,7,1	DP=176	missense_variant&conservative_inframe_insertion
04 Pool	23	04 Pool_23 plate_08 well	NO22G01930	AGAGCTTCGACTTGTCTACG	DNA-binding SAP	chr22: 577775	TAG	T	AO=1	DP=133	frameshift_variant
04 Pool	23	04 Pool_23 plate_09 well	NO07G00440	AAATAAGAAAGGCGAATAGG	Integral membrane gpr155-like protein	chr7: 164865	TCCCCCTCCTCCTCCTCCT	CCCTCCTCCTCCTCCT,TCCCCCTCCTCCTCCT,TCCCCCTCCTCCTCCTCCTA	AO=1,2,3	DP=96	frameshift_variant&stop_gained
04 Pool	23	04 Pool_23 plate_11 well	NO16G00460	TCTGGAAGGTATGTCGCCAG	Unknown protein	chr16: 166102	GCGACA	CGACA,GACA,G	AO=1,1,1	DP=156	frameshift_variant
04 Pool	23	04 Pool_23 plate_12 well	NO22G01930	AGAGCTTCGACTTGTCTACG	DNA-binding SAP	chr22: 577775	TAG	T	AO=1	DP=133	frameshift_variant
04 Pool	23	04 Pool_23 plate_13 well	NO09G01300	GGGGAAATGAGACAGCACAT	SEC-C motif-containing protein	chr9: 432415	CAC	CAAA,C	AO=1,7	DP=164	frameshift_variant&missense_variant
04 Pool	23	04 Pool_23 plate_14 well	NO17G02300	TTGTTCATAGATCAAGCACA	Unknown protein	chr17: 672975	GCA	G	AO=1	DP=114	frameshift_variant
04 Pool	23	04 Pool_23 plate_17 well	NO03G02160	TGCAACGAATTAGGAGACGA	Protein nlrc3	chr3: 643715	G	GA	AO=4	DP=176	frameshift_variant
04 Pool	23	04 Pool_23 plate_18 well	NO17G02680	CGTGATTCTCAAGGACCCAG	Splicing factor 3A subunit 3	chr17: 783535	TG	T	AO=2	DP=146	frameshift_variant
04 Pool	23	04 Pool_23 plate_20 well	NO17G02680	CGTGATTCTCAAGGACCCAG	Splicing factor 3A subunit 3	chr17: 783535	TG	T	AO=2	DP=146	frameshift_variant
04 Pool	24	04 Pool_24 plate_01 well	NO30G00490	GGCCACGTACAAGACACAGA	nucleic acid binding;RNA binding;nucleic acid binding;RNA binding	chr30: 199837	TGT	T,TG,TAGT	AO=1,1,1	DP=206	frameshift_variant
04 Pool	24	04 Pool_24 plate_06 well	NO20G00370	CACCAGTCTTGGCACCCCAG	Unknown protein	chr20: 126714	AC	A	AO=1	DP=200	frameshift_variant
04 Pool	24	04 Pool_24 plate_08 well	NO14G01010	ACCCGGCTTCTTCTTGACAT	Unknown protein	chr14: 338541	AGGACCCGGCTTCTTCTTGACATA	AGGACCC,A	AO=1,1	DP=129	frameshift_variant
04 Pool	24	04 Pool_24 plate_09 well	NO23G00980	AAAGGGAAGTCAAAGCCGAG	Serine threonine-protein phosphatase 5	chr23: 369637	G	GC	AO=6	DP=115	frameshift_variant
04 Pool	24	04 Pool_24 plate_14 well	NO14G00830	GACTGGGTCAATCTACTAAG	Unknown protein	chr14: 294266	TACT	T,TACTC	AO=4,1	DP=145	frameshift_variant
04 Pool	24	04 Pool_24 plate_16 well	NO18G01500	TGAAGGATAGTGCTGCCGAG	Unknown protein	chr18: 493017	GC	G	AO=1	DP=223	frameshift_variant
04 Pool	24	04 Pool_24 plate_18 well	NO20G00370	CACCAGTCTTGGCACCCCAG	Unknown protein	chr20: 126714	AC	A	AO=1	DP=200	frameshift_variant
04 Pool	24	04 Pool_24 plate_19 well	NO01G00250	ACACGATAGTCAAGACGCTG	Unknown protein	chr1: 43674	C	CG	AO=7	DP=169	frameshift_variant
04 Pool	24	04 Pool_24 plate_21 well	NO14G01010	ACCCGGCTTCTTCTTGACAT	Unknown protein	chr14: 338541	AGGACCCGGCTTCTTCTTGACATA	AGGACCC,A	AO=1,1	DP=129	frameshift_variant
04 Pool	24	04 Pool_24 plate_22 well	NO11G03250	CGGGCCAGCACGGTACACGA	DCC family protein At1g52590, chloroplastic	chr11: 1010168	C	CA	AO=9	DP=179	frameshift_variant
04 Pool	24	04 Pool_24 plate_23 well	NO16G02050	ACATTGGTTTCGGAGCATGG	START-like domain protein	chr16: 603367	TG	ATG,TTG,CCACTG,TA	AO=2,1,4,1	DP=160	frameshift_variant
05 Pool	01	05 Pool_01 plate_01 well	NO18G00980	ACCCAGGATCAGGCACAAGG	Unknown protein	chr18: 354398	CTCCTTGTGCCTGA	C,CTCCTCTGTGCCTGA,CTCCTTGTGTGCCTGA	AO=4,1,4	DP=178	frameshift_variant
05 Pool	01	05 Pool_01 plate_02 well	NO11G01130	TGTATGGCAAGGATTTCGCA	Unknown protein	chr11: 410450	GGATTTCGCAGGGAAGGA	GGGGCAGGGAAGGA,G	AO=2,1	DP=180	frameshift_variant&missense_variant
05 Pool	01	05 Pool_01 plate_05 well	NO25G01550	AAATCCACAGCGGAACAGTG	Unknown protein	chr25: 440836	C	CT	AO=2	DP=204	frameshift_variant
05 Pool	01	05 Pool_01 plate_07 well	NO10G01080	TTCAGGAGTACATTCGACCG	Unknown protein	chr10: 327363	TCGAC	T	AO=1	DP=128	frameshift_variant
05 Pool	01	05 Pool_01 plate_08 well	NO14G01020	CATGCACAAGATAGACCAGG	Vasohibin-1	chr14: 339118	C	CC,CT	AO=1,4	DP=213	frameshift_variant
05 Pool	01	05 Pool_01 plate_08 well	NO27G00130	CGGGTACCTGCACGGCAAGG	Unknown protein	chr27: 43191	C	CT	AO=2	DP=197	frameshift_variant
05 Pool	01	05 Pool_01 plate_09 well	NO02G00560	CTGGTACCACATCAGCAACG	Thymidylate synthase;Thymidylate synthase;Thymidylate synthase	chr2: 195030	GC	TGC,GT	AO=1,1	DP=195	frameshift_variant
05 Pool	01	05 Pool_01 plate_10 well	NO18G00980	ACCCAGGATCAGGCACAAGG	Unknown protein	chr18: 354398	CTCCTTGTGCCTGA	C,CTCCTCTGTGCCTGA,CTCCTTGTGTGCCTGA	AO=4,1,4	DP=178	frameshift_variant
05 Pool	01	05 Pool_01 plate_12 well	NO04G03270	GTTCCCTGGAGGTTGTACGG	Unknown protein	chr4: 907796	CACAAGCCCCCGT	CACAAGCCCCCG,C	AO=3,2	DP=182	frameshift_variant
05 Pool	01	05 Pool_01 plate_17 well	NO11G00680	TGCGACAACAGCGACCGTCA	Lipase family protein	chr11: 288818	G	GT,GAT	AO=10,1	DP=188	frameshift_variant
05 Pool	01	05 Pool_01 plate_18 well	NO08G00490	GATTGGACCAGGGTACCTCG	Inhibitor of growth protein	chr8: 189313	A	AC	AO=1	DP=183	frameshift_variant
05 Pool	01	05 Pool_01 plate_20 well	NO06G02260	GCTGAAGGACGCAATCCAGG	Meiotic recombination protein spo11 isoform 2;Meiotic recombination protein spo11 isoform 2	chr6: 658913	GCCTGGATTGCGT	G,GCCGGATTGCGT,GCCTTTGCGT,GCCTGGGATTGCGT,GCCCGGATTGCGT	AO=1,1,1,1,1	DP=166	frameshift_variant
05 Pool	01	05 Pool_01 plate_22 well	NO14G01740	CATGGTCTACAAATCCCACG	Unknown protein	chr14: 537735	G	T	AO=2	DP=239	missense_variant
05 Pool	02	05 Pool_02 plate_02 well	NO20G00600	GAAGTCCGAGAAGAATAGCG	Six-bladed beta-propeller, TolB	chr20: 206060	CCTCGCTATTCTT	C,CCTTATTCTT,CCTCGCTCTT,CCTCGCTTTTATTCTT	AO=2,1,4,2	DP=208	conservative_inframe_insertion
05 Pool	02	05 Pool_02 plate_03 well	NO21G01890	ATACGAAAAGCACTCCAACG	Pap fibrillin family protein;Pap fibrillin family protein	chr21: 562921	G	GT,GTT	AO=5,1	DP=223	frameshift_variant
05 Pool	02	05 Pool_02 plate_04 well	NO08G00770	GTATAAATCCGAAATCCAGG	Phosphatidylinositol 3-kinase vps34	chr8: 254219	CCAG	CAG,C,CCG,CC	AO=1,3,1,1	DP=129	frameshift_variant
05 Pool	02	05 Pool_02 plate_05 well	NO20G00600	GAAGTCCGAGAAGAATAGCG	Six-bladed beta-propeller, TolB	chr20: 206060	CCTCGCTATTCTT	C,CCTTATTCTT,CCTCGCTCTT,CCTCGCTTTTATTCTT	AO=2,1,4,2	DP=208	conservative_inframe_insertion
05 Pool	02	05 Pool_02 plate_06 well	NO02G05200	GATATGGAATTCTTCGAGAG	Unknown protein	chr2: 1392662	GCT	G	AO=3	DP=214	frameshift_variant
05 Pool	02	05 Pool_02 plate_07 well	NO05G02740	CGGGCCTCACCCATACAACA	Unknown protein;Unknown protein	chr5: 722586	CTTG	C	AO=12	DP=236	disruptive_inframe_deletion
05 Pool	02	05 Pool_02 plate_09 well	NO20G01420	AAGGAGACCAGATACGATGG	Potassium sodium efflux p-type atpase	chr20: 430922	ATCGTATCT	TCGTATCT,ACGTATCT,A,AATCGTATCT,ACTCGTATCT,ATTCGTATCT	AO=1,1,1,1,2,1	DP=232	frameshift_variant
05 Pool	02	05 Pool_02 plate_10 well	NO25G01210	GCCGCCTACAGATAACTCGG	Unknown protein	chr25: 339059	G	AG,TG,A	AO=3,1,1	DP=183	frameshift_variant
05 Pool	02	05 Pool_02 plate_11 well	NO05G04110	AGTATGACGAAGCTATCACA	Heat shock protein 70	chr5: 1056863	T	C	AO=3	DP=166	missense_variant
05 Pool	02	05 Pool_02 plate_13 well	NO15G01840	GATATCAAGACGTTCCAACA	UDENN	chr15: 523910	T	TT,TG,TTG	AO=2,2,1	DP=204	frameshift_variant
05 Pool	02	05 Pool_02 plate_14 well	NO01G01260	CTTGCAATGCCTCCCCTCGG	Unknown protein	chr1: 327965	CT	T,CTA	AO=1,5	DP=204	frameshift_variant
05 Pool	02	05 Pool_02 plate_15 well	NO26G01340	ATGAACATGAAAGAAGCTTG	Folate-binding protein	chr26: 432035	A	AG	AO=2	DP=253	frameshift_variant
05 Pool	02	05 Pool_02 plate_17 well	NO03G00470	ACCACAGCACAACCAGAAAG	Unknown protein	chr3: 147473	T	TT,TTA	AO=1,1	DP=151	frameshift_variant
05 Pool	02	05 Pool_02 plate_19 well	NO04G00840	TGGCTGGTAAGTTCGCGGAG	Low PSII Accumulation 3	chr4: 280447	CG	C	AO=7	DP=243	frameshift_variant
05 Pool	02	05 Pool_02 plate_21 well	NO05G04740	GGGCGGGATTCAGGAAACGA	NEDD4-binding protein 2-like 2	chr5: 1232876	G	GTTT	AO=1	DP=122	disruptive_inframe_insertion
05 Pool	02	05 Pool_02 plate_24 well	NO19G00350	TCCGTGGTCAAGACGCGTGG	Unknown protein	chr19: 144432	C	CG	AO=1	DP=228	frameshift_variant
05 Pool	03	05 Pool_03 plate_02 well	NO14G01160	AGAAAGGAGGATCAACATCG	Autophagy protein	chr14: 381974	TCAA	T	AO=1	DP=136	disruptive_inframe_deletion
05 Pool	03	05 Pool_03 plate_03 well	NO09G00820	GGCGGAACTGAAACTCTCCG	Dna-damage-inducible protein f	chr9: 287959	ACT	A	AO=2	DP=188	frameshift_variant
05 Pool	03	05 Pool_03 plate_03 well	NO23G01270	TGTAGGATCCCTGACCATGG	Unknown protein	chr23: 454695	CCTGACCATGGCGGCGCT	GCG,GCT,CCT	AO=1,3,2	DP=147	missense_variant&conservative_inframe_deletion
05 Pool	03	05 Pool_03 plate_06 well	NO01G01230	AGCATTGTGAACAAACCGAG	Unknown protein	chr1: 318522	CG	C,CGG	AO=9,3	DP=138	frameshift_variant
05 Pool	03	05 Pool_03 plate_11 well	NO07G04090	TGTGCCCAACGACATTCTGG	Beta-mannosidase;Mannosidase	chr7: 1140111	TTC	T	AO=1	DP=38	frameshift_variant
05 Pool	03	05 Pool_03 plate_12 well	NO23G01270	TGTAGGATCCCTGACCATGG	Unknown protein	chr23: 454695	CCTGACCATGGCGGCGCT	GCG,GCT,CCT	AO=1,3,2	DP=147	missense_variant&conservative_inframe_deletion
05 Pool	03	05 Pool_03 plate_13 well	NO03G04100	TCCATCCCATCGTCATAACG	SET domain protein 14	chr3: 1190315	TTATGA	T	AO=5	DP=144	frameshift_variant
05 Pool	03	05 Pool_03 plate_15 well	NO03G01670	ACTGGCTATTGACATATGAG	Growth hormone-regulated tbc protein 1	chr3: 528878	CAT	C	AO=1	DP=171	frameshift_variant
05 Pool	03	05 Pool_03 plate_16 well	NO26G00240	GTTAATTTGGTCTGACGATG	Acyl-coenzyme A oxidase	chr26: 85692	ATCG	A	AO=1	DP=140	disruptive_inframe_deletion
05 Pool	03	05 Pool_03 plate_20 well	NO13G02680	AAGAGCGCTCTATTTTCCGG	Wsc domain-containing protein	chr13: 739163	CG	C	AO=1	DP=147	frameshift_variant
05 Pool	03	05 Pool_03 plate_22 well	NO01G03450	TCTAGCAGTAATACACCCGG	Transmembrane transporter protein, chloroquine resistant	chr1: 901587	CG	C	AO=3	DP=179	frameshift_variant
05 Pool	04	05 Pool_04 plate_01 well	NO02G04860	CAAGGTACACACAACTACGG	transferases, transferring acyl groups other than amino-acyl groups;acyltransferases;transferases, transferring acyl groups other than amino-acyl groups;acyltransferases;transferases, transferring acyl groups other than amino-acyl groups;acyltransferases;Esterase/lipase/thioesterase family protein	chr2: 1314406	CGTA	C,CGA,CGGTA,CGCTA,CGTTA	AO=1,3,6,6,1	DP=153	frameshift_variant
05 Pool	04	05 Pool_04 plate_01 well	NO18G00340	GACATGCGCAAAAAGAGTGG	Peptidylprolyl isomerase;Peptidylprolyl isomerase	chr18: 144436	G	GG,GC,GT	AO=1,1,1	DP=164	frameshift_variant
05 Pool	04	05 Pool_04 plate_02 well	NO09G01150	CGATGGAGGACAATTACCAA	Unknown protein	chr9: 371356	GGTA	G	AO=1	DP=151	disruptive_inframe_deletion
05 Pool	04	05 Pool_04 plate_02 well	NO02G04860	CAAGGTACACACAACTACGG	transferases, transferring acyl groups other than amino-acyl groups;acyltransferases;transferases, transferring acyl groups other than amino-acyl groups;acyltransferases;transferases, transferring acyl groups other than amino-acyl groups;acyltransferases;Esterase/lipase/thioesterase family protein	chr2: 1314406	CGTA	C,CGA,CGGTA,CGCTA,CGTTA	AO=1,3,6,6,1	DP=153	frameshift_variant
05 Pool	04	05 Pool_04 plate_03 well	NO02G04860	CAAGGTACACACAACTACGG	transferases, transferring acyl groups other than amino-acyl groups;acyltransferases;transferases, transferring acyl groups other than amino-acyl groups;acyltransferases;transferases, transferring acyl groups other than amino-acyl groups;acyltransferases;Esterase/lipase/thioesterase family protein	chr2: 1314406	CGTA	C,CGA,CGGTA,CGCTA,CGTTA	AO=1,3,6,6,1	DP=153	frameshift_variant
05 Pool	04	05 Pool_04 plate_04 well	NO02G04860	CAAGGTACACACAACTACGG	transferases, transferring acyl groups other than amino-acyl groups;acyltransferases;transferases, transferring acyl groups other than amino-acyl groups;acyltransferases;transferases, transferring acyl groups other than amino-acyl groups;acyltransferases;Esterase/lipase/thioesterase family protein	chr2: 1314406	CGTA	C,CGA,CGGTA,CGCTA,CGTTA	AO=1,3,6,6,1	DP=153	frameshift_variant
05 Pool	04	05 Pool_04 plate_04 well	NO07G00690	ATGCTTCGGCAAATTCACGC	Unknown protein	chr7: 247884	TCA	T,TCAC,TCACC,TCC	AO=4,3,1,1	DP=184	frameshift_variant
05 Pool	04	05 Pool_04 plate_05 well	NO02G04860	CAAGGTACACACAACTACGG	transferases, transferring acyl groups other than amino-acyl groups;acyltransferases;transferases, transferring acyl groups other than amino-acyl groups;acyltransferases;transferases, transferring acyl groups other than amino-acyl groups;acyltransferases;Esterase/lipase/thioesterase family protein	chr2: 1314406	CGTA	C,CGA,CGGTA,CGCTA,CGTTA	AO=1,3,6,6,1	DP=153	frameshift_variant
05 Pool	04	05 Pool_04 plate_06 well	NO11G01670	TATCCCAAGCCGTCTCCATG	Monoglyceride lipase	chr11: 551385	AG	GAG,AT	AO=4,1	DP=163	frameshift_variant
05 Pool	04	05 Pool_04 plate_07 well	NO29G00690	TGTGGTTACAGAGGAGCACG	ATP-dependent chaperone ClpB;ATP-dependent chaperone ClpB	chr29: 264178	C	GA	AO=13	DP=222	frameshift_variant&missense_variant
05 Pool	04	05 Pool_04 plate_07 well	NO02G04860	CAAGGTACACACAACTACGG	transferases, transferring acyl groups other than amino-acyl groups;acyltransferases;transferases, transferring acyl groups other than amino-acyl groups;acyltransferases;transferases, transferring acyl groups other than amino-acyl groups;acyltransferases;Esterase/lipase/thioesterase family protein	chr2: 1314406	CGTA	C,CGA,CGGTA,CGCTA,CGTTA	AO=1,3,6,6,1	DP=153	frameshift_variant
05 Pool	04	05 Pool_04 plate_08 well	NO21G00820	CGGGAAGTAAGGTTCTCGGG	Ion transport 2;Unknown protein	chr21: 278299	CGA	C	AO=1	DP=124	frameshift_variant
05 Pool	04	05 Pool_04 plate_08 well	NO02G04860	CAAGGTACACACAACTACGG	transferases, transferring acyl groups other than amino-acyl groups;acyltransferases;transferases, transferring acyl groups other than amino-acyl groups;acyltransferases;transferases, transferring acyl groups other than amino-acyl groups;acyltransferases;Esterase/lipase/thioesterase family protein	chr2: 1314406	CGTA	C,CGA,CGGTA,CGCTA,CGTTA	AO=1,3,6,6,1	DP=153	frameshift_variant
05 Pool	04	05 Pool_04 plate_09 well	NO02G04860	CAAGGTACACACAACTACGG	transferases, transferring acyl groups other than amino-acyl groups;acyltransferases;transferases, transferring acyl groups other than amino-acyl groups;acyltransferases;transferases, transferring acyl groups other than amino-acyl groups;acyltransferases;Esterase/lipase/thioesterase family protein	chr2: 1314406	CGTA	C,CGA,CGGTA,CGCTA,CGTTA	AO=1,3,6,6,1	DP=153	frameshift_variant
05 Pool	04	05 Pool_04 plate_10 well	NO06G03000	GGTTATTGGACAAATGCCAG	Unknown protein	chr6: 857748	TG	T	AO=1	DP=152	frameshift_variant
05 Pool	04	05 Pool_04 plate_10 well	NO02G04860	CAAGGTACACACAACTACGG	transferases, transferring acyl groups other than amino-acyl groups;acyltransferases;transferases, transferring acyl groups other than amino-acyl groups;acyltransferases;transferases, transferring acyl groups other than amino-acyl groups;acyltransferases;Esterase/lipase/thioesterase family protein	chr2: 1314406	CGTA	C,CGA,CGGTA,CGCTA,CGTTA	AO=1,3,6,6,1	DP=153	frameshift_variant
05 Pool	04	05 Pool_04 plate_11 well	NO24G00010	ATAGACCGAGCAGTAGCGGG	Acid phosphatase 5a	chr24: 1461	CCG	C	AO=1	DP=189	frameshift_variant
05 Pool	04	05 Pool_04 plate_11 well	NO02G04860	CAAGGTACACACAACTACGG	transferases, transferring acyl groups other than amino-acyl groups;acyltransferases;transferases, transferring acyl groups other than amino-acyl groups;acyltransferases;transferases, transferring acyl groups other than amino-acyl groups;acyltransferases;Esterase/lipase/thioesterase family protein	chr2: 1314406	CGTA	C,CGA,CGGTA,CGCTA,CGTTA	AO=1,3,6,6,1	DP=153	frameshift_variant
05 Pool	04	05 Pool_04 plate_12 well	NO02G04860	CAAGGTACACACAACTACGG	transferases, transferring acyl groups other than amino-acyl groups;acyltransferases;transferases, transferring acyl groups other than amino-acyl groups;acyltransferases;transferases, transferring acyl groups other than amino-acyl groups;acyltransferases;Esterase/lipase/thioesterase family protein	chr2: 1314406	CGTA	C,CGA,CGGTA,CGCTA,CGTTA	AO=1,3,6,6,1	DP=153	frameshift_variant
05 Pool	04	05 Pool_04 plate_13 well	NO13G00150	TCCTTCTCTCACTACCAACG	CWF19-like protein 2	chr13: 62040	CA	C	AO=2	DP=59	frameshift_variant
05 Pool	04	05 Pool_04 plate_13 well	NO02G04860	CAAGGTACACACAACTACGG	transferases, transferring acyl groups other than amino-acyl groups;acyltransferases;transferases, transferring acyl groups other than amino-acyl groups;acyltransferases;transferases, transferring acyl groups other than amino-acyl groups;acyltransferases;Esterase/lipase/thioesterase family protein	chr2: 1314406	CGTA	C,CGA,CGGTA,CGCTA,CGTTA	AO=1,3,6,6,1	DP=153	frameshift_variant
05 Pool	04	05 Pool_04 plate_14 well	NO02G04860	CAAGGTACACACAACTACGG	transferases, transferring acyl groups other than amino-acyl groups;acyltransferases;transferases, transferring acyl groups other than amino-acyl groups;acyltransferases;transferases, transferring acyl groups other than amino-acyl groups;acyltransferases;Esterase/lipase/thioesterase family protein	chr2: 1314406	CGTA	C,CGA,CGGTA,CGCTA,CGTTA	AO=1,3,6,6,1	DP=153	frameshift_variant
05 Pool	04	05 Pool_04 plate_15 well	NO02G04860	CAAGGTACACACAACTACGG	transferases, transferring acyl groups other than amino-acyl groups;acyltransferases;transferases, transferring acyl groups other than amino-acyl groups;acyltransferases;transferases, transferring acyl groups other than amino-acyl groups;acyltransferases;Esterase/lipase/thioesterase family protein	chr2: 1314406	CGTA	C,CGA,CGGTA,CGCTA,CGTTA	AO=1,3,6,6,1	DP=153	frameshift_variant
05 Pool	04	05 Pool_04 plate_16 well	NO02G04860	CAAGGTACACACAACTACGG	transferases, transferring acyl groups other than amino-acyl groups;acyltransferases;transferases, transferring acyl groups other than amino-acyl groups;acyltransferases;transferases, transferring acyl groups other than amino-acyl groups;acyltransferases;Esterase/lipase/thioesterase family protein	chr2: 1314406	CGTA	C,CGA,CGGTA,CGCTA,CGTTA	AO=1,3,6,6,1	DP=153	frameshift_variant
05 Pool	04	05 Pool_04 plate_17 well	NO02G03490	AATAACGCCCAACATGTATG	Unknown protein	chr2: 936916	ATG	A	AO=5	DP=108	frameshift_variant
05 Pool	04	05 Pool_04 plate_17 well	NO02G04860	CAAGGTACACACAACTACGG	transferases, transferring acyl groups other than amino-acyl groups;acyltransferases;transferases, transferring acyl groups other than amino-acyl groups;acyltransferases;transferases, transferring acyl groups other than amino-acyl groups;acyltransferases;Esterase/lipase/thioesterase family protein	chr2: 1314406	CGTA	C,CGA,CGGTA,CGCTA,CGTTA	AO=1,3,6,6,1	DP=153	frameshift_variant
05 Pool	04	05 Pool_04 plate_18 well	NO02G04860	CAAGGTACACACAACTACGG	transferases, transferring acyl groups other than amino-acyl groups;acyltransferases;transferases, transferring acyl groups other than amino-acyl groups;acyltransferases;transferases, transferring acyl groups other than amino-acyl groups;acyltransferases;Esterase/lipase/thioesterase family protein	chr2: 1314406	CGTA	C,CGA,CGGTA,CGCTA,CGTTA	AO=1,3,6,6,1	DP=153	frameshift_variant
05 Pool	04	05 Pool_04 plate_19 well	NO07G00810	ACAACAAGGATAATGCATCA	Unknown protein	chr7: 274643	AATGCATCAAGG	A,AATGCAATCAAGG,AATGCAGTCAAGG	AO=1,1,3	DP=140	frameshift_variant
05 Pool	04	05 Pool_04 plate_19 well	NO02G04860	CAAGGTACACACAACTACGG	transferases, transferring acyl groups other than amino-acyl groups;acyltransferases;transferases, transferring acyl groups other than amino-acyl groups;acyltransferases;transferases, transferring acyl groups other than amino-acyl groups;acyltransferases;Esterase/lipase/thioesterase family protein	chr2: 1314406	CGTA	C,CGA,CGGTA,CGCTA,CGTTA	AO=1,3,6,6,1	DP=153	frameshift_variant
05 Pool	04	05 Pool_04 plate_20 well	NO02G04860	CAAGGTACACACAACTACGG	transferases, transferring acyl groups other than amino-acyl groups;acyltransferases;transferases, transferring acyl groups other than amino-acyl groups;acyltransferases;transferases, transferring acyl groups other than amino-acyl groups;acyltransferases;Esterase/lipase/thioesterase family protein	chr2: 1314406	CGTA	C,CGA,CGGTA,CGCTA,CGTTA	AO=1,3,6,6,1	DP=153	frameshift_variant
05 Pool	04	05 Pool_04 plate_21 well	NO02G04860	CAAGGTACACACAACTACGG	transferases, transferring acyl groups other than amino-acyl groups;acyltransferases;transferases, transferring acyl groups other than amino-acyl groups;acyltransferases;transferases, transferring acyl groups other than amino-acyl groups;acyltransferases;Esterase/lipase/thioesterase family protein	chr2: 1314406	CGTA	C,CGA,CGGTA,CGCTA,CGTTA	AO=1,3,6,6,1	DP=153	frameshift_variant
05 Pool	04	05 Pool_04 plate_22 well	NO02G04860	CAAGGTACACACAACTACGG	transferases, transferring acyl groups other than amino-acyl groups;acyltransferases;transferases, transferring acyl groups other than amino-acyl groups;acyltransferases;transferases, transferring acyl groups other than amino-acyl groups;acyltransferases;Esterase/lipase/thioesterase family protein	chr2: 1314406	CGTA	C,CGA,CGGTA,CGCTA,CGTTA	AO=1,3,6,6,1	DP=153	frameshift_variant
05 Pool	04	05 Pool_04 plate_23 well	NO02G04860	CAAGGTACACACAACTACGG	transferases, transferring acyl groups other than amino-acyl groups;acyltransferases;transferases, transferring acyl groups other than amino-acyl groups;acyltransferases;transferases, transferring acyl groups other than amino-acyl groups;acyltransferases;Esterase/lipase/thioesterase family protein	chr2: 1314406	CGTA	C,CGA,CGGTA,CGCTA,CGTTA	AO=1,3,6,6,1	DP=153	frameshift_variant
05 Pool	04	05 Pool_04 plate_24 well	NO13G02380	CATAGTAAAAGATGTAGTCA	Unknown protein	chr13: 660893	AGATGTAGTCACG	A,AGATGTAGTTCACG	AO=1,1	DP=164	frameshift_variant
05 Pool	04	05 Pool_04 plate_24 well	NO02G04860	CAAGGTACACACAACTACGG	transferases, transferring acyl groups other than amino-acyl groups;acyltransferases;transferases, transferring acyl groups other than amino-acyl groups;acyltransferases;transferases, transferring acyl groups other than amino-acyl groups;acyltransferases;Esterase/lipase/thioesterase family protein	chr2: 1314406	CGTA	C,CGA,CGGTA,CGCTA,CGTTA	AO=1,3,6,6,1	DP=153	frameshift_variant
05 Pool	05	05 Pool_05 plate_01 well	NO07G00680	CACAATGTTATCATTGCCCG	FAD dependent oxidoreductase;FAD dependent oxidoreductase	chr7: 247026	GC	G	AO=2	DP=162	frameshift_variant
05 Pool	05	05 Pool_05 plate_04 well	NO05G01990	GTATGTTCCGGAGCTCCGTG	Unknown protein	chr5: 542162	TC	T	AO=9	DP=140	frameshift_variant
05 Pool	05	05 Pool_05 plate_05 well	NO25G00610	CAAGGGGAAAGGGTATACGA	BRO1 domain protein;BRO1 domain protein	chr25: 173287	T	TA	AO=4	DP=138	frameshift_variant
05 Pool	05	05 Pool_05 plate_05 well	NO12G02980	ACTGTTTTTAGCACACCAGA	Unknown protein	chr12: 821645	AC	A,ACC	AO=10,5	DP=169	frameshift_variant
05 Pool	05	05 Pool_05 plate_07 well	NO25G01090	TGTATATCGTGCAAGCATGG	Molybdenum cofactor sulfurase	chr25: 299114	A	ATT	AO=9	DP=139	frameshift_variant
05 Pool	05	05 Pool_05 plate_08 well	NO11G02240	CATTTACGAGTATGGCAGCG	Cupin, RmlC-type	chr11: 727842	CGCT	C,CGCTT	AO=1,1	DP=163	frameshift_variant
05 Pool	05	05 Pool_05 plate_09 well	NO02G04870	GCATCGGGGGCAAATCCAAG	NADH:ubiquinone oxidoreductase intermediate-associated protein 30	chr2: 1315857	TGGA	TGA,T,TGGGA	AO=3,1,1	DP=144	frameshift_variant
05 Pool	05	05 Pool_05 plate_09 well	NO11G02240	CATTTACGAGTATGGCAGCG	Cupin, RmlC-type	chr11: 727842	CGCT	C,CGCTT	AO=1,1	DP=163	frameshift_variant
05 Pool	05	05 Pool_05 plate_11 well	NO02G00020	ATTCGGGGAAGTCCGCCTCG	Calcium-binding endonuclease exonuclease phosphatase family protein	chr2: 7075	C	CG	AO=8	DP=194	frameshift_variant
05 Pool	05	05 Pool_05 plate_12 well	NO12G02980	ACTGTTTTTAGCACACCAGA	Unknown protein	chr12: 821645	AC	A,ACC	AO=10,5	DP=169	frameshift_variant
05 Pool	05	05 Pool_05 plate_12 well	NO11G02240	CATTTACGAGTATGGCAGCG	Cupin, RmlC-type	chr11: 727842	CGCT	C,CGCTT	AO=1,1	DP=163	frameshift_variant
05 Pool	05	05 Pool_05 plate_13 well	NO24G00250	GGGTGTTACGCAGGGCAGGA	Unknown protein	chr24: 76557	C	CT	AO=6	DP=103	frameshift_variant
05 Pool	05	05 Pool_05 plate_13 well	NO11G02240	CATTTACGAGTATGGCAGCG	Cupin, RmlC-type	chr11: 727842	CGCT	C,CGCTT	AO=1,1	DP=163	frameshift_variant
05 Pool	05	05 Pool_05 plate_14 well	NO24G00230	GTACAAAGTCGAGGCCATCG	DNA-dependent metalloprotease WSS1	chr24: 73453	GTCGAGGCCA	G,GTCGAGGCCAC	AO=1,1	DP=166	frameshift_variant
05 Pool	05	05 Pool_05 plate_14 well	NO11G02240	CATTTACGAGTATGGCAGCG	Cupin, RmlC-type	chr11: 727842	CGCT	C,CGCTT	AO=1,1	DP=163	frameshift_variant
05 Pool	05	05 Pool_05 plate_15 well	NO20G01900	CCAGTCCGCCAATTTACGGG	Unknown protein;Unknown protein	chr20: 571714	TTTACGGGCGGT	CGGGCGGT,TTTAGGGCGGT,TTTACGGCGGT,TTTACGGGCGGG	AO=1,1,1,1	DP=142	frameshift_variant
05 Pool	05	05 Pool_05 plate_16 well	NO11G03530	GGAGGTACAAGGCAGGACAC	Unknown protein	chr11: 1137616	G	GC	AO=7	DP=166	frameshift_variant
05 Pool	05	05 Pool_05 plate_16 well	NO11G02240	CATTTACGAGTATGGCAGCG	Cupin, RmlC-type	chr11: 727842	CGCT	C,CGCTT	AO=1,1	DP=163	frameshift_variant
05 Pool	05	05 Pool_05 plate_17 well	NO15G02020	GTTCTTGATCAGACTCGTCG	Rad54-like protein	chr15: 564072	GA	G	AO=8	DP=102	frameshift_variant
05 Pool	05	05 Pool_05 plate_20 well	NO11G02240	CATTTACGAGTATGGCAGCG	Cupin, RmlC-type	chr11: 727842	CGCT	C,CGCTT	AO=1,1	DP=163	frameshift_variant
05 Pool	05	05 Pool_05 plate_21 well	NO11G02240	CATTTACGAGTATGGCAGCG	Cupin, RmlC-type	chr11: 727842	CGCT	C,CGCTT	AO=1,1	DP=163	frameshift_variant
05 Pool	05	05 Pool_05 plate_22 well	NO11G02240	CATTTACGAGTATGGCAGCG	Cupin, RmlC-type	chr11: 727842	CGCT	C,CGCTT	AO=1,1	DP=163	frameshift_variant
05 Pool	05	05 Pool_05 plate_23 well	NO11G01160	GCTCATCAAGTTCTACAAGG	Ran protein binding protein;Ran protein binding protein	chr11: 419512	CA	C	AO=6	DP=171	frameshift_variant
05 Pool	05	05 Pool_05 plate_23 well	NO11G02240	CATTTACGAGTATGGCAGCG	Cupin, RmlC-type	chr11: 727842	CGCT	C,CGCTT	AO=1,1	DP=163	frameshift_variant
05 Pool	05	05 Pool_05 plate_24 well	NO11G02240	CATTTACGAGTATGGCAGCG	Cupin, RmlC-type	chr11: 727842	CGCT	C,CGCTT	AO=1,1	DP=163	frameshift_variant
05 Pool	06	05 Pool_06 plate_01 well	NO18G01330	AGGTGACCTGTGTCTTCCTG	EEIG1/EHBP1 N-terminal domain protein	chr18: 450486	A	AG	AO=1	DP=182	frameshift_variant
05 Pool	06	05 Pool_06 plate_02 well	NO17G02510	GGGGAAACCATCGTATCACG	Methyltransferase type 11	chr17: 739363	CA	C	AO=1	DP=200	frameshift_variant
05 Pool	06	05 Pool_06 plate_04 well	NO04G01340	ATGCCAGTTGATCCACACCG	Phosphoinositol transporter	chr4: 420409	A	AG	AO=1	DP=154	frameshift_variant
05 Pool	06	05 Pool_06 plate_06 well	NO10G02330	CAATGACCTCCAACGCATCG	Unknown protein	chr10: 640842	A	AT	AO=6	DP=168	frameshift_variant
05 Pool	06	05 Pool_06 plate_08 well	NO06G02010	GAATATGGAAGGAAGCAACG	Protein phosphatase 2C family protein	chr6: 594191	C	CA	AO=1	DP=169	frameshift_variant
05 Pool	06	05 Pool_06 plate_09 well	NO04G01340	ATGCCAGTTGATCCACACCG	Phosphoinositol transporter	chr4: 420409	A	AG	AO=1	DP=154	frameshift_variant
05 Pool	06	05 Pool_06 plate_10 well	NO02G04740	ACCCACACGCCCGACCACAG	Unknown protein	chr2: 1282676	C	CA	AO=11	DP=181	frameshift_variant
05 Pool	06	05 Pool_06 plate_14 well	NO26G01290	CTATCGGAAGGAGACGACGA	Unknown protein	chr26: 417641	GT	G	AO=12	DP=212	frameshift_variant
05 Pool	06	05 Pool_06 plate_15 well	NO04G01340	ATGCCAGTTGATCCACACCG	Phosphoinositol transporter	chr4: 420409	A	AG	AO=1	DP=154	frameshift_variant
05 Pool	06	05 Pool_06 plate_15 well	NO24G01850	GTCAGAGTGCGAGGTCGATG	Unknown protein	chr24: 491837	ATC	A	AO=8	DP=195	frameshift_variant
05 Pool	06	05 Pool_06 plate_17 well	NO07G02370	AAAAGAGAATGAGTTCCAGG	Unknown protein	chr7: 696432	CCTGGAA	C,CCTGAA,CCTGTAA	AO=1,2,1	DP=161	frameshift_variant
05 Pool	06	05 Pool_06 plate_19 well	NO17G01190	AAATGTGCTCAGGATTGCCA	Unknown protein	chr17: 375262	GC	G,GCC	AO=1,1	DP=215	frameshift_variant
05 Pool	06	05 Pool_06 plate_20 well	NO12G00510	GCGGAGGAGGGTATCAACCA	DEAD box helicase	chr12: 182984	C	CA	AO=1	DP=138	frameshift_variant
05 Pool	06	05 Pool_06 plate_21 well	NO02G04460	GGGCAGATAAAGTCATACGT	Methyltransferase type 11	chr2: 1207914	ATACG	A,ATAACG	AO=1,3	DP=207	frameshift_variant
05 Pool	06	05 Pool_06 plate_24 well	NO21G02500	GACAGTCGTCCGTGACAGCG	Alpha beta hydrolase;Alpha beta hydrolase	chr21: 761476	AGCG	A	AO=2	DP=203	disruptive_inframe_deletion
05 Pool	06	05 Pool_06 plate_24 well	NO24G01850	GTCAGAGTGCGAGGTCGATG	Unknown protein	chr24: 491837	ATC	A	AO=8	DP=195	frameshift_variant
05 Pool	07	05 Pool_07 plate_06 well	NO18G01850	CCTATCTATCAGACCCACGA	vacuolar protein sorting 26B;vacuolar protein sorting 26B	chr18: 571841	C	CA	AO=1	DP=147	frameshift_variant
05 Pool	07	05 Pool_07 plate_06 well	NO28G00050	GCGTGGGGAAGAGAAGTCTG	Unknown protein	chr28: 16256	T	G	AO=2	DP=90	synonymous_variant
05 Pool	07	05 Pool_07 plate_08 well	NO28G00050	GCGTGGGGAAGAGAAGTCTG	Unknown protein	chr28: 16256	T	G	AO=2	DP=90	synonymous_variant
05 Pool	07	05 Pool_07 plate_09 well	NO21G02650	GACCGTGACGAAGAGCGGAG	Nucleotide excision repair factor NEF2, RAD4/CUT5 component	chr21: 817601	GAAGAGC	G,GAAGA	AO=1,1	DP=66	frameshift_variant
05 Pool	07	05 Pool_07 plate_10 well	NO28G00050	GCGTGGGGAAGAGAAGTCTG	Unknown protein	chr28: 16256	T	G	AO=2	DP=90	synonymous_variant
05 Pool	07	05 Pool_07 plate_11 well	NO14G00230	GATGGTGTGGAAGCCATCGG	Unknown protein	chr14: 80913	ATG	TG,A,AATG,TATG,AGTG	AO=1,1,2,5,1	DP=169	frameshift_variant
05 Pool	07	05 Pool_07 plate_13 well	NO07G02560	AGCTCTAGTAGACAACACCG	Cral-trio family protein	chr7: 744663	ACACCG	ACATCCA,CCG,ACAACCG,ACAAACCG,ACAGCCG,ACTCCG	AO=1,1,1,2,1,1	DP=209	frameshift_variant
05 Pool	07	05 Pool_07 plate_13 well	NO28G00050	GCGTGGGGAAGAGAAGTCTG	Unknown protein	chr28: 16256	T	G	AO=2	DP=90	synonymous_variant
05 Pool	07	05 Pool_07 plate_15 well	NO28G00050	GCGTGGGGAAGAGAAGTCTG	Unknown protein	chr28: 16256	T	G	AO=2	DP=90	synonymous_variant
05 Pool	07	05 Pool_07 plate_17 well	NO28G00050	GCGTGGGGAAGAGAAGTCTG	Unknown protein	chr28: 16256	T	G	AO=2	DP=90	synonymous_variant
05 Pool	07	05 Pool_07 plate_21 well	NO28G00050	GCGTGGGGAAGAGAAGTCTG	Unknown protein	chr28: 16256	T	G	AO=2	DP=90	synonymous_variant
05 Pool	07	05 Pool_07 plate_22 well	NO14G00970	ATTTTCATCCAAAAGCAGGG	Beta-aspartyl asparaginyl family	chr14: 327854	C	CT	AO=1	DP=128	frameshift_variant
05 Pool	07	05 Pool_07 plate_22 well	NO28G00050	GCGTGGGGAAGAGAAGTCTG	Unknown protein	chr28: 16256	T	G	AO=2	DP=90	synonymous_variant
05 Pool	07	05 Pool_07 plate_23 well	NO18G01210	CCTGCCGATCCCAGGTACGG	casein kinase 1	chr18: 422320	CG	C,CGC	AO=2,1	DP=166	frameshift_variant
05 Pool	07	05 Pool_07 plate_24 well	NO28G00050	GCGTGGGGAAGAGAAGTCTG	Unknown protein	chr28: 16256	T	G	AO=2	DP=90	synonymous_variant
05 Pool	08	05 Pool_08 plate_03 well	NO02G04860	CAAGGTACACACAACTACGG	transferases, transferring acyl groups other than amino-acyl groups;acyltransferases;transferases, transferring acyl groups other than amino-acyl groups;acyltransferases;transferases, transferring acyl groups other than amino-acyl groups;acyltransferases;Esterase/lipase/thioesterase family protein	chr2: 1314401	G	A	AO=2	DP=233	missense_variant
05 Pool	08	05 Pool_08 plate_10 well	NO28G01580	TGGTTCGCCTCCAGGCACAG	Methyltransferase family	chr28: 503751	CTG	C	AO=7	DP=238	frameshift_variant
05 Pool	08	05 Pool_08 plate_11 well	NO05G02880	TGCCAAGCTCTTATCCTACG	Estradiol 17-beta-dehydrogenase 12-b	chr5: 756943	T	TA	AO=4	DP=213	frameshift_variant
05 Pool	08	05 Pool_08 plate_16 well	NO01G05430	TATCACCCTTACCTTCACGG	Unknown protein	chr1: 1486959	GAGGTGAGGGTCAGCGTCGGCTGGGCCGCCGTGA	G,GAGGTGAGGGTCAGCGTCGGCTGGGCCGCTGA,GAGGTGAGGGTCAGCGTCGGCTGGGCCGCCGGTGA,GAGGTGAGGGTCAGCGTCGGCTGGGCCGCCGTTGA	AO=1,2,1,1	DP=182	frameshift_variant
05 Pool	08	05 Pool_08 plate_17 well	NO02G04860	CAAGGTACACACAACTACGG	transferases, transferring acyl groups other than amino-acyl groups;acyltransferases;transferases, transferring acyl groups other than amino-acyl groups;acyltransferases;transferases, transferring acyl groups other than amino-acyl groups;acyltransferases;Esterase/lipase/thioesterase family protein	chr2: 1314401	G	A	AO=2	DP=233	missense_variant
05 Pool	08	05 Pool_08 plate_20 well	NO16G00150	CATATGGCGAGAAAAGGTGG	Unknown protein;Unknown protein	chr16: 54757	CCA	C	AO=2	DP=235	frameshift_variant
05 Pool	08	05 Pool_08 plate_21 well	NO10G02740	AAGGTGCTTGCATCAGACCA	Unknown protein	chr10: 753898	GACC	G	AO=1	DP=221	disruptive_inframe_deletion
05 Pool	08	05 Pool_08 plate_22 well	NO03G05530	GGCGCACGGTATTTCCACCA	Unknown protein;Unknown protein	chr3: 1587451	TTGG	T	AO=4	DP=189	disruptive_inframe_deletion
05 Pool	08	05 Pool_08 plate_23 well	NO02G04860	CAAGGTACACACAACTACGG	transferases, transferring acyl groups other than amino-acyl groups;acyltransferases;transferases, transferring acyl groups other than amino-acyl groups;acyltransferases;transferases, transferring acyl groups other than amino-acyl groups;acyltransferases;Esterase/lipase/thioesterase family protein	chr2: 1314401	G	A	AO=2	DP=233	missense_variant
05 Pool	08	05 Pool_08 plate_04 well	NO27G01200	CCAGGACGCTATCCACCAAG	Peroxin-5	chr27: 384238	C	T	AO=2	DP=183	missense_variant
05 Pool	09	05 Pool_09 plate_03 well	NO05G04810	GCCCAGAAATGGAAGCATGG	Ribosomal rna-processing protein 8	chr5: 1249708	A	AG	AO=1	DP=166	frameshift_variant
05 Pool	09	05 Pool_09 plate_05 well	NO22G01900	CGAGACCATATTCAGCATGG	Cytochrome p450;Cytochrome p450	chr22: 570787	A	AA,AC,AT	AO=1,1,1	DP=212	frameshift_variant
05 Pool	09	05 Pool_09 plate_10 well	NO13G02420	GATCCTACACCAGTTGACCA	Udp-glc gal endoplasmic reticulum nucleotide sugar transporter	chr13: 669557	A	AT	AO=7	DP=210	frameshift_variant
05 Pool	09	05 Pool_09 plate_12 well	NO14G03060	GATAGAGGATGTGACCTGAG	O-acyltransferase	chr14: 903955	GTGACC	G,GTGAC	AO=3,10	DP=227	frameshift_variant
05 Pool	09	05 Pool_09 plate_13 well	NO26G00150	TAATTCAGCAGCACACCAGG	Acyl-CoA synthetases (AMP-forming)/AMP-acid ligases II	chr26: 49595	TG	T	AO=13	DP=156	frameshift_variant
05 Pool	09	05 Pool_09 plate_18 well	NO26G01790	CACAGGCGACATTTACCGGG	EXS (ERD1/XPR1/SYG1) family protein	chr26: 598277	CCGGGGGGGAAAG	GGGGGGGAAAG,CCGGGGGGAAAG,CCCGGGGGGGAAAG,CCGGGGGGGAAAT	AO=1,1,2,1	DP=187	frameshift_variant
05 Pool	09	05 Pool_09 plate_20 well	NO30G00830	CTGTTCAAGAAGATCGAGGG	Unknown protein;Unknown protein;Unknown protein	chr30: 303306	CGA	C	AO=2	DP=202	frameshift_variant
05 Pool	09	05 Pool_09 plate_21 well	NO09G04260	AAGCTAGGTGTTATGCTGAG	Nucleotide-diphospho-sugar transferase family protein	chr9: 1274534	C	CA	AO=18	DP=247	frameshift_variant
05 Pool	09	05 Pool_09 plate_24 well	NO02G05640	AGGGATTTGCTGTCTCAGGG	Glucokinase	chr2: 1498039	AG	ACAG,AAG,CC	AO=1,1,1	DP=213	frameshift_variant
05 Pool	10	05 Pool_10 plate_01 well	NO09G01540	CGATAGCTCAGACAACTCGT	Unknown protein	chr9: 488686	C	CG	AO=2	DP=106	frameshift_variant
05 Pool	10	05 Pool_10 plate_02 well	NO07G03390	CCACTCTGGAAGCAAGACGG	Unknown protein	chr7: 931975	ACGG	A,AACGG,AGCGG,ATCGG	AO=1,2,2,4	DP=122	frameshift_variant
05 Pool	10	05 Pool_10 plate_03 well	NO14G02010	ATGTCTTGCGAGGATCGCCG	BolA-like family protein;BolA-like family protein	chr14: 613859	G	GT	AO=5	DP=140	frameshift_variant
05 Pool	10	05 Pool_10 plate_05 well	NO06G00330	CAACGGTGACTCCATGACGC	Elongation factor 3	chr6: 142812	GT	T,GG	AO=2,1	DP=117	frameshift_variant
05 Pool	10	05 Pool_10 plate_07 well	NO25G02030	GGCTTCATTAGACATTTGCG	Chalcone isomerase-like protein	chr25: 638592	CA	C,CAA	AO=3,1	DP=101	frameshift_variant
05 Pool	10	05 Pool_10 plate_08 well	NO04G04530	CCTGATATACAATTCTCCGT	Unknown protein;Unknown protein	chr4: 1235165	CTCCG	C	AO=1	DP=101	frameshift_variant
05 Pool	10	05 Pool_10 plate_09 well	NO25G02030	GGCTTCATTAGACATTTGCG	Chalcone isomerase-like protein	chr25: 638592	CA	C,CAA	AO=3,1	DP=101	frameshift_variant
05 Pool	10	05 Pool_10 plate_10 well	NO02G04250	GAACTTGGAAGACCTGCTCG	Kinesin-like protein kif11	chr2: 1155589	C	CC,CT	AO=2,1	DP=97	frameshift_variant
05 Pool	10	05 Pool_10 plate_10 well	NO04G04530	CCTGATATACAATTCTCCGT	Unknown protein;Unknown protein	chr4: 1235165	CTCCG	C	AO=1	DP=101	frameshift_variant
05 Pool	10	05 Pool_10 plate_12 well	NO08G04190	CATAACTGTCCAGAGTGAAG	Unknown protein	chr8: 1209769	TCA	TA,T,TCCA	AO=1,1,1	DP=127	frameshift_variant
05 Pool	10	05 Pool_10 plate_13 well	NO02G02020	CAGTTTACCATCCTGGCCAA	Cop9 signalosome complex subunit 7a	chr2: 577682	G	T	AO=4	DP=97	synonymous_variant
05 Pool	10	05 Pool_10 plate_14 well	NO15G01490	TCGCAACGACTGATCCCCCG	Peptidyl serine alpha-galactosyltransferase	chr15: 419515	TCC	TC,T	AO=1,1	DP=94	frameshift_variant
05 Pool	10	05 Pool_10 plate_14 well	NO25G02030	GGCTTCATTAGACATTTGCG	Chalcone isomerase-like protein	chr25: 638592	CA	C,CAA	AO=3,1	DP=101	frameshift_variant
05 Pool	10	05 Pool_10 plate_18 well	NO18G00180	CCACGAGTATAAATTGAAGG	Unknown protein	chr18: 70360	A	AA,AC	AO=1,1	DP=147	frameshift_variant
05 Pool	10	05 Pool_10 plate_20 well	NO01G04600	CCACAGCAAGAAAACCACAG	Ankyrin unc44	chr1: 1217451	AC	A	AO=1	DP=111	frameshift_variant
05 Pool	10	05 Pool_10 plate_21 well	NO09G03670	ATGCCCCTGAGAAGCCGTCG	Unknown protein;Unknown protein;Unknown protein;Unknown protein	chr9: 1059155	CCGT	C,CCGGT	AO=2,5	DP=101	frameshift_variant
05 Pool	10	05 Pool_10 plate_23 well	NO08G02630	CCTCAACACTGTAGCAACGG	CBS domain-containing protein with a domain of unknown function (DUF21)	chr8: 738261	TGTAGCAA	T,TGTAGCAAA	AO=2,2	DP=112	frameshift_variant
05 Pool	10	05 Pool_10 plate_23 well	NO25G02030	GGCTTCATTAGACATTTGCG	Chalcone isomerase-like protein	chr25: 638592	CA	C,CAA	AO=3,1	DP=101	frameshift_variant
05 Pool	11	05 Pool_11 plate_03 well	NO28G00450	GGGAGCATCGAGCGTTTCGA	Unknown protein	chr28: 172156	TT	T,TA	AO=4,1	DP=113	frameshift_variant
05 Pool	11	05 Pool_11 plate_04 well	NO01G02570	TTGGCGAACAGAGAGCGGGG	Unknown protein	chr1: 667123	TC	T	AO=2	DP=140	frameshift_variant
05 Pool	11	05 Pool_11 plate_05 well	NO03G00060	GCTGCTCCTTGAGTTCACAG	Ubiquitin-conjugating enzyme e2	chr3: 17257	GT	GTT,GA,TT	AO=1,1,1	DP=169	frameshift_variant
05 Pool	11	05 Pool_11 plate_06 well	NO05G05050	TCACGCCCACATGTACACCG	Pyruvate kinase	chr5: 1316786	GGT	G	AO=5	DP=146	frameshift_variant
05 Pool	11	05 Pool_11 plate_08 well	NO15G00130	CGCTATCGCCACCCACATCG	Unknown protein	chr15: 30920	C	CAT	AO=6	DP=86	frameshift_variant
05 Pool	11	05 Pool_11 plate_13 well	NO14G00950	ATCCAGACGCATCCTCTACC	Unknown protein	chr14: 323554	TCTA	T	AO=2	DP=140	disruptive_inframe_deletion
05 Pool	11	05 Pool_11 plate_14 well	NO08G03200	AGCTGTGAAGAAACCACGCA	D-xylose-proton symporter-like protein	chr8: 879198	CGT	C	AO=2	DP=140	frameshift_variant
05 Pool	11	05 Pool_11 plate_15 well	NO01G02570	TTGGCGAACAGAGAGCGGGG	Unknown protein	chr1: 667123	TC	T	AO=2	DP=140	frameshift_variant
05 Pool	11	05 Pool_11 plate_16 well	NO18G00570	GTTTGTCCTCGAATAGAAGG	Leucine-rich repeat (LRR) family protein	chr18: 235364	CT	C,CTC,CTG	AO=2,1,1	DP=130	frameshift_variant
05 Pool	11	05 Pool_11 plate_19 well	NO04G05120	CACCTGACACGTTAAGACAC	Unknown protein	chr4: 1428411	GAC	G,GACC	AO=1,2	DP=105	frameshift_variant
05 Pool	11	05 Pool_11 plate_20 well	NO26G00670	GAAGTCAACCGATAAACGTG	P-loop containing nucleoside triphosphate hydrolases superfamily protein	chr26: 240140	T	G	AO=3	DP=91	synonymous_variant
05 Pool	12	05 Pool_12 plate_01 well	NO04G05030	GCAGCAGCAATCGTTCCCGG	Unknown protein	chr4: 1401140	CC	A,C	AO=1,6	DP=174	frameshift_variant&missense_variant
05 Pool	12	05 Pool_12 plate_02 well	NO06G00420	TGCAGGAAGTCTTTATCACG	Activating signal cointegrator 1	chr6: 183460	GTCTTTATCACGGGGTCCA	GTCTTTAAACGGGGTCCA,G,GTCTTTATCCACGGGGTCCA,GTCTTTATGACGGGGTCCA	AO=1,1,1,1	DP=158	frameshift_variant&missense_variant
05 Pool	12	05 Pool_12 plate_03 well	NO21G01090	GAGGTAAGGCACGTCGCACG	Unknown protein	chr21: 342833	TCGCA	TCA,T,TCG,TCGCCA	AO=5,2,7,2	DP=184	frameshift_variant
05 Pool	12	05 Pool_12 plate_04 well	NO27G01200	CCAGGACGCTATCCACCAAG	Peroxin-5	chr27: 384230	CCAC	C,CCA	AO=1,2	DP=143	frameshift_variant
05 Pool	12	05 Pool_12 plate_07 well	NO06G03320	TGAAGCGCAAGCAACAGCCA	Unknown protein	chr6: 921407	C	A	AO=2	DP=169	missense_variant
05 Pool	12	05 Pool_12 plate_08 well	NO12G01470	ATGGAAGGTTCATTTCGAGG	TPR-containing protein DDB_G0280363	chr12: 457663	TCG	T	AO=1	DP=150	frameshift_variant
05 Pool	12	05 Pool_12 plate_09 well	NO06G03320	TGAAGCGCAAGCAACAGCCA	Unknown protein	chr6: 921407	C	A	AO=2	DP=169	missense_variant
05 Pool	12	05 Pool_12 plate_11 well	NO29G00180	GAATCTGGCGCTACCCACAT	Px domain containing protein	chr29: 76299	CAC	C,CAAC,CAAAC,CAGC,CAT	AO=4,2,1,1,1	DP=208	frameshift_variant
05 Pool	12	05 Pool_12 plate_12 well	NO15G01290	CTGGGATGGTACTTCCAGAG	Beta-lactamase/transpeptidase-like protein	chr15: 364334	C	CA	AO=15	DP=165	frameshift_variant
05 Pool	12	05 Pool_12 plate_12 well	NO29G00180	GAATCTGGCGCTACCCACAT	Px domain containing protein	chr29: 76299	CAC	C,CAAC,CAAAC,CAGC,CAT	AO=4,2,1,1,1	DP=208	frameshift_variant
05 Pool	12	05 Pool_12 plate_13 well	NO14G01220	TGTGTGAGTAGTGTGACGAG	Unknown protein	chr14: 396661	TAGTGTGACGAGTGGTAGC	T	AO=1	DP=108	disruptive_inframe_deletion
05 Pool	12	05 Pool_12 plate_14 well	NO01G01490	ACAGCTAAAACGATACCAGG	Unknown protein	chr1: 380748	TG	T,TGG	AO=2,1	DP=195	frameshift_variant
05 Pool	12	05 Pool_12 plate_15 well	NO10G01250	GTTCACGGCATCATTAACCT	Unknown protein	chr10: 369798	CGCTGCCGAGGTTAATGAT	C	AO=6	DP=175	disruptive_inframe_deletion
05 Pool	12	05 Pool_12 plate_16 well	NO29G00540	TCCGCCACCGAGATCGCGAG	Unknown protein	chr29: 210571	GCG	G,GC,GCCG	AO=4,1,1	DP=201	frameshift_variant
05 Pool	12	05 Pool_12 plate_16 well	NO07G02040	AGACGATGATATCCGCGACG	Dna polymerase eta	chr7: 597332	GCGA	G,GCA,GCGTA	AO=2,1,3	DP=207	frameshift_variant
05 Pool	12	05 Pool_12 plate_17 well	NO23G01110	CCTTTCGGCTCGACTTCCAG	Unknown protein	chr23: 405808	TC	T,TCC	AO=1,1	DP=165	frameshift_variant
05 Pool	12	05 Pool_12 plate_21 well	NO06G03320	TGAAGCGCAAGCAACAGCCA	Unknown protein	chr6: 921407	C	A	AO=2	DP=169	missense_variant
05 Pool	12	05 Pool_12 plate_22 well	NO24G00770	GTCTGAAGGCCGGGCCAAGG	Unknown protein	chr24: 225960	A	AC	AO=2	DP=217	frameshift_variant
05 Pool	12	05 Pool_12 plate_24 well	NO06G03320	TGAAGCGCAAGCAACAGCCA	Unknown protein	chr6: 921407	C	A	AO=2	DP=169	missense_variant
05 Pool	13	05 Pool_13 plate_01 well	NO15G02940	TGTACTTTCCATGATTACGG	FUNCTIONS IN: molecular_function unknown; INVOLVED IN: biological_process unknown; LOCATED IN: chloroplast;	chr15: 801422	A	AC,AT	AO=1,1	DP=247	frameshift_variant
05 Pool	13	05 Pool_13 plate_01 well	NO02G00650	CTACCAACAGCAAAACAAGA	Core-2 i-branching enzyme	chr2: 224934	AACAAG	A	AO=1	DP=193	frameshift_variant
05 Pool	13	05 Pool_13 plate_02 well	NO15G02940	TGTACTTTCCATGATTACGG	FUNCTIONS IN: molecular_function unknown; INVOLVED IN: biological_process unknown; LOCATED IN: chloroplast;	chr15: 801422	A	AC,AT	AO=1,1	DP=247	frameshift_variant
05 Pool	13	05 Pool_13 plate_03 well	NO15G02940	TGTACTTTCCATGATTACGG	FUNCTIONS IN: molecular_function unknown; INVOLVED IN: biological_process unknown; LOCATED IN: chloroplast;	chr15: 801422	A	AC,AT	AO=1,1	DP=247	frameshift_variant
05 Pool	13	05 Pool_13 plate_04 well	NO07G04640	GGGGTAAATATCCACCCGTG	Protein kinase	chr7: 1308371	CCACC	C,CCA,CCAAC	AO=1,1,1	DP=182	frameshift_variant
05 Pool	13	05 Pool_13 plate_04 well	NO15G02940	TGTACTTTCCATGATTACGG	FUNCTIONS IN: molecular_function unknown; INVOLVED IN: biological_process unknown; LOCATED IN: chloroplast;	chr15: 801422	A	AC,AT	AO=1,1	DP=247	frameshift_variant
05 Pool	13	05 Pool_13 plate_05 well	NO20G01080	CTGTCCCTTCATATTGACGA	Spindle pole body component	chr20: 345668	TGAC	T	AO=8	DP=169	disruptive_inframe_deletion
05 Pool	13	05 Pool_13 plate_05 well	NO15G02940	TGTACTTTCCATGATTACGG	FUNCTIONS IN: molecular_function unknown; INVOLVED IN: biological_process unknown; LOCATED IN: chloroplast;	chr15: 801422	A	AC,AT	AO=1,1	DP=247	frameshift_variant
05 Pool	13	05 Pool_13 plate_06 well	NO15G02940	TGTACTTTCCATGATTACGG	FUNCTIONS IN: molecular_function unknown; INVOLVED IN: biological_process unknown; LOCATED IN: chloroplast;	chr15: 801422	A	AC,AT	AO=1,1	DP=247	frameshift_variant
05 Pool	13	05 Pool_13 plate_07 well	NO03G04610	GAGCGAATCAAGATTAAGCA	Dynein light chain roadblock-type 2	chr3: 1325544	CT	C	AO=1	DP=226	frameshift_variant
05 Pool	13	05 Pool_13 plate_07 well	NO15G02940	TGTACTTTCCATGATTACGG	FUNCTIONS IN: molecular_function unknown; INVOLVED IN: biological_process unknown; LOCATED IN: chloroplast;	chr15: 801422	A	AC,AT	AO=1,1	DP=247	frameshift_variant
05 Pool	13	05 Pool_13 plate_08 well	NO18G00680	ATAGTTGAGATGGATGCCAT	Ankyrin repeat-containing domain protein	chr18: 280952	GC	G	AO=3	DP=174	frameshift_variant
05 Pool	13	05 Pool_13 plate_09 well	NO04G01310	CTGCTGGGGCGTCTTGACAG	Leukotriene a4 hydrolase	chr4: 408686	A	AC	AO=9	DP=233	frameshift_variant
05 Pool	13	05 Pool_13 plate_10 well	NO26G00200	TCTGGTCTCCTTCGTCTCGG	Unknown protein	chr26: 67439	GTC	G,TTC	AO=5,1	DP=176	frameshift_variant
05 Pool	13	05 Pool_13 plate_11 well	NO01G02830	TCTTGGCGAGACGCACACGA	Checkpoint kinase	chr1: 732421	CGT	C,CG,CGTT	AO=1,1,1	DP=190	frameshift_variant
05 Pool	13	05 Pool_13 plate_11 well	NO15G02940	TGTACTTTCCATGATTACGG	FUNCTIONS IN: molecular_function unknown; INVOLVED IN: biological_process unknown; LOCATED IN: chloroplast;	chr15: 801422	A	AC,AT	AO=1,1	DP=247	frameshift_variant
05 Pool	13	05 Pool_13 plate_12 well	NO01G04880	CAGTGACGAAGAGATGTTTG	Aureochrome1-like protein	chr1: 1291829	CAAAC	C,CAAC,CAA,CAAAAC	AO=2,3,1,2	DP=141	frameshift_variant
05 Pool	13	05 Pool_13 plate_12 well	NO15G02940	TGTACTTTCCATGATTACGG	FUNCTIONS IN: molecular_function unknown; INVOLVED IN: biological_process unknown; LOCATED IN: chloroplast;	chr15: 801422	A	AC,AT	AO=1,1	DP=247	frameshift_variant
05 Pool	13	05 Pool_13 plate_13 well	NO15G02940	TGTACTTTCCATGATTACGG	FUNCTIONS IN: molecular_function unknown; INVOLVED IN: biological_process unknown; LOCATED IN: chloroplast;	chr15: 801422	A	AC,AT	AO=1,1	DP=247	frameshift_variant
05 Pool	13	05 Pool_13 plate_13 well	NO01G03390	GCATAGGAATGTCCTGCAGG	Unknown protein	chr1: 889136	C	CG	AO=6	DP=223	frameshift_variant
05 Pool	13	05 Pool_13 plate_15 well	NO08G04090	GGACGAATACCATTTCAAGG	Unknown protein	chr8: 1167347	T	TT,C	AO=1,1	DP=119	frameshift_variant
05 Pool	13	05 Pool_13 plate_16 well	NO12G00360	GAGCGAATATTACGATGAGG	Unknown protein;Unknown protein	chr12: 126008	G	GA,GC,C	AO=1,1,1	DP=186	frameshift_variant
05 Pool	13	05 Pool_13 plate_17 well	NO03G02980	TGTGACATTTGAAGACATCG	Endothelin-converting enzyme 2	chr3: 893270	A	AT	AO=9	DP=195	frameshift_variant
05 Pool	13	05 Pool_13 plate_17 well	NO15G02940	TGTACTTTCCATGATTACGG	FUNCTIONS IN: molecular_function unknown; INVOLVED IN: biological_process unknown; LOCATED IN: chloroplast;	chr15: 801422	A	AC,AT	AO=1,1	DP=247	frameshift_variant
05 Pool	13	05 Pool_13 plate_18 well	NO15G02940	TGTACTTTCCATGATTACGG	FUNCTIONS IN: molecular_function unknown; INVOLVED IN: biological_process unknown; LOCATED IN: chloroplast;	chr15: 801422	A	AC,AT	AO=1,1	DP=247	frameshift_variant
05 Pool	13	05 Pool_13 plate_19 well	NO15G02940	TGTACTTTCCATGATTACGG	FUNCTIONS IN: molecular_function unknown; INVOLVED IN: biological_process unknown; LOCATED IN: chloroplast;	chr15: 801422	A	AC,AT	AO=1,1	DP=247	frameshift_variant
05 Pool	13	05 Pool_13 plate_20 well	NO04G02620	CGCGGCGTGTTAGGTCACAG	Unknown protein	chr4: 699722	T	TAT,A	AO=1,2	DP=164	frameshift_variant
05 Pool	13	05 Pool_13 plate_20 well	NO15G02940	TGTACTTTCCATGATTACGG	FUNCTIONS IN: molecular_function unknown; INVOLVED IN: biological_process unknown; LOCATED IN: chloroplast;	chr15: 801422	A	AC,AT	AO=1,1	DP=247	frameshift_variant
05 Pool	13	05 Pool_13 plate_21 well	NO15G02940	TGTACTTTCCATGATTACGG	FUNCTIONS IN: molecular_function unknown; INVOLVED IN: biological_process unknown; LOCATED IN: chloroplast;	chr15: 801422	A	AC,AT	AO=1,1	DP=247	frameshift_variant
05 Pool	13	05 Pool_13 plate_22 well	NO08G02510	GCAAAACAGCAGATCACGTG	Pol polyprotein	chr8: 721309	TCA	T	AO=2	DP=180	frameshift_variant
05 Pool	13	05 Pool_13 plate_23 well	NO08G03410	TGGGCTGGGTAGGAAAAACG	ATP binding cassette subfamily B4	chr8: 946509	GA	G,AA	AO=7,1	DP=214	frameshift_variant
05 Pool	13	05 Pool_13 plate_13 well	NO13G00150	TCCTTCTCTCACTACCAACG	CWF19-like protein 2	chr13: 62043	CGAG	C	AO=1	DP=54	disruptive_inframe_deletion
05 Pool	14	05 Pool_14 plate_01 well	NO06G03480	GATTTGGTTTGACATGCCGA	Unknown protein	chr6: 961141	G	CG,ACG,A	AO=1,3,1	DP=159	frameshift_variant
05 Pool	14	05 Pool_14 plate_03 well	NO14G01660	CGATTGCAATGTGTGCCTGT	Ring finger protein	chr14: 516721	G	A	AO=2	DP=208	synonymous_variant
05 Pool	14	05 Pool_14 plate_06 well	NO05G05210	GTAAAGGAAGACGTCCCCGT	UPF0769 protein C21orf59 homolog	chr5: 1377744	TC	T	AO=5	DP=136	frameshift_variant
05 Pool	14	05 Pool_14 plate_08 well	NO03G03830	GCAATAAAGCGGATCCCAGA	Unknown protein	chr3: 1129184	T	TC	AO=2	DP=170	frameshift_variant
05 Pool	14	05 Pool_14 plate_09 well	NO02G00560	CTGGTACCACATCAGCAACG	Thymidylate synthase;Thymidylate synthase;Thymidylate synthase	chr2: 195027	GT	G	AO=1	DP=173	frameshift_variant
05 Pool	14	05 Pool_14 plate_10 well	NO17G01640	GTGCATGCGAGAGTCTACAG	Paraquat-inducible protein A	chr17: 481079	TA	T,TAA,TAC	AO=1,8,2	DP=174	frameshift_variant
05 Pool	14	05 Pool_14 plate_11 well	NO11G00780	GTCGGCGGAGCTGAGCACTG	Na+ h+ antiporter	chr11: 316961	C	CA,CAA	AO=4,1	DP=217	frameshift_variant
05 Pool	14	05 Pool_14 plate_13 well	NO09G00390	GTACAGCATCACCACCAACG	Sorting nexin 1	chr9: 177170	CA	C,CAA	AO=1,1	DP=162	frameshift_variant
05 Pool	14	05 Pool_14 plate_16 well	NO13G02780	GTCCTGTTCTCCAGACCGTG	Unknown protein	chr13: 772620	AC	A,ACC	AO=5,5	DP=170	frameshift_variant
05 Pool	14	05 Pool_14 plate_18 well	NO14G02690	TGATTGACAAGATCGAAAGG	Unknown protein;Pairing protein 2 family protein	chr14: 792191	C	CT,T	AO=4,1	DP=181	frameshift_variant
05 Pool	14	05 Pool_14 plate_21 well	NO26G00530	CCAAGTTTTCAAGAACAGAG	Phosphatidylinositol--trisphosphate 5-phosphatase 2	chr26: 191420	AAC	A	AO=1	DP=179	frameshift_variant
05 Pool	15	05 Pool_15 plate_01 well	NO23G00250	GTGTAAGACGAACATGCTGG	Serine/threonine-protein phosphatase 6 regulatory ankyrin repeat subunit A	chr23: 106608	C	CT	AO=3	DP=198	frameshift_variant
05 Pool	15	05 Pool_15 plate_04 well	NO22G01830	GCAGTTGACCCACATTCACG	Unknown protein;Unknown protein	chr22: 551166	CGT	C,CGC	AO=2,1	DP=219	frameshift_variant&stop_lost
05 Pool	15	05 Pool_15 plate_06 well	NO07G01580	CCGCATTATTGGTGTCGTAG	Pleckstrin like protein;Pleckstrin like protein	chr7: 479464	GTGTCGTAGCGGA	G,GTGTCGAGCGGA,GTGTCGGTAGCGGA,GTGTCGTAACGGA	AO=1,1,1,1	DP=212	frameshift_variant
05 Pool	15	05 Pool_15 plate_07 well	NO22G01830	GCAGTTGACCCACATTCACG	Unknown protein;Unknown protein	chr22: 551166	CGT	C,CGC	AO=2,1	DP=219	frameshift_variant&stop_lost
05 Pool	15	05 Pool_15 plate_08 well	NO03G04840	GCTTCCAGTACAAGGCATCG	Unknown protein	chr3: 1380866	A	AC	AO=9	DP=215	frameshift_variant
05 Pool	15	05 Pool_15 plate_08 well	NO22G01830	GCAGTTGACCCACATTCACG	Unknown protein;Unknown protein	chr22: 551166	CGT	C,CGC	AO=2,1	DP=219	frameshift_variant&stop_lost
05 Pool	15	05 Pool_15 plate_09 well	NO20G02040	CGTGTTGCTGCTCATGTACG	Endonuclease/exonuclease/phosphatase;Endonuclease/exonuclease/phosphatase;Endonuclease/exonuclease/phosphatase	chr20: 605371	ATG	A	AO=9	DP=233	frameshift_variant
05 Pool	15	05 Pool_15 plate_10 well	NO12G02190	GAGCTCCCTTAGACGTGACG	Misato-like protein	chr12: 629641	TG	T	AO=6	DP=240	frameshift_variant
05 Pool	15	05 Pool_15 plate_11 well	NO06G04500	TCTGCACAGAGTGTACGAGG	Unknown protein;Unknown protein;Unknown protein	chr6: 1271722	T	TC	AO=1	DP=181	frameshift_variant
05 Pool	15	05 Pool_15 plate_14 well	NO22G01830	GCAGTTGACCCACATTCACG	Unknown protein;Unknown protein	chr22: 551166	CGT	C,CGC	AO=2,1	DP=219	frameshift_variant&stop_lost
05 Pool	15	05 Pool_15 plate_14 well	NO29G01500	GTACCCCTTGACACTTGGCG	Unknown protein	chr29: 476898	TGG	TG,T	AO=9,1	DP=220	frameshift_variant
05 Pool	15	05 Pool_15 plate_15 well	NO04G04290	GAACGAGCAGAGGTCCAACG	Cellulase 2	chr4: 1160327	C	CA,CAA	AO=2,8	DP=237	frameshift_variant
05 Pool	15	05 Pool_15 plate_16 well	NO04G03470	CGTGCCGCACAACCCCAATG	Unknown protein	chr4: 947901	CA	C,CAAAA,CAC	AO=3,1,2	DP=224	frameshift_variant
05 Pool	15	05 Pool_15 plate_17 well	NO01G02710	TGATGGCAGAGGTACGACGA	PsbB mRNA maturation factor	chr1: 703187	TACG	T	AO=5	DP=210	disruptive_inframe_deletion
05 Pool	15	05 Pool_15 plate_18 well	NO15G00850	CCCACCAGTGAAAAAAACAG	Adipocyte plasma membrane-associated	chr15: 262088	CAGTGAAAAAAAC	CAGTGAAAAA,CAGTGAAAAAAA,C,CAGTGAAAAAAC	AO=1,1,1,1	DP=231	frameshift_variant
05 Pool	15	05 Pool_15 plate_21 well	NO14G02530	ACGTACTTGACAGAGCCACA	Protein phosphatase methylesterase 1	chr14: 763271	G	GC	AO=7	DP=242	frameshift_variant
05 Pool	15	05 Pool_15 plate_22 well	NO05G01780	CCATAAATATTCACCCCCGG	Unknown protein	chr5: 490070	AC	A	AO=6	DP=230	frameshift_variant
05 Pool	16	05 Pool_16 plate_01 well	NO06G00430	GGAGGGCATAGATACCCCGG	O-glucosyltransferase LpsA;Unknown protein	chr6: 186744	CG	C	AO=1	DP=151	frameshift_variant
05 Pool	16	05 Pool_16 plate_01 well	NO01G03570	GCGTGGTCGAGCAAACACAA	DNA mismatch repair protein Mlh3	chr1: 945173	AAC	A,AACAA	AO=3,1	DP=147	frameshift_variant
05 Pool	16	05 Pool_16 plate_03 well	NO02G01520	AAAATATGCAAGAAGCAAAG	glutaredoxin-related	chr2: 454065	T	TT,TTT,TC	AO=1,1,1	DP=61	frameshift_variant
05 Pool	16	05 Pool_16 plate_04 well	NO08G01740	GCAGGATCGAAGGAACATGT	Mrna cap guanine-n7 methyltransferase 1-like protein	chr8: 542776	ACATGTTC	A,ACAATGTTC,ACCTGTTC	AO=1,1,1	DP=62	frameshift_variant
05 Pool	16	05 Pool_16 plate_04 well	NO04G01340	ATGCCAGTTGATCCACACCG	Phosphoinositol transporter	chr4: 420409	A	AT	AO=1	DP=105	frameshift_variant
05 Pool	16	05 Pool_16 plate_08 well	NO01G03570	GCGTGGTCGAGCAAACACAA	DNA mismatch repair protein Mlh3	chr1: 945173	AAC	A,AACAA	AO=3,1	DP=147	frameshift_variant
05 Pool	16	05 Pool_16 plate_09 well	NO04G01340	ATGCCAGTTGATCCACACCG	Phosphoinositol transporter	chr4: 420409	A	AT	AO=1	DP=105	frameshift_variant
05 Pool	16	05 Pool_16 plate_10 well	NO29G00210	CGAATCGAGCGTCCTCCACG	Unknown protein	chr29: 81091	CCA	C	AO=1	DP=106	frameshift_variant
05 Pool	16	05 Pool_16 plate_12 well	NO16G03230	GGCAAGTAGAGGCCGTATCG	Regulator of chromosome condensation/beta-lactamase-inhibitor protein II;Regulator of chromosome condensation/beta-lactamase-inhibitor protein II	chr16: 966783	A	AT	AO=1	DP=162	frameshift_variant
05 Pool	16	05 Pool_16 plate_13 well	NO29G00210	CGAATCGAGCGTCCTCCACG	Unknown protein	chr29: 81091	CCA	C	AO=1	DP=106	frameshift_variant
05 Pool	16	05 Pool_16 plate_14 well	NO05G02020	GAGCCCGAAAGAGTGTCTCG	Unknown protein	chr5: 546121	GAG	GAAC,AAG	AO=7,1	DP=140	frameshift_variant&synonymous_variant
05 Pool	16	05 Pool_16 plate_15 well	NO04G01340	ATGCCAGTTGATCCACACCG	Phosphoinositol transporter	chr4: 420409	A	AT	AO=1	DP=105	frameshift_variant
05 Pool	16	05 Pool_16 plate_18 well	NO12G01340	CAGTCCCGACAGGCACCCAG	GDP-L-fucose synthetase	chr12: 419985	TG	T	AO=1	DP=139	frameshift_variant
05 Pool	16	05 Pool_16 plate_20 well	NO19G02570	TCACACTACCTTTATCACCG	4-hydroxybenzoyl-thioesterase family active site protein;4-hydroxybenzoyl-thioesterase family active site protein;4-hydroxybenzoyl-thioesterase family active site protein;4-hydroxybenzoyl-thioesterase family active site protein;4-hydroxybenzoyl-thioesterase family active site protein	chr19: 766316	GTGA	G	AO=1	DP=124	disruptive_inframe_deletion
05 Pool	16	05 Pool_16 plate_22 well	NO02G02400	ATACGAGTCACATTATCACG	FAD/NAD(P)-binding oxidoreductase family protein;FAD/NAD(P)-binding oxidoreductase family protein;FAD/NAD(P)-binding oxidoreductase family protein	chr2: 665447	TCA	T	AO=2	DP=149	frameshift_variant
05 Pool	17	05 Pool_17 plate_03 well	NO10G01570	AGGAGGCGAGAAAGTCAGTG	Gdh 6pgl endoplasmic bifunctional protein	chr10: 451559	AGTCA	A,AGTC,AGTCAA,AGTCAAA	AO=2,2,4,1	DP=209	frameshift_variant
05 Pool	17	05 Pool_17 plate_04 well	NO05G04540	AAAAAGCTACCGGTGCCAGG	Protease;Peptidase S1C;Protease	chr5: 1177353	TG	T,TGG	AO=4,6	DP=164	frameshift_variant
05 Pool	17	05 Pool_17 plate_06 well	NO01G04570	CAATACCAACATCGGCACCA	Unknown protein	chr1: 1206179	ACC	C,A,AACC,AAACC	AO=1,1,1,8	DP=177	frameshift_variant
05 Pool	17	05 Pool_17 plate_08 well	NO24G00390	AAGGATGTGCATGAGTACGT	Gtp-binding protein;Gtp-binding protein;Gtpase;Gtp-binding protein;Gtp-binding protein;Gtp-binding protein	chr24: 138618	AGTAC	A,AGTAAC,AGCAC	AO=4,1,1	DP=188	frameshift_variant
05 Pool	17	05 Pool_17 plate_10 well	NO07G00190	ACGAGCCGTCTATGTCACCA	Unknown protein	chr7: 88518	GG	G,GGT	AO=1,2	DP=158	frameshift_variant
05 Pool	17	05 Pool_17 plate_10 well	NO01G04570	CAATACCAACATCGGCACCA	Unknown protein	chr1: 1206179	ACC	C,A,AACC,AAACC	AO=1,1,1,8	DP=177	frameshift_variant
05 Pool	17	05 Pool_17 plate_11 well	NO24G00390	AAGGATGTGCATGAGTACGT	Gtp-binding protein;Gtp-binding protein;Gtpase;Gtp-binding protein;Gtp-binding protein;Gtp-binding protein	chr24: 138618	AGTAC	A,AGTAAC,AGCAC	AO=4,1,1	DP=188	frameshift_variant
05 Pool	17	05 Pool_17 plate_12 well	NO05G01370	ACGGAGACGACGTTGCAGCA	Vesicle transport protein, Use1;Vesicle transport protein, Use1;Vesicle transport protein, Use1	chr5: 392649	CCTG	C	AO=3	DP=141	conservative_inframe_deletion
05 Pool	17	05 Pool_17 plate_13 well	NO14G01890	GGTAAGATTTTCATGCCCAG	Galactose-binding protein	chr14: 581235	TG	T	AO=1	DP=153	frameshift_variant
05 Pool	17	05 Pool_17 plate_14 well	NO04G03370	TGAAGCAACACACCACAACG	Unknown protein	chr4: 929896	G	GTT	AO=8	DP=185	frameshift_variant
05 Pool	17	05 Pool_17 plate_14 well	NO01G04570	CAATACCAACATCGGCACCA	Unknown protein	chr1: 1206179	ACC	C,A,AACC,AAACC	AO=1,1,1,8	DP=177	frameshift_variant
05 Pool	17	05 Pool_17 plate_15 well	NO25G00760	GACACACGCAGACACATAGG	Ribosomal protein L6 family protein	chr25: 209407	TA	T,TAA,TAGA	AO=1,3,1	DP=158	frameshift_variant
05 Pool	17	05 Pool_17 plate_16 well	NO01G04570	CAATACCAACATCGGCACCA	Unknown protein	chr1: 1206179	ACC	C,A,AACC,AAACC	AO=1,1,1,8	DP=177	frameshift_variant
05 Pool	17	05 Pool_17 plate_16 well	NO24G00390	AAGGATGTGCATGAGTACGT	Gtp-binding protein;Gtp-binding protein;Gtpase;Gtp-binding protein;Gtp-binding protein;Gtp-binding protein	chr24: 138618	AGTAC	A,AGTAAC,AGCAC	AO=4,1,1	DP=188	frameshift_variant
05 Pool	17	05 Pool_17 plate_17 well	NO05G01150	ACAACAGAATACAGGCAATG	Ethanolamine-phosphate cytidylyltransferase	chr5: 337551	A	AA,AT	AO=1,1	DP=182	frameshift_variant
05 Pool	17	05 Pool_17 plate_17 well	NO14G01830	GTTGAGCCAGAAGGAAACCA	Protein phosphatase 2 (Formerly 2a) regulatory subunit b	chr14: 566795	GGTT	GGC,GGG,T,GGT,GGTTT,GGTTTTT	AO=1,1,1,10,5,1	DP=196	frameshift_variant&missense_variant
05 Pool	17	05 Pool_17 plate_18 well	NO01G04860	TGGCTTGATGACCATGCGAG	Peptidyl-prolyl cis-trans isomerase	chr1: 1285354	CGA	A,CA,C	AO=1,1,1	DP=223	frameshift_variant
05 Pool	17	05 Pool_17 plate_19 well	NO08G00110	GGTAATGCCGACATTGCTGG	Unknown protein	chr8: 43443	TTGC	T,TTG	AO=4,2	DP=187	frameshift_variant
05 Pool	17	05 Pool_17 plate_19 well	NO17G01190	AAATGTGCTCAGGATTGCCA	Unknown protein	chr17: 375262	GC	G,GAC,AC	AO=1,3,1	DP=176	frameshift_variant
05 Pool	17	05 Pool_17 plate_21 well	NO28G00060	TTTTGCCAAGCGTCTGCACG	Unknown protein	chr28: 18385	GC	G,GCC,GCG	AO=1,1,1	DP=175	frameshift_variant
05 Pool	17	05 Pool_17 plate_22 well	NO01G04750	TATCTACTTACTATTATCCG	Glycerol-3-phosphate dehydrogenase [NAD(+)];Glycerol-3-phosphate dehydrogenase [NAD(+)]	chr1: 1255390	TCCGGTATCTACTTACTATTAT	T,TCCGGTATCTACTTACTATT,TCCGGTATCTACTTACTATTA,TCCGGTATCTACTTACTATTATC	AO=1,1,3,1	DP=167	frameshift_variant
05 Pool	17	05 Pool_17 plate_22 well	NO01G04570	CAATACCAACATCGGCACCA	Unknown protein	chr1: 1206179	ACC	C,A,AACC,AAACC	AO=1,1,1,8	DP=177	frameshift_variant
05 Pool	17	05 Pool_17 plate_22 well	NO24G00390	AAGGATGTGCATGAGTACGT	Gtp-binding protein;Gtp-binding protein;Gtpase;Gtp-binding protein;Gtp-binding protein;Gtp-binding protein	chr24: 138618	AGTAC	A,AGTAAC,AGCAC	AO=4,1,1	DP=188	frameshift_variant
05 Pool	17	05 Pool_17 plate_23 well	NO01G04570	CAATACCAACATCGGCACCA	Unknown protein	chr1: 1206179	ACC	C,A,AACC,AAACC	AO=1,1,1,8	DP=177	frameshift_variant
05 Pool	17	05 Pool_17 plate_23 well	NO24G00390	AAGGATGTGCATGAGTACGT	Gtp-binding protein;Gtp-binding protein;Gtpase;Gtp-binding protein;Gtp-binding protein;Gtp-binding protein	chr24: 138618	AGTAC	A,AGTAAC,AGCAC	AO=4,1,1	DP=188	frameshift_variant
05 Pool	17	05 Pool_17 plate_24 well	NO14G01830	GTTGAGCCAGAAGGAAACCA	Protein phosphatase 2 (Formerly 2a) regulatory subunit b	chr14: 566795	GGTT	GGC,GGG,T,GGT,GGTTT,GGTTTTT	AO=1,1,1,10,5,1	DP=196	frameshift_variant&missense_variant
05 Pool	18	05 Pool_18 plate_03 well	NO01G01440	AGACGAGAGCAGTGACGACG	Transcription factor iws1	chr1: 369781	GTCG	G,GTCT	AO=7,1	DP=158	missense_variant
05 Pool	18	05 Pool_18 plate_04 well	NO03G05630	TGACTTTCATGAGATCCCCG	Ankyrin repeat protein	chr3: 1622852	TC	T	AO=6	DP=170	frameshift_variant
05 Pool	18	05 Pool_18 plate_04 well	NO14G00470	CGTCTCACACTCTTTCCTGG	Unknown protein	chr14: 184437	C	CG	AO=1	DP=123	frameshift_variant
05 Pool	18	05 Pool_18 plate_10 well	NO02G05820	CATCACCAAGCGTCTCATCG	Erythromycin esterase	chr2: 1557428	CGAT	C	AO=6	DP=180	conservative_inframe_deletion
05 Pool	18	05 Pool_18 plate_11 well	NO01G01440	AGACGAGAGCAGTGACGACG	Transcription factor iws1	chr1: 369781	GTCG	G,GTCT	AO=7,1	DP=158	missense_variant
05 Pool	18	05 Pool_18 plate_12 well	NO01G01440	AGACGAGAGCAGTGACGACG	Transcription factor iws1	chr1: 369781	GTCG	G,GTCT	AO=7,1	DP=158	missense_variant
05 Pool	18	05 Pool_18 plate_13 well	NO01G03770	TCATGGCGCTAATATTAACG	Transcription initiation factor iib;Transcription initiation factor iib	chr1: 1016314	T	TA	AO=4	DP=171	frameshift_variant
05 Pool	18	05 Pool_18 plate_15 well	NO14G00470	CGTCTCACACTCTTTCCTGG	Unknown protein	chr14: 184437	C	CG	AO=1	DP=123	frameshift_variant
05 Pool	18	05 Pool_18 plate_20 well	NO12G01800	AGTCATAGACAAAGTCAACA	ARM repeat superfamily protein	chr12: 527002	GT	G,GTT	AO=7,1	DP=138	frameshift_variant
05 Pool	18	05 Pool_18 plate_22 well	NO24G02420	ACTACTACAATGAATGCCTG	NAD(P)-binding Rossmann-fold superfamily protein;NAD(P)-binding Rossmann-fold superfamily protein;NAD(P)-binding Rossmann-fold superfamily protein;NAD(P)-binding Rossmann-fold superfamily protein;NAD(P)-binding Rossmann-fold superfamily protein	chr24: 662179	GC	C,GA	AO=1,1	DP=139	frameshift_variant
05 Pool	18	05 Pool_18 plate_23 well	NO14G02310	AGAAATCGAGAGTGTCCCCG	Nucleotide-diphospho-sugar transferase;Nucleotide-diphospho-sugar transferase;Nucleotide-diphospho-sugar transferase	chr14: 693457	CC	C,CG	AO=3,1	DP=160	frameshift_variant
05 Pool	18	05 Pool_18 plate_24 well	NO21G02660	CAAAGGCACAGGGTGCAAGG	Oxidoreductase transition metal ion binding protein	chr21: 819348	C	CTT	AO=2	DP=150	frameshift_variant
05 Pool	19	05 Pool_19 plate_02 well	NO06G01820	GGAACCGCGCTATACAAGCA	DNA polymerase	chr6: 552466	A	G	AO=2	DP=177	synonymous_variant
05 Pool	19	05 Pool_19 plate_03 well	NO02G05410	AGACACGTTGGATGTGACCA	Alpha-ketoglutarate-dependent dioxygenase alkB homolog 6	chr2: 1442897	CCGTGGTCACATCCAA	C	AO=2	DP=115	conservative_inframe_deletion
05 Pool	19	05 Pool_19 plate_04 well	NO02G04010	ACAGTGTGACATTTGCTGTG	E3 ubiquitin-protein ligase trim23	chr2: 1098260	TGTGACATTTGC	T	AO=1	DP=185	frameshift_variant
05 Pool	19	05 Pool_19 plate_06 well	NO03G05340	GGCATCAGGAAACTCCAACA	Beta--endoglucanase;Beta--endoglucanase;Beta--endoglucanase	chr3: 1525775	T	TG	AO=1	DP=185	frameshift_variant
05 Pool	19	05 Pool_19 plate_08 well	NO07G01700	GTAGAAGTGAACTTGCCTCG	Unknown protein	chr7: 513425	CC	C,CCT	AO=2,2	DP=172	frameshift_variant
05 Pool	19	05 Pool_19 plate_09 well	NO22G00110	GCTGAACACAGGACGATGAG	Choline transporter	chr22: 43923	C	CAA	AO=1	DP=68	frameshift_variant
05 Pool	19	05 Pool_19 plate_10 well	NO07G01940	ACGTCGTCTTAATCAGCTCG	Nudix hydrolase 13	chr7: 567806	GAG	G,GG,GA,CAG,GAT	AO=4,3,1,1,1	DP=187	frameshift_variant
05 Pool	19	05 Pool_19 plate_11 well	NO04G01060	CTGCAAATGCTTCCCCACCG	Isochorismatase	chr4: 338917	GT	G,GG	AO=5,1	DP=135	frameshift_variant
05 Pool	19	05 Pool_19 plate_16 well	NO05G04910	AACGTCCTCGACGACCCTAG	Chloride channel protein;Chloride channel protein	chr5: 1271659	A	AC	AO=1	DP=133	frameshift_variant
05 Pool	19	05 Pool_19 plate_18 well	NO04G03720	GTGTTTACCATGCTCCACCG	Cystathionine gamma-lyase;Cystathionine gamma-lyase	chr4: 1008015	G	GT	AO=3	DP=183	frameshift_variant
05 Pool	19	05 Pool_19 plate_20 well	NO16G02920	AGCAGCGTGTGTCTGTAACG	Unknown protein	chr16: 844175	T	TA	AO=5	DP=159	frameshift_variant
05 Pool	19	05 Pool_19 plate_20 well	NO06G01820	GGAACCGCGCTATACAAGCA	DNA polymerase	chr6: 552466	A	G	AO=2	DP=177	synonymous_variant
05 Pool	19	05 Pool_19 plate_21 well	NO19G02120	TTGCTTTTGGAAGAACAGGG	Unknown protein	chr19: 609390	CTGT	CT,C,CCGT	AO=1,2,1	DP=114	frameshift_variant
05 Pool	19	05 Pool_19 plate_22 well	NO27G00240	GAAGGGGTAGAAACTGACTC	Unknown protein	chr27: 87231	GT	G,GGT,GTT	AO=1,1,2	DP=141	frameshift_variant
05 Pool	19	05 Pool_19 plate_24 well	NO11G01880	TGGCAGATAAAAGCTGAATG	Unknown protein	chr11: 617559	A	AT	AO=1	DP=166	frameshift_variant
05 Pool	20	05 Pool_20 plate_03 well	NO02G04790	GGACGTATATTGGCGAAACG	Prolyl 4-alpha subunit domain protein	chr2: 1294658	TT	T,TTT,TC	AO=11,1,1	DP=200	frameshift_variant
05 Pool	20	05 Pool_20 plate_04 well	NO04G01920	GGTACCAAAAGAGACCCGTG	Unknown protein	chr4: 556979	CGG	C	AO=3	DP=185	frameshift_variant
05 Pool	20	05 Pool_20 plate_06 well	NO01G02700	ACGCCCGTAAGCACCCCGAT	Solute carrier family 35 member c2	chr1: 698978	CGG	C	AO=5	DP=177	frameshift_variant
05 Pool	20	05 Pool_20 plate_09 well	NO06G04150	CGGAGGGTTTGTCACCACGG	Ribosomal large subunit pseudouridine synthase B	chr6: 1158857	AC	A	AO=3	DP=161	frameshift_variant
05 Pool	20	05 Pool_20 plate_10 well	NO29G01160	GAGACGCATCAGCTGTCGTG	von Willebrand factor A domain-containing protein 8	chr29: 385284	GCTGTCGTG	T	AO=2	DP=145	frameshift_variant&missense_variant
05 Pool	20	05 Pool_20 plate_13 well	NO15G03040	ATCCTCGAACAATTCATCGG	Alpha beta domain protein	chr15: 839652	G	GA,GC	AO=1,2	DP=169	frameshift_variant
05 Pool	20	05 Pool_20 plate_17 well	NO11G02530	CGCCCTCAACACTGTCACAG	Ring zinc finger-containing protein	chr11: 799727	T	A	AO=2	DP=95	missense_variant
05 Pool	20	05 Pool_20 plate_18 well	NO11G02530	CGCCCTCAACACTGTCACAG	Ring zinc finger-containing protein	chr11: 799727	T	A	AO=2	DP=95	missense_variant
05 Pool	20	05 Pool_20 plate_20 well	NO18G01820	GCTGCCACCGTACAAATGCA	Unknown protein	chr18: 565959	CAAA	C	AO=1	DP=124	disruptive_inframe_deletion
05 Pool	20	05 Pool_20 plate_21 well	NO02G04070	GGGCATCGAAACGTACAGGA	Subunit of proteaseome activator complex;Subunit of proteaseome activator complex;Subunit of proteaseome activator complex	chr2: 1108578	AACGTACA	A,AACGTAC	AO=2,2	DP=165	frameshift_variant
05 Pool	20	05 Pool_20 plate_22 well	NO11G01920	GATGGCTACAAAGAGCAACA	Mitochodrial transcription termination factor	chr11: 627968	AAGAGC	A,AAGAGCA,AAGAGT	AO=1,2,1	DP=180	frameshift_variant
05 Pool	20	05 Pool_20 plate_24 well	NO04G04210	CAGAATAAGCACTAGTGACA	Retinol retinaldehyde reductase	chr4: 1147252	T	TG	AO=2	DP=149	frameshift_variant
05 Pool	21	05 Pool_21 plate_01 well	NO24G00930	AGTAATGCTCTACGTCGATG	DNA damage inducible protein	chr24: 253829	CGTCG	C,CGTCGG	AO=7,1	DP=109	frameshift_variant
05 Pool	21	05 Pool_21 plate_03 well	NO09G02660	GGCGCACAATGGCTGCCCAG	Ubiquinol cytochrome c reductase subunit qcr9	chr9: 796327	ACAATGGCTGCCCAGCGGCCAG	A,ACAATGGCTGTCCAGCGGCCAG,ACAATGGCTGCCCAGGGGCCAG	AO=1,1,1	DP=129	missense_variant
05 Pool	21	05 Pool_21 plate_03 well	NO02G04860	CAAGGTACACACAACTACGG	transferases, transferring acyl groups other than amino-acyl groups;acyltransferases;transferases, transferring acyl groups other than amino-acyl groups;acyltransferases;transferases, transferring acyl groups other than amino-acyl groups;acyltransferases;Esterase/lipase/thioesterase family protein	chr2: 1314401	G	A	AO=2	DP=177	missense_variant
05 Pool	21	05 Pool_21 plate_08 well	NO02G05240	CTTTGACGACGATCAGAGCG	Unknown protein	chr2: 1402147	G	GAAA	AO=2	DP=123	disruptive_inframe_insertion
05 Pool	21	05 Pool_21 plate_08 well	NO02G04860	CAAGGTACACACAACTACGG	transferases, transferring acyl groups other than amino-acyl groups;acyltransferases;transferases, transferring acyl groups other than amino-acyl groups;acyltransferases;transferases, transferring acyl groups other than amino-acyl groups;acyltransferases;Esterase/lipase/thioesterase family protein	chr2: 1314401	G	A	AO=2	DP=177	missense_variant
05 Pool	21	05 Pool_21 plate_09 well	NO28G00680	AATGCAATCGCTGAGCAGAG	Unknown protein	chr28: 236019	GAGC	G	AO=1	DP=160	conservative_inframe_deletion
05 Pool	21	05 Pool_21 plate_10 well	NO04G04410	AAGTACCACTACCAGCACCT	Unknown protein	chr4: 1196912	G	GTT	AO=5	DP=171	frameshift_variant
05 Pool	21	05 Pool_21 plate_11 well	NO12G02860	GTGGGTGCGATGTGTGAATG	Unknown protein	chr12: 796962	AT	A	AO=2	DP=131	frameshift_variant
05 Pool	21	05 Pool_21 plate_12 well	NO09G03590	TGTCTGCTCCAATATCAAGG	Unknown protein	chr9: 1029179	CA	C	AO=8	DP=163	frameshift_variant
05 Pool	21	05 Pool_21 plate_14 well	NO01G04420	AAAATAATGAAGGAGACCGA	Phosphoglycerate mutase family protein	chr1: 1174118	CG	A,G,ACG	AO=1,2,2	DP=158	frameshift_variant
05 Pool	21	05 Pool_21 plate_15 well	NO04G04150	GGCAACAGAGTACCATACGG	Unknown protein	chr4: 1133828	AC	A,ATC	AO=4,1	DP=151	frameshift_variant
05 Pool	21	05 Pool_21 plate_16 well	NO02G04860	CAAGGTACACACAACTACGG	transferases, transferring acyl groups other than amino-acyl groups;acyltransferases;transferases, transferring acyl groups other than amino-acyl groups;acyltransferases;transferases, transferring acyl groups other than amino-acyl groups;acyltransferases;Esterase/lipase/thioesterase family protein	chr2: 1314401	G	A	AO=2	DP=177	missense_variant
05 Pool	21	05 Pool_21 plate_17 well	NO05G02080	TGGTAAATTCTTCGACAGCA	Aminoglycoside phosphotransferase	chr5: 563076	C	CTG,T	AO=1,1	DP=166	frameshift_variant
05 Pool	21	05 Pool_21 plate_17 well	NO05G03560	GAGGCCGGGATAGGATCATG	Nxn protein	chr5: 939416	T	TC	AO=1	DP=133	frameshift_variant
05 Pool	21	05 Pool_21 plate_19 well	NO05G00120	TTTACGCCGTCATATCCCTG	Lipase family protein;Lipase family protein;Lipase family protein;Lipase family protein;Lipase family protein	chr5: 54394	GG	C,G	AO=1,2	DP=160	frameshift_variant&missense_variant
05 Pool	21	05 Pool_21 plate_20 well	NO02G00520	ACTGCCGAAGAACTTGACGG	Zn(2)-C6 fungal-type DNA-binding domain protein	chr2: 179544	G	GA	AO=1	DP=107	frameshift_variant
05 Pool	21	05 Pool_21 plate_23 well	NO30G00850	CATGTCCTACGCACGCGCGG	Unknown protein	chr30: 306923	CGC	C,CGT	AO=2,1	DP=135	frameshift_variant
05 Pool	21	05 Pool_21 plate_23 well	NO02G04860	CAAGGTACACACAACTACGG	transferases, transferring acyl groups other than amino-acyl groups;acyltransferases;transferases, transferring acyl groups other than amino-acyl groups;acyltransferases;transferases, transferring acyl groups other than amino-acyl groups;acyltransferases;Esterase/lipase/thioesterase family protein	chr2: 1314401	G	A	AO=2	DP=177	missense_variant
05 Pool	22	05 Pool_22 plate_01 well	NO19G02110	CGCCCCCAGATCCGACAAGT	Derlin	chr19: 607122	A	AC	AO=3	DP=141	frameshift_variant
05 Pool	22	05 Pool_22 plate_02 well	NO11G01060	ATGAGGACGATGTCTCTGCG	Vacuolar sorting protein 35	chr11: 397978	CAG	C,CACAG	AO=1,1	DP=118	frameshift_variant
05 Pool	22	05 Pool_22 plate_04 well	NO04G03610	GGCTACGTTCTAATCGTCGC	Mapeg family protein	chr4: 983190	GGCG	G,GGC	AO=1,1	DP=159	frameshift_variant
05 Pool	22	05 Pool_22 plate_05 well	NO25G01900	GTAACGATCTAATGACGCCA	Unknown protein	chr25: 573379	G	GA	AO=2	DP=85	frameshift_variant
05 Pool	22	05 Pool_22 plate_06 well	NO13G02450	GCTGTCGACAGTGTACGGTG	Nudix hydrolase	chr13: 679611	AC	A	AO=2	DP=124	frameshift_variant
05 Pool	22	05 Pool_22 plate_07 well	NO22G02110	CTCCGAAGTAATGTACAACG	Unknown protein	chr22: 656482	CA	C	AO=7	DP=122	frameshift_variant
05 Pool	22	05 Pool_22 plate_08 well	NO06G00440	CCGAGGCAAAGAGAACGTCG	Unknown protein	chr6: 189864	ACG	A,ATG	AO=1,1	DP=71	frameshift_variant
05 Pool	22	05 Pool_22 plate_09 well	NO20G00730	AACACCCTTGCCTTCCAACG	Unknown protein;Unknown protein	chr20: 246874	A	AG	AO=5	DP=127	frameshift_variant
05 Pool	22	05 Pool_22 plate_15 well	NO13G01970	GATAGCACGCTCCTGCACGA	Unknown protein	chr13: 567951	G	GA	AO=1	DP=151	frameshift_variant
05 Pool	22	05 Pool_22 plate_18 well	NO25G01900	GTAACGATCTAATGACGCCA	Unknown protein	chr25: 573379	G	GA	AO=2	DP=85	frameshift_variant
05 Pool	22	05 Pool_22 plate_20 well	NO01G00520	TCCCCTCAGGAGACACGTGG	carotenoid cleavage dioxygenase 1;carotenoid cleavage dioxygenase 1	chr1: 138847	AC	A,AAC	AO=1,1	DP=59	frameshift_variant
05 Pool	22	05 Pool_22 plate_21 well	NO21G02350	AAGTTGGACGAGGCGTTACG	Cop9 signalosome complex subunit 2	chr21: 708089	AAC	A	AO=1	DP=136	frameshift_variant
05 Pool	22	05 Pool_22 plate_22 well	NO25G01900	GTAACGATCTAATGACGCCA	Unknown protein	chr25: 573379	G	GA	AO=2	DP=85	frameshift_variant
05 Pool	22	05 Pool_22 plate_23 well	NO03G01710	ACCCCAAGCTGATTTCCATG	early-responsive to dehydration stress protein (ERD4)	chr3: 537537	T	TC	AO=4	DP=144	frameshift_variant
05 Pool	22	05 Pool_22 plate_23 well	NO20G00730	AACACCCTTGCCTTCCAACG	Unknown protein;Unknown protein	chr20: 246874	A	AG	AO=5	DP=127	frameshift_variant
05 Pool	22	05 Pool_22 plate_24 well	NO16G01750	TCATCATCATTAACACAATG	Mitochondrial tricarboxylate carrier family	chr16: 522479	A	AT	AO=2	DP=136	frameshift_variant
05 Pool	23	05 Pool_23 plate_01 well	NO12G01940	ATAGTGCCAGAACCACACAT	Rrna (Guanine-n-)-methyltransferase	chr12: 552894	A	AT	AO=1	DP=86	frameshift_variant
05 Pool	23	05 Pool_23 plate_03 well	NO12G01940	ATAGTGCCAGAACCACACAT	Rrna (Guanine-n-)-methyltransferase	chr12: 552894	A	AT	AO=1	DP=86	frameshift_variant
05 Pool	23	05 Pool_23 plate_17 well	NO12G01940	ATAGTGCCAGAACCACACAT	Rrna (Guanine-n-)-methyltransferase	chr12: 552894	A	AT	AO=1	DP=86	frameshift_variant
05 Pool	23	05 Pool_23 plate_18 well	NO06G02680	TTGGCTCAAAGTATGCGAAG	Retinol dehydrogenase 13	chr6: 759237	GCG	G,GCT	AO=7,1	DP=104	frameshift_variant
05 Pool	23	05 Pool_23 plate_19 well	NO12G01940	ATAGTGCCAGAACCACACAT	Rrna (Guanine-n-)-methyltransferase	chr12: 552894	A	AT	AO=1	DP=86	frameshift_variant
05 Pool	23	05 Pool_23 plate_23 well	NO12G01940	ATAGTGCCAGAACCACACAT	Rrna (Guanine-n-)-methyltransferase	chr12: 552894	A	AT	AO=1	DP=86	frameshift_variant
05 Pool	23	05 Pool_23 plate_24 well	NO01G00610	CGTCGTAGATGGATGCACCG	Unknown protein	chr1: 162795	C	CA	AO=7	DP=99	frameshift_variant
05 Pool	24	05 Pool_24 plate_01 well	NO04G04850	ACGTGCACATGAGAGTGACG	Unknown protein	chr4: 1325186	CGTCACTCTCAT	C,CGTCTCAT,CGT,CGTACTCTCAT,CGTCTCTCAT	AO=1,1,1,1,2	DP=231	frameshift_variant
05 Pool	24	05 Pool_24 plate_02 well	NO03G01180	CGAATGGAACGGGAACATCA	CRAL-TRIO domain protein;CRAL-TRIO domain protein	chr3: 367640	A	AA,AAA,AG	AO=2,11,1	DP=216	frameshift_variant
05 Pool	24	05 Pool_24 plate_06 well	NO11G02720	GAAGCAAAGAGGCGCGACTG	Unknown protein	chr11: 856043	CAGTC	TTTC,CA	AO=1,1	DP=238	frameshift_variant&missense_variant
05 Pool	24	05 Pool_24 plate_07 well	NO03G03610	CAAGTACCAGCAAAGCACCG	Cyclin-like protein	chr3: 1070662	A	AA,AG	AO=3,3	DP=213	frameshift_variant
05 Pool	24	05 Pool_24 plate_13 well	NO10G01300	ACATTAGACAGAATGATTGG	Protein-glutamate O-methyltransferase	chr10: 384258	TT	T,TG	AO=11,2	DP=203	frameshift_variant
05 Pool	24	05 Pool_24 plate_13 well	NO24G01850	GTCAGAGTGCGAGGTCGATG	Unknown protein	chr24: 491832	TCCACATCGACCTCGCACTCTGAC	T,TCCACAACGACCTCGCACTCTGAC	AO=6,1	DP=202	frameshift_variant
05 Pool	24	05 Pool_24 plate_15 well	NO24G01850	GTCAGAGTGCGAGGTCGATG	Unknown protein	chr24: 491832	TCCACATCGACCTCGCACTCTGAC	T,TCCACAACGACCTCGCACTCTGAC	AO=6,1	DP=202	frameshift_variant
05 Pool	24	05 Pool_24 plate_16 well	NO07G02700	ATTCGGCGTAGGGACCACAA	Abc transporter atp-binding protein	chr7: 779263	TGT	TGGGG,T,TGGGT	AO=1,1,4	DP=200	frameshift_variant
05 Pool	24	05 Pool_24 plate_17 well	NO03G04900	AATGATTATCATACGCAACG	Protein BROTHER of FT and TFL 1	chr3: 1398860	C	CA	AO=1	DP=181	frameshift_variant
05 Pool	24	05 Pool_24 plate_19 well	NO03G02120	ACTACATGGTCAGAGGCCGG	O-acyltransferase WSD1	chr3: 628190	CGGA	GGG	AO=6	DP=246	frameshift_variant&missense_variant
05 Pool	24	05 Pool_24 plate_21 well	NO10G03250	GCTTTACCTACCACTCAAGG	Dnase domain containing 3	chr10: 913755	CA	C	AO=2	DP=218	frameshift_variant
05 Pool	24	05 Pool_24 plate_24 well	NO04G02160	GCAACCCTGTGATTGTTGAG	Delta(3,5)-Delta(2,4)-dienoyl-CoA isomerase, mitochondrial	chr4: 622182	C	CAAA	AO=1	DP=160	conservative_inframe_insertion
06 Pool	01	06 Pool_01 plate_02 well	NO19G00500	TCCGAAGGTAAAGGAAACCG	Leucine-rich repeat, cysteine-containing subtype	chr19: 193771	CCGAAGGTAAAGGAAAC	C,CCGAAGGTAAAGCAAAC,CCGAAGGTAAAGGAAAT	AO=6,1,1	DP=192	frameshift_variant
06 Pool	01	06 Pool_01 plate_03 well	NO03G05500	TCGTCGTACAAACCATCCCG	Formamidopyrimidine-dna glycosylase	chr3: 1580674	A	ATG	AO=1	DP=205	frameshift_variant
06 Pool	01	06 Pool_01 plate_06 well	NO03G05240	CAGTGTTGATACGGTGAGGG	RING/FYVE/PHD-type zinc finger family protein	chr3: 1495875	CT	C,CTCT,CTT,TT	AO=1,1,1,3	DP=218	frameshift_variant
[truncated: 2,346 more rows]
