# Supplementary material for: High-throughput Raman-activated cell sorting of microalgal genome-wide edited library revealed a new regulatory pathway for carotenoid synthesis
Source: Research Square preprint supplement (doi:10.21203/rs.3.rs-7026720/v1), 2025-07-29
Supplement: Supplementary file 2 [file 43b314a8b1d92ff2e8ec2f39.xlsx]

## Sheet: Sheet1
	Gene number	The sequences synthesized by custom array (5'-3')
1	NO01G00240	ccgggtccgattcccggtgcctgcaGAGTGTGGTGGAATTTGCCGgttttagagctagaaatagcaagttaaaataag
2	NO01G00250	ccgggtccgattcccggtgcctgcaACACGATAGTCAAGACGCTGgttttagagctagaaatagcaagttaaaataag
3	NO01G00260	ccgggtccgattcccggtgcctgcaTACACACGTCAAGATTACTGgttttagagctagaaatagcaagttaaaataag
4	NO01G00270	ccgggtccgattcccggtgcctgcaGGGCATGTACAGCAGCACAGgttttagagctagaaatagcaagttaaaataag
5	NO01G00280	ccgggtccgattcccggtgcctgcaATATTCCCTATCGCTCCAGGgttttagagctagaaatagcaagttaaaataag
6	NO01G00290	ccgggtccgattcccggtgcctgcaGAAGCCCACTCCCTAAACCGgttttagagctagaaatagcaagttaaaataag
7	NO01G00310	ccgggtccgattcccggtgcctgcaCTCCTGGTTAGGGTCCTCGGgttttagagctagaaatagcaagttaaaataag
8	NO01G00300	ccgggtccgattcccggtgcctgcaGGGCAACAAAGGCAGTACGCgttttagagctagaaatagcaagttaaaataag
9	NO01G00320	ccgggtccgattcccggtgcctgcaTCACCACAATGACGGCATGGgttttagagctagaaatagcaagttaaaataag
10	NO01G00330	ccgggtccgattcccggtgcctgcaCCCGCGAGATGAACTCCAAGgttttagagctagaaatagcaagttaaaataag
11	NO01G00340	ccgggtccgattcccggtgcctgcaTCAAGTGTCAGCATGCACATgttttagagctagaaatagcaagttaaaataag
12	NO01G00360	ccgggtccgattcccggtgcctgcaCACGCCGAAGTACCGCCTGGgttttagagctagaaatagcaagttaaaataag
13	NO01G00370	ccgggtccgattcccggtgcctgcaTGGGAAGTTCATCACCACCAgttttagagctagaaatagcaagttaaaataag
14	NO01G00380	ccgggtccgattcccggtgcctgcaCTACAGTCACCAGTCAACAGgttttagagctagaaatagcaagttaaaataag
15	NO01G00390	ccgggtccgattcccggtgcctgcaGCAGTGCGACAAACACATGGgttttagagctagaaatagcaagttaaaataag
16	NO01G00400	ccgggtccgattcccggtgcctgcaGGAGGCAAGACCAGGCACCGgttttagagctagaaatagcaagttaaaataag
17	NO01G00410	ccgggtccgattcccggtgcctgcaTCCTACCAGAACGATGACAAgttttagagctagaaatagcaagttaaaataag
18	NO01G00420	ccgggtccgattcccggtgcctgcaACGGCCGAGTGCATAAAGGGgttttagagctagaaatagcaagttaaaataag
19	NO01G00430	ccgggtccgattcccggtgcctgcaCATCCGGGACAACAACCCTGgttttagagctagaaatagcaagttaaaataag
20	NO01G00440	ccgggtccgattcccggtgcctgcaCATTCCGGGTAGATACACCGgttttagagctagaaatagcaagttaaaataag
21	NO01G00450	ccgggtccgattcccggtgcctgcaCTTCCGAGCCGTCCGCAACGgttttagagctagaaatagcaagttaaaataag
22	NO01G00460	ccgggtccgattcccggtgcctgcaACGCGTGGGACATTCAACATgttttagagctagaaatagcaagttaaaataag
23	NO01G00470	ccgggtccgattcccggtgcctgcaGCTTCAAAACCCTCTACGAGgttttagagctagaaatagcaagttaaaataag
24	NO01G00480	ccgggtccgattcccggtgcctgcaGTAGGCGATTGGAACAACGAgttttagagctagaaatagcaagttaaaataag
25	NO01G00490	ccgggtccgattcccggtgcctgcaGACAACGTCCTCGGGCACAGgttttagagctagaaatagcaagttaaaataag
26	NO01G00510	ccgggtccgattcccggtgcctgcaGGACCATGAGAAGCTCATCAgttttagagctagaaatagcaagttaaaataag
27	NO01G00520	ccgggtccgattcccggtgcctgcaTCCCCTCAGGAGACACGTGGgttttagagctagaaatagcaagttaaaataag
28	NO01G00530	ccgggtccgattcccggtgcctgcaCAATCAATCCATCCGCCCTGgttttagagctagaaatagcaagttaaaataag
29	NO01G00540	ccgggtccgattcccggtgcctgcaGGAAAACCGAGATTGCTCGAgttttagagctagaaatagcaagttaaaataag
30	NO01G00550	ccgggtccgattcccggtgcctgcaTGATCGTGAGAGTAGGACAAgttttagagctagaaatagcaagttaaaataag
31	NO01G00560	ccgggtccgattcccggtgcctgcaAATCTCCAAAAAAGATGAGCgttttagagctagaaatagcaagttaaaataag
32	NO01G00570	ccgggtccgattcccggtgcctgcaACGACATCTGAACCCGTACAgttttagagctagaaatagcaagttaaaataag
33	NO01G00580	ccgggtccgattcccggtgcctgcaGAAATTGAAAAACTCCGCAAgttttagagctagaaatagcaagttaaaataag
34	NO01G00590	ccgggtccgattcccggtgcctgcaAAGGTGCCCTTATCGTCACTgttttagagctagaaatagcaagttaaaataag
35	NO01G00600	ccgggtccgattcccggtgcctgcaACTTGAGGAAGATCATAGGGgttttagagctagaaatagcaagttaaaataag
36	NO01G00610	ccgggtccgattcccggtgcctgcaCGTCGTAGATGGATGCACCGgttttagagctagaaatagcaagttaaaataag
37	NO01G00620	ccgggtccgattcccggtgcctgcaCACACCTTTCGAGAGCGGCAgttttagagctagaaatagcaagttaaaataag
38	NO01G00630	ccgggtccgattcccggtgcctgcaGTCCTCTTATTGCAGCACCGgttttagagctagaaatagcaagttaaaataag
39	NO01G00640	ccgggtccgattcccggtgcctgcaTGCATCTGGATGTACCAGTGgttttagagctagaaatagcaagttaaaataag
40	NO01G00650	ccgggtccgattcccggtgcctgcaGACGAGATTTGATGCCAGGTgttttagagctagaaatagcaagttaaaataag
41	NO01G00660	ccgggtccgattcccggtgcctgcaCTGATGCGTTGGAATGCCGTgttttagagctagaaatagcaagttaaaataag
42	NO01G00670	ccgggtccgattcccggtgcctgcaCTGGGAACGAAACGACACGAgttttagagctagaaatagcaagttaaaataag
43	NO01G00680	ccgggtccgattcccggtgcctgcaATGAGCCAAGAGTCGTCTGAgttttagagctagaaatagcaagttaaaataag
44	NO01G00700	ccgggtccgattcccggtgcctgcaCGTTTGCACGAGCAGCAGGAgttttagagctagaaatagcaagttaaaataag
45	NO01G00710	ccgggtccgattcccggtgcctgcaAAGGTCAAGGGTATCAACGGgttttagagctagaaatagcaagttaaaataag
46	NO01G00720	ccgggtccgattcccggtgcctgcaAAGTGGGAGTGCGACTGCTGgttttagagctagaaatagcaagttaaaataag
47	NO01G00740	ccgggtccgattcccggtgcctgcaAGGTTTCCCACTCAAAATCGgttttagagctagaaatagcaagttaaaataag
48	NO01G00750	ccgggtccgattcccggtgcctgcaATTGAGGCTATCAACAACGCgttttagagctagaaatagcaagttaaaataag
49	NO01G00760	ccgggtccgattcccggtgcctgcaCTACTATTAGGAGATCCTGGgttttagagctagaaatagcaagttaaaataag
50	NO01G00770	ccgggtccgattcccggtgcctgcaTCTTTCAAGACCGAGCCAGGgttttagagctagaaatagcaagttaaaataag
51	NO01G00780	ccgggtccgattcccggtgcctgcaACATGCGAAGACGACCCGAAgttttagagctagaaatagcaagttaaaataag
52	NO01G00790	ccgggtccgattcccggtgcctgcaATCTGGTTCTACTACCGACGgttttagagctagaaatagcaagttaaaataag
53	NO01G00810	ccgggtccgattcccggtgcctgcaGCTGCCCACAGCGATGACAGgttttagagctagaaatagcaagttaaaataag
54	NO01G00820	ccgggtccgattcccggtgcctgcaGTAGACCAAGCTGATCATCGgttttagagctagaaatagcaagttaaaataag
55	NO01G00830	ccgggtccgattcccggtgcctgcaATGGCTGATACCTTACAACGgttttagagctagaaatagcaagttaaaataag
56	NO01G00840	ccgggtccgattcccggtgcctgcaATCGGACATCTACGTCATCGgttttagagctagaaatagcaagttaaaataag
57	NO01G00850	ccgggtccgattcccggtgcctgcaAATGTGGGAGTACGTCAAGGgttttagagctagaaatagcaagttaaaataag
58	NO01G00860	ccgggtccgattcccggtgcctgcaCTACTGCTGAGGAGCCCAGGgttttagagctagaaatagcaagttaaaataag
59	NO01G00870	ccgggtccgattcccggtgcctgcaGCATCGATCAAATGCCATTGgttttagagctagaaatagcaagttaaaataag
60	NO01G00880	ccgggtccgattcccggtgcctgcaGAGGCTTACCAGTATCATTGgttttagagctagaaatagcaagttaaaataag
61	NO01G00890	ccgggtccgattcccggtgcctgcaTGTTCAAGACGCACAGCGAGgttttagagctagaaatagcaagttaaaataag
62	NO01G00900	ccgggtccgattcccggtgcctgcaACGCGTTGTACTGGTGACGGgttttagagctagaaatagcaagttaaaataag
63	NO01G00910	ccgggtccgattcccggtgcctgcaTTTACGTCGACGATGAAGCAgttttagagctagaaatagcaagttaaaataag
64	NO01G00920	ccgggtccgattcccggtgcctgcaGGCAGACATGGCTATCCCTGgttttagagctagaaatagcaagttaaaataag
65	NO01G00930	ccgggtccgattcccggtgcctgcaAATCCCCGAGCCCTTCACAGgttttagagctagaaatagcaagttaaaataag
66	NO01G00940	ccgggtccgattcccggtgcctgcaAGTCTGTCGGAAAGGCCAAGgttttagagctagaaatagcaagttaaaataag
67	NO01G00950	ccgggtccgattcccggtgcctgcaCATAGTACCTACCATCCCGGgttttagagctagaaatagcaagttaaaataag
68	NO01G00960	ccgggtccgattcccggtgcctgcaGATCATCAGACTTCTCCTCGgttttagagctagaaatagcaagttaaaataag
69	NO01G00970	ccgggtccgattcccggtgcctgcaCCCATTATTGCACAGCAGAGgttttagagctagaaatagcaagttaaaataag
70	NO01G00980	ccgggtccgattcccggtgcctgcaTATTGGACGAGTATCTACCGgttttagagctagaaatagcaagttaaaataag
71	NO01G00990	ccgggtccgattcccggtgcctgcaTACCGAATAATCTCGCATTGgttttagagctagaaatagcaagttaaaataag
72	NO01G01000	ccgggtccgattcccggtgcctgcaTTAGGAGTCCTGGAGCGACGgttttagagctagaaatagcaagttaaaataag
73	NO01G01010	ccgggtccgattcccggtgcctgcaCATAATCCCAACATGTGTCGgttttagagctagaaatagcaagttaaaataag
74	NO01G01020	ccgggtccgattcccggtgcctgcaAACCGCCTCCAGATGTACCGgttttagagctagaaatagcaagttaaaataag
75	NO01G01030	ccgggtccgattcccggtgcctgcaACAACATTAAGAACCACCGAgttttagagctagaaatagcaagttaaaataag
76	NO01G01040	ccgggtccgattcccggtgcctgcaGTGCAATATTAAAGAAAGCGgttttagagctagaaatagcaagttaaaataag
77	NO01G01050	ccgggtccgattcccggtgcctgcaGGCGGCGTGATATTTAAGAGgttttagagctagaaatagcaagttaaaataag
78	NO01G01060	ccgggtccgattcccggtgcctgcaCGTCTTCGATGTCAGCGGCGgttttagagctagaaatagcaagttaaaataag
79	NO01G01070	ccgggtccgattcccggtgcctgcaCTTCATGGATAAGGTCAGCGgttttagagctagaaatagcaagttaaaataag
80	NO01G01080	ccgggtccgattcccggtgcctgcaTGCGAGCGTGAGGATCTGTGgttttagagctagaaatagcaagttaaaataag
81	NO01G01090	ccgggtccgattcccggtgcctgcaCATCTCTTGACACATACGAGgttttagagctagaaatagcaagttaaaataag
82	NO01G01100	ccgggtccgattcccggtgcctgcaGACACCATGATTGCCAACGGgttttagagctagaaatagcaagttaaaataag
83	NO01G01110	ccgggtccgattcccggtgcctgcaGTTATTGGGATTGAAATGCGgttttagagctagaaatagcaagttaaaataag
84	NO01G01140	ccgggtccgattcccggtgcctgcaGAAGTCCGAGGGTTACCCGGgttttagagctagaaatagcaagttaaaataag
85	NO01G01150	ccgggtccgattcccggtgcctgcaGAGTGTATTTACGACCAGGGgttttagagctagaaatagcaagttaaaataag
86	NO01G01160	ccgggtccgattcccggtgcctgcaACACGCGAAGAAACGCACATgttttagagctagaaatagcaagttaaaataag
87	NO01G01170	ccgggtccgattcccggtgcctgcaGTACCTTCCAGGTGACACGGgttttagagctagaaatagcaagttaaaataag
88	NO01G01180	ccgggtccgattcccggtgcctgcaCTTGAGTGAGATGCGCCCCGgttttagagctagaaatagcaagttaaaataag
89	NO01G01190	ccgggtccgattcccggtgcctgcaCAAATGGAATTAGTTGACGTgttttagagctagaaatagcaagttaaaataag
90	NO01G01200	ccgggtccgattcccggtgcctgcaACTCAAAAGGAAACACGCAAgttttagagctagaaatagcaagttaaaataag
91	NO01G01210	ccgggtccgattcccggtgcctgcaATCAGAGTTCCTCACTACGAgttttagagctagaaatagcaagttaaaataag
92	NO01G01220	ccgggtccgattcccggtgcctgcaTTGTCGAGTGCAAGTGTTGGgttttagagctagaaatagcaagttaaaataag
93	NO01G01230	ccgggtccgattcccggtgcctgcaAGCATTGTGAACAAACCGAGgttttagagctagaaatagcaagttaaaataag
94	NO01G01240	ccgggtccgattcccggtgcctgcaGGCCAATATGTCTGTCAGAGgttttagagctagaaatagcaagttaaaataag
95	NO01G01250	ccgggtccgattcccggtgcctgcaGAGCAAGGCGAGGAATGCATgttttagagctagaaatagcaagttaaaataag
96	NO01G01260	ccgggtccgattcccggtgcctgcaCTTGCAATGCCTCCCCTCGGgttttagagctagaaatagcaagttaaaataag
97	NO01G01270	ccgggtccgattcccggtgcctgcaACGTCCAGATATCTTCCCTGgttttagagctagaaatagcaagttaaaataag
98	NO01G01280	ccgggtccgattcccggtgcctgcaGTTGTGCTGATATACGCCGTgttttagagctagaaatagcaagttaaaataag
99	NO01G01290	ccgggtccgattcccggtgcctgcaCTGGATGTACCATACGACAAgttttagagctagaaatagcaagttaaaataag
100	NO01G01300	ccgggtccgattcccggtgcctgcaCATGCACTGCAAAATATCAGgttttagagctagaaatagcaagttaaaataag
101	NO01G01310	ccgggtccgattcccggtgcctgcaGAATCCAAATCCCCCCGATGgttttagagctagaaatagcaagttaaaataag
102	NO01G01320	ccgggtccgattcccggtgcctgcaGGATACGAAGACATTTTACGgttttagagctagaaatagcaagttaaaataag
103	NO01G01330	ccgggtccgattcccggtgcctgcaAGTTCGCAAGGCCATCACCTgttttagagctagaaatagcaagttaaaataag
104	NO01G01340	ccgggtccgattcccggtgcctgcaGGATTCTCCCAACGTTCCAGgttttagagctagaaatagcaagttaaaataag
105	NO01G01350	ccgggtccgattcccggtgcctgcaGACGACAGTACCCTGCAGAGgttttagagctagaaatagcaagttaaaataag
106	NO01G01360	ccgggtccgattcccggtgcctgcaAAAGACCCCAGAGAACACCGgttttagagctagaaatagcaagttaaaataag
107	NO01G01370	ccgggtccgattcccggtgcctgcaGCTCGAGGTGATAAATCGTGgttttagagctagaaatagcaagttaaaataag
108	NO01G01380	ccgggtccgattcccggtgcctgcaCATCTGCAGCAATCACCGCAgttttagagctagaaatagcaagttaaaataag
109	NO01G01390	ccgggtccgattcccggtgcctgcaTCACTACAAATACCCCACGAgttttagagctagaaatagcaagttaaaataag
110	NO01G01400	ccgggtccgattcccggtgcctgcaATAGCCCAGACGTGGAAGTGgttttagagctagaaatagcaagttaaaataag
111	NO01G01410	ccgggtccgattcccggtgcctgcaAGCAAACGATCAGCTGACAAgttttagagctagaaatagcaagttaaaataag
112	NO01G01420	ccgggtccgattcccggtgcctgcaGCTGACGGTGCTGAACCCAGgttttagagctagaaatagcaagttaaaataag
113	NO01G01430	ccgggtccgattcccggtgcctgcaGTGGTGGTTGAAGCGCCCTGgttttagagctagaaatagcaagttaaaataag
114	NO01G01440	ccgggtccgattcccggtgcctgcaAGACGAGAGCAGTGACGACGgttttagagctagaaatagcaagttaaaataag
115	NO01G01450	ccgggtccgattcccggtgcctgcaCGAGCCACAAAATATGACAGgttttagagctagaaatagcaagttaaaataag
116	NO01G01460	ccgggtccgattcccggtgcctgcaTACCAAGATAGCGTACAGAGgttttagagctagaaatagcaagttaaaataag
117	NO01G01470	ccgggtccgattcccggtgcctgcaGGACTGTTTGATGAAAGACAgttttagagctagaaatagcaagttaaaataag
118	NO01G01480	ccgggtccgattcccggtgcctgcaAAGAGCTCCAAAACCCACGTgttttagagctagaaatagcaagttaaaataag
119	NO01G01490	ccgggtccgattcccggtgcctgcaACAGCTAAAACGATACCAGGgttttagagctagaaatagcaagttaaaataag
120	NO01G01500	ccgggtccgattcccggtgcctgcaAGACAGATCATGACGACCGGgttttagagctagaaatagcaagttaaaataag
121	NO01G01510	ccgggtccgattcccggtgcctgcaATTCCGAACAAAGTGCACAAgttttagagctagaaatagcaagttaaaataag
122	NO01G01520	ccgggtccgattcccggtgcctgcaCTCGGTCTACACCTTCACGGgttttagagctagaaatagcaagttaaaataag
123	NO01G01530	ccgggtccgattcccggtgcctgcaGATCCACTACATGTGTCGGGgttttagagctagaaatagcaagttaaaataag
124	NO01G01540	ccgggtccgattcccggtgcctgcaGTACTGCGAGACGATAAAGGgttttagagctagaaatagcaagttaaaataag
125	NO01G01550	ccgggtccgattcccggtgcctgcaTTCCTGGCCCATGAAAGAGGgttttagagctagaaatagcaagttaaaataag
126	NO01G01570	ccgggtccgattcccggtgcctgcaGGTCCTCGAACGAGTCACGGgttttagagctagaaatagcaagttaaaataag
127	NO01G01580	ccgggtccgattcccggtgcctgcaGCTGAGTACCTGAACCCTGGgttttagagctagaaatagcaagttaaaataag
128	NO01G01590	ccgggtccgattcccggtgcctgcaAGGGCGTAGGTGTCTCCTCGgttttagagctagaaatagcaagttaaaataag
129	NO01G01600	ccgggtccgattcccggtgcctgcaCTTCGCACAAGCATCAATCGgttttagagctagaaatagcaagttaaaataag
130	NO01G01610	ccgggtccgattcccggtgcctgcaGCTTACCCGACAGAGACGAAgttttagagctagaaatagcaagttaaaataag
131	NO01G01620	ccgggtccgattcccggtgcctgcaGGTATGCTTTATCGGCCACGgttttagagctagaaatagcaagttaaaataag
132	NO01G01630	ccgggtccgattcccggtgcctgcaCCAATGAAGTGAAATCACACgttttagagctagaaatagcaagttaaaataag
133	NO01G01640	ccgggtccgattcccggtgcctgcaGAGGCGTGTACGATCAACGTgttttagagctagaaatagcaagttaaaataag
134	NO01G01650	ccgggtccgattcccggtgcctgcaATTTCAACACGCACAAACACgttttagagctagaaatagcaagttaaaataag
135	NO01G01660	ccgggtccgattcccggtgcctgcaGGCACGCGAGAGAAACACCAgttttagagctagaaatagcaagttaaaataag
136	NO01G01670	ccgggtccgattcccggtgcctgcaCGTTGAGGTCCAATGCGCCGgttttagagctagaaatagcaagttaaaataag
137	NO01G01680	ccgggtccgattcccggtgcctgcaGCCCTGGAGCAAGTACTCAGgttttagagctagaaatagcaagttaaaataag
138	NO01G01690	ccgggtccgattcccggtgcctgcaATGGAGTTGCTAACCCACCAgttttagagctagaaatagcaagttaaaataag
139	NO01G01700	ccgggtccgattcccggtgcctgcaGTATGTGGCGCAAAACAAGGgttttagagctagaaatagcaagttaaaataag
140	NO01G01710	ccgggtccgattcccggtgcctgcaCTAAGACCGAGGCGGCAACGgttttagagctagaaatagcaagttaaaataag
141	NO01G01720	ccgggtccgattcccggtgcctgcaCCGCTTCAACCAGATACATGgttttagagctagaaatagcaagttaaaataag
142	NO01G01730	ccgggtccgattcccggtgcctgcaGCTGAGCTCGATAACAAAGGgttttagagctagaaatagcaagttaaaataag
143	NO01G01740	ccgggtccgattcccggtgcctgcaGTTTGCGACAAAGAGCATCAgttttagagctagaaatagcaagttaaaataag
144	NO01G01750	ccgggtccgattcccggtgcctgcaCGTATGCCAGAACACCTAGGgttttagagctagaaatagcaagttaaaataag
145	NO01G01760	ccgggtccgattcccggtgcctgcaCCCTGACGTCACCTACACTGgttttagagctagaaatagcaagttaaaataag
146	NO01G01770	ccgggtccgattcccggtgcctgcaTACCTTGCAAGACGACAGTGgttttagagctagaaatagcaagttaaaataag
147	NO01G01780	ccgggtccgattcccggtgcctgcaTACGTCTGGAAAAATGCGGGgttttagagctagaaatagcaagttaaaataag
148	NO01G01790	ccgggtccgattcccggtgcctgcaCGCAGTCGTCTTCTTCCGAGgttttagagctagaaatagcaagttaaaataag
149	NO01G01800	ccgggtccgattcccggtgcctgcaTTGTACGAATGCTATCAAGGgttttagagctagaaatagcaagttaaaataag
150	NO01G01810	ccgggtccgattcccggtgcctgcaGCTTGCCTTCCAAATCCATGgttttagagctagaaatagcaagttaaaataag
151	NO01G01820	ccgggtccgattcccggtgcctgcaACAGTACGATAGCTGCTACGgttttagagctagaaatagcaagttaaaataag
152	NO01G01830	ccgggtccgattcccggtgcctgcaAAAAAGGTCTTAGTGACGGGgttttagagctagaaatagcaagttaaaataag
153	NO01G01840	ccgggtccgattcccggtgcctgcaGACGAGTTAGGGTTGAACCAgttttagagctagaaatagcaagttaaaataag
154	NO01G01850	ccgggtccgattcccggtgcctgcaAGTGCCTGGAACACTACGAGgttttagagctagaaatagcaagttaaaataag
155	NO01G01860	ccgggtccgattcccggtgcctgcaGAGGACAACTTCCCGGCACGgttttagagctagaaatagcaagttaaaataag
156	NO01G01870	ccgggtccgattcccggtgcctgcaGTAATCAAAAATCACCTGTGgttttagagctagaaatagcaagttaaaataag
157	NO01G01880	ccgggtccgattcccggtgcctgcaGCTCCCTCTTGGTGACACTGgttttagagctagaaatagcaagttaaaataag
158	NO01G01890	ccgggtccgattcccggtgcctgcaACATGTGGATAAAATCAAGGgttttagagctagaaatagcaagttaaaataag
159	NO01G01900	ccgggtccgattcccggtgcctgcaAGAAGTGAATATCTTCTACGgttttagagctagaaatagcaagttaaaataag
160	NO01G01910	ccgggtccgattcccggtgcctgcaGCCCCAAGAGAGTCACATGAgttttagagctagaaatagcaagttaaaataag
161	NO01G01920	ccgggtccgattcccggtgcctgcaGCCCACCATGGCGAACACAGgttttagagctagaaatagcaagttaaaataag
162	NO01G01930	ccgggtccgattcccggtgcctgcaCCTCCATTATGAAGCTACGAgttttagagctagaaatagcaagttaaaataag
163	NO01G01940	ccgggtccgattcccggtgcctgcaGCATTGGTAATGGTGCGAAGgttttagagctagaaatagcaagttaaaataag
164	NO01G01950	ccgggtccgattcccggtgcctgcaTGGCGTACCTGACACCACGGgttttagagctagaaatagcaagttaaaataag
165	NO01G01960	ccgggtccgattcccggtgcctgcaGAATTACCAAGAAATGCACGgttttagagctagaaatagcaagttaaaataag
166	NO01G01970	ccgggtccgattcccggtgcctgcaACTGTGGAAGAAGATGAGCGgttttagagctagaaatagcaagttaaaataag
167	NO01G01980	ccgggtccgattcccggtgcctgcaTAAAGAGTACCAAGCATACGgttttagagctagaaatagcaagttaaaataag
168	NO01G01990	ccgggtccgattcccggtgcctgcaCGTACTCGACAAAAATCCAGgttttagagctagaaatagcaagttaaaataag
169	NO01G02000	ccgggtccgattcccggtgcctgcaGACAAAGCTGACAAACTCCGgttttagagctagaaatagcaagttaaaataag
170	NO01G02010	ccgggtccgattcccggtgcctgcaGCAGACCCATCACAACGAGGgttttagagctagaaatagcaagttaaaataag
171	NO01G02020	ccgggtccgattcccggtgcctgcaGTGGGCTCCATGACCAACGTgttttagagctagaaatagcaagttaaaataag
172	NO01G02030	ccgggtccgattcccggtgcctgcaCGAACCCCTACGAATCAAGGgttttagagctagaaatagcaagttaaaataag
173	NO01G02040	ccgggtccgattcccggtgcctgcaAGGATACAGTCTGAAGCCGGgttttagagctagaaatagcaagttaaaataag
174	NO01G02060	ccgggtccgattcccggtgcctgcaCATAAATCGACGTACCCCCGgttttagagctagaaatagcaagttaaaataag
175	NO01G02070	ccgggtccgattcccggtgcctgcaAGACTGCAAGAAACCCCTCAgttttagagctagaaatagcaagttaaaataag
176	NO01G02080	ccgggtccgattcccggtgcctgcaCACGGATGGTAAATGCCATGgttttagagctagaaatagcaagttaaaataag
177	NO01G02090	ccgggtccgattcccggtgcctgcaTCGACAACCTCAATGCAAGGgttttagagctagaaatagcaagttaaaataag
178	NO01G02100	ccgggtccgattcccggtgcctgcaGGCAGGCTGCTACCAAGAGGgttttagagctagaaatagcaagttaaaataag
179	NO01G02110	ccgggtccgattcccggtgcctgcaGCGAGCTCTTCCAAAAAACGgttttagagctagaaatagcaagttaaaataag
180	NO01G02120	ccgggtccgattcccggtgcctgcaTACAAAATCAGGACGCCCGGgttttagagctagaaatagcaagttaaaataag
181	NO01G02130	ccgggtccgattcccggtgcctgcaATCCGTGACCAAATGGACCCgttttagagctagaaatagcaagttaaaataag
182	NO01G02140	ccgggtccgattcccggtgcctgcaTGCCTGTTCATCAACAACGGgttttagagctagaaatagcaagttaaaataag
183	NO01G02150	ccgggtccgattcccggtgcctgcaGCATACAGTTATGTATCCCGgttttagagctagaaatagcaagttaaaataag
184	NO01G02160	ccgggtccgattcccggtgcctgcaCTGGTTGCCATTGTACAGCGgttttagagctagaaatagcaagttaaaataag
185	NO01G02170	ccgggtccgattcccggtgcctgcaGAACCATGTCTTGTTCCCTGgttttagagctagaaatagcaagttaaaataag
186	NO01G02180	ccgggtccgattcccggtgcctgcaCAGCACAAATGACCCCACCGgttttagagctagaaatagcaagttaaaataag
187	NO01G02190	ccgggtccgattcccggtgcctgcaTTTCTACACCTACAACAAGGgttttagagctagaaatagcaagttaaaataag
188	NO01G02200	ccgggtccgattcccggtgcctgcaACGAAGACATAATTTGCCCGgttttagagctagaaatagcaagttaaaataag
189	NO01G02210	ccgggtccgattcccggtgcctgcaCAGTTGGCACTCATGCACGAgttttagagctagaaatagcaagttaaaataag
190	NO01G02220	ccgggtccgattcccggtgcctgcaTCAATCGAGGAGCTCTACAGgttttagagctagaaatagcaagttaaaataag
191	NO01G02230	ccgggtccgattcccggtgcctgcaGGGTATCATGAACCGCACCAgttttagagctagaaatagcaagttaaaataag
192	NO01G02240	ccgggtccgattcccggtgcctgcaGATGGAAAAGTACCGCACCGgttttagagctagaaatagcaagttaaaataag
193	NO01G02250	ccgggtccgattcccggtgcctgcaTTCTAACTGGACCCATACCGgttttagagctagaaatagcaagttaaaataag
194	NO01G02260	ccgggtccgattcccggtgcctgcaAAGACGAACCCACGTCCTCGgttttagagctagaaatagcaagttaaaataag
195	NO01G02270	ccgggtccgattcccggtgcctgcaAAGCAAAATTGGCTGCACCAgttttagagctagaaatagcaagttaaaataag
196	NO01G02280	ccgggtccgattcccggtgcctgcaTCGCCTGCCAGTGTGCATGGgttttagagctagaaatagcaagttaaaataag
197	NO01G02290	ccgggtccgattcccggtgcctgcaGAACGTCGCACAATCCTCGGgttttagagctagaaatagcaagttaaaataag
198	NO01G02300	ccgggtccgattcccggtgcctgcaTGGGGCTCTGGCGAATGATGgttttagagctagaaatagcaagttaaaataag
199	NO01G02310	ccgggtccgattcccggtgcctgcaGACGACAAACTGATGTGCGAgttttagagctagaaatagcaagttaaaataag
200	NO01G02320	ccgggtccgattcccggtgcctgcaCGTTTGGGTCAGTGTTTGAGgttttagagctagaaatagcaagttaaaataag
201	NO01G02330	ccgggtccgattcccggtgcctgcaGCACTTCTTGACGAGGTGTGgttttagagctagaaatagcaagttaaaataag
202	NO01G02340	ccgggtccgattcccggtgcctgcaGGTTGGGACATGATGCACCGgttttagagctagaaatagcaagttaaaataag
203	NO01G02350	ccgggtccgattcccggtgcctgcaACCGTCAACATCGTCGCAAGgttttagagctagaaatagcaagttaaaataag
204	NO01G02360	ccgggtccgattcccggtgcctgcaCCTCCTCCTATACTGCAGAGgttttagagctagaaatagcaagttaaaataag
205	NO01G02370	ccgggtccgattcccggtgcctgcaAGGTACAACCGAATCCACAGgttttagagctagaaatagcaagttaaaataag
206	NO01G02380	ccgggtccgattcccggtgcctgcaCGTGTGCGTAGACTCCAACTgttttagagctagaaatagcaagttaaaataag
207	NO01G02390	ccgggtccgattcccggtgcctgcaGCCAGCACATCACCACCGGGgttttagagctagaaatagcaagttaaaataag
208	NO01G02400	ccgggtccgattcccggtgcctgcaAAAGGTTCAAGCTTCCTCAGgttttagagctagaaatagcaagttaaaataag
209	NO01G02410	ccgggtccgattcccggtgcctgcaGTCCTTAAAGGAGAAGCTTGgttttagagctagaaatagcaagttaaaataag
210	NO01G02420	ccgggtccgattcccggtgcctgcaAGACCTGTATATGCACCTCGgttttagagctagaaatagcaagttaaaataag
211	NO01G02430	ccgggtccgattcccggtgcctgcaCGGAGGTACAGGGCTCCACAgttttagagctagaaatagcaagttaaaataag
212	NO01G02440	ccgggtccgattcccggtgcctgcaCAGCCTGGAAGATGTTACACgttttagagctagaaatagcaagttaaaataag
213	NO01G02450	ccgggtccgattcccggtgcctgcaCGGCAAGCTAAGTTGCACAGgttttagagctagaaatagcaagttaaaataag
214	NO01G02480	ccgggtccgattcccggtgcctgcaCAACAAACCTAAAAGCACATgttttagagctagaaatagcaagttaaaataag
215	NO01G02490	ccgggtccgattcccggtgcctgcaTCATCGTAAAGTCTTTGGGGgttttagagctagaaatagcaagttaaaataag
216	NO01G02500	ccgggtccgattcccggtgcctgcaTGGCGATGTGTGGGTTGAGAgttttagagctagaaatagcaagttaaaataag
217	NO01G02510	ccgggtccgattcccggtgcctgcaCAGCCAAACCCAAGAACGCGgttttagagctagaaatagcaagttaaaataag
218	NO01G02520	ccgggtccgattcccggtgcctgcaGATCTCGTACAAGCTGAGCGgttttagagctagaaatagcaagttaaaataag
219	NO01G02530	ccgggtccgattcccggtgcctgcaGAAGCTGTTACAACGCCATGgttttagagctagaaatagcaagttaaaataag
220	NO01G02540	ccgggtccgattcccggtgcctgcaGGTTGCGAATGGACATACCGgttttagagctagaaatagcaagttaaaataag
221	NO01G02550	ccgggtccgattcccggtgcctgcaCCTTAGCAAGACACTTTGTGgttttagagctagaaatagcaagttaaaataag
222	NO01G02560	ccgggtccgattcccggtgcctgcaTAGTTGATCAGCGCTCGACGgttttagagctagaaatagcaagttaaaataag
223	NO01G02570	ccgggtccgattcccggtgcctgcaTTGGCGAACAGAGAGCGGGGgttttagagctagaaatagcaagttaaaataag
224	NO01G02580	ccgggtccgattcccggtgcctgcaCAGTAGCAACCTCACAACCAgttttagagctagaaatagcaagttaaaataag
225	NO01G02590	ccgggtccgattcccggtgcctgcaTTTCTCGCTACCCTACACCAgttttagagctagaaatagcaagttaaaataag
226	NO01G02600	ccgggtccgattcccggtgcctgcaGATGATTTGATGCCGTAGGGgttttagagctagaaatagcaagttaaaataag
227	NO01G02610	ccgggtccgattcccggtgcctgcaCTGCCAAAGAGCCACCCTGGgttttagagctagaaatagcaagttaaaataag
228	NO01G02620	ccgggtccgattcccggtgcctgcaCGACACGGCACAAAACAAGAgttttagagctagaaatagcaagttaaaataag
229	NO01G02630	ccgggtccgattcccggtgcctgcaCTGAAGTCTGGTATCACAGGgttttagagctagaaatagcaagttaaaataag
230	NO01G02640	ccgggtccgattcccggtgcctgcaACGCTAATCATGAAGCCCAGgttttagagctagaaatagcaagttaaaataag
231	NO01G02650	ccgggtccgattcccggtgcctgcaACTCCACGACAGATGCACTGgttttagagctagaaatagcaagttaaaataag
232	NO01G02660	ccgggtccgattcccggtgcctgcaAAAGTCTCCCTTCTCCACCGgttttagagctagaaatagcaagttaaaataag
233	NO01G02670	ccgggtccgattcccggtgcctgcaGCGCAAGGAACGAAGCACTGgttttagagctagaaatagcaagttaaaataag
234	NO01G02680	ccgggtccgattcccggtgcctgcaGGAAGTATACGTTAGCATCGgttttagagctagaaatagcaagttaaaataag
235	NO01G02690	ccgggtccgattcccggtgcctgcaAATTAAGAAACGATCCCAGGgttttagagctagaaatagcaagttaaaataag
236	NO01G02700	ccgggtccgattcccggtgcctgcaACGCCCGTAAGCACCCCGATgttttagagctagaaatagcaagttaaaataag
237	NO01G02710	ccgggtccgattcccggtgcctgcaTGATGGCAGAGGTACGACGAgttttagagctagaaatagcaagttaaaataag
238	NO01G02720	ccgggtccgattcccggtgcctgcaGATCTTTGTCGACATCGGCGgttttagagctagaaatagcaagttaaaataag
239	NO01G02730	ccgggtccgattcccggtgcctgcaGGAAATCGTTGACCTGAACGgttttagagctagaaatagcaagttaaaataag
240	NO01G02740	ccgggtccgattcccggtgcctgcaTGTCGGCGGTTAGAAAGACGgttttagagctagaaatagcaagttaaaataag
241	NO01G02750	ccgggtccgattcccggtgcctgcaCTTTCAGCAAAGCCAACTCGgttttagagctagaaatagcaagttaaaataag
242	NO01G02760	ccgggtccgattcccggtgcctgcaCCAATGTGAGGTACGCCCGGgttttagagctagaaatagcaagttaaaataag
243	NO01G02770	ccgggtccgattcccggtgcctgcaTGTCGGTCACCCAAAAAGCGgttttagagctagaaatagcaagttaaaataag
244	NO01G02780	ccgggtccgattcccggtgcctgcaACGCTCGTATCAGCACCAAGgttttagagctagaaatagcaagttaaaataag
245	NO01G02790	ccgggtccgattcccggtgcctgcaGAAAGGTCAAAACATATCGGgttttagagctagaaatagcaagttaaaataag
246	NO01G02800	ccgggtccgattcccggtgcctgcaTCAATGCTTTTCAAACCCAGgttttagagctagaaatagcaagttaaaataag
247	NO01G02820	ccgggtccgattcccggtgcctgcaTACGGACGAACCGATCGATGgttttagagctagaaatagcaagttaaaataag
248	NO01G02830	ccgggtccgattcccggtgcctgcaTCTTGGCGAGACGCACACGAgttttagagctagaaatagcaagttaaaataag
249	NO01G02840	ccgggtccgattcccggtgcctgcaCCCCTGGTAATCAACACGCGgttttagagctagaaatagcaagttaaaataag
250	NO01G02850	ccgggtccgattcccggtgcctgcaATTTGTGGAAAACCCCGACGgttttagagctagaaatagcaagttaaaataag
251	NO01G02860	ccgggtccgattcccggtgcctgcaATTCTGAATTCGGAGTACCGgttttagagctagaaatagcaagttaaaataag
252	NO01G02870	ccgggtccgattcccggtgcctgcaGCCGGGACATTACCACTGCGgttttagagctagaaatagcaagttaaaataag
253	NO01G02880	ccgggtccgattcccggtgcctgcaGAAATACAGAGACAGGCAGTgttttagagctagaaatagcaagttaaaataag
254	NO01G02890	ccgggtccgattcccggtgcctgcaGCATAAAGTAAGTATCCCTGgttttagagctagaaatagcaagttaaaataag
255	NO01G02900	ccgggtccgattcccggtgcctgcaAAGGGCATCGAGACACGTAGgttttagagctagaaatagcaagttaaaataag
256	NO01G02910	ccgggtccgattcccggtgcctgcaTACATGGAGACTGACATCCGgttttagagctagaaatagcaagttaaaataag
257	NO01G02920	ccgggtccgattcccggtgcctgcaAGGCAGACTACATCCACGCCgttttagagctagaaatagcaagttaaaataag
258	NO01G02930	ccgggtccgattcccggtgcctgcaTCGATCGTAATCTTGCCGGGgttttagagctagaaatagcaagttaaaataag
259	NO01G02940	ccgggtccgattcccggtgcctgcaCGGTTCGTCATCCTTCAGAGgttttagagctagaaatagcaagttaaaataag
260	NO01G02950	ccgggtccgattcccggtgcctgcaCTGGCTTGATTCCATAACGGgttttagagctagaaatagcaagttaaaataag
261	NO01G02960	ccgggtccgattcccggtgcctgcaAGACATAAATAATCTACCAGgttttagagctagaaatagcaagttaaaataag
262	NO01G02970	ccgggtccgattcccggtgcctgcaCACATCTCTCAATTACGCGAgttttagagctagaaatagcaagttaaaataag
263	NO01G02980	ccgggtccgattcccggtgcctgcaGAATGAATGTCACTTCAAGGgttttagagctagaaatagcaagttaaaataag
264	NO01G02990	ccgggtccgattcccggtgcctgcaTACTTTCAGGAGACCGAATGgttttagagctagaaatagcaagttaaaataag
265	NO01G03000	ccgggtccgattcccggtgcctgcaTGCAGCCCAAGGCTCGACGGgttttagagctagaaatagcaagttaaaataag
266	NO01G03010	ccgggtccgattcccggtgcctgcaCGAGGTCTTCAACCGTACGCgttttagagctagaaatagcaagttaaaataag
267	NO01G03020	ccgggtccgattcccggtgcctgcaTGAACACGCAGCTTACGAGAgttttagagctagaaatagcaagttaaaataag
268	NO01G03030	ccgggtccgattcccggtgcctgcaGGATTTATGTGACAGCAAGGgttttagagctagaaatagcaagttaaaataag
269	NO01G03040	ccgggtccgattcccggtgcctgcaCTATACACGATAGTGCCGGGgttttagagctagaaatagcaagttaaaataag
270	NO01G03050	ccgggtccgattcccggtgcctgcaGCCTCCTCTTCAAGACGACAgttttagagctagaaatagcaagttaaaataag
271	NO01G03060	ccgggtccgattcccggtgcctgcaGTCTTAGTGATAAGACACGAgttttagagctagaaatagcaagttaaaataag
272	NO01G03070	ccgggtccgattcccggtgcctgcaACACGTACATCACCAGAGTGgttttagagctagaaatagcaagttaaaataag
273	NO01G03080	ccgggtccgattcccggtgcctgcaGCACAGCCACGAGCAAACTGgttttagagctagaaatagcaagttaaaataag
274	NO01G03090	ccgggtccgattcccggtgcctgcaGGAAAACATAACGAGCTCGGgttttagagctagaaatagcaagttaaaataag
275	NO01G03100	ccgggtccgattcccggtgcctgcaACGCCAATGCAGTCTGACGTgttttagagctagaaatagcaagttaaaataag
276	NO01G03110	ccgggtccgattcccggtgcctgcaTTATGGAGGAAACAAGTACGgttttagagctagaaatagcaagttaaaataag
277	NO01G03120	ccgggtccgattcccggtgcctgcaGGTAGCGGAGGTATCGAACGgttttagagctagaaatagcaagttaaaataag
278	NO01G03130	ccgggtccgattcccggtgcctgcaTGTCTACCATGAAAGCGACGgttttagagctagaaatagcaagttaaaataag
279	NO01G03140	ccgggtccgattcccggtgcctgcaGAGGATCAGAAACATCAGTAgttttagagctagaaatagcaagttaaaataag
280	NO01G03150	ccgggtccgattcccggtgcctgcaGACGACAAAGTATCAAGAGGgttttagagctagaaatagcaagttaaaataag
281	NO01G03170	ccgggtccgattcccggtgcctgcaAATATATTCACCCAAACCGGgttttagagctagaaatagcaagttaaaataag
282	NO01G03180	ccgggtccgattcccggtgcctgcaGTAGGCATAGAGACCGTGCGgttttagagctagaaatagcaagttaaaataag
283	NO01G03190	ccgggtccgattcccggtgcctgcaTAGCTTTGACAACGTAGTGGgttttagagctagaaatagcaagttaaaataag
284	NO01G03200	ccgggtccgattcccggtgcctgcaCAACATGCAGAGGAGCAAAGgttttagagctagaaatagcaagttaaaataag
285	NO01G03210	ccgggtccgattcccggtgcctgcaGGTCGCAGAAAAGATTGTGGgttttagagctagaaatagcaagttaaaataag
286	NO01G03220	ccgggtccgattcccggtgcctgcaGATGAGAGGAAAAAGACCAGgttttagagctagaaatagcaagttaaaataag
287	NO01G03230	ccgggtccgattcccggtgcctgcaCGGGTGTGACCATGATCATGgttttagagctagaaatagcaagttaaaataag
288	NO01G03240	ccgggtccgattcccggtgcctgcaCATAACGTCTCGCTCTTGTGgttttagagctagaaatagcaagttaaaataag
289	NO01G03250	ccgggtccgattcccggtgcctgcaGAGCACTATCACGATTACGAgttttagagctagaaatagcaagttaaaataag
290	NO01G03260	ccgggtccgattcccggtgcctgcaAGAGTCAGCATGTGTCGTAGgttttagagctagaaatagcaagttaaaataag
291	NO01G03270	ccgggtccgattcccggtgcctgcaGTACTTGCCTCTGAACAAAGgttttagagctagaaatagcaagttaaaataag
292	NO01G03280	ccgggtccgattcccggtgcctgcaGGCAAGAGTTAGGAAATGCGgttttagagctagaaatagcaagttaaaataag
293	NO01G03290	ccgggtccgattcccggtgcctgcaGAGCTTTGTGCAATCCATCAgttttagagctagaaatagcaagttaaaataag
294	NO01G03300	ccgggtccgattcccggtgcctgcaACAAGGATGAGGATCGACGGgttttagagctagaaatagcaagttaaaataag
295	NO01G03310	ccgggtccgattcccggtgcctgcaGAAGTGATCGAGAACCTGAGgttttagagctagaaatagcaagttaaaataag
296	NO01G03320	ccgggtccgattcccggtgcctgcaCAGCATGAAAGAGATGACCAgttttagagctagaaatagcaagttaaaataag
297	NO01G03330	ccgggtccgattcccggtgcctgcaTGGGCTCTCAGTACGCCGGGgttttagagctagaaatagcaagttaaaataag
298	NO01G03340	ccgggtccgattcccggtgcctgcaGGTTGTGACCGAATCCATGGgttttagagctagaaatagcaagttaaaataag
299	NO01G03350	ccgggtccgattcccggtgcctgcaACCCGTCATGACACTTGCGAgttttagagctagaaatagcaagttaaaataag
300	NO01G03360	ccgggtccgattcccggtgcctgcaACATTGACAGAAATTGTGGAgttttagagctagaaatagcaagttaaaataag
301	NO01G03370	ccgggtccgattcccggtgcctgcaAGCCCAAAGGAGAAATGGGGgttttagagctagaaatagcaagttaaaataag
302	NO01G03380	ccgggtccgattcccggtgcctgcaGGTGTCATTGTGGATCGAGAgttttagagctagaaatagcaagttaaaataag
303	NO01G03390	ccgggtccgattcccggtgcctgcaGCATAGGAATGTCCTGCAGGgttttagagctagaaatagcaagttaaaataag
304	NO01G03400	ccgggtccgattcccggtgcctgcaTCCGGATCACAAGTACAAGGgttttagagctagaaatagcaagttaaaataag
305	NO01G03410	ccgggtccgattcccggtgcctgcaGTCGTGTAAAGGGAGTGGGTgttttagagctagaaatagcaagttaaaataag
306	NO01G03420	ccgggtccgattcccggtgcctgcaGGAAAGCTTGAACGTCAACGgttttagagctagaaatagcaagttaaaataag
307	NO01G03430	ccgggtccgattcccggtgcctgcaACAACAGTCTGCCTACATGAgttttagagctagaaatagcaagttaaaataag
308	NO01G03440	ccgggtccgattcccggtgcctgcaGCGAAGCTCAAAGGGCACGTgttttagagctagaaatagcaagttaaaataag
309	NO01G03450	ccgggtccgattcccggtgcctgcaTCTAGCAGTAATACACCCGGgttttagagctagaaatagcaagttaaaataag
310	NO01G03460	ccgggtccgattcccggtgcctgcaTTCACACAGATATCCACTGGgttttagagctagaaatagcaagttaaaataag
311	NO01G03470	ccgggtccgattcccggtgcctgcaAGAAGAGATCAGGAACTGTGgttttagagctagaaatagcaagttaaaataag
312	NO01G03480	ccgggtccgattcccggtgcctgcaACCTACCGTCTCACTCACATgttttagagctagaaatagcaagttaaaataag
313	NO01G03490	ccgggtccgattcccggtgcctgcaACAAAGGGAGCAAACCTTCGgttttagagctagaaatagcaagttaaaataag
314	NO01G03500	ccgggtccgattcccggtgcctgcaCATCGTCGAGAACTCCGGCGgttttagagctagaaatagcaagttaaaataag
315	NO01G03510	ccgggtccgattcccggtgcctgcaTATCATCTTAACGTCGGCCAgttttagagctagaaatagcaagttaaaataag
316	NO01G03520	ccgggtccgattcccggtgcctgcaAGTAGGCTTTGGTGTCCGAGgttttagagctagaaatagcaagttaaaataag
317	NO01G03530	ccgggtccgattcccggtgcctgcaAGGAAGGTTTAATTACCCCGgttttagagctagaaatagcaagttaaaataag
318	NO01G03540	ccgggtccgattcccggtgcctgcaTTTCAGGGAGAAACGACCCAgttttagagctagaaatagcaagttaaaataag
319	NO01G03550	ccgggtccgattcccggtgcctgcaTATTGTTACCCTCACCACCGgttttagagctagaaatagcaagttaaaataag
320	NO01G03560	ccgggtccgattcccggtgcctgcaATAGAGAGGGATAAGCCCGGgttttagagctagaaatagcaagttaaaataag
321	NO01G03570	ccgggtccgattcccggtgcctgcaGCGTGGTCGAGCAAACACAAgttttagagctagaaatagcaagttaaaataag
322	NO01G03580	ccgggtccgattcccggtgcctgcaAAGGCTACCCATAAGCAGAGgttttagagctagaaatagcaagttaaaataag
323	NO01G03590	ccgggtccgattcccggtgcctgcaATACAGCAAAGAGAAGCTTGgttttagagctagaaatagcaagttaaaataag
324	NO01G03600	ccgggtccgattcccggtgcctgcaGGCACTACTTCAAGGGTGTGgttttagagctagaaatagcaagttaaaataag
325	NO01G03610	ccgggtccgattcccggtgcctgcaAAAAGTAATCACGTGAAGAGgttttagagctagaaatagcaagttaaaataag
326	NO01G03620	ccgggtccgattcccggtgcctgcaTCGAGTCAATTTATGCAAGGgttttagagctagaaatagcaagttaaaataag
327	NO01G03630	ccgggtccgattcccggtgcctgcaTAGACCGAAAGAGGGCGTCGgttttagagctagaaatagcaagttaaaataag
328	NO01G03640	ccgggtccgattcccggtgcctgcaCATCTCAGAGATCCAGCCGTgttttagagctagaaatagcaagttaaaataag
329	NO01G03650	ccgggtccgattcccggtgcctgcaGACATCCAACGGGTAGAGGGgttttagagctagaaatagcaagttaaaataag
330	NO01G03660	ccgggtccgattcccggtgcctgcaACGCGCGTGTCCTAACAATGgttttagagctagaaatagcaagttaaaataag
331	NO01G03670	ccgggtccgattcccggtgcctgcaATATATGATTCGAGGCCCCGgttttagagctagaaatagcaagttaaaataag
332	NO01G03680	ccgggtccgattcccggtgcctgcaGGAATGGCAAAAACTCGCAGgttttagagctagaaatagcaagttaaaataag
333	NO01G03690	ccgggtccgattcccggtgcctgcaCGACGACATAAGTGACATTGgttttagagctagaaatagcaagttaaaataag
334	NO01G03700	ccgggtccgattcccggtgcctgcaAAGCGCTTGCAAGAACACACgttttagagctagaaatagcaagttaaaataag
335	NO01G03710	ccgggtccgattcccggtgcctgcaTGATCAACCCAATGCCAACGgttttagagctagaaatagcaagttaaaataag
336	NO01G03720	ccgggtccgattcccggtgcctgcaTCGGCCAGCTCTACTACCGGgttttagagctagaaatagcaagttaaaataag
337	NO01G03740	ccgggtccgattcccggtgcctgcaGTGCTATACGACCTGCCCAGgttttagagctagaaatagcaagttaaaataag
338	NO01G03730	ccgggtccgattcccggtgcctgcaTGGCGCCACATGTACGACCGgttttagagctagaaatagcaagttaaaataag
339	NO01G03750	ccgggtccgattcccggtgcctgcaTTCCTAATCGAGCAACCCCAgttttagagctagaaatagcaagttaaaataag
340	NO01G03760	ccgggtccgattcccggtgcctgcaTGAAGGCGTACCACGCACAGgttttagagctagaaatagcaagttaaaataag
341	NO01G03770	ccgggtccgattcccggtgcctgcaTCATGGCGCTAATATTAACGgttttagagctagaaatagcaagttaaaataag
342	NO01G03780	ccgggtccgattcccggtgcctgcaCTGGGCGTTAAGTACAACGGgttttagagctagaaatagcaagttaaaataag
343	NO01G03790	ccgggtccgattcccggtgcctgcaCCAAATTAAAGTGACAACCGgttttagagctagaaatagcaagttaaaataag
344	NO01G03800	ccgggtccgattcccggtgcctgcaAATTGTGGGGCAAAACCCGGgttttagagctagaaatagcaagttaaaataag
345	NO01G03810	ccgggtccgattcccggtgcctgcaAGATCCCTATTAAGGCAGGGgttttagagctagaaatagcaagttaaaataag
346	NO01G03820	ccgggtccgattcccggtgcctgcaCGACATTCTTGTACGCGTAGgttttagagctagaaatagcaagttaaaataag
347	NO01G03830	ccgggtccgattcccggtgcctgcaTAAGACGGCGTGGTCTTCCAgttttagagctagaaatagcaagttaaaataag
348	NO01G03840	ccgggtccgattcccggtgcctgcaCAAATCAGTGACATGCACGAgttttagagctagaaatagcaagttaaaataag
349	NO01G03860	ccgggtccgattcccggtgcctgcaAATGGCGCCCGAAAACACAGgttttagagctagaaatagcaagttaaaataag
350	NO01G03870	ccgggtccgattcccggtgcctgcaACGTAGGGCACTTAGGACAGgttttagagctagaaatagcaagttaaaataag
351	NO01G03880	ccgggtccgattcccggtgcctgcaGGTGTGCTTCGTGTCCATGGgttttagagctagaaatagcaagttaaaataag
352	NO01G03890	ccgggtccgattcccggtgcctgcaGAGGTTTGATGATGACCACGgttttagagctagaaatagcaagttaaaataag
353	NO01G03900	ccgggtccgattcccggtgcctgcaCAGGCGAAAGGTGATGTTGGgttttagagctagaaatagcaagttaaaataag
354	NO01G03910	ccgggtccgattcccggtgcctgcaTTGCCCCATGAGTAGCTCGGgttttagagctagaaatagcaagttaaaataag
355	NO01G03920	ccgggtccgattcccggtgcctgcaTATGATGTGCGAAAAGGTGAgttttagagctagaaatagcaagttaaaataag
356	NO01G03930	ccgggtccgattcccggtgcctgcaTACATCTTGCAATATCAGGGgttttagagctagaaatagcaagttaaaataag
357	NO01G03940	ccgggtccgattcccggtgcctgcaTGCGGCTCATGTACACAATGgttttagagctagaaatagcaagttaaaataag
358	NO01G03950	ccgggtccgattcccggtgcctgcaACTAGAGGAGATGACAGCAGgttttagagctagaaatagcaagttaaaataag
359	NO01G03960	ccgggtccgattcccggtgcctgcaACTCATAAAGTACATCTGGGgttttagagctagaaatagcaagttaaaataag
360	NO01G03970	ccgggtccgattcccggtgcctgcaATACGACTCTGTGTATAACGgttttagagctagaaatagcaagttaaaataag
361	NO01G03980	ccgggtccgattcccggtgcctgcaGCAGTAAATAGAGATGACAGgttttagagctagaaatagcaagttaaaataag
362	NO01G03990	ccgggtccgattcccggtgcctgcaTCGTTAGCGATGATGCCCAGgttttagagctagaaatagcaagttaaaataag
363	NO01G04000	ccgggtccgattcccggtgcctgcaTCCCGGCGTGAAGACCACGAgttttagagctagaaatagcaagttaaaataag
364	NO01G04010	ccgggtccgattcccggtgcctgcaTTGTGAGTGAGGATGAGTTGgttttagagctagaaatagcaagttaaaataag
365	NO01G04020	ccgggtccgattcccggtgcctgcaCAAGATCGATGAATACAGAGgttttagagctagaaatagcaagttaaaataag
366	NO01G04030	ccgggtccgattcccggtgcctgcaCTTTCAACAACAACCCCCGGgttttagagctagaaatagcaagttaaaataag
367	NO01G04040	ccgggtccgattcccggtgcctgcaCGCTCAGCAAATCTGCCACGgttttagagctagaaatagcaagttaaaataag
368	NO01G04050	ccgggtccgattcccggtgcctgcaTTTTGGCGTTCACATCCACGgttttagagctagaaatagcaagttaaaataag
369	NO01G04060	ccgggtccgattcccggtgcctgcaATGCTGGTAAGTGCTGTCTGgttttagagctagaaatagcaagttaaaataag
370	NO01G04070	ccgggtccgattcccggtgcctgcaGTGGATTTCAAGCAATCCGAgttttagagctagaaatagcaagttaaaataag
371	NO01G04080	ccgggtccgattcccggtgcctgcaGTCCCTTGTCTTCAACACAAgttttagagctagaaatagcaagttaaaataag
372	NO01G04090	ccgggtccgattcccggtgcctgcaGTGTCTGACAATCTCCCCCGgttttagagctagaaatagcaagttaaaataag
373	NO01G04100	ccgggtccgattcccggtgcctgcaTCTGGTTCGATCGACAGACGgttttagagctagaaatagcaagttaaaataag
374	NO01G04110	ccgggtccgattcccggtgcctgcaTAGTAAGTGGATCATGACGAgttttagagctagaaatagcaagttaaaataag
375	NO01G04120	ccgggtccgattcccggtgcctgcaCGAAGGCGGATATCAACAGGgttttagagctagaaatagcaagttaaaataag
376	NO01G04130	ccgggtccgattcccggtgcctgcaGGGCTACGATGCAAGCGACGgttttagagctagaaatagcaagttaaaataag
377	NO01G04140	ccgggtccgattcccggtgcctgcaCCAATCGTGTTGCTCAACCAgttttagagctagaaatagcaagttaaaataag
378	NO01G04150	ccgggtccgattcccggtgcctgcaTTCTCCGGGTGGAAAAAACGgttttagagctagaaatagcaagttaaaataag
379	NO01G04160	ccgggtccgattcccggtgcctgcaATGGCTCAGGATCCCAACTGgttttagagctagaaatagcaagttaaaataag
380	NO01G04170	ccgggtccgattcccggtgcctgcaGAATACTCCCTCCCTACCGTgttttagagctagaaatagcaagttaaaataag
381	NO01G04180	ccgggtccgattcccggtgcctgcaAAGACGAGGAGGCTTCATGCgttttagagctagaaatagcaagttaaaataag
382	NO01G04190	ccgggtccgattcccggtgcctgcaTCACCTACGACAATTCCGAGgttttagagctagaaatagcaagttaaaataag
383	NO01G04200	ccgggtccgattcccggtgcctgcaGATTGAGGGATTATCGACAGgttttagagctagaaatagcaagttaaaataag
384	NO01G04210	ccgggtccgattcccggtgcctgcaCATATACCTGACCGACCCGGgttttagagctagaaatagcaagttaaaataag
385	NO01G04220	ccgggtccgattcccggtgcctgcaCATGATCACTGCCATGACAAgttttagagctagaaatagcaagttaaaataag
386	NO01G04230	ccgggtccgattcccggtgcctgcaTTTCGACAGAGTAGTAACCGgttttagagctagaaatagcaagttaaaataag
387	NO01G04240	ccgggtccgattcccggtgcctgcaGACCCGACGAACTATGCCAGgttttagagctagaaatagcaagttaaaataag
388	NO01G04250	ccgggtccgattcccggtgcctgcaATCTATCAGTAAATGCCCGGgttttagagctagaaatagcaagttaaaataag
389	NO01G04260	ccgggtccgattcccggtgcctgcaTTTTATCTGTGACCGCGCAGgttttagagctagaaatagcaagttaaaataag
390	NO01G04270	ccgggtccgattcccggtgcctgcaTTGATCCAAGGGGATAGATGgttttagagctagaaatagcaagttaaaataag
391	NO01G04280	ccgggtccgattcccggtgcctgcaCGCGGGAAGAGATATCCCAGgttttagagctagaaatagcaagttaaaataag
392	NO01G04290	ccgggtccgattcccggtgcctgcaATGGGATGGGCAATCACGAGgttttagagctagaaatagcaagttaaaataag
393	NO01G04300	ccgggtccgattcccggtgcctgcaCAATAAATGGAGAATGTGTGgttttagagctagaaatagcaagttaaaataag
394	NO01G04310	ccgggtccgattcccggtgcctgcaCACACCACAAGTATTCCCCAgttttagagctagaaatagcaagttaaaataag
395	NO01G04330	ccgggtccgattcccggtgcctgcaTGCCCCCAAAGGTTACCTCGgttttagagctagaaatagcaagttaaaataag
396	NO01G04340	ccgggtccgattcccggtgcctgcaTTTCTCCAACAACACCGCCAgttttagagctagaaatagcaagttaaaataag
397	NO01G04350	ccgggtccgattcccggtgcctgcaTGGTGCTGAGATCTCGACATgttttagagctagaaatagcaagttaaaataag
398	NO01G04360	ccgggtccgattcccggtgcctgcaGTAGGGGTGCGATATAACGAgttttagagctagaaatagcaagttaaaataag
399	NO01G04370	ccgggtccgattcccggtgcctgcaTGAGTGGGCCATAATGCATGgttttagagctagaaatagcaagttaaaataag
400	NO01G04380	ccgggtccgattcccggtgcctgcaGGGCGACACATTTCCCAACGgttttagagctagaaatagcaagttaaaataag
401	NO01G04390	ccgggtccgattcccggtgcctgcaACCTGCCCGCATAGACGTAGgttttagagctagaaatagcaagttaaaataag
402	NO01G04400	ccgggtccgattcccggtgcctgcaAAAGAGCTGGAAGAAACCTGgttttagagctagaaatagcaagttaaaataag
403	NO01G04410	ccgggtccgattcccggtgcctgcaGCAATTTCGAACTTGGTCAAgttttagagctagaaatagcaagttaaaataag
404	NO01G04420	ccgggtccgattcccggtgcctgcaAAAATAATGAAGGAGACCGAgttttagagctagaaatagcaagttaaaataag
405	NO01G04430	ccgggtccgattcccggtgcctgcaTGACCCTTCACAGGACCCAGgttttagagctagaaatagcaagttaaaataag
406	NO01G04440	ccgggtccgattcccggtgcctgcaTGAGCTCTGCTGTCACCACGgttttagagctagaaatagcaagttaaaataag
407	NO01G04450	ccgggtccgattcccggtgcctgcaTCTATACTTCTTAAACGACAgttttagagctagaaatagcaagttaaaataag
408	NO01G04460	ccgggtccgattcccggtgcctgcaGCTCAAAACCGTATGGAACGgttttagagctagaaatagcaagttaaaataag
409	NO01G04470	ccgggtccgattcccggtgcctgcaTCCTGCTTATGAGAACGAGGgttttagagctagaaatagcaagttaaaataag
410	NO01G04480	ccgggtccgattcccggtgcctgcaCATTGAAGGAGAGAAAGGTGgttttagagctagaaatagcaagttaaaataag
411	NO01G04490	ccgggtccgattcccggtgcctgcaTCTACGGGCGAGATCTTGTGgttttagagctagaaatagcaagttaaaataag
412	NO01G04500	ccgggtccgattcccggtgcctgcaGTGCCTATGAAGCATCGCTGgttttagagctagaaatagcaagttaaaataag
413	NO01G04510	ccgggtccgattcccggtgcctgcaGCTGGCAGAAGATATCACCGgttttagagctagaaatagcaagttaaaataag
414	NO01G04520	ccgggtccgattcccggtgcctgcaTTACTCATCCATGCACAGGGgttttagagctagaaatagcaagttaaaataag
415	NO01G04530	ccgggtccgattcccggtgcctgcaAGAAGAGGATGTATACATGAgttttagagctagaaatagcaagttaaaataag
416	NO01G04540	ccgggtccgattcccggtgcctgcaCGAAGGAGATGACCACAAGGgttttagagctagaaatagcaagttaaaataag
417	NO01G04550	ccgggtccgattcccggtgcctgcaCATCGAGCAAGATACCGAGGgttttagagctagaaatagcaagttaaaataag
418	NO01G04570	ccgggtccgattcccggtgcctgcaCAATACCAACATCGGCACCAgttttagagctagaaatagcaagttaaaataag
419	NO01G04560	ccgggtccgattcccggtgcctgcaGCCGAGCGGTCTCTTTCGCGgttttagagctagaaatagcaagttaaaataag
420	NO01G04580	ccgggtccgattcccggtgcctgcaCCAGGCGTGACCTTGCCAGGgttttagagctagaaatagcaagttaaaataag
421	NO01G04590	ccgggtccgattcccggtgcctgcaCGAGGGACAAGTGAACGAGAgttttagagctagaaatagcaagttaaaataag
422	NO01G04600	ccgggtccgattcccggtgcctgcaCCACAGCAAGAAAACCACAGgttttagagctagaaatagcaagttaaaataag
423	NO01G04620	ccgggtccgattcccggtgcctgcaGGTGGTCTCGAAGCTTGTTGgttttagagctagaaatagcaagttaaaataag
424	NO01G04630	ccgggtccgattcccggtgcctgcaTAATGGGAGAGAAACACTGGgttttagagctagaaatagcaagttaaaataag
425	NO01G04640	ccgggtccgattcccggtgcctgcaCTGACCATCAACCGTCTCTGgttttagagctagaaatagcaagttaaaataag
426	NO01G04650	ccgggtccgattcccggtgcctgcaATCCCGGAACAATGCCACCAgttttagagctagaaatagcaagttaaaataag
427	NO01G04660	ccgggtccgattcccggtgcctgcaCTTCCAACAGTTGTTCCCTGgttttagagctagaaatagcaagttaaaataag
428	NO01G04670	ccgggtccgattcccggtgcctgcaGCTTGTAGATGAAGTCTGTGgttttagagctagaaatagcaagttaaaataag
429	NO01G04680	ccgggtccgattcccggtgcctgcaGGGCCACTCCGAGAAAACCGgttttagagctagaaatagcaagttaaaataag
430	NO01G04690	ccgggtccgattcccggtgcctgcaAAGTTTCGTACCAACAAGGGgttttagagctagaaatagcaagttaaaataag
431	NO01G04700	ccgggtccgattcccggtgcctgcaTAGCCCAAGGATACCTACGTgttttagagctagaaatagcaagttaaaataag
432	NO01G04710	ccgggtccgattcccggtgcctgcaTCCAGGATAAGAGTACTGCGgttttagagctagaaatagcaagttaaaataag
433	NO01G04720	ccgggtccgattcccggtgcctgcaGAATCTGGTATTGAGAGGCGgttttagagctagaaatagcaagttaaaataag
434	NO01G04730	ccgggtccgattcccggtgcctgcaTGAAGGAAGATGCAGAACGTgttttagagctagaaatagcaagttaaaataag
435	NO01G04740	ccgggtccgattcccggtgcctgcaGTGCACTTGGATATACAGCGgttttagagctagaaatagcaagttaaaataag
436	NO01G04750	ccgggtccgattcccggtgcctgcaTATCTACTTACTATTATCCGgttttagagctagaaatagcaagttaaaataag
437	NO01G04760	ccgggtccgattcccggtgcctgcaCTGCATCTCCAAGATCTACGgttttagagctagaaatagcaagttaaaataag
438	NO01G04770	ccgggtccgattcccggtgcctgcaTTCCTTGGTGGAGATGAGCGgttttagagctagaaatagcaagttaaaataag
439	NO01G04790	ccgggtccgattcccggtgcctgcaAATTGTCAAAACCCGCACCGgttttagagctagaaatagcaagttaaaataag
440	NO01G04780	ccgggtccgattcccggtgcctgcaTGAGAGTTCGAAAATTCAGGgttttagagctagaaatagcaagttaaaataag
441	NO01G04800	ccgggtccgattcccggtgcctgcaGAGTGCGTGTCCAGAAACTGgttttagagctagaaatagcaagttaaaataag
442	NO01G04810	ccgggtccgattcccggtgcctgcaATGTGTACACCGTCCCCCTGgttttagagctagaaatagcaagttaaaataag
443	NO01G04820	ccgggtccgattcccggtgcctgcaTCGAAGACGGCCCAAGACAAgttttagagctagaaatagcaagttaaaataag
444	NO01G04830	ccgggtccgattcccggtgcctgcaCCGAACCATTCGAGTGCCGGgttttagagctagaaatagcaagttaaaataag
445	NO01G04840	ccgggtccgattcccggtgcctgcaGTACCAGCGATCCCCCAACAgttttagagctagaaatagcaagttaaaataag
446	NO01G04850	ccgggtccgattcccggtgcctgcaGCCCAGGAAACGAGGCACAGgttttagagctagaaatagcaagttaaaataag
447	NO01G04860	ccgggtccgattcccggtgcctgcaTGGCTTGATGACCATGCGAGgttttagagctagaaatagcaagttaaaataag
448	NO01G04870	ccgggtccgattcccggtgcctgcaGCTTCGTTCGTAGGACAAAGgttttagagctagaaatagcaagttaaaataag
449	NO01G04880	ccgggtccgattcccggtgcctgcaCAGTGACGAAGAGATGTTTGgttttagagctagaaatagcaagttaaaataag
450	NO01G04890	ccgggtccgattcccggtgcctgcaGTTCCATCGAGAGCACGTAGgttttagagctagaaatagcaagttaaaataag
451	NO01G04900	ccgggtccgattcccggtgcctgcaGGTACAAGGAAGTTGTGACGgttttagagctagaaatagcaagttaaaataag
452	NO01G04910	ccgggtccgattcccggtgcctgcaGATGCAGCGTGAACTTGAGGgttttagagctagaaatagcaagttaaaataag
453	NO01G04920	ccgggtccgattcccggtgcctgcaGGATGCGATTGAGAGTCGAGgttttagagctagaaatagcaagttaaaataag
454	NO01G04930	ccgggtccgattcccggtgcctgcaGCAGACAGTCTCATCGTAGGgttttagagctagaaatagcaagttaaaataag
455	NO01G04940	ccgggtccgattcccggtgcctgcaTACAATCTTCTCAACCGACGgttttagagctagaaatagcaagttaaaataag
456	NO01G04950	ccgggtccgattcccggtgcctgcaCGACCCCTTTAATCCCACAGgttttagagctagaaatagcaagttaaaataag
457	NO01G04970	ccgggtccgattcccggtgcctgcaTGAATCGAGAGAAAAAATGAgttttagagctagaaatagcaagttaaaataag
458	NO01G04980	ccgggtccgattcccggtgcctgcaGCGCAGAACCAGGTGCAATGgttttagagctagaaatagcaagttaaaataag
459	NO01G04990	ccgggtccgattcccggtgcctgcaAATTGCGGCCGAGAACATTGgttttagagctagaaatagcaagttaaaataag
460	NO01G05000	ccgggtccgattcccggtgcctgcaTATGACTGTTATGTGCCCATgttttagagctagaaatagcaagttaaaataag
461	NO01G05010	ccgggtccgattcccggtgcctgcaACCACCGTGACTGCACACAGgttttagagctagaaatagcaagttaaaataag
462	NO01G05020	ccgggtccgattcccggtgcctgcaGGTTCTGCTCCGGGTCCCAGgttttagagctagaaatagcaagttaaaataag
463	NO01G05030	ccgggtccgattcccggtgcctgcaTGAATAGGTCCTCTTCTGTAgttttagagctagaaatagcaagttaaaataag
464	NO01G05040	ccgggtccgattcccggtgcctgcaACCGACATGCCCCAGCACAAgttttagagctagaaatagcaagttaaaataag
465	NO01G05050	ccgggtccgattcccggtgcctgcaGACACGCATAGGCCACACCGgttttagagctagaaatagcaagttaaaataag
466	NO01G05060	ccgggtccgattcccggtgcctgcaGTTGCCTCTTACCCCACCCAgttttagagctagaaatagcaagttaaaataag
467	NO01G05070	ccgggtccgattcccggtgcctgcaTGTGATGGTGTCCCTGACTGgttttagagctagaaatagcaagttaaaataag
468	NO01G05080	ccgggtccgattcccggtgcctgcaGTGGCGGTGATAAATTACGAgttttagagctagaaatagcaagttaaaataag
469	NO01G05090	ccgggtccgattcccggtgcctgcaAATGCGACGATACTGCCAAGgttttagagctagaaatagcaagttaaaataag
470	NO01G05100	ccgggtccgattcccggtgcctgcaTGAAGAGGTTAGTGGATCGGgttttagagctagaaatagcaagttaaaataag
471	NO01G05110	ccgggtccgattcccggtgcctgcaCTGAGCTTCGAGACCGAGGGgttttagagctagaaatagcaagttaaaataag
472	NO01G05120	ccgggtccgattcccggtgcctgcaGTAAAGACAGACGAGCCCAAgttttagagctagaaatagcaagttaaaataag
473	NO01G05130	ccgggtccgattcccggtgcctgcaCCCAGGTGTAAAGAACCCGTgttttagagctagaaatagcaagttaaaataag
474	NO01G05140	ccgggtccgattcccggtgcctgcaCTTTCCCGATGGCAGCATGGgttttagagctagaaatagcaagttaaaataag
475	NO01G05150	ccgggtccgattcccggtgcctgcaAACCAGAAACAAGGACACCGgttttagagctagaaatagcaagttaaaataag
476	NO01G05160	ccgggtccgattcccggtgcctgcaAGGACGCCCTGCGGGCAAGAgttttagagctagaaatagcaagttaaaataag
477	NO01G05170	ccgggtccgattcccggtgcctgcaGTTGGTTGTGAGCTCCCGCGgttttagagctagaaatagcaagttaaaataag
478	NO01G05180	ccgggtccgattcccggtgcctgcaGATGCACCAAAAGAGAAAGGgttttagagctagaaatagcaagttaaaataag
479	NO01G05190	ccgggtccgattcccggtgcctgcaTCACGAACGCGAGAGCACAGgttttagagctagaaatagcaagttaaaataag
480	NO01G05210	ccgggtccgattcccggtgcctgcaTTTCCTGGCAGAGGTGACGAgttttagagctagaaatagcaagttaaaataag
481	NO01G05200	ccgggtccgattcccggtgcctgcaGTAGGCGGGGACGTGAACCAgttttagagctagaaatagcaagttaaaataag
482	NO01G05220	ccgggtccgattcccggtgcctgcaCCGTCACCCACAACTCAGGGgttttagagctagaaatagcaagttaaaataag
483	NO01G05230	ccgggtccgattcccggtgcctgcaTGGTCGTGGAGGTTTTCCGGgttttagagctagaaatagcaagttaaaataag
484	NO01G05240	ccgggtccgattcccggtgcctgcaGCTACTACTGTAGAACACGTgttttagagctagaaatagcaagttaaaataag
485	NO01G05250	ccgggtccgattcccggtgcctgcaATTTGCGCAAGACACCTGGCgttttagagctagaaatagcaagttaaaataag
486	NO01G05260	ccgggtccgattcccggtgcctgcaGGTGACGTATGGGAGGAGAGgttttagagctagaaatagcaagttaaaataag
487	NO01G05270	ccgggtccgattcccggtgcctgcaGAAGCACAAAAAAGCCACCAgttttagagctagaaatagcaagttaaaataag
488	NO01G05280	ccgggtccgattcccggtgcctgcaGGGCGTAAGTGTCCACGAGTgttttagagctagaaatagcaagttaaaataag
489	NO01G05290	ccgggtccgattcccggtgcctgcaCGAGGAAGAAGGTCGCATAGgttttagagctagaaatagcaagttaaaataag
490	NO01G05300	ccgggtccgattcccggtgcctgcaGCTGCTGATTCTGGCCAATGgttttagagctagaaatagcaagttaaaataag
491	NO01G05310	ccgggtccgattcccggtgcctgcaGCTCACCCCCGACCAACAAGgttttagagctagaaatagcaagttaaaataag
492	NO01G05320	ccgggtccgattcccggtgcctgcaTGGGTGTCCAAATCACCGGGgttttagagctagaaatagcaagttaaaataag
493	NO01G05330	ccgggtccgattcccggtgcctgcaGCACCACCGACTACACAACGgttttagagctagaaatagcaagttaaaataag
494	NO01G05340	ccgggtccgattcccggtgcctgcaGACGGAATCATCAACTCCAAgttttagagctagaaatagcaagttaaaataag
495	NO01G05350	ccgggtccgattcccggtgcctgcaGGACCTGTTAATGCTCACCGgttttagagctagaaatagcaagttaaaataag
496	NO01G05360	ccgggtccgattcccggtgcctgcaACTACGTCATTTTGTTGCATgttttagagctagaaatagcaagttaaaataag
497	NO01G05370	ccgggtccgattcccggtgcctgcaGCCCACATTATGATAGAGGGgttttagagctagaaatagcaagttaaaataag
498	NO01G05380	ccgggtccgattcccggtgcctgcaTTCCCCCGCCAAGTGCACAGgttttagagctagaaatagcaagttaaaataag
499	NO01G05390	ccgggtccgattcccggtgcctgcaAATTGCCAACCGGATTGCTGgttttagagctagaaatagcaagttaaaataag
500	NO01G05410	ccgggtccgattcccggtgcctgcaGGTCATCAAAATGCACACATgttttagagctagaaatagcaagttaaaataag
501	NO01G05420	ccgggtccgattcccggtgcctgcaGTATTACCTGGGCAAGACAAgttttagagctagaaatagcaagttaaaataag
502	NO01G05430	ccgggtccgattcccggtgcctgcaTATCACCCTTACCTTCACGGgttttagagctagaaatagcaagttaaaataag
503	NO01G05440	ccgggtccgattcccggtgcctgcaAAGACCTTTCGACCCCTCAGgttttagagctagaaatagcaagttaaaataag
504	NO01G05450	ccgggtccgattcccggtgcctgcaGCGTCGCTACCACAGAAGGGgttttagagctagaaatagcaagttaaaataag
505	NO01G05460	ccgggtccgattcccggtgcctgcaATTGAACCGAGAAACTGTGGgttttagagctagaaatagcaagttaaaataag
506	NO01G05470	ccgggtccgattcccggtgcctgcaTCTTCGGGTAGTAAGAGTAGgttttagagctagaaatagcaagttaaaataag
507	NO01G05500	ccgggtccgattcccggtgcctgcaACAAAAACTGCTTAGAGAGGgttttagagctagaaatagcaagttaaaataag
508	NO01G05510	ccgggtccgattcccggtgcctgcaCTAACGTTGGGCACACATGGgttttagagctagaaatagcaagttaaaataag
509	NO01G05520	ccgggtccgattcccggtgcctgcaACCGGCCATATACAGACTCGgttttagagctagaaatagcaagttaaaataag
510	NO01G05530	ccgggtccgattcccggtgcctgcaTGTGGGTCGATGGATTTGAGgttttagagctagaaatagcaagttaaaataag
511	NO01G05550	ccgggtccgattcccggtgcctgcaCGACAGTACCGCAACTCCCGgttttagagctagaaatagcaagttaaaataag
512	NO01G05560	ccgggtccgattcccggtgcctgcaAATCCGCGAAAAGCTCGAAGgttttagagctagaaatagcaagttaaaataag
513	NO01G05570	ccgggtccgattcccggtgcctgcaTCAAGACTTTACACGCATCGgttttagagctagaaatagcaagttaaaataag
514	NO01G05580	ccgggtccgattcccggtgcctgcaGAAGTCCAGAGATCGAACGAgttttagagctagaaatagcaagttaaaataag
515	NO01G05590	ccgggtccgattcccggtgcctgcaCTGCACATAAGGGAGCAAAGgttttagagctagaaatagcaagttaaaataag
516	NO01G05600	ccgggtccgattcccggtgcctgcaATTCATTACCAGCATCCGCGgttttagagctagaaatagcaagttaaaataag
517	NO01G05610	ccgggtccgattcccggtgcctgcaGGACAGGATGCCGAACAAAGgttttagagctagaaatagcaagttaaaataag
518	NO01G05620	ccgggtccgattcccggtgcctgcaGGATCTCCTCGGCGTCAGCGgttttagagctagaaatagcaagttaaaataag
519	NO01G05630	ccgggtccgattcccggtgcctgcaGGTCTTATACAGAGTCCGGGgttttagagctagaaatagcaagttaaaataag
520	NO01G05640	ccgggtccgattcccggtgcctgcaGTAGTGTACAGCTCCCACAGgttttagagctagaaatagcaagttaaaataag
521	NO01G05650	ccgggtccgattcccggtgcctgcaTCGCCCTGAAAGAACACCCGgttttagagctagaaatagcaagttaaaataag
522	NO01G05660	ccgggtccgattcccggtgcctgcaACTGTAATGATTGCCAGATGgttttagagctagaaatagcaagttaaaataag
523	NO01G05670	ccgggtccgattcccggtgcctgcaTCGAGGTGGTTGTCGCAGGGgttttagagctagaaatagcaagttaaaataag
524	NO01G05680	ccgggtccgattcccggtgcctgcaACACTCAGCATTTCCAAGCGgttttagagctagaaatagcaagttaaaataag
525	NO01G05690	ccgggtccgattcccggtgcctgcaCAGCGTCGAGATCCTCTCAGgttttagagctagaaatagcaagttaaaataag
526	NO01G05700	ccgggtccgattcccggtgcctgcaCCAAAGCAAGAGCGTTGACAgttttagagctagaaatagcaagttaaaataag
527	NO01G05710	ccgggtccgattcccggtgcctgcaACACCAAGATCAATGAACAGgttttagagctagaaatagcaagttaaaataag
528	NO01G05720	ccgggtccgattcccggtgcctgcaGCGTGGGGCCAATTCAACAGgttttagagctagaaatagcaagttaaaataag
529	NO01G05730	ccgggtccgattcccggtgcctgcaATAAGTCTCACCTGGCAAAGgttttagagctagaaatagcaagttaaaataag
530	NO01G05740	ccgggtccgattcccggtgcctgcaAGAAATATGACAGCTACTGGgttttagagctagaaatagcaagttaaaataag
531	NO01G05750	ccgggtccgattcccggtgcctgcaAGGGCTTGGGATATAGACACgttttagagctagaaatagcaagttaaaataag
532	NO01G05760	ccgggtccgattcccggtgcctgcaCGACGAGTACCAGCGCATCGgttttagagctagaaatagcaagttaaaataag
533	NO01G05770	ccgggtccgattcccggtgcctgcaCCTCCTCAAGCGTTGCGGTAgttttagagctagaaatagcaagttaaaataag
534	NO01G05780	ccgggtccgattcccggtgcctgcaTGGCAAGGGACGAAAAACAGgttttagagctagaaatagcaagttaaaataag
535	NO01G05790	ccgggtccgattcccggtgcctgcaCAGGTACATGCCCAACACTGgttttagagctagaaatagcaagttaaaataag
536	NO01G05800	ccgggtccgattcccggtgcctgcaCACATCGTGAGGATACACAGgttttagagctagaaatagcaagttaaaataag
537	NO01G05810	ccgggtccgattcccggtgcctgcaGAGAACGCCTCAACCCGATCgttttagagctagaaatagcaagttaaaataag
538	NO01G05830	ccgggtccgattcccggtgcctgcaGACGTTAGGGAGACGCACGAgttttagagctagaaatagcaagttaaaataag
539	NO01G05840	ccgggtccgattcccggtgcctgcaCGGCGTCATCATGAGCGTGGgttttagagctagaaatagcaagttaaaataag
540	NO01G05860	ccgggtccgattcccggtgcctgcaTTGAGGAGTTGAAGGCCAGGgttttagagctagaaatagcaagttaaaataag
541	NO01G05870	ccgggtccgattcccggtgcctgcaGGTGAAGCTGGCAACAGGTGgttttagagctagaaatagcaagttaaaataag
542	NO01G05880	ccgggtccgattcccggtgcctgcaGTAGTAAGGATCAAGCAAGCgttttagagctagaaatagcaagttaaaataag
543	NO01G05890	ccgggtccgattcccggtgcctgcaGGGGAGTAGTGACAAGAACGgttttagagctagaaatagcaagttaaaataag
544	NO01G05910	ccgggtccgattcccggtgcctgcaAGTTGACAGACAAACAATGGgttttagagctagaaatagcaagttaaaataag
545	NO01G05920	ccgggtccgattcccggtgcctgcaGGATCTCATCGATGAAGCCAgttttagagctagaaatagcaagttaaaataag
546	NO01G05940	ccgggtccgattcccggtgcctgcaAAAGAGCCACTTCCTCCTGCgttttagagctagaaatagcaagttaaaataag
547	NO02G00020	ccgggtccgattcccggtgcctgcaATTCGGGGAAGTCCGCCTCGgttttagagctagaaatagcaagttaaaataag
548	NO02G00030	ccgggtccgattcccggtgcctgcaAACGCAGTAACACAACTGAGgttttagagctagaaatagcaagttaaaataag
549	NO02G00040	ccgggtccgattcccggtgcctgcaTGGACCGTTTCGCACCAGCGgttttagagctagaaatagcaagttaaaataag
550	NO02G00050	ccgggtccgattcccggtgcctgcaCTATGTGGGCGTTTGGACCGgttttagagctagaaatagcaagttaaaataag
551	NO02G00060	ccgggtccgattcccggtgcctgcaGATATTTTGCTACAACAAGGgttttagagctagaaatagcaagttaaaataag
552	NO02G00070	ccgggtccgattcccggtgcctgcaTCCATCGAAGCAATTAACTGgttttagagctagaaatagcaagttaaaataag
553	NO02G00080	ccgggtccgattcccggtgcctgcaATCGACCTGGTGAATGACGAgttttagagctagaaatagcaagttaaaataag
554	NO02G00090	ccgggtccgattcccggtgcctgcaCTCGTGATCAGAGAGGACGTgttttagagctagaaatagcaagttaaaataag
555	NO02G00100	ccgggtccgattcccggtgcctgcaGGTATGCCAAGAAGCTCCTGgttttagagctagaaatagcaagttaaaataag
556	NO02G00110	ccgggtccgattcccggtgcctgcaAGAATACGAAAACATTCACGgttttagagctagaaatagcaagttaaaataag
557	NO02G00120	ccgggtccgattcccggtgcctgcaACCTGGTACAACGTGCAGGGgttttagagctagaaatagcaagttaaaataag
558	NO02G00130	ccgggtccgattcccggtgcctgcaTCGGCATTACGTGATCAACAgttttagagctagaaatagcaagttaaaataag
559	NO02G00140	ccgggtccgattcccggtgcctgcaAGACTGAATCACGTAGACGAgttttagagctagaaatagcaagttaaaataag
560	NO02G00150	ccgggtccgattcccggtgcctgcaGAGATGATTCTTGTGAATGGgttttagagctagaaatagcaagttaaaataag
561	NO02G00160	ccgggtccgattcccggtgcctgcaGCTTCGGCAGACGTATCAGGgttttagagctagaaatagcaagttaaaataag
562	NO02G00170	ccgggtccgattcccggtgcctgcaAGCACTGTGATAACCACCGGgttttagagctagaaatagcaagttaaaataag
563	NO02G00180	ccgggtccgattcccggtgcctgcaAGTCTTGTAGCTGACCATGGgttttagagctagaaatagcaagttaaaataag
564	NO02G00190	ccgggtccgattcccggtgcctgcaTTGCCCTATGGGTTGCGACGgttttagagctagaaatagcaagttaaaataag
565	NO02G00200	ccgggtccgattcccggtgcctgcaGCGCGTTATGAAGGTCAGCGgttttagagctagaaatagcaagttaaaataag
566	NO02G00210	ccgggtccgattcccggtgcctgcaTCATGGTATGAGAAAAGCTGgttttagagctagaaatagcaagttaaaataag
567	NO02G00220	ccgggtccgattcccggtgcctgcaCTACACCAGTGAAATTGACAgttttagagctagaaatagcaagttaaaataag
568	NO02G00230	ccgggtccgattcccggtgcctgcaCAACACGACTGTCTGCATGAgttttagagctagaaatagcaagttaaaataag
569	NO02G00240	ccgggtccgattcccggtgcctgcaCGCAGGGTACAAGAAGACAGgttttagagctagaaatagcaagttaaaataag
570	NO02G00250	ccgggtccgattcccggtgcctgcaCTTCTATTCAGGCTACCCGGgttttagagctagaaatagcaagttaaaataag
571	NO02G00260	ccgggtccgattcccggtgcctgcaGGTGCCTGTATGCTTCCGCGgttttagagctagaaatagcaagttaaaataag
572	NO02G00270	ccgggtccgattcccggtgcctgcaATGCACACCAAACACTGCAGgttttagagctagaaatagcaagttaaaataag
573	NO02G00280	ccgggtccgattcccggtgcctgcaACTGATTCGGGACCTGACAGgttttagagctagaaatagcaagttaaaataag
574	NO02G00290	ccgggtccgattcccggtgcctgcaTGGGCACGTTAAGGGCATGGgttttagagctagaaatagcaagttaaaataag
575	NO02G00300	ccgggtccgattcccggtgcctgcaCTTTACGGCTAAGAATCGTGgttttagagctagaaatagcaagttaaaataag
576	NO02G00310	ccgggtccgattcccggtgcctgcaCTTGCCGGCAGGTAAGACAGgttttagagctagaaatagcaagttaaaataag
577	NO02G00320	ccgggtccgattcccggtgcctgcaTCCTGCGGTCACCATCACCGgttttagagctagaaatagcaagttaaaataag
578	NO02G00330	ccgggtccgattcccggtgcctgcaGTAATACTTGACAACGTACGgttttagagctagaaatagcaagttaaaataag
579	NO02G00340	ccgggtccgattcccggtgcctgcaCAGCAAATATCTGCTCCATGgttttagagctagaaatagcaagttaaaataag
580	NO02G00350	ccgggtccgattcccggtgcctgcaGATAGACATGACGATGAACGgttttagagctagaaatagcaagttaaaataag
581	NO02G00360	ccgggtccgattcccggtgcctgcaGATGGTAACAGATACAAAGGgttttagagctagaaatagcaagttaaaataag
582	NO02G00370	ccgggtccgattcccggtgcctgcaCGAAGCTTAGAGGAGCAGGTgttttagagctagaaatagcaagttaaaataag
583	NO02G00380	ccgggtccgattcccggtgcctgcaGTCATGGGGTGAGCAGTCAGgttttagagctagaaatagcaagttaaaataag
584	NO02G00390	ccgggtccgattcccggtgcctgcaAAGTGCTGTGAGAGTGTCCAgttttagagctagaaatagcaagttaaaataag
585	NO02G00400	ccgggtccgattcccggtgcctgcaCAGTAGGATACAGACCATCGgttttagagctagaaatagcaagttaaaataag
586	NO02G00410	ccgggtccgattcccggtgcctgcaGGCACGATCAGCAACTACGAgttttagagctagaaatagcaagttaaaataag
587	NO02G00420	ccgggtccgattcccggtgcctgcaATAGTCGGAAAGGAAAAGCGgttttagagctagaaatagcaagttaaaataag
588	NO02G00430	ccgggtccgattcccggtgcctgcaGGAAGCGATCGATTCCGTCGgttttagagctagaaatagcaagttaaaataag
589	NO02G00440	ccgggtccgattcccggtgcctgcaTTACCCAGTCTATGGATGAGgttttagagctagaaatagcaagttaaaataag
590	NO02G00450	ccgggtccgattcccggtgcctgcaTAAGTCGATTTCCCTCATGGgttttagagctagaaatagcaagttaaaataag
591	NO02G00460	ccgggtccgattcccggtgcctgcaTAGCTGACATGACAGGACAGgttttagagctagaaatagcaagttaaaataag
592	NO02G00470	ccgggtccgattcccggtgcctgcaTGGTCGAAGTCCCGGCCAGGgttttagagctagaaatagcaagttaaaataag
593	NO02G00480	ccgggtccgattcccggtgcctgcaGTGGAAGAACGTGACAACGAgttttagagctagaaatagcaagttaaaataag
594	NO02G00490	ccgggtccgattcccggtgcctgcaTGGGGAGAAGAGAATCCAGGgttttagagctagaaatagcaagttaaaataag
595	NO02G00500	ccgggtccgattcccggtgcctgcaTGAACGGCAAGATCATCGGAgttttagagctagaaatagcaagttaaaataag
596	NO02G00510	ccgggtccgattcccggtgcctgcaTACTACGGGAACTACCAAGGgttttagagctagaaatagcaagttaaaataag
597	NO02G00520	ccgggtccgattcccggtgcctgcaACTGCCGAAGAACTTGACGGgttttagagctagaaatagcaagttaaaataag
598	NO02G00530	ccgggtccgattcccggtgcctgcaGGGGCACTTTGAGAAGACGAgttttagagctagaaatagcaagttaaaataag
599	NO02G00540	ccgggtccgattcccggtgcctgcaGTGGTGTCCGTCTTGCAGCGgttttagagctagaaatagcaagttaaaataag
600	NO02G00550	ccgggtccgattcccggtgcctgcaCTGCTCGATCACAGGCATGGgttttagagctagaaatagcaagttaaaataag
601	NO02G00560	ccgggtccgattcccggtgcctgcaCTGGTACCACATCAGCAACGgttttagagctagaaatagcaagttaaaataag
602	NO02G00570	ccgggtccgattcccggtgcctgcaCCGTACACTCCTTACCTCCGgttttagagctagaaatagcaagttaaaataag
603	NO02G00580	ccgggtccgattcccggtgcctgcaTGGACGATAAATGACCAGCGgttttagagctagaaatagcaagttaaaataag
604	NO02G00590	ccgggtccgattcccggtgcctgcaAGCTTGGCAACAATACTACGgttttagagctagaaatagcaagttaaaataag
605	NO02G00600	ccgggtccgattcccggtgcctgcaGGGTGAAGAATCGACCCGCGgttttagagctagaaatagcaagttaaaataag
606	NO02G00610	ccgggtccgattcccggtgcctgcaGGTAACAAGTACGGTCCCTGgttttagagctagaaatagcaagttaaaataag
607	NO02G00620	ccgggtccgattcccggtgcctgcaAGACGGGCGAGAAATTGACGgttttagagctagaaatagcaagttaaaataag
608	NO02G00630	ccgggtccgattcccggtgcctgcaTTGGCCGTTAGACTACAGAGgttttagagctagaaatagcaagttaaaataag
609	NO02G00650	ccgggtccgattcccggtgcctgcaCTACCAACAGCAAAACAAGAgttttagagctagaaatagcaagttaaaataag
610	NO02G00660	ccgggtccgattcccggtgcctgcaGCTGGACAGAGCTTGCTGCGgttttagagctagaaatagcaagttaaaataag
611	NO02G00670	ccgggtccgattcccggtgcctgcaGTTTCACCACTCCTCCCGTGgttttagagctagaaatagcaagttaaaataag
612	NO02G00680	ccgggtccgattcccggtgcctgcaGATCTGGGAAGGCGTGACAAgttttagagctagaaatagcaagttaaaataag
613	NO02G00690	ccgggtccgattcccggtgcctgcaAGCTTCCCGAAAATCCATCGgttttagagctagaaatagcaagttaaaataag
614	NO02G00700	ccgggtccgattcccggtgcctgcaTGACCCGGGAGAAAAAACAAgttttagagctagaaatagcaagttaaaataag
615	NO02G00710	ccgggtccgattcccggtgcctgcaGCGTTGCAAAGAGCTTGTGGgttttagagctagaaatagcaagttaaaataag
616	NO02G00720	ccgggtccgattcccggtgcctgcaCATCCCGCTTAAGGGCAGAGgttttagagctagaaatagcaagttaaaataag
617	NO02G00730	ccgggtccgattcccggtgcctgcaTCTTCGGCAAGATAAGCATGgttttagagctagaaatagcaagttaaaataag
618	NO02G00740	ccgggtccgattcccggtgcctgcaCGATATAACACATTCACGAGgttttagagctagaaatagcaagttaaaataag
619	NO02G00750	ccgggtccgattcccggtgcctgcaGTTAGAGGGCAAAAATGAGAgttttagagctagaaatagcaagttaaaataag
620	NO02G00760	ccgggtccgattcccggtgcctgcaTTAAGTTCAAGCAATACACGgttttagagctagaaatagcaagttaaaataag
621	NO02G00770	ccgggtccgattcccggtgcctgcaAATACTCGTCCTTTTCCCAGgttttagagctagaaatagcaagttaaaataag
622	NO02G00780	ccgggtccgattcccggtgcctgcaTTATTTTCCAGTTTGACGGGgttttagagctagaaatagcaagttaaaataag
623	NO02G00790	ccgggtccgattcccggtgcctgcaACACGCGTTGATCCATGTAGgttttagagctagaaatagcaagttaaaataag
624	NO02G00800	ccgggtccgattcccggtgcctgcaCAGGCGCTTTCGCAACAACGgttttagagctagaaatagcaagttaaaataag
625	NO02G00810	ccgggtccgattcccggtgcctgcaGTTGATCGGAAAAGACGTGAgttttagagctagaaatagcaagttaaaataag
626	NO02G00830	ccgggtccgattcccggtgcctgcaTGTTATGGTAGGCGCCAATGgttttagagctagaaatagcaagttaaaataag
627	NO02G00820	ccgggtccgattcccggtgcctgcaACAAATGGCGGAGTAAACGAgttttagagctagaaatagcaagttaaaataag
628	NO02G00840	ccgggtccgattcccggtgcctgcaAGACCAGGATCATCTCACTGgttttagagctagaaatagcaagttaaaataag
629	NO02G00850	ccgggtccgattcccggtgcctgcaAAGATGACGATGATAAGTAGgttttagagctagaaatagcaagttaaaataag
630	NO02G00860	ccgggtccgattcccggtgcctgcaGCATTCTCAAGATGCCCAAGgttttagagctagaaatagcaagttaaaataag
631	NO02G00870	ccgggtccgattcccggtgcctgcaGATGGACGTGACACTCGGGGgttttagagctagaaatagcaagttaaaataag
632	NO02G00880	ccgggtccgattcccggtgcctgcaGCTCTTGCAACGTAACCGGGgttttagagctagaaatagcaagttaaaataag
633	NO02G00890	ccgggtccgattcccggtgcctgcaGCCTCCGCATACTATATGGGgttttagagctagaaatagcaagttaaaataag
634	NO02G00900	ccgggtccgattcccggtgcctgcaGAGCTTCATTAGTCACAAGAgttttagagctagaaatagcaagttaaaataag
635	NO02G00910	ccgggtccgattcccggtgcctgcaCGTCTCATAGGTCTTGAGTGgttttagagctagaaatagcaagttaaaataag
636	NO02G00920	ccgggtccgattcccggtgcctgcaGAAAAAGAAACGTTCCCGCGgttttagagctagaaatagcaagttaaaataag
637	NO02G00930	ccgggtccgattcccggtgcctgcaAGTGCGGGCAAGGTCTACGAgttttagagctagaaatagcaagttaaaataag
638	NO02G00940	ccgggtccgattcccggtgcctgcaTCTGAACTCAAACTCAACAGgttttagagctagaaatagcaagttaaaataag
639	NO02G00950	ccgggtccgattcccggtgcctgcaTTGAGGCAAGGGTTGAACTGgttttagagctagaaatagcaagttaaaataag
640	NO02G00960	ccgggtccgattcccggtgcctgcaCCGCAAACGTAAGAAAGGGAgttttagagctagaaatagcaagttaaaataag
641	NO02G00970	ccgggtccgattcccggtgcctgcaCAGACCTTTGATAAGCGCCGgttttagagctagaaatagcaagttaaaataag
642	NO02G00980	ccgggtccgattcccggtgcctgcaACAAAGAAGGATGATGTCAAgttttagagctagaaatagcaagttaaaataag
643	NO02G00990	ccgggtccgattcccggtgcctgcaCAAGCCGTCTACCAAACTGGgttttagagctagaaatagcaagttaaaataag
644	NO02G01000	ccgggtccgattcccggtgcctgcaAATAGTACAAACAAGCATGGgttttagagctagaaatagcaagttaaaataag
645	NO02G01010	ccgggtccgattcccggtgcctgcaGTAGATGACAAAAACGACGAgttttagagctagaaatagcaagttaaaataag
646	NO02G01020	ccgggtccgattcccggtgcctgcaGCAGCGGCAAGAAAACCGTGgttttagagctagaaatagcaagttaaaataag
647	NO02G01030	ccgggtccgattcccggtgcctgcaAATTACGGTCCTGATCTGCGgttttagagctagaaatagcaagttaaaataag
648	NO02G01040	ccgggtccgattcccggtgcctgcaACGTTATTCTCGATCCCCAGgttttagagctagaaatagcaagttaaaataag
649	NO02G01050	ccgggtccgattcccggtgcctgcaCTTGGAAACGTCATCCCGGGgttttagagctagaaatagcaagttaaaataag
650	NO02G01060	ccgggtccgattcccggtgcctgcaCTTCCCCTCAACATCAACGTgttttagagctagaaatagcaagttaaaataag
651	NO02G01070	ccgggtccgattcccggtgcctgcaGGAATTGAGCAAGAAGCGTGgttttagagctagaaatagcaagttaaaataag
652	NO02G01080	ccgggtccgattcccggtgcctgcaACAACAGTCGCACAAACAGGgttttagagctagaaatagcaagttaaaataag
653	NO02G01090	ccgggtccgattcccggtgcctgcaATACCGAACGATCTACGAGGgttttagagctagaaatagcaagttaaaataag
654	NO02G01100	ccgggtccgattcccggtgcctgcaTTGCTAAAAGTGATGCAAAGgttttagagctagaaatagcaagttaaaataag
655	NO02G01110	ccgggtccgattcccggtgcctgcaCATCCCATCTTACATCTCCGgttttagagctagaaatagcaagttaaaataag
656	NO02G01120	ccgggtccgattcccggtgcctgcaTCGCCTGACGAATAACGTGGgttttagagctagaaatagcaagttaaaataag
657	NO02G01130	ccgggtccgattcccggtgcctgcaTGACTGGGAGAGGTGAGCAGgttttagagctagaaatagcaagttaaaataag
658	NO02G01140	ccgggtccgattcccggtgcctgcaGGTCCCTTAACAAATGTACGgttttagagctagaaatagcaagttaaaataag
659	NO02G01150	ccgggtccgattcccggtgcctgcaTTTTAAGGGCGGGAGACAGGgttttagagctagaaatagcaagttaaaataag
660	NO02G01160	ccgggtccgattcccggtgcctgcaCGTGGGCTCGAAACCCCCGAgttttagagctagaaatagcaagttaaaataag
661	NO02G01170	ccgggtccgattcccggtgcctgcaTTCAGTGGAAGAAACCATGAgttttagagctagaaatagcaagttaaaataag
662	NO02G01180	ccgggtccgattcccggtgcctgcaAACGGATTCAAATGGCATGGgttttagagctagaaatagcaagttaaaataag
663	NO02G01200	ccgggtccgattcccggtgcctgcaTTCTGGTTGATAGGAGATGGgttttagagctagaaatagcaagttaaaataag
664	NO02G01190	ccgggtccgattcccggtgcctgcaTGTCGCCCTTGCGTACACAGgttttagagctagaaatagcaagttaaaataag
665	NO02G01210	ccgggtccgattcccggtgcctgcaCAGCATCGTTAACATGAACGgttttagagctagaaatagcaagttaaaataag
666	NO02G01220	ccgggtccgattcccggtgcctgcaGCTGTACTAAGAGGACACTGgttttagagctagaaatagcaagttaaaataag
667	NO02G01230	ccgggtccgattcccggtgcctgcaCAACGTGGAAATGACCCATGgttttagagctagaaatagcaagttaaaataag
668	NO02G01240	ccgggtccgattcccggtgcctgcaATCATCTCTGATGAAAAACGgttttagagctagaaatagcaagttaaaataag
669	NO02G01260	ccgggtccgattcccggtgcctgcaAACAACCGAGTACCTCAACGgttttagagctagaaatagcaagttaaaataag
670	NO02G01270	ccgggtccgattcccggtgcctgcaTGGACGAAGAGCAACACGAGgttttagagctagaaatagcaagttaaaataag
671	NO02G01280	ccgggtccgattcccggtgcctgcaGCTAAGCCATGAACTCAATGgttttagagctagaaatagcaagttaaaataag
672	NO02G01290	ccgggtccgattcccggtgcctgcaAAATGGATCCTCCCACAACGgttttagagctagaaatagcaagttaaaataag
673	NO02G01300	ccgggtccgattcccggtgcctgcaGCAGCACGCGAAGAATTTGGgttttagagctagaaatagcaagttaaaataag
674	NO02G01310	ccgggtccgattcccggtgcctgcaGGTCGCGGGATATACCCCCAgttttagagctagaaatagcaagttaaaataag
675	NO02G01320	ccgggtccgattcccggtgcctgcaTGATAACCCGGAGATCACTGgttttagagctagaaatagcaagttaaaataag
676	NO02G01330	ccgggtccgattcccggtgcctgcaGTGGTCATTAGGAGGCAGAGgttttagagctagaaatagcaagttaaaataag
677	NO02G01340	ccgggtccgattcccggtgcctgcaGTTGCGGTGATGATGCACAGgttttagagctagaaatagcaagttaaaataag
678	NO02G01350	ccgggtccgattcccggtgcctgcaGTGAAGCTAATGGAGAACGGgttttagagctagaaatagcaagttaaaataag
679	NO02G01360	ccgggtccgattcccggtgcctgcaGATTGGCTACCAAAGCAGATgttttagagctagaaatagcaagttaaaataag
680	NO02G01370	ccgggtccgattcccggtgcctgcaCAGGCCTACTAACAACAGCGgttttagagctagaaatagcaagttaaaataag
681	NO02G01380	ccgggtccgattcccggtgcctgcaGTGGATATGATCATGCGGTGgttttagagctagaaatagcaagttaaaataag
682	NO02G01390	ccgggtccgattcccggtgcctgcaAGCCATCACTACCCATGACAgttttagagctagaaatagcaagttaaaataag
683	NO02G01400	ccgggtccgattcccggtgcctgcaTAACTGCTCAACCACACTGGgttttagagctagaaatagcaagttaaaataag
684	NO02G01410	ccgggtccgattcccggtgcctgcaGTCACTGGATATTCTCTTGGgttttagagctagaaatagcaagttaaaataag
685	NO02G01420	ccgggtccgattcccggtgcctgcaACGCGCGGGTGAATTACTAGgttttagagctagaaatagcaagttaaaataag
686	NO02G01430	ccgggtccgattcccggtgcctgcaGGCGCAGAGGAATGGCAAGGgttttagagctagaaatagcaagttaaaataag
687	NO02G01440	ccgggtccgattcccggtgcctgcaAAGCTTCGCGAGCTACAAGGgttttagagctagaaatagcaagttaaaataag
688	NO02G01450	ccgggtccgattcccggtgcctgcaGGATGCTTCGATCTTATGGGgttttagagctagaaatagcaagttaaaataag
689	NO02G01460	ccgggtccgattcccggtgcctgcaGCACAAGAAAAGGCACCCAGgttttagagctagaaatagcaagttaaaataag
690	NO02G01470	ccgggtccgattcccggtgcctgcaCTTCCTTCTTCATATCAATGgttttagagctagaaatagcaagttaaaataag
691	NO02G01480	ccgggtccgattcccggtgcctgcaCCATCTGATCCAAGAAAAGGgttttagagctagaaatagcaagttaaaataag
692	NO02G01490	ccgggtccgattcccggtgcctgcaGGCATTGCTGAAAAACCACAgttttagagctagaaatagcaagttaaaataag
693	NO02G01510	ccgggtccgattcccggtgcctgcaGTAGACGTGCATCAGCTCGTgttttagagctagaaatagcaagttaaaataag
694	NO02G01520	ccgggtccgattcccggtgcctgcaAAAATATGCAAGAAGCAAAGgttttagagctagaaatagcaagttaaaataag
695	NO02G01530	ccgggtccgattcccggtgcctgcaCGGACGAGGTGAGAATACCGgttttagagctagaaatagcaagttaaaataag
696	NO02G01540	ccgggtccgattcccggtgcctgcaGAGAATTGATGGACACCGAGgttttagagctagaaatagcaagttaaaataag
697	NO02G01560	ccgggtccgattcccggtgcctgcaTGGGCCGGCAAACAACGACGgttttagagctagaaatagcaagttaaaataag
698	NO02G01570	ccgggtccgattcccggtgcctgcaGGTGAAGAAGAAACCTTGGAgttttagagctagaaatagcaagttaaaataag
699	NO02G01580	ccgggtccgattcccggtgcctgcaGTTCGAATTCGGATTCAGGGgttttagagctagaaatagcaagttaaaataag
700	NO02G01590	ccgggtccgattcccggtgcctgcaATGCACACCGTATACCACCAgttttagagctagaaatagcaagttaaaataag
701	NO02G01600	ccgggtccgattcccggtgcctgcaTCTACCACGCATATACAAGAgttttagagctagaaatagcaagttaaaataag
702	NO02G01610	ccgggtccgattcccggtgcctgcaTGCGCGCCGTTAGAATGACAgttttagagctagaaatagcaagttaaaataag
703	NO02G01620	ccgggtccgattcccggtgcctgcaGGAGAGTGTCAAGAGTCTGGgttttagagctagaaatagcaagttaaaataag
704	NO02G01630	ccgggtccgattcccggtgcctgcaGGACCGTGGAAATAACCATGgttttagagctagaaatagcaagttaaaataag
705	NO02G01640	ccgggtccgattcccggtgcctgcaGGCGTAGAAGTCCACCACCAgttttagagctagaaatagcaagttaaaataag
706	NO02G01650	ccgggtccgattcccggtgcctgcaGCAGCCCTTCAAGTGACGAGgttttagagctagaaatagcaagttaaaataag
707	NO02G01660	ccgggtccgattcccggtgcctgcaCAAAAACATCCTGGTCACCGgttttagagctagaaatagcaagttaaaataag
708	NO02G01670	ccgggtccgattcccggtgcctgcaACTTTCGACACAGAAGATGGgttttagagctagaaatagcaagttaaaataag
709	NO02G01680	ccgggtccgattcccggtgcctgcaTTTACACTTTTGCCGCAGAGgttttagagctagaaatagcaagttaaaataag
710	NO02G01690	ccgggtccgattcccggtgcctgcaAATGACTTCCAACCACGACGgttttagagctagaaatagcaagttaaaataag
711	NO02G01700	ccgggtccgattcccggtgcctgcaTGGTACCACCCTTCACACAAgttttagagctagaaatagcaagttaaaataag
712	NO02G01710	ccgggtccgattcccggtgcctgcaGAAGAAGCGAGGTTACACCCgttttagagctagaaatagcaagttaaaataag
713	NO02G01720	ccgggtccgattcccggtgcctgcaTCTCTTCTTTGCGGGCCCCGgttttagagctagaaatagcaagttaaaataag
714	NO02G01730	ccgggtccgattcccggtgcctgcaTGGGCAAATATATTTCACCGgttttagagctagaaatagcaagttaaaataag
715	NO02G01740	ccgggtccgattcccggtgcctgcaTCTGCCCCTCGCATGTCCCGgttttagagctagaaatagcaagttaaaataag
716	NO02G01750	ccgggtccgattcccggtgcctgcaGGAGTGCTTGAAGTATGACGgttttagagctagaaatagcaagttaaaataag
717	NO02G01760	ccgggtccgattcccggtgcctgcaATTGTCGTCTACGTAGACAGgttttagagctagaaatagcaagttaaaataag
718	NO02G01770	ccgggtccgattcccggtgcctgcaTAGAAGACTCCAAAGCAGGGgttttagagctagaaatagcaagttaaaataag
719	NO02G01780	ccgggtccgattcccggtgcctgcaATCAACTAAGTCTACCCAGGgttttagagctagaaatagcaagttaaaataag
720	NO02G01790	ccgggtccgattcccggtgcctgcaTCTAAGTAGACGATGCCCTGgttttagagctagaaatagcaagttaaaataag
721	NO02G01800	ccgggtccgattcccggtgcctgcaTCTCGCATCCACCAACACCGgttttagagctagaaatagcaagttaaaataag
722	NO02G01810	ccgggtccgattcccggtgcctgcaTTTGCGGAAGGTGACAACCGgttttagagctagaaatagcaagttaaaataag
723	NO02G01820	ccgggtccgattcccggtgcctgcaGCATGTTCTCAAGCAAAGGGgttttagagctagaaatagcaagttaaaataag
724	NO02G01830	ccgggtccgattcccggtgcctgcaCCCAGACCAAGAATGTAACGgttttagagctagaaatagcaagttaaaataag
725	NO02G01860	ccgggtccgattcccggtgcctgcaTAGGCAACCGACTATCAGCAgttttagagctagaaatagcaagttaaaataag
726	NO02G01870	ccgggtccgattcccggtgcctgcaTAAAGCAACCTCCTCTACCTgttttagagctagaaatagcaagttaaaataag
727	NO02G01880	ccgggtccgattcccggtgcctgcaTGATCGTGTAATGCCGATGGgttttagagctagaaatagcaagttaaaataag
728	NO02G01890	ccgggtccgattcccggtgcctgcaCGACCCTGAGCATCTCGCCGgttttagagctagaaatagcaagttaaaataag
729	NO02G01900	ccgggtccgattcccggtgcctgcaCGTAGGCCGATGCACCTACGgttttagagctagaaatagcaagttaaaataag
730	NO02G01910	ccgggtccgattcccggtgcctgcaAAATATCCGAGACACCGCAGgttttagagctagaaatagcaagttaaaataag
731	NO02G01920	ccgggtccgattcccggtgcctgcaCGCATCGCAGCCCACCACGAgttttagagctagaaatagcaagttaaaataag
732	NO02G01930	ccgggtccgattcccggtgcctgcaTTTCTGATTTCTACTCGTGGgttttagagctagaaatagcaagttaaaataag
733	NO02G01940	ccgggtccgattcccggtgcctgcaCGGTTCGTGTGGAACAACAGgttttagagctagaaatagcaagttaaaataag
734	NO02G01950	ccgggtccgattcccggtgcctgcaGGTAAACAATAAGACGACAGgttttagagctagaaatagcaagttaaaataag
735	NO02G01960	ccgggtccgattcccggtgcctgcaTGGCATGAGTGGCATCCGCGgttttagagctagaaatagcaagttaaaataag
736	NO02G01970	ccgggtccgattcccggtgcctgcaGCTGTGCGCTCCTTAGAAGGgttttagagctagaaatagcaagttaaaataag
737	NO02G01980	ccgggtccgattcccggtgcctgcaGAGGAGTCACTGGGACAACGgttttagagctagaaatagcaagttaaaataag
738	NO02G01990	ccgggtccgattcccggtgcctgcaGCTAATCAAGACCCGAACGGgttttagagctagaaatagcaagttaaaataag
739	NO02G02000	ccgggtccgattcccggtgcctgcaAAATGCATCAGCAAAAACGTgttttagagctagaaatagcaagttaaaataag
740	NO02G02010	ccgggtccgattcccggtgcctgcaCGGATCGCATCAGTATGGAGgttttagagctagaaatagcaagttaaaataag
741	NO02G02020	ccgggtccgattcccggtgcctgcaCAGTTTACCATCCTGGCCAAgttttagagctagaaatagcaagttaaaataag
742	NO02G02030	ccgggtccgattcccggtgcctgcaACTTGAAAAGTGATTCCATGgttttagagctagaaatagcaagttaaaataag
743	NO02G02040	ccgggtccgattcccggtgcctgcaTGCGGCCAGGACATGCAGCGgttttagagctagaaatagcaagttaaaataag
744	NO02G02050	ccgggtccgattcccggtgcctgcaGAGGACCCCGCATCACTACGgttttagagctagaaatagcaagttaaaataag
745	NO02G02060	ccgggtccgattcccggtgcctgcaGTCAGTACTATATGAAGACGgttttagagctagaaatagcaagttaaaataag
746	NO02G02070	ccgggtccgattcccggtgcctgcaTAGGGCTTGAATATGCTGCGgttttagagctagaaatagcaagttaaaataag
747	NO02G02080	ccgggtccgattcccggtgcctgcaATAGCGCAGGTTGAACTGAGgttttagagctagaaatagcaagttaaaataag
748	NO02G02090	ccgggtccgattcccggtgcctgcaTGATCCGGTTTAGAACAACAgttttagagctagaaatagcaagttaaaataag
749	NO02G02100	ccgggtccgattcccggtgcctgcaGGACAACCCTGATAATGTGAgttttagagctagaaatagcaagttaaaataag
750	NO02G02110	ccgggtccgattcccggtgcctgcaAGCGCTACATGCCGGCCACGgttttagagctagaaatagcaagttaaaataag
751	NO02G02120	ccgggtccgattcccggtgcctgcaGGCACGCAAACAGGTGACGGgttttagagctagaaatagcaagttaaaataag
752	NO02G02130	ccgggtccgattcccggtgcctgcaCGAGTTTAACAAGAACCGGGgttttagagctagaaatagcaagttaaaataag
753	NO02G02140	ccgggtccgattcccggtgcctgcaGGGTGCGGCAGGAATCACTGgttttagagctagaaatagcaagttaaaataag
754	NO02G02150	ccgggtccgattcccggtgcctgcaGATATGCTGCCACAAATGCAgttttagagctagaaatagcaagttaaaataag
755	NO02G02170	ccgggtccgattcccggtgcctgcaAGCTACTGAATGGTACAACGgttttagagctagaaatagcaagttaaaataag
756	NO02G02180	ccgggtccgattcccggtgcctgcaTACAAATCTTTCCTCCCCGGgttttagagctagaaatagcaagttaaaataag
757	NO02G02190	ccgggtccgattcccggtgcctgcaCTTGACGAAGATGCCCAAGGgttttagagctagaaatagcaagttaaaataag
758	NO02G02200	ccgggtccgattcccggtgcctgcaACTGCGCGGCATTGTCCCCGgttttagagctagaaatagcaagttaaaataag
759	NO02G02210	ccgggtccgattcccggtgcctgcaTCTCCATGTGCATCGCCGAGgttttagagctagaaatagcaagttaaaataag
760	NO02G02220	ccgggtccgattcccggtgcctgcaCATTTCATCAAGACCGACGAgttttagagctagaaatagcaagttaaaataag
761	NO02G02230	ccgggtccgattcccggtgcctgcaAAAGCTTTATGAGACCTGTGgttttagagctagaaatagcaagttaaaataag
762	NO02G02240	ccgggtccgattcccggtgcctgcaAGGAGATGTCGTCTACGCAGgttttagagctagaaatagcaagttaaaataag
763	NO02G02250	ccgggtccgattcccggtgcctgcaCTGGCTGACACAGAGCGAGAgttttagagctagaaatagcaagttaaaataag
764	NO02G02260	ccgggtccgattcccggtgcctgcaTATTCAAGTCCTGGGCTCTGgttttagagctagaaatagcaagttaaaataag
765	NO02G02270	ccgggtccgattcccggtgcctgcaGATCGCCGGTCCATCCAAAGgttttagagctagaaatagcaagttaaaataag
766	NO02G02280	ccgggtccgattcccggtgcctgcaGCTGTGTATCAAATATACCGgttttagagctagaaatagcaagttaaaataag
767	NO02G02290	ccgggtccgattcccggtgcctgcaCGAACAAAGACAAAACTCAGgttttagagctagaaatagcaagttaaaataag
768	NO02G02300	ccgggtccgattcccggtgcctgcaCTTTGTCCCCCCAAACACGAgttttagagctagaaatagcaagttaaaataag
769	NO02G02310	ccgggtccgattcccggtgcctgcaATCGGGCAAGACCTGCACGGgttttagagctagaaatagcaagttaaaataag
770	NO02G02320	ccgggtccgattcccggtgcctgcaCTCGGGCGTCGTAAGCTCAGgttttagagctagaaatagcaagttaaaataag
771	NO02G02330	ccgggtccgattcccggtgcctgcaCATTCCGCCAAGCTTTTGAGgttttagagctagaaatagcaagttaaaataag
772	NO02G02340	ccgggtccgattcccggtgcctgcaGCCCTCTCAAGAACTCTCGGgttttagagctagaaatagcaagttaaaataag
773	NO02G02350	ccgggtccgattcccggtgcctgcaGTGCCCACGAGGCCTCAAAGgttttagagctagaaatagcaagttaaaataag
774	NO02G02360	ccgggtccgattcccggtgcctgcaAGCGTTCGGTCCGGGTCGTGgttttagagctagaaatagcaagttaaaataag
775	NO02G02370	ccgggtccgattcccggtgcctgcaGAGTGTCTTCAGGTGCCGTGgttttagagctagaaatagcaagttaaaataag
776	NO02G02380	ccgggtccgattcccggtgcctgcaTATTGACCTAGTGAACAACAgttttagagctagaaatagcaagttaaaataag
777	NO02G02390	ccgggtccgattcccggtgcctgcaGCGACGGGTAGATGGTCCTGgttttagagctagaaatagcaagttaaaataag
778	NO02G02400	ccgggtccgattcccggtgcctgcaATACGAGTCACATTATCACGgttttagagctagaaatagcaagttaaaataag
779	NO02G02410	ccgggtccgattcccggtgcctgcaTACTGCTTGACAGCTCTGGGgttttagagctagaaatagcaagttaaaataag
780	NO02G02420	ccgggtccgattcccggtgcctgcaGGATTTGTGAGCTTCCAGAGgttttagagctagaaatagcaagttaaaataag
781	NO02G02430	ccgggtccgattcccggtgcctgcaGCTGTGATATAGTGATACGAgttttagagctagaaatagcaagttaaaataag
782	NO02G02440	ccgggtccgattcccggtgcctgcaCGAGCCCGTAGAGATCACGAgttttagagctagaaatagcaagttaaaataag
783	NO02G02450	ccgggtccgattcccggtgcctgcaCAGTTTTAGAGACATGCACGgttttagagctagaaatagcaagttaaaataag
784	NO02G02460	ccgggtccgattcccggtgcctgcaCTCCCTTACTGATCCCGATGgttttagagctagaaatagcaagttaaaataag
785	NO02G02470	ccgggtccgattcccggtgcctgcaTCACAATCAAGTAACGACCAgttttagagctagaaatagcaagttaaaataag
786	NO02G02480	ccgggtccgattcccggtgcctgcaGGATAAGCAATGCGTCACGGgttttagagctagaaatagcaagttaaaataag
787	NO02G02490	ccgggtccgattcccggtgcctgcaGCTATGGGTCGTATTAACAGgttttagagctagaaatagcaagttaaaataag
788	NO02G02500	ccgggtccgattcccggtgcctgcaACCACCCTTGACGAGCCATGgttttagagctagaaatagcaagttaaaataag
789	NO02G02510	ccgggtccgattcccggtgcctgcaGTTACAGAATCCATCACCGGgttttagagctagaaatagcaagttaaaataag
790	NO02G02520	ccgggtccgattcccggtgcctgcaCAGATAGAGCTACCTGACGTgttttagagctagaaatagcaagttaaaataag
791	NO02G02530	ccgggtccgattcccggtgcctgcaAGACGCGTCTATGAGCCCAGgttttagagctagaaatagcaagttaaaataag
792	NO02G02540	ccgggtccgattcccggtgcctgcaAATGACGGCAGTACGCTCGGgttttagagctagaaatagcaagttaaaataag
793	NO02G02550	ccgggtccgattcccggtgcctgcaGACGTAACAGGTACTATTGGgttttagagctagaaatagcaagttaaaataag
794	NO02G02560	ccgggtccgattcccggtgcctgcaCCTATGGCAATGGACGAAGGgttttagagctagaaatagcaagttaaaataag
795	NO02G02570	ccgggtccgattcccggtgcctgcaAGTGGCAAAAGGATGACAGGgttttagagctagaaatagcaagttaaaataag
796	NO02G02580	ccgggtccgattcccggtgcctgcaGAAACAAGTGTGCCTCCACGgttttagagctagaaatagcaagttaaaataag
797	NO02G02590	ccgggtccgattcccggtgcctgcaGAGTCTCGAAGTGCCCACGAgttttagagctagaaatagcaagttaaaataag
798	NO02G02600	ccgggtccgattcccggtgcctgcaGTACCTGCGGCAGTTGAACGgttttagagctagaaatagcaagttaaaataag
799	NO02G02610	ccgggtccgattcccggtgcctgcaGAAGGTGACGACTTCCACAGgttttagagctagaaatagcaagttaaaataag
800	NO02G02620	ccgggtccgattcccggtgcctgcaGCAGTCTCTTCGCGCCACAGgttttagagctagaaatagcaagttaaaataag
801	NO02G02630	ccgggtccgattcccggtgcctgcaATTGCCCCCTTAGTGTGACGgttttagagctagaaatagcaagttaaaataag
802	NO02G02640	ccgggtccgattcccggtgcctgcaTACGGAGCGTGGATGCCCTGgttttagagctagaaatagcaagttaaaataag
803	NO02G02650	ccgggtccgattcccggtgcctgcaGTTGGTGTTTCCTCTGCAGGgttttagagctagaaatagcaagttaaaataag
804	NO02G02660	ccgggtccgattcccggtgcctgcaGGAACTCGGCCAAGTACCGGgttttagagctagaaatagcaagttaaaataag
805	NO02G02670	ccgggtccgattcccggtgcctgcaGCGGTTCAAGGCAATATCAGgttttagagctagaaatagcaagttaaaataag
806	NO02G02680	ccgggtccgattcccggtgcctgcaACTACCCCAAAGTGACGCCGgttttagagctagaaatagcaagttaaaataag
807	NO02G02690	ccgggtccgattcccggtgcctgcaGGCTATCTCTTGCTGTGGTGgttttagagctagaaatagcaagttaaaataag
808	NO02G02700	ccgggtccgattcccggtgcctgcaAATGGCCAAGGAGACCCCAGgttttagagctagaaatagcaagttaaaataag
809	NO02G02710	ccgggtccgattcccggtgcctgcaGACAGACACCACCACAATCGgttttagagctagaaatagcaagttaaaataag
810	NO02G02720	ccgggtccgattcccggtgcctgcaGAAGGAGCACTTGGCCATTGgttttagagctagaaatagcaagttaaaataag
811	NO02G02730	ccgggtccgattcccggtgcctgcaCTGCTTAGGTACTACACTCGgttttagagctagaaatagcaagttaaaataag
812	NO02G02740	ccgggtccgattcccggtgcctgcaCGGTCATTCAGCCATCCGGGgttttagagctagaaatagcaagttaaaataag
813	NO02G02750	ccgggtccgattcccggtgcctgcaTCTCCTCGTCCCGTGAATGGgttttagagctagaaatagcaagttaaaataag
814	NO02G02770	ccgggtccgattcccggtgcctgcaGTTGCTGCAGACCTACCGGGgttttagagctagaaatagcaagttaaaataag
815	NO02G02780	ccgggtccgattcccggtgcctgcaGATCGAGGACGTGATTGACGgttttagagctagaaatagcaagttaaaataag
816	NO02G02790	ccgggtccgattcccggtgcctgcaAACACAATCAGGCATAGTATgttttagagctagaaatagcaagttaaaataag
817	NO02G02800	ccgggtccgattcccggtgcctgcaCGTATGGCCGCAAACCGTAAgttttagagctagaaatagcaagttaaaataag
818	NO02G02820	ccgggtccgattcccggtgcctgcaGCGTCATCTCGACAGCAGCTgttttagagctagaaatagcaagttaaaataag
819	NO02G02830	ccgggtccgattcccggtgcctgcaGTTGTCGTCATTCAGCCACGgttttagagctagaaatagcaagttaaaataag
820	NO02G02840	ccgggtccgattcccggtgcctgcaAGGCGTACAGACCCGCACTGgttttagagctagaaatagcaagttaaaataag
821	NO02G02850	ccgggtccgattcccggtgcctgcaCCCGCTCAACAACAGCCGAGgttttagagctagaaatagcaagttaaaataag
822	NO02G02860	ccgggtccgattcccggtgcctgcaACACAGACTGGGAACGACGAgttttagagctagaaatagcaagttaaaataag
823	NO02G02880	ccgggtccgattcccggtgcctgcaCCCGAATATCGTTTACAAGGgttttagagctagaaatagcaagttaaaataag
824	NO02G02890	ccgggtccgattcccggtgcctgcaTCACTGTCGACGATATGCTGgttttagagctagaaatagcaagttaaaataag
825	NO02G02900	ccgggtccgattcccggtgcctgcaTGGTGGTGCCATGAAATACGgttttagagctagaaatagcaagttaaaataag
826	NO02G02910	ccgggtccgattcccggtgcctgcaAAGCCCACGAGCAAGTCCTGgttttagagctagaaatagcaagttaaaataag
827	NO02G02920	ccgggtccgattcccggtgcctgcaCCGGCATTCTTCCCTAACGTgttttagagctagaaatagcaagttaaaataag
828	NO02G02930	ccgggtccgattcccggtgcctgcaACCCCCATCGACACTTGTGGgttttagagctagaaatagcaagttaaaataag
829	NO02G02940	ccgggtccgattcccggtgcctgcaCAACAGCCGCAATTTCAACGgttttagagctagaaatagcaagttaaaataag
830	NO02G02950	ccgggtccgattcccggtgcctgcaGAAGTCACGCAACTACCAAGgttttagagctagaaatagcaagttaaaataag
831	NO02G02960	ccgggtccgattcccggtgcctgcaCCACCAGCAGTCCACCATCGgttttagagctagaaatagcaagttaaaataag
832	NO02G02970	ccgggtccgattcccggtgcctgcaCACCAGAAAGAGACACAACGgttttagagctagaaatagcaagttaaaataag
833	NO02G02980	ccgggtccgattcccggtgcctgcaTGTACAAGACACATGCCTGGgttttagagctagaaatagcaagttaaaataag
834	NO02G02990	ccgggtccgattcccggtgcctgcaGCACTGGCTTTACATCACCGgttttagagctagaaatagcaagttaaaataag
835	NO02G03000	ccgggtccgattcccggtgcctgcaGAGATGAAAGACAATGTCAGgttttagagctagaaatagcaagttaaaataag
836	NO02G03010	ccgggtccgattcccggtgcctgcaCTTTCGCAAAGTAACAAAGGgttttagagctagaaatagcaagttaaaataag
837	NO02G03020	ccgggtccgattcccggtgcctgcaACCCCCCGTTATACCAATGGgttttagagctagaaatagcaagttaaaataag
838	NO02G03030	ccgggtccgattcccggtgcctgcaATACCGCCAAGAATGCCGCGgttttagagctagaaatagcaagttaaaataag
839	NO02G03040	ccgggtccgattcccggtgcctgcaACGCACGCTTGTCATCAGCAgttttagagctagaaatagcaagttaaaataag
840	NO02G03050	ccgggtccgattcccggtgcctgcaAAGGAATGGAAAAAAAATCGgttttagagctagaaatagcaagttaaaataag
841	NO02G03060	ccgggtccgattcccggtgcctgcaTGTACAATAAGAATGTTGAGgttttagagctagaaatagcaagttaaaataag
842	NO02G03070	ccgggtccgattcccggtgcctgcaGGCAGTTGGTAGGACCTCCAgttttagagctagaaatagcaagttaaaataag
843	NO02G03080	ccgggtccgattcccggtgcctgcaTTAGATGAGAGCTACCCAGGgttttagagctagaaatagcaagttaaaataag
844	NO02G03090	ccgggtccgattcccggtgcctgcaCAGCGGCATCTAAAACAGCGgttttagagctagaaatagcaagttaaaataag
845	NO02G03100	ccgggtccgattcccggtgcctgcaTATAGAGCCCCTGATCCGCGgttttagagctagaaatagcaagttaaaataag
846	NO02G03110	ccgggtccgattcccggtgcctgcaGTTTGACTACTACGCCAGCGgttttagagctagaaatagcaagttaaaataag
847	NO02G03120	ccgggtccgattcccggtgcctgcaGTTCATCGTCTGGAGCACAGgttttagagctagaaatagcaagttaaaataag
848	NO02G03130	ccgggtccgattcccggtgcctgcaAGATAATCCAAATACGCCAGgttttagagctagaaatagcaagttaaaataag
849	NO02G03150	ccgggtccgattcccggtgcctgcaCACAAACAGCTCCAACCACGgttttagagctagaaatagcaagttaaaataag
850	NO02G03140	ccgggtccgattcccggtgcctgcaTTCCGCGTTGAACAGCACGGgttttagagctagaaatagcaagttaaaataag
851	NO02G03160	ccgggtccgattcccggtgcctgcaGCCAGCGGGCTTCTGCATCGgttttagagctagaaatagcaagttaaaataag
852	NO02G03170	ccgggtccgattcccggtgcctgcaAGTGAACAGGAATTGACAGGgttttagagctagaaatagcaagttaaaataag
853	NO02G03180	ccgggtccgattcccggtgcctgcaAGAATCCATGTACGACACGGgttttagagctagaaatagcaagttaaaataag
854	NO02G03190	ccgggtccgattcccggtgcctgcaGGTACGTGGCCAGAGCTGCGgttttagagctagaaatagcaagttaaaataag
855	NO02G03200	ccgggtccgattcccggtgcctgcaGGCATAGTTCTCCTTGTCGGgttttagagctagaaatagcaagttaaaataag
856	NO02G03210	ccgggtccgattcccggtgcctgcaGGGTTGAACATCGAGCTCGAgttttagagctagaaatagcaagttaaaataag
857	NO02G03220	ccgggtccgattcccggtgcctgcaGCACGTGCTTGATAATGGTGgttttagagctagaaatagcaagttaaaataag
858	NO02G03230	ccgggtccgattcccggtgcctgcaAAATTCGCTCCAAGTCAGAGgttttagagctagaaatagcaagttaaaataag
859	NO02G03240	ccgggtccgattcccggtgcctgcaGAGACAACTACGCTTCCTAGgttttagagctagaaatagcaagttaaaataag
860	NO02G03260	ccgggtccgattcccggtgcctgcaACTGTCTACTACGATCAGCAgttttagagctagaaatagcaagttaaaataag
861	NO02G03270	ccgggtccgattcccggtgcctgcaTACGATGGCAGGTAAGACAAgttttagagctagaaatagcaagttaaaataag
862	NO02G03280	ccgggtccgattcccggtgcctgcaGCTATTCAGGGCCGACACAAgttttagagctagaaatagcaagttaaaataag
863	NO02G03290	ccgggtccgattcccggtgcctgcaCTTACCGACGAAGGGAACGAgttttagagctagaaatagcaagttaaaataag
864	NO02G03300	ccgggtccgattcccggtgcctgcaACTTATTCCCGCTACCACTGgttttagagctagaaatagcaagttaaaataag
865	NO02G03310	ccgggtccgattcccggtgcctgcaAGGTTTGGAAATCCTCACCGgttttagagctagaaatagcaagttaaaataag
866	NO02G03320	ccgggtccgattcccggtgcctgcaTATTTAACGGGAGTGCACTGgttttagagctagaaatagcaagttaaaataag
867	NO02G03330	ccgggtccgattcccggtgcctgcaCAGTGTGCTTCCAGGAACGTgttttagagctagaaatagcaagttaaaataag
868	NO02G03340	ccgggtccgattcccggtgcctgcaAGAAGATATTGAGGGAATCGgttttagagctagaaatagcaagttaaaataag
869	NO02G03350	ccgggtccgattcccggtgcctgcaAGGTGGCCACCAGCTGCAGGgttttagagctagaaatagcaagttaaaataag
870	NO02G03370	ccgggtccgattcccggtgcctgcaATCCGCGCTGGTCTTGAAGCgttttagagctagaaatagcaagttaaaataag
871	NO02G03380	ccgggtccgattcccggtgcctgcaAATCCAGTTCTCCGACAACGgttttagagctagaaatagcaagttaaaataag
872	NO02G03390	ccgggtccgattcccggtgcctgcaATTGCAAGAGTACCAAGTTGgttttagagctagaaatagcaagttaaaataag
873	NO02G03400	ccgggtccgattcccggtgcctgcaGTGCCGAGTAGGTACAGTCGgttttagagctagaaatagcaagttaaaataag
874	NO02G03410	ccgggtccgattcccggtgcctgcaAGGCACACATTTCGTCCGGGgttttagagctagaaatagcaagttaaaataag
875	NO02G03420	ccgggtccgattcccggtgcctgcaAATGGAGGGGAATTCCACCGgttttagagctagaaatagcaagttaaaataag
876	NO02G03430	ccgggtccgattcccggtgcctgcaACTAGAAGGTGCGCTCAAGGgttttagagctagaaatagcaagttaaaataag
877	NO02G03440	ccgggtccgattcccggtgcctgcaGCAATAATGTCCATCAAACGgttttagagctagaaatagcaagttaaaataag
878	NO02G03450	ccgggtccgattcccggtgcctgcaGCTGGAGCGCCTTAAATGTGgttttagagctagaaatagcaagttaaaataag
879	NO02G03460	ccgggtccgattcccggtgcctgcaCCTGTCGAAATTAAGCAAGGgttttagagctagaaatagcaagttaaaataag
880	NO02G03470	ccgggtccgattcccggtgcctgcaGTCCTCAAACACTTCCGTGGgttttagagctagaaatagcaagttaaaataag
881	NO02G03480	ccgggtccgattcccggtgcctgcaTCGAGAATCAGCACTGTCAGgttttagagctagaaatagcaagttaaaataag
882	NO02G03490	ccgggtccgattcccggtgcctgcaAATAACGCCCAACATGTATGgttttagagctagaaatagcaagttaaaataag
883	NO02G03510	ccgggtccgattcccggtgcctgcaTCGTGCGGTTGAGTACCACGgttttagagctagaaatagcaagttaaaataag
884	NO02G03520	ccgggtccgattcccggtgcctgcaCTCCCATAGTGAGAGATGTGgttttagagctagaaatagcaagttaaaataag
885	NO02G03530	ccgggtccgattcccggtgcctgcaGACTAATACCAACCCCACGAgttttagagctagaaatagcaagttaaaataag
886	NO02G03540	ccgggtccgattcccggtgcctgcaTCGAAGCAGGAGGAGCCATGgttttagagctagaaatagcaagttaaaataag
887	NO02G03550	ccgggtccgattcccggtgcctgcaGTTGGCGTAATGATTCCACCgttttagagctagaaatagcaagttaaaataag
888	NO02G03560	ccgggtccgattcccggtgcctgcaAACAGTGGTAAGGTACACACgttttagagctagaaatagcaagttaaaataag
889	NO02G03570	ccgggtccgattcccggtgcctgcaTCAGGCTGTAACACATCACGgttttagagctagaaatagcaagttaaaataag
890	NO02G03580	ccgggtccgattcccggtgcctgcaGGGTTACAAGGACAGTGCTCgttttagagctagaaatagcaagttaaaataag
891	NO02G03590	ccgggtccgattcccggtgcctgcaGAAGAACGAGGTAAGCCATGgttttagagctagaaatagcaagttaaaataag
892	NO02G03600	ccgggtccgattcccggtgcctgcaATGCGTGCAAGGCAGCTTCGgttttagagctagaaatagcaagttaaaataag
893	NO02G03610	ccgggtccgattcccggtgcctgcaATGTGTATGATCGACGCGAGgttttagagctagaaatagcaagttaaaataag
894	NO02G03620	ccgggtccgattcccggtgcctgcaAGTGGATTCAGCATCATGGGgttttagagctagaaatagcaagttaaaataag
895	NO02G03630	ccgggtccgattcccggtgcctgcaACCACTAGGCATGAAGACAGgttttagagctagaaatagcaagttaaaataag
896	NO02G03640	ccgggtccgattcccggtgcctgcaGCTCGGAAAAAAGATACAGGgttttagagctagaaatagcaagttaaaataag
897	NO02G03650	ccgggtccgattcccggtgcctgcaGAATGGCGATGTCTTCTGGGgttttagagctagaaatagcaagttaaaataag
898	NO02G03660	ccgggtccgattcccggtgcctgcaATGAGCATCAAAGGACAGGGgttttagagctagaaatagcaagttaaaataag
899	NO02G03670	ccgggtccgattcccggtgcctgcaACAACAGTCAGTGACGTCGGgttttagagctagaaatagcaagttaaaataag
900	NO02G03680	ccgggtccgattcccggtgcctgcaGAGGTTACCAAGGCCACGGGgttttagagctagaaatagcaagttaaaataag
901	NO02G03700	ccgggtccgattcccggtgcctgcaGCTTGGAGGTAATATCAGCGgttttagagctagaaatagcaagttaaaataag
902	NO02G03720	ccgggtccgattcccggtgcctgcaCCGTCCCTCCCTGAACAGAGgttttagagctagaaatagcaagttaaaataag
903	NO02G03730	ccgggtccgattcccggtgcctgcaGCTTTGTGCAAATGAGCACGgttttagagctagaaatagcaagttaaaataag
904	NO02G03740	ccgggtccgattcccggtgcctgcaGAGCGCGTCTTGTCACAATGgttttagagctagaaatagcaagttaaaataag
905	NO02G03750	ccgggtccgattcccggtgcctgcaAAAGTGGAGGAACCAACCAAgttttagagctagaaatagcaagttaaaataag
906	NO02G03760	ccgggtccgattcccggtgcctgcaGATGTCACCGTAATCGACCAgttttagagctagaaatagcaagttaaaataag
907	NO02G03770	ccgggtccgattcccggtgcctgcaTCACGACCATCCCTTGACGCgttttagagctagaaatagcaagttaaaataag
908	NO02G03780	ccgggtccgattcccggtgcctgcaTCTATTCGTTGTGATCGAGGgttttagagctagaaatagcaagttaaaataag
909	NO02G03790	ccgggtccgattcccggtgcctgcaGAGAACTTTTCATCCTCGCGgttttagagctagaaatagcaagttaaaataag
910	NO02G03800	ccgggtccgattcccggtgcctgcaGGTAAAGAAGACAGACCGCGgttttagagctagaaatagcaagttaaaataag
911	NO02G03810	ccgggtccgattcccggtgcctgcaCGTCCAGTGAAACACCGTCGgttttagagctagaaatagcaagttaaaataag
912	NO02G03820	ccgggtccgattcccggtgcctgcaCCACCGTCAGTGCAGCCAGGgttttagagctagaaatagcaagttaaaataag
913	NO02G03840	ccgggtccgattcccggtgcctgcaGCGGCGACATGTTGTGTCAGgttttagagctagaaatagcaagttaaaataag
914	NO02G03850	ccgggtccgattcccggtgcctgcaACCATCTTAAAGACGTACGAgttttagagctagaaatagcaagttaaaataag
915	NO02G03860	ccgggtccgattcccggtgcctgcaCGGCTCAAGTTCGAGCACGGgttttagagctagaaatagcaagttaaaataag
916	NO02G03870	ccgggtccgattcccggtgcctgcaTTGTACCCCTCACTCAACAAgttttagagctagaaatagcaagttaaaataag
917	NO02G03880	ccgggtccgattcccggtgcctgcaGCCGTAGAGAGGCATTTGAGgttttagagctagaaatagcaagttaaaataag
918	NO02G03890	ccgggtccgattcccggtgcctgcaGTCCAGCCATAAAAGCACTGgttttagagctagaaatagcaagttaaaataag
919	NO02G03900	ccgggtccgattcccggtgcctgcaGCCTCAGTCGCATTACACGGgttttagagctagaaatagcaagttaaaataag
920	NO02G03910	ccgggtccgattcccggtgcctgcaTCGTCTAGAAGAAGAAACAGgttttagagctagaaatagcaagttaaaataag
921	NO02G03920	ccgggtccgattcccggtgcctgcaCGCACCATGCTGTTACGACGgttttagagctagaaatagcaagttaaaataag
922	NO02G03930	ccgggtccgattcccggtgcctgcaGATGCAGGTTGTTCGCAAGGgttttagagctagaaatagcaagttaaaataag
923	NO02G03940	ccgggtccgattcccggtgcctgcaCTTATACTGAAGGTGGTGAGgttttagagctagaaatagcaagttaaaataag
924	NO02G03950	ccgggtccgattcccggtgcctgcaCACTCCTGGTAAATAAGGTGgttttagagctagaaatagcaagttaaaataag
925	NO02G03960	ccgggtccgattcccggtgcctgcaTGGGGATGGTCACGCGAGAAgttttagagctagaaatagcaagttaaaataag
926	NO02G03970	ccgggtccgattcccggtgcctgcaGCACGCTTCATGCCCTCCAGgttttagagctagaaatagcaagttaaaataag
927	NO02G03980	ccgggtccgattcccggtgcctgcaCAACCAATCAGGAATCACCAgttttagagctagaaatagcaagttaaaataag
928	NO02G03990	ccgggtccgattcccggtgcctgcaAAGTTGGAAAGACCAGCTGGgttttagagctagaaatagcaagttaaaataag
929	NO02G04000	ccgggtccgattcccggtgcctgcaTCGCATTCAGAAGGACCTAGgttttagagctagaaatagcaagttaaaataag
930	NO02G04010	ccgggtccgattcccggtgcctgcaACAGTGTGACATTTGCTGTGgttttagagctagaaatagcaagttaaaataag
931	NO02G04020	ccgggtccgattcccggtgcctgcaCACGAAGGGAGAAACCCCAGgttttagagctagaaatagcaagttaaaataag
932	NO02G04030	ccgggtccgattcccggtgcctgcaACCATTTACCCCCACCCCAGgttttagagctagaaatagcaagttaaaataag
933	NO02G04040	ccgggtccgattcccggtgcctgcaTACTTGTATAGATTCGACCGgttttagagctagaaatagcaagttaaaataag
934	NO02G04050	ccgggtccgattcccggtgcctgcaACCTAGGTAGATGTCACCGAgttttagagctagaaatagcaagttaaaataag
935	NO02G04060	ccgggtccgattcccggtgcctgcaACACTCTACATGGACAGACAgttttagagctagaaatagcaagttaaaataag
936	NO02G04070	ccgggtccgattcccggtgcctgcaGGGCATCGAAACGTACAGGAgttttagagctagaaatagcaagttaaaataag
937	NO02G04080	ccgggtccgattcccggtgcctgcaTGAATGGTATGGGACCTACGgttttagagctagaaatagcaagttaaaataag
938	NO02G04090	ccgggtccgattcccggtgcctgcaGTGAGGATCCGCATACCCCGgttttagagctagaaatagcaagttaaaataag
939	NO02G04100	ccgggtccgattcccggtgcctgcaGCAGCATAAGCGTAAGATGTgttttagagctagaaatagcaagttaaaataag
940	NO02G04110	ccgggtccgattcccggtgcctgcaCACAACGAAGATCACCCGAGgttttagagctagaaatagcaagttaaaataag
941	NO02G04120	ccgggtccgattcccggtgcctgcaAAGTCAGAAAAGTACCCATGgttttagagctagaaatagcaagttaaaataag
942	NO02G04130	ccgggtccgattcccggtgcctgcaCGTTCCGAGAGCATCAAGCGgttttagagctagaaatagcaagttaaaataag
943	NO02G04140	ccgggtccgattcccggtgcctgcaCCATCAAAACCAATGCAGGGgttttagagctagaaatagcaagttaaaataag
944	NO02G04150	ccgggtccgattcccggtgcctgcaTGGATGGGAGATGATGATGTgttttagagctagaaatagcaagttaaaataag
945	NO02G04160	ccgggtccgattcccggtgcctgcaTGCATTGTGAAGGTGAACGTgttttagagctagaaatagcaagttaaaataag
946	NO02G04170	ccgggtccgattcccggtgcctgcaGATATCGACAGTCAACGCAAgttttagagctagaaatagcaagttaaaataag
947	NO02G04180	ccgggtccgattcccggtgcctgcaCAAGATTCTTAAGGACCCCGgttttagagctagaaatagcaagttaaaataag
948	NO02G04190	ccgggtccgattcccggtgcctgcaAAGTGGTCGAGAGCGCATGGgttttagagctagaaatagcaagttaaaataag
949	NO02G04200	ccgggtccgattcccggtgcctgcaGTCCGGGTTACATGTTACGGgttttagagctagaaatagcaagttaaaataag
950	NO02G04210	ccgggtccgattcccggtgcctgcaTGCGGCAATTTGATGATCCGgttttagagctagaaatagcaagttaaaataag
951	NO02G04220	ccgggtccgattcccggtgcctgcaCATTAAGTCCCTCTTTAGCGgttttagagctagaaatagcaagttaaaataag
952	NO02G04230	ccgggtccgattcccggtgcctgcaGATTGCCGATATCACTGACAgttttagagctagaaatagcaagttaaaataag
953	NO02G04240	ccgggtccgattcccggtgcctgcaATAATGGCTAATGCGCCTGGgttttagagctagaaatagcaagttaaaataag
954	NO02G04250	ccgggtccgattcccggtgcctgcaGAACTTGGAAGACCTGCTCGgttttagagctagaaatagcaagttaaaataag
955	NO02G04260	ccgggtccgattcccggtgcctgcaTCATGGCATCCACCTGACCGgttttagagctagaaatagcaagttaaaataag
956	NO02G04270	ccgggtccgattcccggtgcctgcaGGTAGTAGGAGCTTTTGTGGgttttagagctagaaatagcaagttaaaataag
957	NO02G04280	ccgggtccgattcccggtgcctgcaGCGCTCATTCTGGTACCATGgttttagagctagaaatagcaagttaaaataag
958	NO02G04290	ccgggtccgattcccggtgcctgcaAGGCCGGTTAGTGCTGTTGGgttttagagctagaaatagcaagttaaaataag
959	NO02G04300	ccgggtccgattcccggtgcctgcaATACGCGAATGTCTGGAGGGgttttagagctagaaatagcaagttaaaataag
960	NO02G04310	ccgggtccgattcccggtgcctgcaCCCTGATGGGATCGACAGCGgttttagagctagaaatagcaagttaaaataag
961	NO02G04320	ccgggtccgattcccggtgcctgcaGTTCCAAAGCGAAGACGACGgttttagagctagaaatagcaagttaaaataag
962	NO02G04330	ccgggtccgattcccggtgcctgcaCGATCTGCCAGGAAGCGAAGgttttagagctagaaatagcaagttaaaataag
963	NO02G04340	ccgggtccgattcccggtgcctgcaCATCATCCAACAAAGAAGCAgttttagagctagaaatagcaagttaaaataag
964	NO02G04350	ccgggtccgattcccggtgcctgcaGGACGGTGCAGATATTCACGgttttagagctagaaatagcaagttaaaataag
965	NO02G04360	ccgggtccgattcccggtgcctgcaAAACCAATTCACCAACCCGGgttttagagctagaaatagcaagttaaaataag
966	NO02G04370	ccgggtccgattcccggtgcctgcaTGTCTATGTATCCACCAAGGgttttagagctagaaatagcaagttaaaataag
967	NO02G04380	ccgggtccgattcccggtgcctgcaTCGCGCAAGGTGATAGATGGgttttagagctagaaatagcaagttaaaataag
968	NO02G04390	ccgggtccgattcccggtgcctgcaTGACGAAGCAGTGACCAGAGgttttagagctagaaatagcaagttaaaataag
969	NO02G04400	ccgggtccgattcccggtgcctgcaAGCATGACTGAGTAATAAGGgttttagagctagaaatagcaagttaaaataag
970	NO02G04410	ccgggtccgattcccggtgcctgcaCACCCAAGCGATGATCACAAgttttagagctagaaatagcaagttaaaataag
971	NO02G04420	ccgggtccgattcccggtgcctgcaGGTTCCCATGAAAAACACAAgttttagagctagaaatagcaagttaaaataag
972	NO02G04430	ccgggtccgattcccggtgcctgcaGTCACCGATTTAAGGCCAAGgttttagagctagaaatagcaagttaaaataag
973	NO02G04440	ccgggtccgattcccggtgcctgcaAGCTGTGGGCATGTCCCGTGgttttagagctagaaatagcaagttaaaataag
974	NO02G04450	ccgggtccgattcccggtgcctgcaTGACGGTTTCAATGACACCCgttttagagctagaaatagcaagttaaaataag
975	NO02G04460	ccgggtccgattcccggtgcctgcaGGGCAGATAAAGTCATACGTgttttagagctagaaatagcaagttaaaataag
976	NO02G04470	ccgggtccgattcccggtgcctgcaGCTGGCAAACATGAGCACGAgttttagagctagaaatagcaagttaaaataag
977	NO02G04480	ccgggtccgattcccggtgcctgcaAGCCCTACTCCTCCACCAGGgttttagagctagaaatagcaagttaaaataag
978	NO02G04500	ccgggtccgattcccggtgcctgcaAGCCATTACAGCGCTGACAGgttttagagctagaaatagcaagttaaaataag
979	NO02G04510	ccgggtccgattcccggtgcctgcaGAACCATCGGTACTGTACGAgttttagagctagaaatagcaagttaaaataag
980	NO02G04520	ccgggtccgattcccggtgcctgcaGTCCTCTTCTTGGAGCAAGGgttttagagctagaaatagcaagttaaaataag
981	NO02G04530	ccgggtccgattcccggtgcctgcaCAGCAGGTACAACTTGAGCAgttttagagctagaaatagcaagttaaaataag
982	NO02G04540	ccgggtccgattcccggtgcctgcaAAACAGTACGTTGGGCAAGGgttttagagctagaaatagcaagttaaaataag
983	NO02G04550	ccgggtccgattcccggtgcctgcaAAAGGACCCAGCATCTCGTGgttttagagctagaaatagcaagttaaaataag
984	NO02G04560	ccgggtccgattcccggtgcctgcaTAGGCGACAATGAAGTCTTGgttttagagctagaaatagcaagttaaaataag
985	NO02G04570	ccgggtccgattcccggtgcctgcaCAAATGCTTCAAAGACACTGgttttagagctagaaatagcaagttaaaataag
986	NO02G04580	ccgggtccgattcccggtgcctgcaGTCGAATGCTGAGAGCACACgttttagagctagaaatagcaagttaaaataag
987	NO02G04590	ccgggtccgattcccggtgcctgcaTGCAGACGAGGATCCTCACGgttttagagctagaaatagcaagttaaaataag
988	NO02G04600	ccgggtccgattcccggtgcctgcaCATCCCCAAGGGTGGCACCGgttttagagctagaaatagcaagttaaaataag
989	NO02G04610	ccgggtccgattcccggtgcctgcaAACCCACAAAGACAATGATGgttttagagctagaaatagcaagttaaaataag
990	NO02G04620	ccgggtccgattcccggtgcctgcaCTCGACGTATGATCTCTCAGgttttagagctagaaatagcaagttaaaataag
991	NO02G04630	ccgggtccgattcccggtgcctgcaTTTCTTTTCGCCAATCACGAgttttagagctagaaatagcaagttaaaataag
992	NO02G04640	ccgggtccgattcccggtgcctgcaCTTTATCACATCCTCGGGCAgttttagagctagaaatagcaagttaaaataag
993	NO02G04650	ccgggtccgattcccggtgcctgcaTATTCATTAGAGACGAGGGAgttttagagctagaaatagcaagttaaaataag
994	NO02G04660	ccgggtccgattcccggtgcctgcaCAGGCACAAACTCCTCGACGgttttagagctagaaatagcaagttaaaataag
995	NO02G04670	ccgggtccgattcccggtgcctgcaGATGAAGACGATGTCCTGTGgttttagagctagaaatagcaagttaaaataag
996	NO02G04680	ccgggtccgattcccggtgcctgcaATGCTCTGGTTGAATGTCAGgttttagagctagaaatagcaagttaaaataag
997	NO02G04690	ccgggtccgattcccggtgcctgcaTCTTGAGCACAAGCTAACGAgttttagagctagaaatagcaagttaaaataag
998	NO02G04700	ccgggtccgattcccggtgcctgcaGCCTAAGAATCCGTTCTGTGgttttagagctagaaatagcaagttaaaataag
999	NO02G04710	ccgggtccgattcccggtgcctgcaGAGTGAGGAAGGATGCCAGTgttttagagctagaaatagcaagttaaaataag
1000	NO02G04720	ccgggtccgattcccggtgcctgcaCTGCCGCGAAGAACTGATCGgttttagagctagaaatagcaagttaaaataag
1001	NO02G04730	ccgggtccgattcccggtgcctgcaCGCGTCTTCAAGAAACAAGGgttttagagctagaaatagcaagttaaaataag
1002	NO02G04740	ccgggtccgattcccggtgcctgcaACCCACACGCCCGACCACAGgttttagagctagaaatagcaagttaaaataag
1003	NO02G04750	ccgggtccgattcccggtgcctgcaTTGTCCTGAGCTCGTTCCTGgttttagagctagaaatagcaagttaaaataag
1004	NO02G04780	ccgggtccgattcccggtgcctgcaGTGACGTGTCTCTTCACCTGgttttagagctagaaatagcaagttaaaataag
1005	NO02G04790	ccgggtccgattcccggtgcctgcaGGACGTATATTGGCGAAACGgttttagagctagaaatagcaagttaaaataag
1006	NO02G04800	ccgggtccgattcccggtgcctgcaTTATTCCAGAGTCATACCAGgttttagagctagaaatagcaagttaaaataag
1007	NO02G04810	ccgggtccgattcccggtgcctgcaTCGACAGCTACCACATCCGGgttttagagctagaaatagcaagttaaaataag
1008	NO02G04820	ccgggtccgattcccggtgcctgcaCTTCTTGTGAGAAGACCCCGgttttagagctagaaatagcaagttaaaataag
1009	NO02G04830	ccgggtccgattcccggtgcctgcaAATTTCTACAGGTTTCTGCGgttttagagctagaaatagcaagttaaaataag
1010	NO02G04850	ccgggtccgattcccggtgcctgcaAACAGCGAAGGTGAAATCTGgttttagagctagaaatagcaagttaaaataag
1011	NO02G04860	ccgggtccgattcccggtgcctgcaCAAGGTACACACAACTACGGgttttagagctagaaatagcaagttaaaataag
1012	NO02G04870	ccgggtccgattcccggtgcctgcaGCATCGGGGGCAAATCCAAGgttttagagctagaaatagcaagttaaaataag
1013	NO02G04880	ccgggtccgattcccggtgcctgcaTGACTACGAACTTGCCATCAgttttagagctagaaatagcaagttaaaataag
1014	NO02G04890	ccgggtccgattcccggtgcctgcaATGTTGTTAGCTCGTGCCGGgttttagagctagaaatagcaagttaaaataag
1015	NO02G04910	ccgggtccgattcccggtgcctgcaTGTCCTGGGGATACCGAACGgttttagagctagaaatagcaagttaaaataag
1016	NO02G04920	ccgggtccgattcccggtgcctgcaGCTCGCATTAGGGCTCAAGGgttttagagctagaaatagcaagttaaaataag
1017	NO02G04930	ccgggtccgattcccggtgcctgcaTGAACAGCACTCCCTTTCGAgttttagagctagaaatagcaagttaaaataag
1018	NO02G04940	ccgggtccgattcccggtgcctgcaCCAGCTCCTCCTCAACCGAGgttttagagctagaaatagcaagttaaaataag
1019	NO02G04950	ccgggtccgattcccggtgcctgcaAAACTGCAAGAAAACAAAAGgttttagagctagaaatagcaagttaaaataag
1020	NO02G04960	ccgggtccgattcccggtgcctgcaACACCCTTTGCTATCTCAAGgttttagagctagaaatagcaagttaaaataag
1021	NO02G04970	ccgggtccgattcccggtgcctgcaAATGTGATGATGACCCACTTgttttagagctagaaatagcaagttaaaataag
1022	NO02G04980	ccgggtccgattcccggtgcctgcaATGGCTGCCGTTCCACAATGgttttagagctagaaatagcaagttaaaataag
1023	NO02G04990	ccgggtccgattcccggtgcctgcaGCAGCAACGAGAGCACTCCGgttttagagctagaaatagcaagttaaaataag
1024	NO02G05000	ccgggtccgattcccggtgcctgcaTGCCACGGGAAATTGTACAGgttttagagctagaaatagcaagttaaaataag
1025	NO02G05010	ccgggtccgattcccggtgcctgcaCAATCTACGTCACGACCACGgttttagagctagaaatagcaagttaaaataag
1026	NO02G05020	ccgggtccgattcccggtgcctgcaAATCTTAAATACCTTCCCGGgttttagagctagaaatagcaagttaaaataag
1027	NO02G05030	ccgggtccgattcccggtgcctgcaGTGTACAAGGAACGACTGAGgttttagagctagaaatagcaagttaaaataag
1028	NO02G05040	ccgggtccgattcccggtgcctgcaGATTCCACAGTAGGTACCGGgttttagagctagaaatagcaagttaaaataag
1029	NO02G05050	ccgggtccgattcccggtgcctgcaGCGCCGCTAAGGAAGTGTTGgttttagagctagaaatagcaagttaaaataag
1030	NO02G05060	ccgggtccgattcccggtgcctgcaCGCAGCGATTTCATCCACGGgttttagagctagaaatagcaagttaaaataag
1031	NO02G05070	ccgggtccgattcccggtgcctgcaGTAACTGAATCAATGCGCTGgttttagagctagaaatagcaagttaaaataag
1032	NO02G05080	ccgggtccgattcccggtgcctgcaAAGGCTGACAGCTCGCCGTGgttttagagctagaaatagcaagttaaaataag
1033	NO02G05090	ccgggtccgattcccggtgcctgcaCTTCCAAGACAATGACCCGGgttttagagctagaaatagcaagttaaaataag
1034	NO02G05100	ccgggtccgattcccggtgcctgcaCCAACTGGTCAAAAACGTGTgttttagagctagaaatagcaagttaaaataag
1035	NO02G05110	ccgggtccgattcccggtgcctgcaGATCTTTGGAAATAGCATGGgttttagagctagaaatagcaagttaaaataag
1036	NO02G05130	ccgggtccgattcccggtgcctgcaCATGTGTGCGAAACGCCAGAgttttagagctagaaatagcaagttaaaataag
1037	NO02G05140	ccgggtccgattcccggtgcctgcaCAAGGCTGAAGAATGGACGTgttttagagctagaaatagcaagttaaaataag
1038	NO02G05150	ccgggtccgattcccggtgcctgcaTGAGGTCTTCAGATACTCTGgttttagagctagaaatagcaagttaaaataag
1039	NO02G05160	ccgggtccgattcccggtgcctgcaATAGGGAAGAATCAAAACGTgttttagagctagaaatagcaagttaaaataag
1040	NO02G05170	ccgggtccgattcccggtgcctgcaTCCTTGTAGGAACATCCCGGgttttagagctagaaatagcaagttaaaataag
1041	NO02G05180	ccgggtccgattcccggtgcctgcaAACTGTTGTGAGGAATGCAAgttttagagctagaaatagcaagttaaaataag
1042	NO02G05200	ccgggtccgattcccggtgcctgcaGATATGGAATTCTTCGAGAGgttttagagctagaaatagcaagttaaaataag
1043	NO02G05210	ccgggtccgattcccggtgcctgcaGAAGCGGAAACGTACCGATGgttttagagctagaaatagcaagttaaaataag
1044	NO02G05220	ccgggtccgattcccggtgcctgcaCCACCACTTGACGATTAGAGgttttagagctagaaatagcaagttaaaataag
1045	NO02G05230	ccgggtccgattcccggtgcctgcaGTTGTGGCGACGTTGACTGGgttttagagctagaaatagcaagttaaaataag
1046	NO02G05240	ccgggtccgattcccggtgcctgcaCTTTGACGACGATCAGAGCGgttttagagctagaaatagcaagttaaaataag
1047	NO02G05250	ccgggtccgattcccggtgcctgcaGGAGAGCTTGCGGATTTCGAgttttagagctagaaatagcaagttaaaataag
1048	NO02G05260	ccgggtccgattcccggtgcctgcaGTGCCGTTGATGAGATGGTGgttttagagctagaaatagcaagttaaaataag
1049	NO02G05270	ccgggtccgattcccggtgcctgcaCGATGCTGTGATGACAATGGgttttagagctagaaatagcaagttaaaataag
1050	NO02G05280	ccgggtccgattcccggtgcctgcaCTTCGCCGTATTCGGCCCGGgttttagagctagaaatagcaagttaaaataag
1051	NO02G05290	ccgggtccgattcccggtgcctgcaGCAGTTTGTCGAGTTCCTCGgttttagagctagaaatagcaagttaaaataag
1052	NO02G05300	ccgggtccgattcccggtgcctgcaACCCATCGGAAAATTCAATGgttttagagctagaaatagcaagttaaaataag
1053	NO02G05310	ccgggtccgattcccggtgcctgcaCGGATGGTACACACACCCCAgttttagagctagaaatagcaagttaaaataag
1054	NO02G05320	ccgggtccgattcccggtgcctgcaGCAGGTCTCACATATCCACAgttttagagctagaaatagcaagttaaaataag
1055	NO02G05330	ccgggtccgattcccggtgcctgcaCGTCTCATAGAACTTGACGAgttttagagctagaaatagcaagttaaaataag
1056	NO02G05340	ccgggtccgattcccggtgcctgcaTGGGGACATAGAGTCGACGAgttttagagctagaaatagcaagttaaaataag
1057	NO02G05350	ccgggtccgattcccggtgcctgcaTAAGGGCGCCAATAGCATTGgttttagagctagaaatagcaagttaaaataag
1058	NO02G05360	ccgggtccgattcccggtgcctgcaCGACCAAGATGATCGTGTCGgttttagagctagaaatagcaagttaaaataag
1059	NO02G05370	ccgggtccgattcccggtgcctgcaTCTACCTCCACTTTGAACTGgttttagagctagaaatagcaagttaaaataag
1060	NO02G05380	ccgggtccgattcccggtgcctgcaACACAAAACAACGAAATTGGgttttagagctagaaatagcaagttaaaataag
1061	NO02G05390	ccgggtccgattcccggtgcctgcaATTGCATCCCGAATACGGCGgttttagagctagaaatagcaagttaaaataag
1062	NO02G05400	ccgggtccgattcccggtgcctgcaAGGTTGCTGGTGATGCATGAgttttagagctagaaatagcaagttaaaataag
1063	NO02G05410	ccgggtccgattcccggtgcctgcaAGACACGTTGGATGTGACCAgttttagagctagaaatagcaagttaaaataag
1064	NO02G05420	ccgggtccgattcccggtgcctgcaCGGTGCGGCTATCTTCCTGAgttttagagctagaaatagcaagttaaaataag
1065	NO02G05430	ccgggtccgattcccggtgcctgcaACCGCCCGAAATGCTCGTGGgttttagagctagaaatagcaagttaaaataag
1066	NO02G05440	ccgggtccgattcccggtgcctgcaGTTCCCAAGGAGCTCATCCCgttttagagctagaaatagcaagttaaaataag
1067	NO02G05490	ccgggtccgattcccggtgcctgcaGGTGACAGACTTCCGGGCGAgttttagagctagaaatagcaagttaaaataag
1068	NO02G05500	ccgggtccgattcccggtgcctgcaCTCTCTCCAACCCAGCACAGgttttagagctagaaatagcaagttaaaataag
1069	NO02G05510	ccgggtccgattcccggtgcctgcaGGCGCGTAGACATGGTAGGGgttttagagctagaaatagcaagttaaaataag
1070	NO02G05520	ccgggtccgattcccggtgcctgcaGGGCCGTTAAGACCGACACAgttttagagctagaaatagcaagttaaaataag
1071	NO02G05530	ccgggtccgattcccggtgcctgcaGCTGTGAAGACAAATTCATGgttttagagctagaaatagcaagttaaaataag
1072	NO02G05540	ccgggtccgattcccggtgcctgcaTGACCAGCAAGGGATACCAGgttttagagctagaaatagcaagttaaaataag
1073	NO02G05550	ccgggtccgattcccggtgcctgcaATTGTCGACATGTTGCTCGGgttttagagctagaaatagcaagttaaaataag
1074	NO02G05560	ccgggtccgattcccggtgcctgcaCTCCCCATAAAACTTCAACAgttttagagctagaaatagcaagttaaaataag
1075	NO02G05570	ccgggtccgattcccggtgcctgcaGCCTGCCAAAGTGACGACGTgttttagagctagaaatagcaagttaaaataag
1076	NO02G05580	ccgggtccgattcccggtgcctgcaTACCTCGGAAGACAAGAAAGgttttagagctagaaatagcaagttaaaataag
1077	NO02G05590	ccgggtccgattcccggtgcctgcaATGGTACTTTGAGCATACGTgttttagagctagaaatagcaagttaaaataag
1078	NO02G05600	ccgggtccgattcccggtgcctgcaTCACAGTACCATCTACAACGgttttagagctagaaatagcaagttaaaataag
1079	NO02G05610	ccgggtccgattcccggtgcctgcaTGGGCAATATAAAAGCAGCAgttttagagctagaaatagcaagttaaaataag
1080	NO02G05620	ccgggtccgattcccggtgcctgcaGGCCGAATTAGGATTTGGGGgttttagagctagaaatagcaagttaaaataag
1081	NO02G05630	ccgggtccgattcccggtgcctgcaTCCACATTTAATGCACCCGAgttttagagctagaaatagcaagttaaaataag
1082	NO02G05640	ccgggtccgattcccggtgcctgcaAGGGATTTGCTGTCTCAGGGgttttagagctagaaatagcaagttaaaataag
1083	NO02G05650	ccgggtccgattcccggtgcctgcaAATATGCCCATGGAGCGGCGgttttagagctagaaatagcaagttaaaataag
1084	NO02G05660	ccgggtccgattcccggtgcctgcaCAGCGATAGTGGCAGCAAGGgttttagagctagaaatagcaagttaaaataag
1085	NO02G05670	ccgggtccgattcccggtgcctgcaGCTTCCCAGAATAACCACCGgttttagagctagaaatagcaagttaaaataag
1086	NO02G05680	ccgggtccgattcccggtgcctgcaGGAGGGTAATAAGTACCGGGgttttagagctagaaatagcaagttaaaataag
1087	NO02G05690	ccgggtccgattcccggtgcctgcaTATCTGTGGCGTGCGAGACGgttttagagctagaaatagcaagttaaaataag
1088	NO02G05700	ccgggtccgattcccggtgcctgcaGGAATCATCTAGGGTGACAGgttttagagctagaaatagcaagttaaaataag
1089	NO02G05710	ccgggtccgattcccggtgcctgcaGCAGCACCTTGGAGACCGAGgttttagagctagaaatagcaagttaaaataag
1090	NO02G05720	ccgggtccgattcccggtgcctgcaGGGCGATGATATTGGCCCAGgttttagagctagaaatagcaagttaaaataag
1091	NO02G05730	ccgggtccgattcccggtgcctgcaGGGCATTTAACCAGATCGTGgttttagagctagaaatagcaagttaaaataag
1092	NO02G05740	ccgggtccgattcccggtgcctgcaCTACAGGGGGAAAAGAACGAgttttagagctagaaatagcaagttaaaataag
1093	NO02G05750	ccgggtccgattcccggtgcctgcaGCCCTGCATCACTATCTGCAgttttagagctagaaatagcaagttaaaataag
1094	NO02G05760	ccgggtccgattcccggtgcctgcaAGAAAAGTTGGAGATCCCGGgttttagagctagaaatagcaagttaaaataag
1095	NO02G05770	ccgggtccgattcccggtgcctgcaACAAACCACCAATAAGACGCgttttagagctagaaatagcaagttaaaataag
1096	NO02G05780	ccgggtccgattcccggtgcctgcaCATCGACATCGTGAGCACAGgttttagagctagaaatagcaagttaaaataag
1097	NO02G05800	ccgggtccgattcccggtgcctgcaACTGCACCAAGACAGCCCCGgttttagagctagaaatagcaagttaaaataag
1098	NO02G05810	ccgggtccgattcccggtgcctgcaTGCGGCCAAGAAAGACACCGgttttagagctagaaatagcaagttaaaataag
1099	NO02G05820	ccgggtccgattcccggtgcctgcaCATCACCAAGCGTCTCATCGgttttagagctagaaatagcaagttaaaataag
1100	NO02G05830	ccgggtccgattcccggtgcctgcaATCGCCTATGGTATACAACGgttttagagctagaaatagcaagttaaaataag
1101	NO02G05840	ccgggtccgattcccggtgcctgcaGTGCTCGCATACGATGAAGGgttttagagctagaaatagcaagttaaaataag
1102	NO02G05850	ccgggtccgattcccggtgcctgcaACTTACCAATATCTGCACCAgttttagagctagaaatagcaagttaaaataag
1103	NO02G05860	ccgggtccgattcccggtgcctgcaGGTGGACACTGATGCTGCCAgttttagagctagaaatagcaagttaaaataag
1104	NO02G05870	ccgggtccgattcccggtgcctgcaCTGGGACGTAGTCAGTACCGgttttagagctagaaatagcaagttaaaataag
1105	NO02G05880	ccgggtccgattcccggtgcctgcaTGTCGTGGAAATGAGCGACGgttttagagctagaaatagcaagttaaaataag
1106	NO02G05890	ccgggtccgattcccggtgcctgcaAGAACCGAACACAGTATCAGgttttagagctagaaatagcaagttaaaataag
1107	NO02G05900	ccgggtccgattcccggtgcctgcaCCACCGCCATCATCACCCCGgttttagagctagaaatagcaagttaaaataag
1108	NO02G05910	ccgggtccgattcccggtgcctgcaTACGTCGTTGACAGCAGCGGgttttagagctagaaatagcaagttaaaataag
1109	NO02G05930	ccgggtccgattcccggtgcctgcaATGGGTCTTTTCGACGACAAgttttagagctagaaatagcaagttaaaataag
1110	NO02G05940	ccgggtccgattcccggtgcctgcaTCGTCGAACCCAAGAAGACGgttttagagctagaaatagcaagttaaaataag
1111	NO02G05950	ccgggtccgattcccggtgcctgcaGCATTGCATGAAGAAGTCTGgttttagagctagaaatagcaagttaaaataag
1112	NO02G05960	ccgggtccgattcccggtgcctgcaCAGCACCTTTAGCGACAATGgttttagagctagaaatagcaagttaaaataag
1113	NO02G05970	ccgggtccgattcccggtgcctgcaGAGAGTCAAAACGACGCTCAgttttagagctagaaatagcaagttaaaataag
1114	NO02G05980	ccgggtccgattcccggtgcctgcaGAGCGTATGGATCTATTGGAgttttagagctagaaatagcaagttaaaataag
1115	NO02G05990	ccgggtccgattcccggtgcctgcaGGTGGGCTTGACAAAAGCGGgttttagagctagaaatagcaagttaaaataag
1116	NO02G06000	ccgggtccgattcccggtgcctgcaCATGCTTAATGCCATCACGGgttttagagctagaaatagcaagttaaaataag
1117	NO02G06010	ccgggtccgattcccggtgcctgcaGACACGTCTTCTGGGTGCCAgttttagagctagaaatagcaagttaaaataag
1118	NO02G06020	ccgggtccgattcccggtgcctgcaCGGTGGGCGTAGCATCACTGgttttagagctagaaatagcaagttaaaataag
1119	NO02G06030	ccgggtccgattcccggtgcctgcaGGGGAGGTCGGATAGTTTCGgttttagagctagaaatagcaagttaaaataag
1120	NO02G06040	ccgggtccgattcccggtgcctgcaCTCTGCGTCCATATTCGACGgttttagagctagaaatagcaagttaaaataag
1121	NO02G06050	ccgggtccgattcccggtgcctgcaCATGCCCAACTTTCGCACGGgttttagagctagaaatagcaagttaaaataag
1122	NO02G06060	ccgggtccgattcccggtgcctgcaTATGCACAAGCCCATTACGTgttttagagctagaaatagcaagttaaaataag
1123	NO02G06070	ccgggtccgattcccggtgcctgcaCGGCTACGACGAAATCACGAgttttagagctagaaatagcaagttaaaataag
1124	NO02G06080	ccgggtccgattcccggtgcctgcaGCTATGCAGACCCAATATGGgttttagagctagaaatagcaagttaaaataag
1125	NO02G06120	ccgggtccgattcccggtgcctgcaGTGGATGTCAGTAGCTCTCAgttttagagctagaaatagcaagttaaaataag
1126	NO02G06130	ccgggtccgattcccggtgcctgcaCCCATCTCGATAGATCTCAGgttttagagctagaaatagcaagttaaaataag
1127	NO02G06140	ccgggtccgattcccggtgcctgcaTTATGTACGAGACGTCACCGgttttagagctagaaatagcaagttaaaataag
1128	NO02G06150	ccgggtccgattcccggtgcctgcaACCACCAGCGATTGCCAGGGgttttagagctagaaatagcaagttaaaataag
1129	NO02G06160	ccgggtccgattcccggtgcctgcaTGCGTACTCCAACGATTACGgttttagagctagaaatagcaagttaaaataag
1130	NO02G06170	ccgggtccgattcccggtgcctgcaTCTTGCTCCGAATACCACCAgttttagagctagaaatagcaagttaaaataag
1131	NO02G06180	ccgggtccgattcccggtgcctgcaGAAAGATATCACGAGCGTGGgttttagagctagaaatagcaagttaaaataag
1132	NO02G06190	ccgggtccgattcccggtgcctgcaTGAACATGAAGTGGGCCTGGgttttagagctagaaatagcaagttaaaataag
1133	NO02G06200	ccgggtccgattcccggtgcctgcaTTGGAGTGCAGACCTCGACGgttttagagctagaaatagcaagttaaaataag
1134	NO03G00010	ccgggtccgattcccggtgcctgcaTCTCCAGCAAGCGAGCAGGGgttttagagctagaaatagcaagttaaaataag
1135	NO03G00020	ccgggtccgattcccggtgcctgcaGGTTTTGTCGCAGATGACGGgttttagagctagaaatagcaagttaaaataag
1136	NO03G00030	ccgggtccgattcccggtgcctgcaTGAGGATGTGGTACTCGAGAgttttagagctagaaatagcaagttaaaataag
1137	NO03G00040	ccgggtccgattcccggtgcctgcaGGCACTACTTGCTTCCACGGgttttagagctagaaatagcaagttaaaataag
1138	NO03G00060	ccgggtccgattcccggtgcctgcaGCTGCTCCTTGAGTTCACAGgttttagagctagaaatagcaagttaaaataag
1139	NO03G00070	ccgggtccgattcccggtgcctgcaCAGACAGTACGAGAACACTGgttttagagctagaaatagcaagttaaaataag
1140	NO03G00080	ccgggtccgattcccggtgcctgcaATGATTCCAGAACCGCTTCGgttttagagctagaaatagcaagttaaaataag
1141	NO03G00090	ccgggtccgattcccggtgcctgcaGGACGAGCGCCATAGGTTGGgttttagagctagaaatagcaagttaaaataag
1142	NO03G00110	ccgggtccgattcccggtgcctgcaGCGAGCAGCGATACCCAAGGgttttagagctagaaatagcaagttaaaataag
1143	NO03G00120	ccgggtccgattcccggtgcctgcaAGAAGCGCTCGATACCCGCGgttttagagctagaaatagcaagttaaaataag
1144	NO03G00130	ccgggtccgattcccggtgcctgcaGTTATCCTCAGCATGGCCGGgttttagagctagaaatagcaagttaaaataag
1145	NO03G00140	ccgggtccgattcccggtgcctgcaCTTTCTCATCGATCAATGGGgttttagagctagaaatagcaagttaaaataag
1146	NO03G00150	ccgggtccgattcccggtgcctgcaGAGGCAATGAATGCCCAGCGgttttagagctagaaatagcaagttaaaataag
1147	NO03G00160	ccgggtccgattcccggtgcctgcaCCAGGCGCTTCTGAATGCGGgttttagagctagaaatagcaagttaaaataag
1148	NO03G00170	ccgggtccgattcccggtgcctgcaCCGCCTTACTATCAACGACGgttttagagctagaaatagcaagttaaaataag
1149	NO03G00180	ccgggtccgattcccggtgcctgcaTCGGCCCAGACCGATCAAAGgttttagagctagaaatagcaagttaaaataag
1150	NO03G00190	ccgggtccgattcccggtgcctgcaTTAGCAAAGACGGTTGTGGGgttttagagctagaaatagcaagttaaaataag
1151	NO03G00200	ccgggtccgattcccggtgcctgcaACAATCACAGGCTTGCCCTGgttttagagctagaaatagcaagttaaaataag
1152	NO03G00210	ccgggtccgattcccggtgcctgcaGCAGTTCATCGACTTACCGGgttttagagctagaaatagcaagttaaaataag
1153	NO03G00220	ccgggtccgattcccggtgcctgcaCGTGGTCTACCCTCACACCGgttttagagctagaaatagcaagttaaaataag
1154	NO03G00230	ccgggtccgattcccggtgcctgcaGGCCGCAAAGGAGAAGCGAAgttttagagctagaaatagcaagttaaaataag
1155	NO03G00260	ccgggtccgattcccggtgcctgcaAGGCCTCGTTGATCTCACTGgttttagagctagaaatagcaagttaaaataag
1156	NO03G00270	ccgggtccgattcccggtgcctgcaCTCCAACCAGAACAACCGCGgttttagagctagaaatagcaagttaaaataag
1157	NO03G00280	ccgggtccgattcccggtgcctgcaTTGCATGAATACGTGCTCAAgttttagagctagaaatagcaagttaaaataag
1158	NO03G00290	ccgggtccgattcccggtgcctgcaGGAACCCCTTGTTCAGGCCAgttttagagctagaaatagcaagttaaaataag
1159	NO03G00300	ccgggtccgattcccggtgcctgcaGTATTGAGGCTAGAGGAAAGgttttagagctagaaatagcaagttaaaataag
1160	NO03G00310	ccgggtccgattcccggtgcctgcaATACGCGAGTCACCTACCAAgttttagagctagaaatagcaagttaaaataag
1161	NO03G00320	ccgggtccgattcccggtgcctgcaTGCTTGTATGAAACTGGTCGgttttagagctagaaatagcaagttaaaataag
1162	NO03G00330	ccgggtccgattcccggtgcctgcaCCTCCTCAAGATCGAAACGAgttttagagctagaaatagcaagttaaaataag
1163	NO03G00340	ccgggtccgattcccggtgcctgcaATATATGGCAACGAACAAAGgttttagagctagaaatagcaagttaaaataag
1164	NO03G00350	ccgggtccgattcccggtgcctgcaGAGGTACTCGTCATTCAGCAgttttagagctagaaatagcaagttaaaataag
1165	NO03G00360	ccgggtccgattcccggtgcctgcaGCAGCAACGTAAGAGTGGGGgttttagagctagaaatagcaagttaaaataag
1166	NO03G00370	ccgggtccgattcccggtgcctgcaCGCTGCGCAAGAACTCCAGGgttttagagctagaaatagcaagttaaaataag
1167	NO03G00380	ccgggtccgattcccggtgcctgcaTTAGAAGAAAGCGATCCTTGgttttagagctagaaatagcaagttaaaataag
1168	NO03G00390	ccgggtccgattcccggtgcctgcaTTGAAAATGAGATAGATACGgttttagagctagaaatagcaagttaaaataag
1169	NO03G00400	ccgggtccgattcccggtgcctgcaCGTAATGGATACCAAGACCAgttttagagctagaaatagcaagttaaaataag
1170	NO03G00410	ccgggtccgattcccggtgcctgcaTCTCGCCTTGACCAAAACTGgttttagagctagaaatagcaagttaaaataag
1171	NO03G00420	ccgggtccgattcccggtgcctgcaCACGGGGTCCAGGTTCAGGTgttttagagctagaaatagcaagttaaaataag
1172	NO03G00430	ccgggtccgattcccggtgcctgcaCGTCGATCACTACAACCGCGgttttagagctagaaatagcaagttaaaataag
1173	NO03G00440	ccgggtccgattcccggtgcctgcaTCACTATCATATCCCTACGTgttttagagctagaaatagcaagttaaaataag
1174	NO03G00450	ccgggtccgattcccggtgcctgcaGACAGCTCTTTCGCTCCCTGgttttagagctagaaatagcaagttaaaataag
1175	NO03G00460	ccgggtccgattcccggtgcctgcaTGGAACAAGGAGTGCTGTGAgttttagagctagaaatagcaagttaaaataag
1176	NO03G00470	ccgggtccgattcccggtgcctgcaACCACAGCACAACCAGAAAGgttttagagctagaaatagcaagttaaaataag
1177	NO03G00480	ccgggtccgattcccggtgcctgcaGCGATAACGAAGAAAACGCCgttttagagctagaaatagcaagttaaaataag
1178	NO03G00490	ccgggtccgattcccggtgcctgcaGTACAAGTTCATAACCTGTGgttttagagctagaaatagcaagttaaaataag
1179	NO03G00500	ccgggtccgattcccggtgcctgcaTAAAGGCGTCGATACCAAAGgttttagagctagaaatagcaagttaaaataag
1180	NO03G00510	ccgggtccgattcccggtgcctgcaGAACATCAAGCTCCAGCACGgttttagagctagaaatagcaagttaaaataag
1181	NO03G00530	ccgggtccgattcccggtgcctgcaCAGAACAAGTCACAGAATGGgttttagagctagaaatagcaagttaaaataag
1182	NO03G00540	ccgggtccgattcccggtgcctgcaTGTAGGAACAGTTCTCGAGGgttttagagctagaaatagcaagttaaaataag
1183	NO03G00550	ccgggtccgattcccggtgcctgcaGGCATGATTGTCCCACCTAGgttttagagctagaaatagcaagttaaaataag
1184	NO03G00560	ccgggtccgattcccggtgcctgcaAGTCTCGCATGGACAACCCAgttttagagctagaaatagcaagttaaaataag
1185	NO03G00570	ccgggtccgattcccggtgcctgcaAAGAAGAGAAGGAATGCCCGgttttagagctagaaatagcaagttaaaataag
1186	NO03G00580	ccgggtccgattcccggtgcctgcaGGGCGCAAAGGCCACTACGTgttttagagctagaaatagcaagttaaaataag
1187	NO03G00600	ccgggtccgattcccggtgcctgcaCCTATCCAACATCTACACCTgttttagagctagaaatagcaagttaaaataag
1188	NO03G00610	ccgggtccgattcccggtgcctgcaGGATTCGCCCACACACTCGGgttttagagctagaaatagcaagttaaaataag
1189	NO03G00620	ccgggtccgattcccggtgcctgcaCTCTTCCTCATGCTTCAGGGgttttagagctagaaatagcaagttaaaataag
1190	NO03G00630	ccgggtccgattcccggtgcctgcaGTTCTCGACCGTTACGACGAgttttagagctagaaatagcaagttaaaataag
1191	NO03G00650	ccgggtccgattcccggtgcctgcaGCTTGCACGTCAAGAAACGAgttttagagctagaaatagcaagttaaaataag
1192	NO03G00660	ccgggtccgattcccggtgcctgcaGGAGTGTTACAACCTGACCTgttttagagctagaaatagcaagttaaaataag
1193	NO03G00670	ccgggtccgattcccggtgcctgcaGTAGCAACGTATGCTCATTGgttttagagctagaaatagcaagttaaaataag
1194	NO03G00680	ccgggtccgattcccggtgcctgcaTCAACAGAAGAAACGGCCGTgttttagagctagaaatagcaagttaaaataag
1195	NO03G00690	ccgggtccgattcccggtgcctgcaAACCACACTCTATCGCCATGgttttagagctagaaatagcaagttaaaataag
1196	NO03G00700	ccgggtccgattcccggtgcctgcaATATCGCGCCAGTACGACCAgttttagagctagaaatagcaagttaaaataag
1197	NO03G00710	ccgggtccgattcccggtgcctgcaCCTTATGAGGCAGTACCTCGgttttagagctagaaatagcaagttaaaataag
1198	NO03G00780	ccgggtccgattcccggtgcctgcaGTCACCAAGCTCAAATCCCGgttttagagctagaaatagcaagttaaaataag
1199	NO03G00790	ccgggtccgattcccggtgcctgcaCAGTCATATCGTCAGGAAAGgttttagagctagaaatagcaagttaaaataag
1200	NO03G00800	ccgggtccgattcccggtgcctgcaAGGAGATCGTAAATACGCCCgttttagagctagaaatagcaagttaaaataag
1201	NO03G00840	ccgggtccgattcccggtgcctgcaAAAAAAATCGACATCACCTGgttttagagctagaaatagcaagttaaaataag
1202	NO03G00860	ccgggtccgattcccggtgcctgcaCATGCTGAAGAAATGTAGCGgttttagagctagaaatagcaagttaaaataag
1203	NO03G00880	ccgggtccgattcccggtgcctgcaGGCAAAACTTCCTGTCACAGgttttagagctagaaatagcaagttaaaataag
1204	NO03G00890	ccgggtccgattcccggtgcctgcaGATGCCCACACGGTCTACGTgttttagagctagaaatagcaagttaaaataag
1205	NO03G00900	ccgggtccgattcccggtgcctgcaCTGGCTTGGGAGGAACCACAgttttagagctagaaatagcaagttaaaataag
1206	NO03G00910	ccgggtccgattcccggtgcctgcaGTGGGCACAAGAGCAAAACGgttttagagctagaaatagcaagttaaaataag
1207	NO03G00920	ccgggtccgattcccggtgcctgcaTTGGGATTACGTGTCCACCAgttttagagctagaaatagcaagttaaaataag
1208	NO03G00930	ccgggtccgattcccggtgcctgcaGCACCAGCAATCGATCAACAgttttagagctagaaatagcaagttaaaataag
1209	NO03G00940	ccgggtccgattcccggtgcctgcaGTAGGAGCGATAGGATCCGTgttttagagctagaaatagcaagttaaaataag
1210	NO03G00950	ccgggtccgattcccggtgcctgcaAAAGGGGGCGAGTGTCAAGGgttttagagctagaaatagcaagttaaaataag
1211	NO03G00960	ccgggtccgattcccggtgcctgcaGGTGGGAATCACCCTAAGCAgttttagagctagaaatagcaagttaaaataag
1212	NO03G00970	ccgggtccgattcccggtgcctgcaACAGCATGCCGACATCCAAGgttttagagctagaaatagcaagttaaaataag
1213	NO03G00980	ccgggtccgattcccggtgcctgcaAAGCTCCACTCGAGACCGAGgttttagagctagaaatagcaagttaaaataag
1214	NO03G00990	ccgggtccgattcccggtgcctgcaCGTGACGGGCATCCTTGACAgttttagagctagaaatagcaagttaaaataag
1215	NO03G01000	ccgggtccgattcccggtgcctgcaGTGTGTCATGAGTCAATGGGgttttagagctagaaatagcaagttaaaataag
1216	NO03G01010	ccgggtccgattcccggtgcctgcaGGCGGATTACGTCGTTCACCgttttagagctagaaatagcaagttaaaataag
1217	NO03G01020	ccgggtccgattcccggtgcctgcaGTTGGTCCAGCTCTACGACGgttttagagctagaaatagcaagttaaaataag
1218	NO03G01030	ccgggtccgattcccggtgcctgcaAATCAGCGTGCCTCTCAAAGgttttagagctagaaatagcaagttaaaataag
1219	NO03G01040	ccgggtccgattcccggtgcctgcaGCAAATACAAGCAAACCCCAgttttagagctagaaatagcaagttaaaataag
1220	NO03G01050	ccgggtccgattcccggtgcctgcaTAAGCTCAACAGAATTAGGGgttttagagctagaaatagcaagttaaaataag
1221	NO03G01060	ccgggtccgattcccggtgcctgcaAAGCGCATAAGTGATTGTTGgttttagagctagaaatagcaagttaaaataag
1222	NO03G01070	ccgggtccgattcccggtgcctgcaTCTTTATGGGAAACTGAAGGgttttagagctagaaatagcaagttaaaataag
1223	NO03G01080	ccgggtccgattcccggtgcctgcaTGACACGAATGCTGGCAGGGgttttagagctagaaatagcaagttaaaataag
1224	NO03G01090	ccgggtccgattcccggtgcctgcaTGGTATGATATCAAGCAGCGgttttagagctagaaatagcaagttaaaataag
1225	NO03G01100	ccgggtccgattcccggtgcctgcaCAGAGACGCGCTGTGCATGGgttttagagctagaaatagcaagttaaaataag
1226	NO03G01110	ccgggtccgattcccggtgcctgcaTCGAGATTACATGGCCTGCGgttttagagctagaaatagcaagttaaaataag
1227	NO03G01120	ccgggtccgattcccggtgcctgcaTCCTCCGTCGCTCTCCACAGgttttagagctagaaatagcaagttaaaataag
1228	NO03G01130	ccgggtccgattcccggtgcctgcaTTGGCAAAGATACCTTGCAGgttttagagctagaaatagcaagttaaaataag
1229	NO03G01140	ccgggtccgattcccggtgcctgcaGTATGACTCGTAGATTCGTGgttttagagctagaaatagcaagttaaaataag
1230	NO03G01150	ccgggtccgattcccggtgcctgcaGCACCTCCAAAATTACACCCgttttagagctagaaatagcaagttaaaataag
1231	NO03G01160	ccgggtccgattcccggtgcctgcaTTATCAACATCAGCAAGACAgttttagagctagaaatagcaagttaaaataag
1232	NO03G01170	ccgggtccgattcccggtgcctgcaGTGCAGGATAAAGACAAAGGgttttagagctagaaatagcaagttaaaataag
1233	NO03G01180	ccgggtccgattcccggtgcctgcaCGAATGGAACGGGAACATCAgttttagagctagaaatagcaagttaaaataag
1234	NO03G01190	ccgggtccgattcccggtgcctgcaGTCCGAAACCAGAAGCAAGGgttttagagctagaaatagcaagttaaaataag
1235	NO03G01200	ccgggtccgattcccggtgcctgcaAATGTTTCAAACCCACCCAGgttttagagctagaaatagcaagttaaaataag
1236	NO03G01220	ccgggtccgattcccggtgcctgcaCAACGAAATAGATCGTCTTGgttttagagctagaaatagcaagttaaaataag
1237	NO03G01230	ccgggtccgattcccggtgcctgcaGATCCTGTTGGTGTACCTGGgttttagagctagaaatagcaagttaaaataag
1238	NO03G01240	ccgggtccgattcccggtgcctgcaACCTTGCCCGATATGCAGGGgttttagagctagaaatagcaagttaaaataag
1239	NO03G01250	ccgggtccgattcccggtgcctgcaCGGGTGAAGATGCTCCTACGgttttagagctagaaatagcaagttaaaataag
1240	NO03G01260	ccgggtccgattcccggtgcctgcaTCCTCGACACTACTTCCCTGgttttagagctagaaatagcaagttaaaataag
1241	NO03G01270	ccgggtccgattcccggtgcctgcaGCCTTCGGGAGTAGAGACGAgttttagagctagaaatagcaagttaaaataag
1242	NO03G01280	ccgggtccgattcccggtgcctgcaGTATTGGATGTCGGAGAATGgttttagagctagaaatagcaagttaaaataag
1243	NO03G01290	ccgggtccgattcccggtgcctgcaTTACCCGTAACCCCTCCCTGgttttagagctagaaatagcaagttaaaataag
1244	NO03G01300	ccgggtccgattcccggtgcctgcaGGATAAGAAGAATCTGACGGgttttagagctagaaatagcaagttaaaataag
1245	NO03G01310	ccgggtccgattcccggtgcctgcaACGCTGCGAGAATCTTTCAGgttttagagctagaaatagcaagttaaaataag
1246	NO03G01320	ccgggtccgattcccggtgcctgcaCTGGAGACATGAAAGCATGGgttttagagctagaaatagcaagttaaaataag
1247	NO03G01330	ccgggtccgattcccggtgcctgcaTTTTAAGAGATCGAACAGGTgttttagagctagaaatagcaagttaaaataag
1248	NO03G01340	ccgggtccgattcccggtgcctgcaGTAGTCCCATGTCGTCCCGGgttttagagctagaaatagcaagttaaaataag
1249	NO03G01350	ccgggtccgattcccggtgcctgcaTGGACCATTAAATCCCACGGgttttagagctagaaatagcaagttaaaataag
1250	NO03G01360	ccgggtccgattcccggtgcctgcaGGGATCGACATTGTCTTGTGgttttagagctagaaatagcaagttaaaataag
1251	NO03G01370	ccgggtccgattcccggtgcctgcaGTCGCAAAAGAAGAGAGGCGgttttagagctagaaatagcaagttaaaataag
1252	NO03G01380	ccgggtccgattcccggtgcctgcaGCATTGGATCGGCAAGAAAGgttttagagctagaaatagcaagttaaaataag
1253	NO03G01390	ccgggtccgattcccggtgcctgcaTGCGGTTTCATAGAACACGAgttttagagctagaaatagcaagttaaaataag
1254	NO03G01400	ccgggtccgattcccggtgcctgcaGTGACACCAATAAGTAGCAGgttttagagctagaaatagcaagttaaaataag
1255	NO03G01410	ccgggtccgattcccggtgcctgcaGCGTTGTTCGAGTATGCGGGgttttagagctagaaatagcaagttaaaataag
1256	NO03G01420	ccgggtccgattcccggtgcctgcaTCTAACACACCTACCGATGGgttttagagctagaaatagcaagttaaaataag
1257	NO03G01430	ccgggtccgattcccggtgcctgcaTCTGCTCCTCTCACCCACAAgttttagagctagaaatagcaagttaaaataag
1258	NO03G01440	ccgggtccgattcccggtgcctgcaGCCGGCCTCAGATTACTGGAgttttagagctagaaatagcaagttaaaataag
1259	NO03G01450	ccgggtccgattcccggtgcctgcaCAACTCCACCAAGAGCCGCAgttttagagctagaaatagcaagttaaaataag
1260	NO03G01460	ccgggtccgattcccggtgcctgcaCAATGGGACCTTGACCATCGgttttagagctagaaatagcaagttaaaataag
1261	NO03G01470	ccgggtccgattcccggtgcctgcaCTCGCCCTAGTAATTCATGGgttttagagctagaaatagcaagttaaaataag
1262	NO03G01480	ccgggtccgattcccggtgcctgcaTGTATCCTGATGGATGCGTGgttttagagctagaaatagcaagttaaaataag
1263	NO03G01490	ccgggtccgattcccggtgcctgcaCTACCACCAGAACATTTCTGgttttagagctagaaatagcaagttaaaataag
1264	NO03G01500	ccgggtccgattcccggtgcctgcaGGAGTTGCAAGTTCCCCATGgttttagagctagaaatagcaagttaaaataag
1265	NO03G01510	ccgggtccgattcccggtgcctgcaATGTGAATTACCTCTACCGAgttttagagctagaaatagcaagttaaaataag
1266	NO03G01520	ccgggtccgattcccggtgcctgcaCTGCGTCGCTCAAATCCAGGgttttagagctagaaatagcaagttaaaataag
1267	NO03G01530	ccgggtccgattcccggtgcctgcaCACGAACATTGTGTCCACCAgttttagagctagaaatagcaagttaaaataag
1268	NO03G01540	ccgggtccgattcccggtgcctgcaGCCCGCAAAATATGGTACGGgttttagagctagaaatagcaagttaaaataag
1269	NO03G01550	ccgggtccgattcccggtgcctgcaAACAACCAGCATATGCACGAgttttagagctagaaatagcaagttaaaataag
1270	NO03G01560	ccgggtccgattcccggtgcctgcaGGGATGGGTGAATAATGGAGgttttagagctagaaatagcaagttaaaataag
1271	NO03G01570	ccgggtccgattcccggtgcctgcaTGGCCCATGATAAAGTTGAGgttttagagctagaaatagcaagttaaaataag
1272	NO03G01580	ccgggtccgattcccggtgcctgcaGCAGATTGCTAACATCACTGgttttagagctagaaatagcaagttaaaataag
1273	NO03G01590	ccgggtccgattcccggtgcctgcaTGCTTCGCTTCATCACACCGgttttagagctagaaatagcaagttaaaataag
1274	NO03G01600	ccgggtccgattcccggtgcctgcaTAATGAGCGCGAATTCCGTGgttttagagctagaaatagcaagttaaaataag
1275	NO03G01610	ccgggtccgattcccggtgcctgcaGGACCGATGAGAGCACCTTGgttttagagctagaaatagcaagttaaaataag
1276	NO03G01620	ccgggtccgattcccggtgcctgcaTTAGGACACGCATACGACCGgttttagagctagaaatagcaagttaaaataag
1277	NO03G01630	ccgggtccgattcccggtgcctgcaATCGATAGAAGGATGCTGAGgttttagagctagaaatagcaagttaaaataag
1278	NO03G01640	ccgggtccgattcccggtgcctgcaATCGAACTTCAACAACCCGGgttttagagctagaaatagcaagttaaaataag
1279	NO03G01650	ccgggtccgattcccggtgcctgcaGCGTATAACAATGGCCCCAAgttttagagctagaaatagcaagttaaaataag
1280	NO03G01660	ccgggtccgattcccggtgcctgcaTCTTTGCGAACTACATGGCGgttttagagctagaaatagcaagttaaaataag
1281	NO03G01670	ccgggtccgattcccggtgcctgcaACTGGCTATTGACATATGAGgttttagagctagaaatagcaagttaaaataag
1282	NO03G01680	ccgggtccgattcccggtgcctgcaTGTATTCATACAGACCCCGGgttttagagctagaaatagcaagttaaaataag
1283	NO03G01690	ccgggtccgattcccggtgcctgcaGCCCTCTTCTAAAGACACAGgttttagagctagaaatagcaagttaaaataag
1284	NO03G01700	ccgggtccgattcccggtgcctgcaTTAGTGGAGAGGCGTCGATGgttttagagctagaaatagcaagttaaaataag
1285	NO03G01710	ccgggtccgattcccggtgcctgcaACCCCAAGCTGATTTCCATGgttttagagctagaaatagcaagttaaaataag
1286	NO03G01720	ccgggtccgattcccggtgcctgcaAGCCCTTCAAGACGACCCAGgttttagagctagaaatagcaagttaaaataag
1287	NO03G01730	ccgggtccgattcccggtgcctgcaACACTGGATCCAGCTAAAAGgttttagagctagaaatagcaagttaaaataag
1288	NO03G01740	ccgggtccgattcccggtgcctgcaCTTAGAGTGGACAACGCGGTgttttagagctagaaatagcaagttaaaataag
1289	NO03G01750	ccgggtccgattcccggtgcctgcaGAAGCTCTATCAACACCCGGgttttagagctagaaatagcaagttaaaataag
1290	NO03G01760	ccgggtccgattcccggtgcctgcaGTGCATGTCAAGCTGAACGAgttttagagctagaaatagcaagttaaaataag
1291	NO03G01770	ccgggtccgattcccggtgcctgcaTCAATCGACCCTTTGCAGGAgttttagagctagaaatagcaagttaaaataag
1292	NO03G01780	ccgggtccgattcccggtgcctgcaGAGGAGACATCATCACACAAgttttagagctagaaatagcaagttaaaataag
1293	NO03G01790	ccgggtccgattcccggtgcctgcaAATTGGCGCCTTCCATCGTAgttttagagctagaaatagcaagttaaaataag
1294	NO03G01800	ccgggtccgattcccggtgcctgcaGTGGGCGCAAGCATCTCTCAgttttagagctagaaatagcaagttaaaataag
1295	NO03G01810	ccgggtccgattcccggtgcctgcaAAATGCAGCAGCAACGACGAgttttagagctagaaatagcaagttaaaataag
1296	NO03G01820	ccgggtccgattcccggtgcctgcaGCAGAACTGACTCTTCCGAGgttttagagctagaaatagcaagttaaaataag
1297	NO03G01830	ccgggtccgattcccggtgcctgcaAGACTGTATCGAAGGCCGAGgttttagagctagaaatagcaagttaaaataag
1298	NO03G01840	ccgggtccgattcccggtgcctgcaGCTGATCGCAGCGCACCCAGgttttagagctagaaatagcaagttaaaataag
1299	NO03G01850	ccgggtccgattcccggtgcctgcaGACGAGCAAAGGTTATGAGGgttttagagctagaaatagcaagttaaaataag
1300	NO03G01860	ccgggtccgattcccggtgcctgcaTGAGCAGCAGTGAAGTTGCGgttttagagctagaaatagcaagttaaaataag
1301	NO03G01870	ccgggtccgattcccggtgcctgcaCGATGCCCTGAAATACGAGGgttttagagctagaaatagcaagttaaaataag
1302	NO03G01880	ccgggtccgattcccggtgcctgcaACGACCGGTAGACATGTCGAgttttagagctagaaatagcaagttaaaataag
1303	NO03G01890	ccgggtccgattcccggtgcctgcaGACCATCTTGCTAAACAACGgttttagagctagaaatagcaagttaaaataag
1304	NO03G01900	ccgggtccgattcccggtgcctgcaGCTCCAAAAGCTCTTCACGTgttttagagctagaaatagcaagttaaaataag
1305	NO03G01910	ccgggtccgattcccggtgcctgcaTGTGCGGGTCCAGTTCGTAGgttttagagctagaaatagcaagttaaaataag
1306	NO03G01920	ccgggtccgattcccggtgcctgcaATTACAACAAGACCTTTACGgttttagagctagaaatagcaagttaaaataag
1307	NO03G01930	ccgggtccgattcccggtgcctgcaGTTATGGACGATAACTTCTGgttttagagctagaaatagcaagttaaaataag
1308	NO03G01940	ccgggtccgattcccggtgcctgcaGAAAGACCCCTACATCCTGGgttttagagctagaaatagcaagttaaaataag
1309	NO03G01950	ccgggtccgattcccggtgcctgcaCAATTACGACCTCATCAAGGgttttagagctagaaatagcaagttaaaataag
1310	NO03G01960	ccgggtccgattcccggtgcctgcaAGATACGCTTTACACCGCCTgttttagagctagaaatagcaagttaaaataag
1311	NO03G01970	ccgggtccgattcccggtgcctgcaACCAGATGAACCCATGACAAgttttagagctagaaatagcaagttaaaataag
1312	NO03G01980	ccgggtccgattcccggtgcctgcaCAAGGCGTATTACCACATCAgttttagagctagaaatagcaagttaaaataag
1313	NO03G01990	ccgggtccgattcccggtgcctgcaGGCCGTGGTAGTCCTCAACGgttttagagctagaaatagcaagttaaaataag
1314	NO03G02000	ccgggtccgattcccggtgcctgcaGGCAAGGTACACGGGAGCACgttttagagctagaaatagcaagttaaaataag
1315	NO03G02010	ccgggtccgattcccggtgcctgcaACGACGCGAGGTGAAGAAGTgttttagagctagaaatagcaagttaaaataag
1316	NO03G02020	ccgggtccgattcccggtgcctgcaGCAGCAATGGTAGCAAAACGgttttagagctagaaatagcaagttaaaataag
1317	NO03G02030	ccgggtccgattcccggtgcctgcaTACCGATACTGACGACGACGgttttagagctagaaatagcaagttaaaataag
1318	NO03G02040	ccgggtccgattcccggtgcctgcaGGTTCGACGATGACGATGTGgttttagagctagaaatagcaagttaaaataag
1319	NO03G02050	ccgggtccgattcccggtgcctgcaAACCCGAGCAAAAACAATGGgttttagagctagaaatagcaagttaaaataag
1320	NO03G02060	ccgggtccgattcccggtgcctgcaGATTTCTGTGAAGAATCCGGgttttagagctagaaatagcaagttaaaataag
1321	NO03G02070	ccgggtccgattcccggtgcctgcaGCTCCCATAGCTCAAGCGTGgttttagagctagaaatagcaagttaaaataag
1322	NO03G02080	ccgggtccgattcccggtgcctgcaTTGCGGCACATAACGCTGCAgttttagagctagaaatagcaagttaaaataag
1323	NO03G02090	ccgggtccgattcccggtgcctgcaTGAGGGATTTGAATAAAACGgttttagagctagaaatagcaagttaaaataag
1324	NO03G02100	ccgggtccgattcccggtgcctgcaCAGCGCAGCTAAGAAGCCGGgttttagagctagaaatagcaagttaaaataag
1325	NO03G02120	ccgggtccgattcccggtgcctgcaACTACATGGTCAGAGGCCGGgttttagagctagaaatagcaagttaaaataag
1326	NO03G02110	ccgggtccgattcccggtgcctgcaTGAAAATTGATATGGCAGCGgttttagagctagaaatagcaagttaaaataag
1327	NO03G02130	ccgggtccgattcccggtgcctgcaGAAATGGGGAACTACCTAGGgttttagagctagaaatagcaagttaaaataag
1328	NO03G02140	ccgggtccgattcccggtgcctgcaGATTCCAAGGATCCGAACCAgttttagagctagaaatagcaagttaaaataag
1329	NO03G02150	ccgggtccgattcccggtgcctgcaGTCCGAGCCGAAGGTCAAGGgttttagagctagaaatagcaagttaaaataag
1330	NO03G02160	ccgggtccgattcccggtgcctgcaTGCAACGAATTAGGAGACGAgttttagagctagaaatagcaagttaaaataag
1331	NO03G02170	ccgggtccgattcccggtgcctgcaGACAACACATGCTAACCCGGgttttagagctagaaatagcaagttaaaataag
1332	NO03G02180	ccgggtccgattcccggtgcctgcaCTTTCAAATACAAGGCACCGgttttagagctagaaatagcaagttaaaataag
1333	NO03G02190	ccgggtccgattcccggtgcctgcaGAATCTTCTTCGCACCTCGAgttttagagctagaaatagcaagttaaaataag
1334	NO03G02200	ccgggtccgattcccggtgcctgcaACTAAGACGACCACCACACGgttttagagctagaaatagcaagttaaaataag
1335	NO03G02210	ccgggtccgattcccggtgcctgcaACTTCAGCAGAAACAGGTAGgttttagagctagaaatagcaagttaaaataag
1336	NO03G02220	ccgggtccgattcccggtgcctgcaGCCTTGACGAGCTTTGGTGAgttttagagctagaaatagcaagttaaaataag
1337	NO03G02230	ccgggtccgattcccggtgcctgcaTCGAATAGACGACAACAACGgttttagagctagaaatagcaagttaaaataag
1338	NO03G02240	ccgggtccgattcccggtgcctgcaTTCTGGCCTAAGGTTTACAGgttttagagctagaaatagcaagttaaaataag
1339	NO03G02250	ccgggtccgattcccggtgcctgcaCATTGACTGGAAATCGACAGgttttagagctagaaatagcaagttaaaataag
1340	NO03G02260	ccgggtccgattcccggtgcctgcaGCATCGCTGCTACTATGGAGgttttagagctagaaatagcaagttaaaataag
1341	NO03G02270	ccgggtccgattcccggtgcctgcaAGGCGGTAAAGGCCCCATCGgttttagagctagaaatagcaagttaaaataag
1342	NO03G02280	ccgggtccgattcccggtgcctgcaAGAGCTGCTGTTCCTTACGGgttttagagctagaaatagcaagttaaaataag
1343	NO03G02290	ccgggtccgattcccggtgcctgcaGATAGTCGGTGAAGGCCGCGgttttagagctagaaatagcaagttaaaataag
1344	NO03G02300	ccgggtccgattcccggtgcctgcaTTGAGTACTGGAATCAACGGgttttagagctagaaatagcaagttaaaataag
1345	NO03G02310	ccgggtccgattcccggtgcctgcaCGGGCTCCAGATCCCCACGTgttttagagctagaaatagcaagttaaaataag
1346	NO03G02320	ccgggtccgattcccggtgcctgcaTCTACATGATGATCCGACAAgttttagagctagaaatagcaagttaaaataag
1347	NO03G02330	ccgggtccgattcccggtgcctgcaAGTGACGAATCGCAGAACGAgttttagagctagaaatagcaagttaaaataag
1348	NO03G02340	ccgggtccgattcccggtgcctgcaCCTGGCAAGCACCACCACAGgttttagagctagaaatagcaagttaaaataag
1349	NO03G02350	ccgggtccgattcccggtgcctgcaCAGCAGTTAACGTACTACCCgttttagagctagaaatagcaagttaaaataag
1350	NO03G02360	ccgggtccgattcccggtgcctgcaGGCAACCTTAATAACACCAAgttttagagctagaaatagcaagttaaaataag
1351	NO03G02370	ccgggtccgattcccggtgcctgcaCGGACCCCCCCTAAAGCACGgttttagagctagaaatagcaagttaaaataag
1352	NO03G02380	ccgggtccgattcccggtgcctgcaTAAGTTCAGTGGTCACTTCGgttttagagctagaaatagcaagttaaaataag
1353	NO03G02390	ccgggtccgattcccggtgcctgcaGAACACGGCGAAGTACATGGgttttagagctagaaatagcaagttaaaataag
1354	NO03G02400	ccgggtccgattcccggtgcctgcaGGAGGATAGTCAAGGCCCGTgttttagagctagaaatagcaagttaaaataag
1355	NO03G02410	ccgggtccgattcccggtgcctgcaACAAACTCCAGTCACCCGGGgttttagagctagaaatagcaagttaaaataag
1356	NO03G02420	ccgggtccgattcccggtgcctgcaGCTTGGGCGAGCTCTCGACGgttttagagctagaaatagcaagttaaaataag
1357	NO03G02430	ccgggtccgattcccggtgcctgcaTGTCACCAAGCACTGCGTAGgttttagagctagaaatagcaagttaaaataag
1358	NO03G02440	ccgggtccgattcccggtgcctgcaCTTGTGCTCAACACATGGAGgttttagagctagaaatagcaagttaaaataag
1359	NO03G02450	ccgggtccgattcccggtgcctgcaGCACCATGTCAATTATCAGGgttttagagctagaaatagcaagttaaaataag
1360	NO03G02460	ccgggtccgattcccggtgcctgcaCATGCTCATCCCCCAAACGGgttttagagctagaaatagcaagttaaaataag
1361	NO03G02470	ccgggtccgattcccggtgcctgcaTCGCCGTGGAAGAGAAAAGGgttttagagctagaaatagcaagttaaaataag
1362	NO03G02480	ccgggtccgattcccggtgcctgcaAAGACACAGAGGGAAATCCAgttttagagctagaaatagcaagttaaaataag
1363	NO03G02490	ccgggtccgattcccggtgcctgcaTCCGGTAAAAGACGTCCCGGgttttagagctagaaatagcaagttaaaataag
1364	NO03G02500	ccgggtccgattcccggtgcctgcaTCAAATCAGATAGATCGGAGgttttagagctagaaatagcaagttaaaataag
1365	NO03G02510	ccgggtccgattcccggtgcctgcaTCCAGATAGAACAAGGGCGAgttttagagctagaaatagcaagttaaaataag
1366	NO03G02520	ccgggtccgattcccggtgcctgcaTCTTGAATGCAGTCAACAGGgttttagagctagaaatagcaagttaaaataag
1367	NO03G02530	ccgggtccgattcccggtgcctgcaTGGCGCGTTTACTTCCAAGGgttttagagctagaaatagcaagttaaaataag
1368	NO03G02540	ccgggtccgattcccggtgcctgcaGCCCAAGGTAATGCGCCATGgttttagagctagaaatagcaagttaaaataag
1369	NO03G02550	ccgggtccgattcccggtgcctgcaGAGCTGTTAGACCTTGAATGgttttagagctagaaatagcaagttaaaataag
1370	NO03G02560	ccgggtccgattcccggtgcctgcaTCTTTCCAGATTCAGCACGGgttttagagctagaaatagcaagttaaaataag
1371	NO03G02570	ccgggtccgattcccggtgcctgcaACGTGGACATGGAGTGTGTGgttttagagctagaaatagcaagttaaaataag
1372	NO03G02580	ccgggtccgattcccggtgcctgcaGGCGTACCATGAGAACATTGgttttagagctagaaatagcaagttaaaataag
1373	NO03G02610	ccgggtccgattcccggtgcctgcaGCGTCGGGTACCTCCAAGAGgttttagagctagaaatagcaagttaaaataag
1374	NO03G02620	ccgggtccgattcccggtgcctgcaGGTAGACGTTGTCCACAATGgttttagagctagaaatagcaagttaaaataag
1375	NO03G02630	ccgggtccgattcccggtgcctgcaGCTGATCAAGGTGCAACAGGgttttagagctagaaatagcaagttaaaataag
1376	NO03G02640	ccgggtccgattcccggtgcctgcaGATCGCGGCAGGTATCTCGGgttttagagctagaaatagcaagttaaaataag
1377	NO03G02650	ccgggtccgattcccggtgcctgcaGGAGGAGAACCAGTATACCGgttttagagctagaaatagcaagttaaaataag
1378	NO03G02660	ccgggtccgattcccggtgcctgcaGAGCATCTTGTGAAGCACAGgttttagagctagaaatagcaagttaaaataag
1379	NO03G02670	ccgggtccgattcccggtgcctgcaGTGATGAGTAGATAATGGTGgttttagagctagaaatagcaagttaaaataag
1380	NO03G02680	ccgggtccgattcccggtgcctgcaAATCGCAGCTCAAGAACCCGgttttagagctagaaatagcaagttaaaataag
1381	NO03G02690	ccgggtccgattcccggtgcctgcaGGCGGAGTTGTATCCACCAAgttttagagctagaaatagcaagttaaaataag
1382	NO03G02700	ccgggtccgattcccggtgcctgcaGCCGCAATGTCTCATTACCGgttttagagctagaaatagcaagttaaaataag
1383	NO03G02710	ccgggtccgattcccggtgcctgcaGTTGGCCACTACCTCGACGTgttttagagctagaaatagcaagttaaaataag
1384	NO03G02720	ccgggtccgattcccggtgcctgcaGAAAGTCACCATCATTACCGgttttagagctagaaatagcaagttaaaataag
1385	NO03G02730	ccgggtccgattcccggtgcctgcaCCTCGTCAAAGGTGGGCATGgttttagagctagaaatagcaagttaaaataag
1386	NO03G02740	ccgggtccgattcccggtgcctgcaGAAGGCTGCGGGTGCCAAGAgttttagagctagaaatagcaagttaaaataag
1387	NO03G02750	ccgggtccgattcccggtgcctgcaAAGACTTTGACATGTATCCAgttttagagctagaaatagcaagttaaaataag
1388	NO03G02760	ccgggtccgattcccggtgcctgcaGTGACGAAGGAGACATGACGgttttagagctagaaatagcaagttaaaataag
1389	NO03G02770	ccgggtccgattcccggtgcctgcaTCCCAGCATAGATGACAAGGgttttagagctagaaatagcaagttaaaataag
1390	NO03G02780	ccgggtccgattcccggtgcctgcaAGTCACTCTTATATCGACGGgttttagagctagaaatagcaagttaaaataag
1391	NO03G02790	ccgggtccgattcccggtgcctgcaGGATAATACGTTGAGCTGCGgttttagagctagaaatagcaagttaaaataag
1392	NO03G02800	ccgggtccgattcccggtgcctgcaTTGCGATCCCAGTACACCAAgttttagagctagaaatagcaagttaaaataag
1393	NO03G02810	ccgggtccgattcccggtgcctgcaAAACGAGCAAATCGGTCATGgttttagagctagaaatagcaagttaaaataag
1394	NO03G02820	ccgggtccgattcccggtgcctgcaGTTGCCTCATCATGACAAAGgttttagagctagaaatagcaagttaaaataag
1395	NO03G02830	ccgggtccgattcccggtgcctgcaTCTGCGACAATATCCATACGgttttagagctagaaatagcaagttaaaataag
1396	NO03G02840	ccgggtccgattcccggtgcctgcaATGCCAGTATGCCTCCAGGGgttttagagctagaaatagcaagttaaaataag
1397	NO03G02850	ccgggtccgattcccggtgcctgcaTCCCGGCATTGTCTAGTCCAgttttagagctagaaatagcaagttaaaataag
1398	NO03G02860	ccgggtccgattcccggtgcctgcaCCGGCAGCTACTAAGCCCCGgttttagagctagaaatagcaagttaaaataag
1399	NO03G02870	ccgggtccgattcccggtgcctgcaTAGGACGAAGAGCTGAACCAgttttagagctagaaatagcaagttaaaataag
1400	NO03G02880	ccgggtccgattcccggtgcctgcaAGCGCTAATCTACAACCTGGgttttagagctagaaatagcaagttaaaataag
1401	NO03G02890	ccgggtccgattcccggtgcctgcaGTACTTTCCGAATGTCAGGAgttttagagctagaaatagcaagttaaaataag
1402	NO03G02900	ccgggtccgattcccggtgcctgcaAGGACCAAAGGCTCTTGCCAgttttagagctagaaatagcaagttaaaataag
1403	NO03G02910	ccgggtccgattcccggtgcctgcaGCTTAAGGATGTGATTTACGgttttagagctagaaatagcaagttaaaataag
1404	NO03G02920	ccgggtccgattcccggtgcctgcaGCCATCAAGAAGTACAACGTgttttagagctagaaatagcaagttaaaataag
1405	NO03G02930	ccgggtccgattcccggtgcctgcaGACCAGCATTTACCCCAACAgttttagagctagaaatagcaagttaaaataag
1406	NO03G02940	ccgggtccgattcccggtgcctgcaTGGCGATAACAATCCCAAGGgttttagagctagaaatagcaagttaaaataag
1407	NO03G02950	ccgggtccgattcccggtgcctgcaGAGAGGCTTGGAAACTGTCTgttttagagctagaaatagcaagttaaaataag
1408	NO03G02960	ccgggtccgattcccggtgcctgcaTAGATGAAGAGAGGTCTCGAgttttagagctagaaatagcaagttaaaataag
1409	NO03G02970	ccgggtccgattcccggtgcctgcaATGCCTTGTAGTAATGACAGgttttagagctagaaatagcaagttaaaataag
1410	NO03G02980	ccgggtccgattcccggtgcctgcaTGTGACATTTGAAGACATCGgttttagagctagaaatagcaagttaaaataag
1411	NO03G02990	ccgggtccgattcccggtgcctgcaAAAGCGAGAATTGACAGACGgttttagagctagaaatagcaagttaaaataag
1412	NO03G03000	ccgggtccgattcccggtgcctgcaGTCGGAGGGAATAGTTACGGgttttagagctagaaatagcaagttaaaataag
1413	NO03G03010	ccgggtccgattcccggtgcctgcaCCCCGACTCAGATCGTGCGGgttttagagctagaaatagcaagttaaaataag
1414	NO03G03020	ccgggtccgattcccggtgcctgcaAGTATCCGTCATATCCAGGAgttttagagctagaaatagcaagttaaaataag
1415	NO03G03030	ccgggtccgattcccggtgcctgcaCGAGACAGTGGTACATCCTGgttttagagctagaaatagcaagttaaaataag
1416	NO03G03040	ccgggtccgattcccggtgcctgcaCGTTCTCGAGAGCTTGACTGgttttagagctagaaatagcaagttaaaataag
1417	NO03G03050	ccgggtccgattcccggtgcctgcaCGGACTACAGTCGTTGACGGgttttagagctagaaatagcaagttaaaataag
1418	NO03G03060	ccgggtccgattcccggtgcctgcaAGTACGCGTTCACGGGCACAgttttagagctagaaatagcaagttaaaataag
1419	NO03G03070	ccgggtccgattcccggtgcctgcaGTCGTTCACGTTCTTGACCGgttttagagctagaaatagcaagttaaaataag
1420	NO03G03080	ccgggtccgattcccggtgcctgcaGCATCATCACCATCAACGTGgttttagagctagaaatagcaagttaaaataag
1421	NO03G03090	ccgggtccgattcccggtgcctgcaGCAGCGGCTGATTGATGGCGgttttagagctagaaatagcaagttaaaataag
1422	NO03G03100	ccgggtccgattcccggtgcctgcaGGGCATTCTCAGTTAGCATGgttttagagctagaaatagcaagttaaaataag
1423	NO03G03110	ccgggtccgattcccggtgcctgcaGCTGACGCCCATGATGACCGgttttagagctagaaatagcaagttaaaataag
1424	NO03G03120	ccgggtccgattcccggtgcctgcaGGGGTCTTTAGCGAAATGAGgttttagagctagaaatagcaagttaaaataag
1425	NO03G03130	ccgggtccgattcccggtgcctgcaTTTGGCACTCAAAAGCCGGGgttttagagctagaaatagcaagttaaaataag
1426	NO03G03140	ccgggtccgattcccggtgcctgcaCCAAGGCACTGAGTACAATGgttttagagctagaaatagcaagttaaaataag
1427	NO03G03150	ccgggtccgattcccggtgcctgcaGATCACCCATCCCACCGTGAgttttagagctagaaatagcaagttaaaataag
1428	NO03G03160	ccgggtccgattcccggtgcctgcaTGGCCAAGGGATGCTGACGGgttttagagctagaaatagcaagttaaaataag
1429	NO03G03170	ccgggtccgattcccggtgcctgcaCTGGGAAGCGAGCAACATGGgttttagagctagaaatagcaagttaaaataag
1430	NO03G03180	ccgggtccgattcccggtgcctgcaACGTTAAAGCAGCGGCACAAgttttagagctagaaatagcaagttaaaataag
1431	NO03G03190	ccgggtccgattcccggtgcctgcaTTGCCGTGAGGAGCAGCGGGgttttagagctagaaatagcaagttaaaataag
1432	NO03G03200	ccgggtccgattcccggtgcctgcaTGGGGTCGTCCAGAAGACACgttttagagctagaaatagcaagttaaaataag
1433	NO03G03210	ccgggtccgattcccggtgcctgcaCATTCGATCGCTCACCACAGgttttagagctagaaatagcaagttaaaataag
1434	NO03G03220	ccgggtccgattcccggtgcctgcaGTCCGAGTTAGGAAGCATGGgttttagagctagaaatagcaagttaaaataag
1435	NO03G03230	ccgggtccgattcccggtgcctgcaTTCATTGCACCATCACCAGGgttttagagctagaaatagcaagttaaaataag
1436	NO03G03240	ccgggtccgattcccggtgcctgcaGGGCATATCGGTTTGCTGTGgttttagagctagaaatagcaagttaaaataag
1437	NO03G03250	ccgggtccgattcccggtgcctgcaGCATAATTTTCTGACATACGgttttagagctagaaatagcaagttaaaataag
1438	NO03G03260	ccgggtccgattcccggtgcctgcaATAGAACCAGATATGCACCGgttttagagctagaaatagcaagttaaaataag
1439	NO03G03270	ccgggtccgattcccggtgcctgcaCAACATTGTGTAACCACCTGgttttagagctagaaatagcaagttaaaataag
1440	NO03G03280	ccgggtccgattcccggtgcctgcaACGTGGTAGGATGTCCTGGGgttttagagctagaaatagcaagttaaaataag
1441	NO03G03290	ccgggtccgattcccggtgcctgcaGCGGGCAAGTACGTCAACAGgttttagagctagaaatagcaagttaaaataag
1442	NO03G03300	ccgggtccgattcccggtgcctgcaGGAGCGGTTAGCAAGCACGGgttttagagctagaaatagcaagttaaaataag
1443	NO03G03310	ccgggtccgattcccggtgcctgcaACTCACTCTCGTTTAAACAGgttttagagctagaaatagcaagttaaaataag
1444	NO03G03320	ccgggtccgattcccggtgcctgcaCTACACCTATGGCTCTACGCgttttagagctagaaatagcaagttaaaataag
1445	NO03G03330	ccgggtccgattcccggtgcctgcaCGTAATAGTAGAGCACACAAgttttagagctagaaatagcaagttaaaataag
1446	NO03G03380	ccgggtccgattcccggtgcctgcaCAAGATGAAGAAACCTACCGgttttagagctagaaatagcaagttaaaataag
1447	NO03G03390	ccgggtccgattcccggtgcctgcaGTGATGGCTCGAGAATGCGGgttttagagctagaaatagcaagttaaaataag
1448	NO03G03400	ccgggtccgattcccggtgcctgcaGTTGCATGAGGAATGCACGTgttttagagctagaaatagcaagttaaaataag
1449	NO03G03410	ccgggtccgattcccggtgcctgcaACGGAGCGTAGAATTCGACGgttttagagctagaaatagcaagttaaaataag
1450	NO03G03420	ccgggtccgattcccggtgcctgcaCTATGATTGTGGTGAGAAGGgttttagagctagaaatagcaagttaaaataag
1451	NO03G03430	ccgggtccgattcccggtgcctgcaGGTCCACCAACGTTGCCTGCgttttagagctagaaatagcaagttaaaataag
1452	NO03G03440	ccgggtccgattcccggtgcctgcaGGGGCGGATCTACAGCTCGGgttttagagctagaaatagcaagttaaaataag
1453	NO03G03460	ccgggtccgattcccggtgcctgcaCAATCTGAATGAGAGCATCGgttttagagctagaaatagcaagttaaaataag
1454	NO03G03450	ccgggtccgattcccggtgcctgcaTACCTCAAGAAATCGTACCGgttttagagctagaaatagcaagttaaaataag
1455	NO03G03470	ccgggtccgattcccggtgcctgcaATGGATAGAGCACATCCAGGgttttagagctagaaatagcaagttaaaataag
1456	NO03G03480	ccgggtccgattcccggtgcctgcaCAATATCAGACAAGCCAAGGgttttagagctagaaatagcaagttaaaataag
1457	NO03G03490	ccgggtccgattcccggtgcctgcaGTATAGGTAATAAAACCACGgttttagagctagaaatagcaagttaaaataag
1458	NO03G03500	ccgggtccgattcccggtgcctgcaGCACAGTCATTACCGGGGAAgttttagagctagaaatagcaagttaaaataag
1459	NO03G03510	ccgggtccgattcccggtgcctgcaTGAGGATTTTCCGTACAATGgttttagagctagaaatagcaagttaaaataag
1460	NO03G03520	ccgggtccgattcccggtgcctgcaAGGGATGCAAAAAAAGTACGgttttagagctagaaatagcaagttaaaataag
1461	NO03G03530	ccgggtccgattcccggtgcctgcaCTTCCACAACGCTTGCACCGgttttagagctagaaatagcaagttaaaataag
1462	NO03G03540	ccgggtccgattcccggtgcctgcaATGATGCTCCAGGACAACTGgttttagagctagaaatagcaagttaaaataag
1463	NO03G03550	ccgggtccgattcccggtgcctgcaCCAGTACCCAAAACCTACGAgttttagagctagaaatagcaagttaaaataag
1464	NO03G03560	ccgggtccgattcccggtgcctgcaGGTTCTGGAAGGAGAAACAGgttttagagctagaaatagcaagttaaaataag
1465	NO03G03570	ccgggtccgattcccggtgcctgcaGTACACTTGAATATCCGCCAgttttagagctagaaatagcaagttaaaataag
1466	NO03G03580	ccgggtccgattcccggtgcctgcaAGTACGACCATCTAGAAGGGgttttagagctagaaatagcaagttaaaataag
1467	NO03G03590	ccgggtccgattcccggtgcctgcaTGGAGGTGGCATTCTCACTGgttttagagctagaaatagcaagttaaaataag
1468	NO03G03600	ccgggtccgattcccggtgcctgcaAAGCGCACAAGTAATACGAGgttttagagctagaaatagcaagttaaaataag
1469	NO03G03610	ccgggtccgattcccggtgcctgcaCAAGTACCAGCAAAGCACCGgttttagagctagaaatagcaagttaaaataag
1470	NO03G03620	ccgggtccgattcccggtgcctgcaACAATGGTCGAATCCCCCAGgttttagagctagaaatagcaagttaaaataag
1471	NO03G03630	ccgggtccgattcccggtgcctgcaATGGTCGATAGAGAATTTGGgttttagagctagaaatagcaagttaaaataag
1472	NO03G03640	ccgggtccgattcccggtgcctgcaGGACGTGAGCAAACATACGGgttttagagctagaaatagcaagttaaaataag
1473	NO03G03660	ccgggtccgattcccggtgcctgcaAAGGGGTCCCTTGCACAGTGgttttagagctagaaatagcaagttaaaataag
1474	NO03G03670	ccgggtccgattcccggtgcctgcaGAGGCGAATGACATGCCACGgttttagagctagaaatagcaagttaaaataag
1475	NO03G03680	ccgggtccgattcccggtgcctgcaCGGCGGTAGTGTGAACGAAGgttttagagctagaaatagcaagttaaaataag
1476	NO03G03690	ccgggtccgattcccggtgcctgcaAGAAACCAAGAGGGTCGAAGgttttagagctagaaatagcaagttaaaataag
1477	NO03G03700	ccgggtccgattcccggtgcctgcaATTCTTGCAGAGCACGACAGgttttagagctagaaatagcaagttaaaataag
1478	NO03G03710	ccgggtccgattcccggtgcctgcaACAACGACGTAAAATCATCGgttttagagctagaaatagcaagttaaaataag
1479	NO03G03720	ccgggtccgattcccggtgcctgcaATAACAGTGTGATCACCCTGgttttagagctagaaatagcaagttaaaataag
1480	NO03G03730	ccgggtccgattcccggtgcctgcaGAGTCGGGAAGCGTTGTGTGgttttagagctagaaatagcaagttaaaataag
1481	NO03G03740	ccgggtccgattcccggtgcctgcaGGGATAACAAGATTCCACGAgttttagagctagaaatagcaagttaaaataag
1482	NO03G03750	ccgggtccgattcccggtgcctgcaAATATCAACGAAAAGGTACGgttttagagctagaaatagcaagttaaaataag
1483	NO03G03760	ccgggtccgattcccggtgcctgcaCGCATCCACCCTAAGTCCCGgttttagagctagaaatagcaagttaaaataag
1484	NO03G03780	ccgggtccgattcccggtgcctgcaCATTATTCGAGACAACTGCTgttttagagctagaaatagcaagttaaaataag
1485	NO03G03790	ccgggtccgattcccggtgcctgcaTGGATTCACCAAGAAACCAAgttttagagctagaaatagcaagttaaaataag
1486	NO03G03800	ccgggtccgattcccggtgcctgcaTGTCAATGGTCCTTCCACTGgttttagagctagaaatagcaagttaaaataag
1487	NO03G03810	ccgggtccgattcccggtgcctgcaTGTACGCCAAAAAGGCATCGgttttagagctagaaatagcaagttaaaataag
1488	NO03G03820	ccgggtccgattcccggtgcctgcaACACGTAAACTTGTCCATCGgttttagagctagaaatagcaagttaaaataag
1489	NO03G03830	ccgggtccgattcccggtgcctgcaGCAATAAAGCGGATCCCAGAgttttagagctagaaatagcaagttaaaataag
1490	NO03G03840	ccgggtccgattcccggtgcctgcaATCCCTATGTGCGAAAACGAgttttagagctagaaatagcaagttaaaataag
1491	NO03G03850	ccgggtccgattcccggtgcctgcaCGTAATATTCGAAGGCTTGGgttttagagctagaaatagcaagttaaaataag
1492	NO03G03860	ccgggtccgattcccggtgcctgcaGCAGTTACATCGACATACGTgttttagagctagaaatagcaagttaaaataag
1493	NO03G03870	ccgggtccgattcccggtgcctgcaTCGCGGTAAATTGGTCTGGGgttttagagctagaaatagcaagttaaaataag
1494	NO03G03880	ccgggtccgattcccggtgcctgcaCTGTTGCATGCCTTCCTCCGgttttagagctagaaatagcaagttaaaataag
1495	NO03G03890	ccgggtccgattcccggtgcctgcaTTATGAGGATGGGAGCCGGGgttttagagctagaaatagcaagttaaaataag
1496	NO03G03900	ccgggtccgattcccggtgcctgcaGGGCTCTTTGAGTTGCGTGAgttttagagctagaaatagcaagttaaaataag
1497	NO03G03910	ccgggtccgattcccggtgcctgcaGTTGGTGCGATCAAACCACAgttttagagctagaaatagcaagttaaaataag
1498	NO03G03920	ccgggtccgattcccggtgcctgcaGAGTATGGGACACAAAGTGGgttttagagctagaaatagcaagttaaaataag
1499	NO03G03930	ccgggtccgattcccggtgcctgcaTCGTAACCTATGAAGATGAGgttttagagctagaaatagcaagttaaaataag
1500	NO03G03940	ccgggtccgattcccggtgcctgcaCGCAGCAAAACGACATACGGgttttagagctagaaatagcaagttaaaataag
1501	NO03G03950	ccgggtccgattcccggtgcctgcaTGCGTACATGCATGACACCGgttttagagctagaaatagcaagttaaaataag
1502	NO03G03960	ccgggtccgattcccggtgcctgcaACTATTGAAGGAAACCATGGgttttagagctagaaatagcaagttaaaataag
1503	NO03G03970	ccgggtccgattcccggtgcctgcaGAGCTTTAGGTCTGATGACGgttttagagctagaaatagcaagttaaaataag
1504	NO03G03980	ccgggtccgattcccggtgcctgcaCGACCATATGAAGGCGCCAGgttttagagctagaaatagcaagttaaaataag
1505	NO03G03990	ccgggtccgattcccggtgcctgcaTGGTCCACAAGGTGATACCGgttttagagctagaaatagcaagttaaaataag
1506	NO03G04000	ccgggtccgattcccggtgcctgcaGACATCGTGTACAAAAACCCgttttagagctagaaatagcaagttaaaataag
1507	NO03G04010	ccgggtccgattcccggtgcctgcaACCAAGAATATGGAGGCCCGgttttagagctagaaatagcaagttaaaataag
1508	NO03G04020	ccgggtccgattcccggtgcctgcaGCTCGTACGAGGCCAACACGgttttagagctagaaatagcaagttaaaataag
1509	NO03G04030	ccgggtccgattcccggtgcctgcaTGGGCTGCATGACTGACCAGgttttagagctagaaatagcaagttaaaataag
1510	NO03G04050	ccgggtccgattcccggtgcctgcaGCACCAACCATGGTCCACAGgttttagagctagaaatagcaagttaaaataag
1511	NO03G04060	ccgggtccgattcccggtgcctgcaACATATGGCGTGAAGCGTGGgttttagagctagaaatagcaagttaaaataag
1512	NO03G04070	ccgggtccgattcccggtgcctgcaGTTGGCCCAGACACATGGGGgttttagagctagaaatagcaagttaaaataag
1513	NO03G04080	ccgggtccgattcccggtgcctgcaAAGTGCAACAGCCACCGCGAgttttagagctagaaatagcaagttaaaataag
1514	NO03G04090	ccgggtccgattcccggtgcctgcaTAGTCACTTAGCTCGTGCTGgttttagagctagaaatagcaagttaaaataag
1515	NO03G04100	ccgggtccgattcccggtgcctgcaTCCATCCCATCGTCATAACGgttttagagctagaaatagcaagttaaaataag
1516	NO03G04110	ccgggtccgattcccggtgcctgcaGGCTTCCACCATCTACACCAgttttagagctagaaatagcaagttaaaataag
1517	NO03G04120	ccgggtccgattcccggtgcctgcaATCGACCGTATGCGGCACTGgttttagagctagaaatagcaagttaaaataag
1518	NO03G04130	ccgggtccgattcccggtgcctgcaTCCCGAGAATTCCTCTACGAgttttagagctagaaatagcaagttaaaataag
1519	NO03G04140	ccgggtccgattcccggtgcctgcaTCGTGGCAAAAACTGCCCGGgttttagagctagaaatagcaagttaaaataag
1520	NO03G04150	ccgggtccgattcccggtgcctgcaTACGCGCGGTACGAATGCAGgttttagagctagaaatagcaagttaaaataag
1521	NO03G04160	ccgggtccgattcccggtgcctgcaCGAGCAGGACGAAATCCACGgttttagagctagaaatagcaagttaaaataag
1522	NO03G04170	ccgggtccgattcccggtgcctgcaGACGAGTGCGATTAGCGACGgttttagagctagaaatagcaagttaaaataag
1523	NO03G04180	ccgggtccgattcccggtgcctgcaCTATAGAGAGGATGTCCAGGgttttagagctagaaatagcaagttaaaataag
1524	NO03G04190	ccgggtccgattcccggtgcctgcaAAAGTGATCCATGCCCCCGGgttttagagctagaaatagcaagttaaaataag
1525	NO03G04200	ccgggtccgattcccggtgcctgcaACGTGCGAGAAATCTACTTGgttttagagctagaaatagcaagttaaaataag
1526	NO03G04210	ccgggtccgattcccggtgcctgcaAAGACCCCTCCGTTATCCAGgttttagagctagaaatagcaagttaaaataag
1527	NO03G04220	ccgggtccgattcccggtgcctgcaTTAAGCGGAATGTCACGCGGgttttagagctagaaatagcaagttaaaataag
1528	NO03G04230	ccgggtccgattcccggtgcctgcaGATTGGCTGTGTGGAAAGTGgttttagagctagaaatagcaagttaaaataag
1529	NO03G04240	ccgggtccgattcccggtgcctgcaCCAAAGAATATCCAACGCCGgttttagagctagaaatagcaagttaaaataag
1530	NO03G04250	ccgggtccgattcccggtgcctgcaGAGAGCACCAGCGAGTGTGGgttttagagctagaaatagcaagttaaaataag
1531	NO03G04260	ccgggtccgattcccggtgcctgcaGAATCCGCAAACGCCCCTAGgttttagagctagaaatagcaagttaaaataag
1532	NO03G04270	ccgggtccgattcccggtgcctgcaCTTCACAGGAATAAGCGAAGgttttagagctagaaatagcaagttaaaataag
1533	NO03G04280	ccgggtccgattcccggtgcctgcaTCAGTCGATTATCATCAGTGgttttagagctagaaatagcaagttaaaataag
1534	NO03G04290	ccgggtccgattcccggtgcctgcaAGCGACTTGCACCAGATACGgttttagagctagaaatagcaagttaaaataag
1535	NO03G04300	ccgggtccgattcccggtgcctgcaTGTGGCTTATGCGACAGGCGgttttagagctagaaatagcaagttaaaataag
1536	NO03G04310	ccgggtccgattcccggtgcctgcaTGTAGCGTTGATGCGCCAAGgttttagagctagaaatagcaagttaaaataag
1537	NO03G04320	ccgggtccgattcccggtgcctgcaCAAACCTACCATCACAACAGgttttagagctagaaatagcaagttaaaataag
1538	NO03G04330	ccgggtccgattcccggtgcctgcaAAAGGCTTGAGGCAGTGACAgttttagagctagaaatagcaagttaaaataag
1539	NO03G04340	ccgggtccgattcccggtgcctgcaTGAATACAAGGGGAAGCTTGgttttagagctagaaatagcaagttaaaataag
1540	NO03G04350	ccgggtccgattcccggtgcctgcaGTACCCACAATCAAGCAACGgttttagagctagaaatagcaagttaaaataag
1541	NO03G04360	ccgggtccgattcccggtgcctgcaATAAGAAGAACAACCCCATGgttttagagctagaaatagcaagttaaaataag
1542	NO03G04370	ccgggtccgattcccggtgcctgcaGCCCAAGAAAACTAAGCACGgttttagagctagaaatagcaagttaaaataag
1543	NO03G04380	ccgggtccgattcccggtgcctgcaAGGAAGTAGCATGAAAATGGgttttagagctagaaatagcaagttaaaataag
1544	NO03G04390	ccgggtccgattcccggtgcctgcaCATCATGGAGAAACATTCGGgttttagagctagaaatagcaagttaaaataag
1545	NO03G04400	ccgggtccgattcccggtgcctgcaATTCGACCAGTAGGTGTGTGgttttagagctagaaatagcaagttaaaataag
1546	NO03G04410	ccgggtccgattcccggtgcctgcaCAATAGCGGCAGTGTTGTGAgttttagagctagaaatagcaagttaaaataag
1547	NO03G04420	ccgggtccgattcccggtgcctgcaGGAGATTAGAGATGGTCGCGgttttagagctagaaatagcaagttaaaataag
1548	NO03G04430	ccgggtccgattcccggtgcctgcaATGCAGCATTGTCTTCCCGGgttttagagctagaaatagcaagttaaaataag
1549	NO03G04440	ccgggtccgattcccggtgcctgcaTGTAGTGAGATGAAATGCCAgttttagagctagaaatagcaagttaaaataag
1550	NO03G04450	ccgggtccgattcccggtgcctgcaCAGCATCGAGAACTACGCGGgttttagagctagaaatagcaagttaaaataag
1551	NO03G04460	ccgggtccgattcccggtgcctgcaTTTGTGGGCAGTGTGCAGTGgttttagagctagaaatagcaagttaaaataag
1552	NO03G04470	ccgggtccgattcccggtgcctgcaTGTTGAGAAACTGACAGACAgttttagagctagaaatagcaagttaaaataag
1553	NO03G04480	ccgggtccgattcccggtgcctgcaAAGTGGGCGAGCAAACGCTGgttttagagctagaaatagcaagttaaaataag
1554	NO03G04490	ccgggtccgattcccggtgcctgcaCTGGGACAAGAACAAATGCGgttttagagctagaaatagcaagttaaaataag
1555	NO03G04500	ccgggtccgattcccggtgcctgcaCGACGTCCATGAAGCCAGCGgttttagagctagaaatagcaagttaaaataag
1556	NO03G04510	ccgggtccgattcccggtgcctgcaTAGGCTCAAACAGCACAGCAgttttagagctagaaatagcaagttaaaataag
1557	NO03G04520	ccgggtccgattcccggtgcctgcaATAAGCTGGAGAGTTCACAGgttttagagctagaaatagcaagttaaaataag
1558	NO03G04530	ccgggtccgattcccggtgcctgcaGAGGGTCGTCTTCGTCTCTGgttttagagctagaaatagcaagttaaaataag
1559	NO03G04540	ccgggtccgattcccggtgcctgcaGTACGACATGGTCTCAAAGGgttttagagctagaaatagcaagttaaaataag
1560	NO03G04550	ccgggtccgattcccggtgcctgcaGTTGATGAAGTCGAAACGCAgttttagagctagaaatagcaagttaaaataag
1561	NO03G04560	ccgggtccgattcccggtgcctgcaGTTCTTTCCGGCCATTGATGgttttagagctagaaatagcaagttaaaataag
1562	NO03G04570	ccgggtccgattcccggtgcctgcaTATTGCATCTACATCCCCAGgttttagagctagaaatagcaagttaaaataag
1563	NO03G04580	ccgggtccgattcccggtgcctgcaGGGTTTGAGAAACAGAACGGgttttagagctagaaatagcaagttaaaataag
1564	NO03G04590	ccgggtccgattcccggtgcctgcaTTGTCCTCCATGTTCCCACGgttttagagctagaaatagcaagttaaaataag
1565	NO03G04610	ccgggtccgattcccggtgcctgcaGAGCGAATCAAGATTAAGCAgttttagagctagaaatagcaagttaaaataag
1566	NO03G04620	ccgggtccgattcccggtgcctgcaAAATGGCATGTAATTTGCTGgttttagagctagaaatagcaagttaaaataag
1567	NO03G04630	ccgggtccgattcccggtgcctgcaTCAAGATCATCCCTCCCCAGgttttagagctagaaatagcaagttaaaataag
1568	NO03G04640	ccgggtccgattcccggtgcctgcaCAGCCTCAATTACCAGAACGgttttagagctagaaatagcaagttaaaataag
1569	NO03G04650	ccgggtccgattcccggtgcctgcaGCGGTTCTCAGTACAGGCCAgttttagagctagaaatagcaagttaaaataag
1570	NO03G04660	ccgggtccgattcccggtgcctgcaCTCCACAAAGTCGATCCAGGgttttagagctagaaatagcaagttaaaataag
1571	NO03G04670	ccgggtccgattcccggtgcctgcaTAGGTTTAGAGCACTATGTGgttttagagctagaaatagcaagttaaaataag
1572	NO03G04680	ccgggtccgattcccggtgcctgcaATGTGTGTAGGAAATCAGCGgttttagagctagaaatagcaagttaaaataag
1573	NO03G04690	ccgggtccgattcccggtgcctgcaTGGCTCCATCCATTCCACCGgttttagagctagaaatagcaagttaaaataag
1574	NO03G04700	ccgggtccgattcccggtgcctgcaTACAACCCAGTACCGCCAAGgttttagagctagaaatagcaagttaaaataag
1575	NO03G04710	ccgggtccgattcccggtgcctgcaGGTACCATCGTAGACATGCGgttttagagctagaaatagcaagttaaaataag
1576	NO03G04720	ccgggtccgattcccggtgcctgcaGAAGAAGACTTGCACAGTGAgttttagagctagaaatagcaagttaaaataag
1577	NO03G04730	ccgggtccgattcccggtgcctgcaATGTCTTTGGAAATGAGGCAgttttagagctagaaatagcaagttaaaataag
1578	NO03G04740	ccgggtccgattcccggtgcctgcaGCAATTCCCGATATGGATGGgttttagagctagaaatagcaagttaaaataag
1579	NO03G04750	ccgggtccgattcccggtgcctgcaACTTCCTGGTCCTCCCACGAgttttagagctagaaatagcaagttaaaataag
1580	NO03G04760	ccgggtccgattcccggtgcctgcaACCCGAGGTCACACTCAAGGgttttagagctagaaatagcaagttaaaataag
1581	NO03G04770	ccgggtccgattcccggtgcctgcaTCTCCCTCAAACCCTCGTTGgttttagagctagaaatagcaagttaaaataag
1582	NO03G04780	ccgggtccgattcccggtgcctgcaTGTCAATTTTCGGCACACGAgttttagagctagaaatagcaagttaaaataag
1583	NO03G04790	ccgggtccgattcccggtgcctgcaCGCAAATTCGACCAGCCCCGgttttagagctagaaatagcaagttaaaataag
1584	NO03G04800	ccgggtccgattcccggtgcctgcaGTCCTCATACGTAACAACCAgttttagagctagaaatagcaagttaaaataag
1585	NO03G04810	ccgggtccgattcccggtgcctgcaAGGCCAAACTCAAACCACAAgttttagagctagaaatagcaagttaaaataag
1586	NO03G04820	ccgggtccgattcccggtgcctgcaGTTTCCATCACCACCACCGGgttttagagctagaaatagcaagttaaaataag
1587	NO03G04830	ccgggtccgattcccggtgcctgcaTCTTTCTTCTCGATAACCCGgttttagagctagaaatagcaagttaaaataag
1588	NO03G04840	ccgggtccgattcccggtgcctgcaGCTTCCAGTACAAGGCATCGgttttagagctagaaatagcaagttaaaataag
1589	NO03G04850	ccgggtccgattcccggtgcctgcaATTTTATGGAAAGGTGACGAgttttagagctagaaatagcaagttaaaataag
1590	NO03G04860	ccgggtccgattcccggtgcctgcaTTGCCGCTGCTCCATCATCGgttttagagctagaaatagcaagttaaaataag
1591	NO03G04870	ccgggtccgattcccggtgcctgcaCTCATTAACGAGGAGCGATGgttttagagctagaaatagcaagttaaaataag
1592	NO03G04880	ccgggtccgattcccggtgcctgcaCAGATCCACTCCAAACAAAGgttttagagctagaaatagcaagttaaaataag
1593	NO03G04890	ccgggtccgattcccggtgcctgcaGACATCCATGAAGTACCATGgttttagagctagaaatagcaagttaaaataag
1594	NO03G04900	ccgggtccgattcccggtgcctgcaAATGATTATCATACGCAACGgttttagagctagaaatagcaagttaaaataag
1595	NO03G04910	ccgggtccgattcccggtgcctgcaACGACGCTTAGCTCTGGGCAgttttagagctagaaatagcaagttaaaataag
1596	NO03G04920	ccgggtccgattcccggtgcctgcaGGGCCCCATAGCTTAGAGGAgttttagagctagaaatagcaagttaaaataag
1597	NO03G04930	ccgggtccgattcccggtgcctgcaGATGGAGGCCCAGAGCTCAGgttttagagctagaaatagcaagttaaaataag
1598	NO03G04940	ccgggtccgattcccggtgcctgcaAGGGTGATTCCCGTACCAGGgttttagagctagaaatagcaagttaaaataag
1599	NO03G04950	ccgggtccgattcccggtgcctgcaTTCACATCAAGCCCACCCCGgttttagagctagaaatagcaagttaaaataag
1600	NO03G04960	ccgggtccgattcccggtgcctgcaTGGATGTTGGAGTAAGACCAgttttagagctagaaatagcaagttaaaataag
1601	NO03G04970	ccgggtccgattcccggtgcctgcaACTAAAGATGGGAATGACTGgttttagagctagaaatagcaagttaaaataag
1602	NO03G04980	ccgggtccgattcccggtgcctgcaGCCCCAATATCGATCTTGTGgttttagagctagaaatagcaagttaaaataag
1603	NO03G04990	ccgggtccgattcccggtgcctgcaCTTGCTGTGTGTGTTTAACGgttttagagctagaaatagcaagttaaaataag
1604	NO03G05000	ccgggtccgattcccggtgcctgcaTGCCAACAATGAGATCAACGgttttagagctagaaatagcaagttaaaataag
1605	NO03G05010	ccgggtccgattcccggtgcctgcaCACACGTTGGTAAGTCATCGgttttagagctagaaatagcaagttaaaataag
1606	NO03G05020	ccgggtccgattcccggtgcctgcaGCGTAGACGTAGGAGATGAGgttttagagctagaaatagcaagttaaaataag
1607	NO03G05030	ccgggtccgattcccggtgcctgcaGCAGGAACAGAAATTCGACGgttttagagctagaaatagcaagttaaaataag
1608	NO03G05040	ccgggtccgattcccggtgcctgcaATTCTGATCATTGTAGAGAAgttttagagctagaaatagcaagttaaaataag
1609	NO03G05050	ccgggtccgattcccggtgcctgcaCGTAGACCCGCAACTCGACGgttttagagctagaaatagcaagttaaaataag
1610	NO03G05060	ccgggtccgattcccggtgcctgcaCGATGTCAAGAAACTCCCGTgttttagagctagaaatagcaagttaaaataag
1611	NO03G05070	ccgggtccgattcccggtgcctgcaATCGCCGTCGTAGAGGGCCAgttttagagctagaaatagcaagttaaaataag
1612	NO03G05080	ccgggtccgattcccggtgcctgcaCTACGTGCGCGACGCAACGAgttttagagctagaaatagcaagttaaaataag
1613	NO03G05090	ccgggtccgattcccggtgcctgcaCATAGTCAAGACCCACTTGGgttttagagctagaaatagcaagttaaaataag
1614	NO03G05100	ccgggtccgattcccggtgcctgcaCGTGCTTTGCTCCACACCCGgttttagagctagaaatagcaagttaaaataag
1615	NO03G05110	ccgggtccgattcccggtgcctgcaGCGTTGGCAACTACCACCGTgttttagagctagaaatagcaagttaaaataag
1616	NO03G05120	ccgggtccgattcccggtgcctgcaTGGGTTCGCGAGAAAGACGTgttttagagctagaaatagcaagttaaaataag
1617	NO03G05130	ccgggtccgattcccggtgcctgcaAATGCCGGGTATGTACGATGgttttagagctagaaatagcaagttaaaataag
1618	NO03G05140	ccgggtccgattcccggtgcctgcaGAACTGCATGATTGTCTGTAgttttagagctagaaatagcaagttaaaataag
1619	NO03G05150	ccgggtccgattcccggtgcctgcaGTGATTGAAGTATTGCACGAgttttagagctagaaatagcaagttaaaataag
1620	NO03G05160	ccgggtccgattcccggtgcctgcaCGGCACAAAAACTCGCGATGgttttagagctagaaatagcaagttaaaataag
1621	NO03G05170	ccgggtccgattcccggtgcctgcaTTCGCAGCAGAAGCCAACAGgttttagagctagaaatagcaagttaaaataag
1622	NO03G05180	ccgggtccgattcccggtgcctgcaTAATATGGTAAACTCATGCGgttttagagctagaaatagcaagttaaaataag
1623	NO03G05200	ccgggtccgattcccggtgcctgcaCATCGAAGAGAACAAACCAGgttttagagctagaaatagcaagttaaaataag
1624	NO03G05210	ccgggtccgattcccggtgcctgcaTGAAGGGTTTGAAACCAGAGgttttagagctagaaatagcaagttaaaataag
1625	NO03G05220	ccgggtccgattcccggtgcctgcaTTTAGTAACAGGTCTTACCGgttttagagctagaaatagcaagttaaaataag
1626	NO03G05230	ccgggtccgattcccggtgcctgcaCATCCGCGACTTCCTCCAGAgttttagagctagaaatagcaagttaaaataag
1627	NO03G05240	ccgggtccgattcccggtgcctgcaCAGTGTTGATACGGTGAGGGgttttagagctagaaatagcaagttaaaataag
1628	NO03G05250	ccgggtccgattcccggtgcctgcaAAGTAGAAGAGGCACGACCGgttttagagctagaaatagcaagttaaaataag
1629	NO03G05260	ccgggtccgattcccggtgcctgcaCGAGAGCGTGAAATTAACGGgttttagagctagaaatagcaagttaaaataag
1630	NO03G05270	ccgggtccgattcccggtgcctgcaAGTGACTGCTTCCAACCTCGgttttagagctagaaatagcaagttaaaataag
1631	NO03G05280	ccgggtccgattcccggtgcctgcaTCCAACCTTAGAGCGTTCGGgttttagagctagaaatagcaagttaaaataag
1632	NO03G05290	ccgggtccgattcccggtgcctgcaAAGTAGCAGTACAACCAAGGgttttagagctagaaatagcaagttaaaataag
1633	NO03G05300	ccgggtccgattcccggtgcctgcaATGTAGATGGAGGATCTCTGgttttagagctagaaatagcaagttaaaataag
1634	NO03G05310	ccgggtccgattcccggtgcctgcaAAGTGTCAGACAGATCACCAgttttagagctagaaatagcaagttaaaataag
1635	NO03G05320	ccgggtccgattcccggtgcctgcaGTGTACTCGTAGATGTCCTGgttttagagctagaaatagcaagttaaaataag
1636	NO03G05330	ccgggtccgattcccggtgcctgcaGGTCCATACGAAGGAACAAGgttttagagctagaaatagcaagttaaaataag
1637	NO03G05340	ccgggtccgattcccggtgcctgcaGGCATCAGGAAACTCCAACAgttttagagctagaaatagcaagttaaaataag
1638	NO03G05350	ccgggtccgattcccggtgcctgcaACTCAATGATGTCCTCATCAgttttagagctagaaatagcaagttaaaataag
1639	NO03G05360	ccgggtccgattcccggtgcctgcaAAACGTCTGCAAGAGCTGAGgttttagagctagaaatagcaagttaaaataag
1640	NO03G05370	ccgggtccgattcccggtgcctgcaCGGCCATGCTGAGACCAGGGgttttagagctagaaatagcaagttaaaataag
1641	NO03G05380	ccgggtccgattcccggtgcctgcaTCGTCTAAGAAAAGAAACCGgttttagagctagaaatagcaagttaaaataag
1642	NO03G05390	ccgggtccgattcccggtgcctgcaGACGACGCATGCAAGACAGTgttttagagctagaaatagcaagttaaaataag
1643	NO03G05400	ccgggtccgattcccggtgcctgcaACGTGGTAGAGACTGGTAGGgttttagagctagaaatagcaagttaaaataag
1644	NO03G05410	ccgggtccgattcccggtgcctgcaTCGTGCATGTCAACTTCCCGgttttagagctagaaatagcaagttaaaataag
1645	NO03G05420	ccgggtccgattcccggtgcctgcaGGGAACGCGTATAGTAAGCAgttttagagctagaaatagcaagttaaaataag
1646	NO03G05430	ccgggtccgattcccggtgcctgcaACGAAGGTAATTCTGCGTCGgttttagagctagaaatagcaagttaaaataag
1647	NO03G05440	ccgggtccgattcccggtgcctgcaATGCCTGAACACTACCGACGgttttagagctagaaatagcaagttaaaataag
1648	NO03G05450	ccgggtccgattcccggtgcctgcaGAGTATGTTGAGAACCAAGGgttttagagctagaaatagcaagttaaaataag
1649	NO03G05460	ccgggtccgattcccggtgcctgcaATCGGGTGAAATACCAACCGgttttagagctagaaatagcaagttaaaataag
1650	NO03G05470	ccgggtccgattcccggtgcctgcaGGCCAGGACAAGACGCGACAgttttagagctagaaatagcaagttaaaataag
1651	NO03G05480	ccgggtccgattcccggtgcctgcaTGTCTTGTACTCAAGCACATgttttagagctagaaatagcaagttaaaataag
1652	NO03G05490	ccgggtccgattcccggtgcctgcaCGTGGAGTTTCACACGAACGgttttagagctagaaatagcaagttaaaataag
1653	NO03G05500	ccgggtccgattcccggtgcctgcaTCGTCGTACAAACCATCCCGgttttagagctagaaatagcaagttaaaataag
1654	NO03G05510	ccgggtccgattcccggtgcctgcaTCTCGCTGGCGCTATCCCCGgttttagagctagaaatagcaagttaaaataag
1655	NO03G05520	ccgggtccgattcccggtgcctgcaGTCCCGCAGACACACATGGGgttttagagctagaaatagcaagttaaaataag
1656	NO03G05530	ccgggtccgattcccggtgcctgcaGGCGCACGGTATTTCCACCAgttttagagctagaaatagcaagttaaaataag
1657	NO03G05540	ccgggtccgattcccggtgcctgcaGCAACAACAGGAAAGCCGGGgttttagagctagaaatagcaagttaaaataag
1658	NO03G05550	ccgggtccgattcccggtgcctgcaGGCGCAGCAAGGTTATAACGgttttagagctagaaatagcaagttaaaataag
1659	NO03G05570	ccgggtccgattcccggtgcctgcaAGCGTGCGTACGAGTCTAGGgttttagagctagaaatagcaagttaaaataag
1660	NO03G05580	ccgggtccgattcccggtgcctgcaAGGGAACGCCTATACCAGTGgttttagagctagaaatagcaagttaaaataag
1661	NO03G05590	ccgggtccgattcccggtgcctgcaGTACATCCTGTGGACCGAGGgttttagagctagaaatagcaagttaaaataag
1662	NO03G05600	ccgggtccgattcccggtgcctgcaCCGACAGTAGTAAGCCGCGGgttttagagctagaaatagcaagttaaaataag
1663	NO03G05610	ccgggtccgattcccggtgcctgcaGACCTTGGCAGTGAACACGTgttttagagctagaaatagcaagttaaaataag
1664	NO03G05620	ccgggtccgattcccggtgcctgcaGTAGCAGGTATCCTCCATGGgttttagagctagaaatagcaagttaaaataag
1665	NO03G05630	ccgggtccgattcccggtgcctgcaTGACTTTCATGAGATCCCCGgttttagagctagaaatagcaagttaaaataag
1666	NO03G05640	ccgggtccgattcccggtgcctgcaCCAACCAGCAAATTCCATTGgttttagagctagaaatagcaagttaaaataag
1667	NO03G05650	ccgggtccgattcccggtgcctgcaATAGCCCGACACGCTCTCCAgttttagagctagaaatagcaagttaaaataag
1668	NO03G05660	ccgggtccgattcccggtgcctgcaGGGAGAGACACCTACTCCAGgttttagagctagaaatagcaagttaaaataag
1669	NO03G05670	ccgggtccgattcccggtgcctgcaTAATGAAAGGATCTGTCGAGgttttagagctagaaatagcaagttaaaataag
1670	NO03G05680	ccgggtccgattcccggtgcctgcaAGTGCGTAAAGAAATCTGGGgttttagagctagaaatagcaagttaaaataag
1671	NO03G05690	ccgggtccgattcccggtgcctgcaCGAGTACCAAGACAAGACAGgttttagagctagaaatagcaagttaaaataag
1672	NO03G05700	ccgggtccgattcccggtgcctgcaCACACATCAGAACTGGATCGgttttagagctagaaatagcaagttaaaataag
1673	NO03G05710	ccgggtccgattcccggtgcctgcaACATAAAACAACCTCTCGCGgttttagagctagaaatagcaagttaaaataag
1674	NO03G05720	ccgggtccgattcccggtgcctgcaGGCGGTCGAATGAAGACGGGgttttagagctagaaatagcaagttaaaataag
1675	NO03G05730	ccgggtccgattcccggtgcctgcaACCATGGAGGGTAACGAAGGgttttagagctagaaatagcaagttaaaataag
1676	NO03G05740	ccgggtccgattcccggtgcctgcaTGGGATGCTCGATATAACAGgttttagagctagaaatagcaagttaaaataag
1677	NO03G05750	ccgggtccgattcccggtgcctgcaGCTCAGGGACCGCTTCAATGgttttagagctagaaatagcaagttaaaataag
1678	NO03G05760	ccgggtccgattcccggtgcctgcaGGAGTCACACGAGTTCCAAGgttttagagctagaaatagcaagttaaaataag
1679	NO03G05770	ccgggtccgattcccggtgcctgcaTCAGGTGTATGTCCTACAGAgttttagagctagaaatagcaagttaaaataag
1680	NO03G05780	ccgggtccgattcccggtgcctgcaTGGAGAGTAGGCCAAGACGGgttttagagctagaaatagcaagttaaaataag
1681	NO03G05790	ccgggtccgattcccggtgcctgcaTTCCGGATATATCACAACGAgttttagagctagaaatagcaagttaaaataag
1682	NO04G00020	ccgggtccgattcccggtgcctgcaTCATCCACTCTGCTGACCAGgttttagagctagaaatagcaagttaaaataag
1683	NO04G00030	ccgggtccgattcccggtgcctgcaGGTGACAAAGATCAGCAGCGgttttagagctagaaatagcaagttaaaataag
1684	NO04G00040	ccgggtccgattcccggtgcctgcaACTTAATTCTCCCAACACCGgttttagagctagaaatagcaagttaaaataag
1685	NO04G00050	ccgggtccgattcccggtgcctgcaGTCGCCCTCTACACGCACAGgttttagagctagaaatagcaagttaaaataag
1686	NO04G00060	ccgggtccgattcccggtgcctgcaTTTTCTGGCAAGGATGACAGgttttagagctagaaatagcaagttaaaataag
1687	NO04G00070	ccgggtccgattcccggtgcctgcaAAGAATCTTAATCCCCTCGGgttttagagctagaaatagcaagttaaaataag
1688	NO04G00080	ccgggtccgattcccggtgcctgcaTGCCATACAGGATAGAGCAAgttttagagctagaaatagcaagttaaaataag
1689	NO04G00090	ccgggtccgattcccggtgcctgcaATGTCCGGATTATACCCGCGgttttagagctagaaatagcaagttaaaataag
1690	NO04G00100	ccgggtccgattcccggtgcctgcaTGACTACAAGAAGACCATCAgttttagagctagaaatagcaagttaaaataag
1691	NO04G00110	ccgggtccgattcccggtgcctgcaGTGCCGTCACAAGCTCAAGAgttttagagctagaaatagcaagttaaaataag
1692	NO04G00120	ccgggtccgattcccggtgcctgcaACCACTTATCAGACAAGCGGgttttagagctagaaatagcaagttaaaataag
1693	NO04G00130	ccgggtccgattcccggtgcctgcaGGGCCGCCAAAAGGAGTTGGgttttagagctagaaatagcaagttaaaataag
1694	NO04G00140	ccgggtccgattcccggtgcctgcaGCACCGAACCGAAATTCAGGgttttagagctagaaatagcaagttaaaataag
1695	NO04G00150	ccgggtccgattcccggtgcctgcaAGACGCTACTGAAAGTGATGgttttagagctagaaatagcaagttaaaataag
1696	NO04G00160	ccgggtccgattcccggtgcctgcaGCAGCCCCGACAAACCCAAGgttttagagctagaaatagcaagttaaaataag
1697	NO04G00170	ccgggtccgattcccggtgcctgcaCAAGATGCTCGGTTGCAAAGgttttagagctagaaatagcaagttaaaataag
1698	NO04G00180	ccgggtccgattcccggtgcctgcaAAGACCTTCACCATGACGGGgttttagagctagaaatagcaagttaaaataag
1699	NO04G00190	ccgggtccgattcccggtgcctgcaTAGACAAAATACGGGGCGCAgttttagagctagaaatagcaagttaaaataag
1700	NO04G00200	ccgggtccgattcccggtgcctgcaTCCGACCATACACTTCCACGgttttagagctagaaatagcaagttaaaataag
1701	NO04G00210	ccgggtccgattcccggtgcctgcaGGATAATCACCAATGCTGGGgttttagagctagaaatagcaagttaaaataag
1702	NO04G00220	ccgggtccgattcccggtgcctgcaCGGGACGCAAGATATTGTGAgttttagagctagaaatagcaagttaaaataag
1703	NO04G00230	ccgggtccgattcccggtgcctgcaTCCTCCTCTGAAACCAACTGgttttagagctagaaatagcaagttaaaataag
1704	NO04G00240	ccgggtccgattcccggtgcctgcaTCACCTCCTCGCTTACAACGgttttagagctagaaatagcaagttaaaataag
1705	NO04G00250	ccgggtccgattcccggtgcctgcaGAGACGACGATCTTGACCGAgttttagagctagaaatagcaagttaaaataag
1706	NO04G00260	ccgggtccgattcccggtgcctgcaCGTTGAAGGCATCACCGTCGgttttagagctagaaatagcaagttaaaataag
1707	NO04G00270	ccgggtccgattcccggtgcctgcaAAAGTTGTGGCATGTTCGTGgttttagagctagaaatagcaagttaaaataag
1708	NO04G00280	ccgggtccgattcccggtgcctgcaCCCACCCCGTAAGACCTACGgttttagagctagaaatagcaagttaaaataag
1709	NO04G00290	ccgggtccgattcccggtgcctgcaGGGTCTCTATGACATCATGGgttttagagctagaaatagcaagttaaaataag
1710	NO04G00300	ccgggtccgattcccggtgcctgcaATGTGCCGGATCGACCACATgttttagagctagaaatagcaagttaaaataag
1711	NO04G00310	ccgggtccgattcccggtgcctgcaTAGTCTTTGAGGAATATGCGgttttagagctagaaatagcaagttaaaataag
1712	NO04G00320	ccgggtccgattcccggtgcctgcaCAGTTGGGGATGCTCCTCGGgttttagagctagaaatagcaagttaaaataag
1713	NO04G00330	ccgggtccgattcccggtgcctgcaTGTTGGTCAAGAACGGCCAGgttttagagctagaaatagcaagttaaaataag
1714	NO04G00340	ccgggtccgattcccggtgcctgcaTCGGTGGTAGAAGTACAGCGgttttagagctagaaatagcaagttaaaataag
1715	NO04G00350	ccgggtccgattcccggtgcctgcaTCCTATGAGGCCTACATCAGgttttagagctagaaatagcaagttaaaataag
1716	NO04G00360	ccgggtccgattcccggtgcctgcaTGGACGAGCTGAGTTTGACGgttttagagctagaaatagcaagttaaaataag
1717	NO04G00370	ccgggtccgattcccggtgcctgcaTGGAAAGGAGAACTGCGATGgttttagagctagaaatagcaagttaaaataag
1718	NO04G00380	ccgggtccgattcccggtgcctgcaACGATGAATCGTACGCCCGGgttttagagctagaaatagcaagttaaaataag
1719	NO04G00390	ccgggtccgattcccggtgcctgcaGAAAAATTGCAAAAGCGGCGgttttagagctagaaatagcaagttaaaataag
1720	NO04G00400	ccgggtccgattcccggtgcctgcaTTCAAATGTGAATCTGCCTGgttttagagctagaaatagcaagttaaaataag
1721	NO04G00410	ccgggtccgattcccggtgcctgcaATTGAATCTTACTCGCCCTGgttttagagctagaaatagcaagttaaaataag
1722	NO04G00420	ccgggtccgattcccggtgcctgcaGAGGACCACGTCACCCACAGgttttagagctagaaatagcaagttaaaataag
1723	NO04G00430	ccgggtccgattcccggtgcctgcaGTGGTAATTGAACATGCCATgttttagagctagaaatagcaagttaaaataag
1724	NO04G00440	ccgggtccgattcccggtgcctgcaGGGTACTTTGGCGTGAACGGgttttagagctagaaatagcaagttaaaataag
1725	NO04G00450	ccgggtccgattcccggtgcctgcaGCCCTCGGATGATGCCAAAGgttttagagctagaaatagcaagttaaaataag
1726	NO04G00460	ccgggtccgattcccggtgcctgcaTGTCTTCGAAGTAGTGGTAGgttttagagctagaaatagcaagttaaaataag
1727	NO04G00470	ccgggtccgattcccggtgcctgcaGGTGTACTTTGGAGACAACGgttttagagctagaaatagcaagttaaaataag
1728	NO04G00480	ccgggtccgattcccggtgcctgcaACCAGACCATAAGGACCTCGgttttagagctagaaatagcaagttaaaataag
1729	NO04G00490	ccgggtccgattcccggtgcctgcaCAAGGGCCACCAATGCGACGgttttagagctagaaatagcaagttaaaataag
1730	NO04G00500	ccgggtccgattcccggtgcctgcaGGAGTTGGCAGAATTCAACGgttttagagctagaaatagcaagttaaaataag
1731	NO04G00510	ccgggtccgattcccggtgcctgcaAAGCTCCCCGTAGCAAACGTgttttagagctagaaatagcaagttaaaataag
1732	NO04G00520	ccgggtccgattcccggtgcctgcaCGCCCCTTCCAAATGCAAAGgttttagagctagaaatagcaagttaaaataag
1733	NO04G00530	ccgggtccgattcccggtgcctgcaCATGTGTGCGAAGTTCCGTGgttttagagctagaaatagcaagttaaaataag
1734	NO04G00540	ccgggtccgattcccggtgcctgcaCCCTAAACTGAATCAATGGGgttttagagctagaaatagcaagttaaaataag
1735	NO04G00550	ccgggtccgattcccggtgcctgcaGTTTTTTAGGAGTATTTCAGgttttagagctagaaatagcaagttaaaataag
1736	NO04G00560	ccgggtccgattcccggtgcctgcaCGTTTGGCCCAGCTTCGAAAgttttagagctagaaatagcaagttaaaataag
1737	NO04G00570	ccgggtccgattcccggtgcctgcaTTCCGGTGGAGCAAAAACTGgttttagagctagaaatagcaagttaaaataag
1738	NO04G00580	ccgggtccgattcccggtgcctgcaACGGACGCGTTTTCGCAAGGgttttagagctagaaatagcaagttaaaataag
1739	NO04G00590	ccgggtccgattcccggtgcctgcaTCATCATCGTCGTAACGGCGgttttagagctagaaatagcaagttaaaataag
1740	NO04G00600	ccgggtccgattcccggtgcctgcaGTCACCCTCATTGACCTCTGgttttagagctagaaatagcaagttaaaataag
1741	NO04G00610	ccgggtccgattcccggtgcctgcaGTGAATCTGGATGTGTTGGAgttttagagctagaaatagcaagttaaaataag
1742	NO04G00620	ccgggtccgattcccggtgcctgcaACTTTGCCAAGCTCGCCACGgttttagagctagaaatagcaagttaaaataag
1743	NO04G00630	ccgggtccgattcccggtgcctgcaGCAAAAAGATCGTTCGCCGAgttttagagctagaaatagcaagttaaaataag
1744	NO04G00640	ccgggtccgattcccggtgcctgcaAGAACTTCGGTAGACGAGAGgttttagagctagaaatagcaagttaaaataag
1745	NO04G00660	ccgggtccgattcccggtgcctgcaCAGTGACAGAAAATAAAGGGgttttagagctagaaatagcaagttaaaataag
1746	NO04G00670	ccgggtccgattcccggtgcctgcaCCTACAAATGCTCAGACCAGgttttagagctagaaatagcaagttaaaataag
1747	NO04G00680	ccgggtccgattcccggtgcctgcaCTGAACGTAGGGGGAGACAAgttttagagctagaaatagcaagttaaaataag
1748	NO04G00690	ccgggtccgattcccggtgcctgcaGGACGCGCCGACATTCACGGgttttagagctagaaatagcaagttaaaataag
1749	NO04G00700	ccgggtccgattcccggtgcctgcaGTTATTCGTACCCACACTGGgttttagagctagaaatagcaagttaaaataag
1750	NO04G00710	ccgggtccgattcccggtgcctgcaTTGGGCAAACTGGAGCATGGgttttagagctagaaatagcaagttaaaataag
1751	NO04G00720	ccgggtccgattcccggtgcctgcaGATTAACACCATTATCAACGgttttagagctagaaatagcaagttaaaataag
1752	NO04G00730	ccgggtccgattcccggtgcctgcaCACAGCACATTAAACCACGAgttttagagctagaaatagcaagttaaaataag
1753	NO04G00740	ccgggtccgattcccggtgcctgcaACTGTTGTAGAAGATGAATGgttttagagctagaaatagcaagttaaaataag
1754	NO04G00750	ccgggtccgattcccggtgcctgcaGGATGAGATAGAGTACCTAGgttttagagctagaaatagcaagttaaaataag
1755	NO04G00760	ccgggtccgattcccggtgcctgcaCTAAGATTAGGAAAGTTCGGgttttagagctagaaatagcaagttaaaataag
1756	NO04G00770	ccgggtccgattcccggtgcctgcaTGCAGCATGATAGACCCCGTgttttagagctagaaatagcaagttaaaataag
1757	NO04G00780	ccgggtccgattcccggtgcctgcaGCCTCGAACAAACAACGCAGgttttagagctagaaatagcaagttaaaataag
1758	NO04G00790	ccgggtccgattcccggtgcctgcaCGTCAAATCCCCGAGCATCGgttttagagctagaaatagcaagttaaaataag
1759	NO04G00800	ccgggtccgattcccggtgcctgcaGCTCTCCAACACCATCGAGAgttttagagctagaaatagcaagttaaaataag
1760	NO04G00810	ccgggtccgattcccggtgcctgcaAGTGCGGATTAGGTCGACGTgttttagagctagaaatagcaagttaaaataag
1761	NO04G00820	ccgggtccgattcccggtgcctgcaGCCATCAAAAGAATAGACAAgttttagagctagaaatagcaagttaaaataag
1762	NO04G00830	ccgggtccgattcccggtgcctgcaTATGGCATCAAGCTTGACCAgttttagagctagaaatagcaagttaaaataag
1763	NO04G00840	ccgggtccgattcccggtgcctgcaTGGCTGGTAAGTTCGCGGAGgttttagagctagaaatagcaagttaaaataag
1764	NO04G00850	ccgggtccgattcccggtgcctgcaTGATCGATCGACGTTCTCGGgttttagagctagaaatagcaagttaaaataag
1765	NO04G00860	ccgggtccgattcccggtgcctgcaAGACAGGAAGAAATGCGCGGgttttagagctagaaatagcaagttaaaataag
1766	NO04G00870	ccgggtccgattcccggtgcctgcaTAACACATCATACTACAAGGgttttagagctagaaatagcaagttaaaataag
1767	NO04G00880	ccgggtccgattcccggtgcctgcaAGCGGCGCTTTACGACCTTGgttttagagctagaaatagcaagttaaaataag
1768	NO04G00890	ccgggtccgattcccggtgcctgcaGAATAGCGTGAAGAGGCCCAgttttagagctagaaatagcaagttaaaataag
1769	NO04G00900	ccgggtccgattcccggtgcctgcaACAATAACAACCGAGGACAAgttttagagctagaaatagcaagttaaaataag
1770	NO04G00910	ccgggtccgattcccggtgcctgcaGTGGAGGATAAAGCAAACCAgttttagagctagaaatagcaagttaaaataag
1771	NO04G00920	ccgggtccgattcccggtgcctgcaAAACGTTCAAGCAAAAGCCGgttttagagctagaaatagcaagttaaaataag
1772	NO04G00930	ccgggtccgattcccggtgcctgcaGTACAGGTAGCGAAAGCACTgttttagagctagaaatagcaagttaaaataag
1773	NO04G00940	ccgggtccgattcccggtgcctgcaCAAGCGCAGTACAAACACGGgttttagagctagaaatagcaagttaaaataag
1774	NO04G00950	ccgggtccgattcccggtgcctgcaGGCAAGTCTATCTCCCCCGCgttttagagctagaaatagcaagttaaaataag
1775	NO04G00960	ccgggtccgattcccggtgcctgcaGTACTCGGCAACTTGCATGGgttttagagctagaaatagcaagttaaaataag
1776	NO04G00970	ccgggtccgattcccggtgcctgcaATGTGAGTTCCATTGCACGAgttttagagctagaaatagcaagttaaaataag
1777	NO04G00980	ccgggtccgattcccggtgcctgcaTGGAGTATGAGACACCCAAGgttttagagctagaaatagcaagttaaaataag
1778	NO04G00990	ccgggtccgattcccggtgcctgcaTCCGGGAGCGAATGGTCACGgttttagagctagaaatagcaagttaaaataag
1779	NO04G01000	ccgggtccgattcccggtgcctgcaATATGTGTTGCAATGCCACGgttttagagctagaaatagcaagttaaaataag
1780	NO04G01020	ccgggtccgattcccggtgcctgcaAAACGTGAGTGAAAGCATGGgttttagagctagaaatagcaagttaaaataag
1781	NO04G01030	ccgggtccgattcccggtgcctgcaGCCCGGCTTGACACAAAGAGgttttagagctagaaatagcaagttaaaataag
1782	NO04G01040	ccgggtccgattcccggtgcctgcaGGAAGACAAACTCCGAAGTGgttttagagctagaaatagcaagttaaaataag
1783	NO04G01050	ccgggtccgattcccggtgcctgcaCGTATTGACGATGCCGTGAGgttttagagctagaaatagcaagttaaaataag
1784	NO04G01060	ccgggtccgattcccggtgcctgcaCTGCAAATGCTTCCCCACCGgttttagagctagaaatagcaagttaaaataag
1785	NO04G01070	ccgggtccgattcccggtgcctgcaCTACCAGTACGTGATTATGGgttttagagctagaaatagcaagttaaaataag
1786	NO04G01080	ccgggtccgattcccggtgcctgcaGCTGCGCGAGATACTGACGCgttttagagctagaaatagcaagttaaaataag
1787	NO04G01090	ccgggtccgattcccggtgcctgcaGTCGAAGGGATGGAACACGGgttttagagctagaaatagcaagttaaaataag
1788	NO04G01100	ccgggtccgattcccggtgcctgcaGCACTATGGAGCGAAAAGTGgttttagagctagaaatagcaagttaaaataag
1789	NO04G01110	ccgggtccgattcccggtgcctgcaAGGGCCTATACTGACCTGGGgttttagagctagaaatagcaagttaaaataag
1790	NO04G01120	ccgggtccgattcccggtgcctgcaTGTCAAGAGGCTGATCAAGGgttttagagctagaaatagcaagttaaaataag
1791	NO04G01130	ccgggtccgattcccggtgcctgcaAAGGAGGAGGAATATAACACgttttagagctagaaatagcaagttaaaataag
1792	NO04G01140	ccgggtccgattcccggtgcctgcaAAAGGCACGAACCAACATCAgttttagagctagaaatagcaagttaaaataag
1793	NO04G01150	ccgggtccgattcccggtgcctgcaGGACGCATCAGACTTAATGGgttttagagctagaaatagcaagttaaaataag
1794	NO04G01160	ccgggtccgattcccggtgcctgcaAAGTATACCTTTGAACTGGGgttttagagctagaaatagcaagttaaaataag
1795	NO04G01170	ccgggtccgattcccggtgcctgcaCTGAATGGAAAAGTACCGCGgttttagagctagaaatagcaagttaaaataag
1796	NO04G01180	ccgggtccgattcccggtgcctgcaGCCAGCTCAAGACCTTATTGgttttagagctagaaatagcaagttaaaataag
1797	NO04G01190	ccgggtccgattcccggtgcctgcaTAGTAAGCACTTGATCAAAGgttttagagctagaaatagcaagttaaaataag
1798	NO04G01200	ccgggtccgattcccggtgcctgcaCAAGCGTGACACTAATACGGgttttagagctagaaatagcaagttaaaataag
1799	NO04G01210	ccgggtccgattcccggtgcctgcaGGTAACCTAGAAGCTCTCGGgttttagagctagaaatagcaagttaaaataag
1800	NO04G01220	ccgggtccgattcccggtgcctgcaAATCGGCGCCAAATTCTGGGgttttagagctagaaatagcaagttaaaataag
1801	NO04G01230	ccgggtccgattcccggtgcctgcaGCATAGTTTTACAGACAACGgttttagagctagaaatagcaagttaaaataag
1802	NO04G01250	ccgggtccgattcccggtgcctgcaGGGGGACGAGATGTATATCGgttttagagctagaaatagcaagttaaaataag
1803	NO04G01260	ccgggtccgattcccggtgcctgcaAATAGTGGAAGCGAGTAGGGgttttagagctagaaatagcaagttaaaataag
1804	NO04G01270	ccgggtccgattcccggtgcctgcaAAGCTCAAGAAGACGCACCGgttttagagctagaaatagcaagttaaaataag
1805	NO04G01280	ccgggtccgattcccggtgcctgcaACTACGTGGAGAACCAGACGgttttagagctagaaatagcaagttaaaataag
1806	NO04G01300	ccgggtccgattcccggtgcctgcaTGGCAGCGACAACACTCCCGgttttagagctagaaatagcaagttaaaataag
1807	NO04G01310	ccgggtccgattcccggtgcctgcaCTGCTGGGGCGTCTTGACAGgttttagagctagaaatagcaagttaaaataag
1808	NO04G01320	ccgggtccgattcccggtgcctgcaGGGGACGTTATCATCGACGGgttttagagctagaaatagcaagttaaaataag
1809	NO04G01330	ccgggtccgattcccggtgcctgcaTGGGGCGAATCCGAACAAAGgttttagagctagaaatagcaagttaaaataag
1810	NO04G01340	ccgggtccgattcccggtgcctgcaATGCCAGTTGATCCACACCGgttttagagctagaaatagcaagttaaaataag
1811	NO04G01350	ccgggtccgattcccggtgcctgcaTGAATGATCAAACAACACGTgttttagagctagaaatagcaagttaaaataag
1812	NO04G01360	ccgggtccgattcccggtgcctgcaAACGTCGTGAGCATGGACAAgttttagagctagaaatagcaagttaaaataag
1813	NO04G01380	ccgggtccgattcccggtgcctgcaGATATGTAAAAACAGCACCGgttttagagctagaaatagcaagttaaaataag
1814	NO04G01390	ccgggtccgattcccggtgcctgcaAAAAACGCAGCATCGCCCGGgttttagagctagaaatagcaagttaaaataag
1815	NO04G01400	ccgggtccgattcccggtgcctgcaCATGTATATCCTGGACGAAGgttttagagctagaaatagcaagttaaaataag
1816	NO04G01410	ccgggtccgattcccggtgcctgcaAAGACGAAGAGAAATGCCAGgttttagagctagaaatagcaagttaaaataag
1817	NO04G01420	ccgggtccgattcccggtgcctgcaTTGAGCGTGATAATGTGCAGgttttagagctagaaatagcaagttaaaataag
1818	NO04G01430	ccgggtccgattcccggtgcctgcaATTCGCTTCATCATCCACAGgttttagagctagaaatagcaagttaaaataag
1819	NO04G01440	ccgggtccgattcccggtgcctgcaCTGTCATTGCCTCTGCTGCGgttttagagctagaaatagcaagttaaaataag
1820	NO04G01450	ccgggtccgattcccggtgcctgcaAAAGCTACCTCTCACCTGCGgttttagagctagaaatagcaagttaaaataag
1821	NO04G01460	ccgggtccgattcccggtgcctgcaGGATGTACAGAGCCGACGCAgttttagagctagaaatagcaagttaaaataag
1822	NO04G01470	ccgggtccgattcccggtgcctgcaATGCATCTGGAACTCCAACAgttttagagctagaaatagcaagttaaaataag
1823	NO04G01480	ccgggtccgattcccggtgcctgcaAGAGACGTCGATGTCAAGGGgttttagagctagaaatagcaagttaaaataag
1824	NO04G01490	ccgggtccgattcccggtgcctgcaTATGCACACCACTCTTGCCAgttttagagctagaaatagcaagttaaaataag
1825	NO04G01500	ccgggtccgattcccggtgcctgcaGTGGACATCAGTGAGAGGAGgttttagagctagaaatagcaagttaaaataag
1826	NO04G01510	ccgggtccgattcccggtgcctgcaGGGACATGTCGTCCTCACGCgttttagagctagaaatagcaagttaaaataag
1827	NO04G01520	ccgggtccgattcccggtgcctgcaCAGGCTGATACTTTGCAGGGgttttagagctagaaatagcaagttaaaataag
1828	NO04G01530	ccgggtccgattcccggtgcctgcaTATTTGATAAGGATGAAGCGgttttagagctagaaatagcaagttaaaataag
1829	NO04G01540	ccgggtccgattcccggtgcctgcaTTGTAGTGGATATGGTGCTGgttttagagctagaaatagcaagttaaaataag
1830	NO04G01550	ccgggtccgattcccggtgcctgcaGCTTGCGTTGGCAATGACCGgttttagagctagaaatagcaagttaaaataag
1831	NO04G01560	ccgggtccgattcccggtgcctgcaCTCTTCCTCTTCGTAGACAGgttttagagctagaaatagcaagttaaaataag
1832	NO04G01570	ccgggtccgattcccggtgcctgcaAGGGGTCGGAGATGCCAAGGgttttagagctagaaatagcaagttaaaataag
1833	NO04G01580	ccgggtccgattcccggtgcctgcaGGCCCGCTTTAAGAAGACCGgttttagagctagaaatagcaagttaaaataag
1834	NO04G01590	ccgggtccgattcccggtgcctgcaGCATACACGTTTGCAACCCGgttttagagctagaaatagcaagttaaaataag
1835	NO04G01600	ccgggtccgattcccggtgcctgcaCGGGAAGACATGCCGTGTGGgttttagagctagaaatagcaagttaaaataag
1836	NO04G01610	ccgggtccgattcccggtgcctgcaGGCGTGGTCGATCTGACGCGgttttagagctagaaatagcaagttaaaataag
1837	NO04G01620	ccgggtccgattcccggtgcctgcaGGAGATTGTAAGCTACCCGGgttttagagctagaaatagcaagttaaaataag
1838	NO04G01630	ccgggtccgattcccggtgcctgcaTCTGATTTGTGTGTCCCTGAgttttagagctagaaatagcaagttaaaataag
1839	NO04G01640	ccgggtccgattcccggtgcctgcaAATGTCCTCCTTCACAACCGgttttagagctagaaatagcaagttaaaataag
1840	NO04G01650	ccgggtccgattcccggtgcctgcaCGTCATGGCAAAGATGATTGgttttagagctagaaatagcaagttaaaataag
1841	NO04G01660	ccgggtccgattcccggtgcctgcaCCCGACAATGACGACACCAGgttttagagctagaaatagcaagttaaaataag
1842	NO04G01670	ccgggtccgattcccggtgcctgcaTGGCTGTGACTGCAAGACGTgttttagagctagaaatagcaagttaaaataag
1843	NO04G01680	ccgggtccgattcccggtgcctgcaGTACCATCCATATCCGCCCGgttttagagctagaaatagcaagttaaaataag
1844	NO04G01690	ccgggtccgattcccggtgcctgcaGGAACGAGTCGGTGACACAGgttttagagctagaaatagcaagttaaaataag
1845	NO04G01700	ccgggtccgattcccggtgcctgcaACAAAGTAAAGCAAGTAACGgttttagagctagaaatagcaagttaaaataag
1846	NO04G01710	ccgggtccgattcccggtgcctgcaATCCCACCAAGACGACACCAgttttagagctagaaatagcaagttaaaataag
1847	NO04G01720	ccgggtccgattcccggtgcctgcaAATGTAGACGGTACAAATGGgttttagagctagaaatagcaagttaaaataag
1848	NO04G01730	ccgggtccgattcccggtgcctgcaGAGAAGAAGGCAGGTCCTGGgttttagagctagaaatagcaagttaaaataag
1849	NO04G01740	ccgggtccgattcccggtgcctgcaCCGTATTCCTTCCTGCCGGGgttttagagctagaaatagcaagttaaaataag
1850	NO04G01750	ccgggtccgattcccggtgcctgcaATGATGTCGATCTGTCTCTGgttttagagctagaaatagcaagttaaaataag
1851	NO04G01760	ccgggtccgattcccggtgcctgcaGTAGCTCATTTCTCTCACGAgttttagagctagaaatagcaagttaaaataag
1852	NO04G01770	ccgggtccgattcccggtgcctgcaAGAGCTCAAAGCATCAAACGgttttagagctagaaatagcaagttaaaataag
1853	NO04G01780	ccgggtccgattcccggtgcctgcaAGACGAGGATGCTTGCAACGgttttagagctagaaatagcaagttaaaataag
1854	NO04G01790	ccgggtccgattcccggtgcctgcaATGTGTCTACCTCTAAGACGgttttagagctagaaatagcaagttaaaataag
1855	NO04G01800	ccgggtccgattcccggtgcctgcaATACCAATAGAGGTGCTGGGgttttagagctagaaatagcaagttaaaataag
1856	NO04G01810	ccgggtccgattcccggtgcctgcaCCGCAATAGCTCGACGACCAgttttagagctagaaatagcaagttaaaataag
1857	NO04G01820	ccgggtccgattcccggtgcctgcaAGTGAGTTGTGAAATCAAAGgttttagagctagaaatagcaagttaaaataag
1858	NO04G01830	ccgggtccgattcccggtgcctgcaGTAAGCGTGTACCAACCAGGgttttagagctagaaatagcaagttaaaataag
1859	NO04G01840	ccgggtccgattcccggtgcctgcaGCGTATACAGGATGCCTTTGgttttagagctagaaatagcaagttaaaataag
1860	NO04G01850	ccgggtccgattcccggtgcctgcaACAAGACCAGTAACACCCAGgttttagagctagaaatagcaagttaaaataag
1861	NO04G01860	ccgggtccgattcccggtgcctgcaGCAACAAAAGAAAGTCACAGgttttagagctagaaatagcaagttaaaataag
1862	NO04G01870	ccgggtccgattcccggtgcctgcaAGTGTCTGTATTGAGAACAGgttttagagctagaaatagcaagttaaaataag
1863	NO04G01880	ccgggtccgattcccggtgcctgcaCCTGCTGCTCATCTACACCGgttttagagctagaaatagcaagttaaaataag
1864	NO04G01890	ccgggtccgattcccggtgcctgcaGATCCTGTTATCGAACAAGGgttttagagctagaaatagcaagttaaaataag
1865	NO04G01910	ccgggtccgattcccggtgcctgcaCAGTGCCCTCTACTCGACGGgttttagagctagaaatagcaagttaaaataag
1866	NO04G01920	ccgggtccgattcccggtgcctgcaGGTACCAAAAGAGACCCGTGgttttagagctagaaatagcaagttaaaataag
1867	NO04G01930	ccgggtccgattcccggtgcctgcaGCTCCTGGGTTCCTACACCAgttttagagctagaaatagcaagttaaaataag
1868	NO04G01940	ccgggtccgattcccggtgcctgcaGAGCGACCACATAGCTCTGGgttttagagctagaaatagcaagttaaaataag
1869	NO04G01950	ccgggtccgattcccggtgcctgcaGCACGACGTTATGGGGCACGgttttagagctagaaatagcaagttaaaataag
1870	NO04G01960	ccgggtccgattcccggtgcctgcaGGAACATCGTCTGCTCAAGGgttttagagctagaaatagcaagttaaaataag
1871	NO04G01970	ccgggtccgattcccggtgcctgcaTAAGACAATCACCCTCGATGgttttagagctagaaatagcaagttaaaataag
1872	NO04G01980	ccgggtccgattcccggtgcctgcaCGAGACCCTCCTAGACAAGGgttttagagctagaaatagcaagttaaaataag
1873	NO04G01990	ccgggtccgattcccggtgcctgcaGTGTTGTATCAGAACGACGAgttttagagctagaaatagcaagttaaaataag
1874	NO04G02000	ccgggtccgattcccggtgcctgcaTGGCAGTCGCAAGTACTACGgttttagagctagaaatagcaagttaaaataag
1875	NO04G02010	ccgggtccgattcccggtgcctgcaCAGATCATGACTTTGTTGGGgttttagagctagaaatagcaagttaaaataag
1876	NO04G02020	ccgggtccgattcccggtgcctgcaGAACTTGGACCCGTACACGAgttttagagctagaaatagcaagttaaaataag
1877	NO04G02030	ccgggtccgattcccggtgcctgcaCTTGGCATTAGGGAGCACAGgttttagagctagaaatagcaagttaaaataag
1878	NO04G02040	ccgggtccgattcccggtgcctgcaCAGACCTTACGTGGCATGGGgttttagagctagaaatagcaagttaaaataag
1879	NO04G02050	ccgggtccgattcccggtgcctgcaTCGTCATCGTCCTTACCGGGgttttagagctagaaatagcaagttaaaataag
1880	NO04G02060	ccgggtccgattcccggtgcctgcaACGCCCAGGAAAAAACAAAGgttttagagctagaaatagcaagttaaaataag
1881	NO04G02070	ccgggtccgattcccggtgcctgcaCGTCGTCGACAGTCACCAAGgttttagagctagaaatagcaagttaaaataag
1882	NO04G02080	ccgggtccgattcccggtgcctgcaGGTTAGAATACACATCACCAgttttagagctagaaatagcaagttaaaataag
1883	NO04G02090	ccgggtccgattcccggtgcctgcaGGGTCTTTCAGAATCCAAAGgttttagagctagaaatagcaagttaaaataag
1884	NO04G02100	ccgggtccgattcccggtgcctgcaGTTAGGGTCGTTGTTGCTCGgttttagagctagaaatagcaagttaaaataag
1885	NO04G02110	ccgggtccgattcccggtgcctgcaAGCGGCGCAACACTTAAACGgttttagagctagaaatagcaagttaaaataag
1886	NO04G02120	ccgggtccgattcccggtgcctgcaGGACATTGACTGCTACAGAGgttttagagctagaaatagcaagttaaaataag
1887	NO04G02130	ccgggtccgattcccggtgcctgcaTGGCCCCTATTACTACCCAAgttttagagctagaaatagcaagttaaaataag
1888	NO04G02140	ccgggtccgattcccggtgcctgcaGGCCGGATCAAAGATGAGGGgttttagagctagaaatagcaagttaaaataag
1889	NO04G02150	ccgggtccgattcccggtgcctgcaGCAGGGGCGAGTAAAAGTGTgttttagagctagaaatagcaagttaaaataag
1890	NO04G02160	ccgggtccgattcccggtgcctgcaGCAACCCTGTGATTGTTGAGgttttagagctagaaatagcaagttaaaataag
1891	NO04G02170	ccgggtccgattcccggtgcctgcaAAAGCCCTGGGCAATAGTGGgttttagagctagaaatagcaagttaaaataag
1892	NO04G02180	ccgggtccgattcccggtgcctgcaAATCCTTGGAAAAAAAACCGgttttagagctagaaatagcaagttaaaataag
1893	NO04G02190	ccgggtccgattcccggtgcctgcaTAGTACAAGACCCAATTGGGgttttagagctagaaatagcaagttaaaataag
1894	NO04G02200	ccgggtccgattcccggtgcctgcaGCTTTGACCACTGAGAGGGAgttttagagctagaaatagcaagttaaaataag
1895	NO04G02210	ccgggtccgattcccggtgcctgcaTCAATCGTCGATATCTGTGTgttttagagctagaaatagcaagttaaaataag
1896	NO04G02220	ccgggtccgattcccggtgcctgcaTCGCAACGAAGAGTTTGACGgttttagagctagaaatagcaagttaaaataag
1897	NO04G02230	ccgggtccgattcccggtgcctgcaCATGGATGCACGATCCTGAGgttttagagctagaaatagcaagttaaaataag
1898	NO04G02260	ccgggtccgattcccggtgcctgcaGTTCCAGATGCTCATCGATAgttttagagctagaaatagcaagttaaaataag
1899	NO04G02500	ccgggtccgattcccggtgcctgcaCTTCGCAAGGAGATAACCAGgttttagagctagaaatagcaagttaaaataag
1900	NO04G02510	ccgggtccgattcccggtgcctgcaAATTTTCGACTACACCCTTGgttttagagctagaaatagcaagttaaaataag
1901	NO04G02520	ccgggtccgattcccggtgcctgcaCCACAGAAAGTACATAACCAgttttagagctagaaatagcaagttaaaataag
1902	NO04G02530	ccgggtccgattcccggtgcctgcaGTGGCAAGAACACTATCGCGgttttagagctagaaatagcaagttaaaataag
1903	NO04G02540	ccgggtccgattcccggtgcctgcaAGATTTTGGAGCAATATCCGgttttagagctagaaatagcaagttaaaataag
1904	NO04G02550	ccgggtccgattcccggtgcctgcaACCCGCACATAGACACAGGAgttttagagctagaaatagcaagttaaaataag
1905	NO04G02560	ccgggtccgattcccggtgcctgcaTTGTTTTCCAGTGTTCTTGGgttttagagctagaaatagcaagttaaaataag
1906	NO04G02570	ccgggtccgattcccggtgcctgcaACGGGAGTACCACGTCCGAGgttttagagctagaaatagcaagttaaaataag
1907	NO04G02590	ccgggtccgattcccggtgcctgcaCATTGATACAGGTGACAAAGgttttagagctagaaatagcaagttaaaataag
1908	NO04G02600	ccgggtccgattcccggtgcctgcaGGCATTGCTGATGAGTGGAAgttttagagctagaaatagcaagttaaaataag
1909	NO04G02610	ccgggtccgattcccggtgcctgcaGTAGCTGCTCGAGGGCATGGgttttagagctagaaatagcaagttaaaataag
1910	NO04G02620	ccgggtccgattcccggtgcctgcaCGCGGCGTGTTAGGTCACAGgttttagagctagaaatagcaagttaaaataag
1911	NO04G02630	ccgggtccgattcccggtgcctgcaTGGTCTACGTCATTATTACGgttttagagctagaaatagcaagttaaaataag
1912	NO04G02640	ccgggtccgattcccggtgcctgcaTCCAGCCAACAACGCCACGAgttttagagctagaaatagcaagttaaaataag
1913	NO04G02650	ccgggtccgattcccggtgcctgcaATTTGGAGGAGATCTGAATGgttttagagctagaaatagcaagttaaaataag
1914	NO04G02660	ccgggtccgattcccggtgcctgcaGTTCGTCACGCTCATCACCAgttttagagctagaaatagcaagttaaaataag
1915	NO04G02670	ccgggtccgattcccggtgcctgcaTTAACACTTACCATAAGCCAgttttagagctagaaatagcaagttaaaataag
1916	NO04G02680	ccgggtccgattcccggtgcctgcaGTCCACCGCTTATGGCACCGgttttagagctagaaatagcaagttaaaataag
1917	NO04G02690	ccgggtccgattcccggtgcctgcaGTAAAGATAAGGCTCATCGGgttttagagctagaaatagcaagttaaaataag
1918	NO04G02700	ccgggtccgattcccggtgcctgcaTAAGTGAAACAAGAGCTGGGgttttagagctagaaatagcaagttaaaataag
1919	NO04G02730	ccgggtccgattcccggtgcctgcaTGAAGATGAGGAAGACACTGgttttagagctagaaatagcaagttaaaataag
1920	NO04G02740	ccgggtccgattcccggtgcctgcaGGCACCAACCACAATCCTGGgttttagagctagaaatagcaagttaaaataag
1921	NO04G02750	ccgggtccgattcccggtgcctgcaGCTTTGGGACAAGTACAACGgttttagagctagaaatagcaagttaaaataag
1922	NO04G02760	ccgggtccgattcccggtgcctgcaTCAGGCGGCCACTTACTGGGgttttagagctagaaatagcaagttaaaataag
1923	NO04G02770	ccgggtccgattcccggtgcctgcaCATCATTTGAGTCGTCACCGgttttagagctagaaatagcaagttaaaataag
1924	NO04G02780	ccgggtccgattcccggtgcctgcaCTGGTAGGGAGACATGCCTGgttttagagctagaaatagcaagttaaaataag
1925	NO04G02790	ccgggtccgattcccggtgcctgcaGCCACGGTTCATCTCCACGGgttttagagctagaaatagcaagttaaaataag
1926	NO04G02800	ccgggtccgattcccggtgcctgcaGAGAGCTTCTCCCTGCACAAgttttagagctagaaatagcaagttaaaataag
1927	NO04G02810	ccgggtccgattcccggtgcctgcaAGAGACGAACGCTCGCAAGGgttttagagctagaaatagcaagttaaaataag
1928	NO04G02820	ccgggtccgattcccggtgcctgcaTAACCACCTTCTCCACCTCGgttttagagctagaaatagcaagttaaaataag
1929	NO04G02830	ccgggtccgattcccggtgcctgcaTGTGGTTGACAATAGATGAGgttttagagctagaaatagcaagttaaaataag
1930	NO04G02840	ccgggtccgattcccggtgcctgcaTGGAATCTGCTGATGCGATGgttttagagctagaaatagcaagttaaaataag
1931	NO04G02850	ccgggtccgattcccggtgcctgcaCAACGCCGTCGATCACCCGGgttttagagctagaaatagcaagttaaaataag
1932	NO04G02860	ccgggtccgattcccggtgcctgcaTTGACGCACAAGTCTCCCCGgttttagagctagaaatagcaagttaaaataag
1933	NO04G02870	ccgggtccgattcccggtgcctgcaTATCAAGTCGATTATCCGGAgttttagagctagaaatagcaagttaaaataag
1934	NO04G02880	ccgggtccgattcccggtgcctgcaGAAATGCGCAGAGTTGACGGgttttagagctagaaatagcaagttaaaataag
1935	NO04G02890	ccgggtccgattcccggtgcctgcaACTGACCCTAACCTTACTCGgttttagagctagaaatagcaagttaaaataag
1936	NO04G02900	ccgggtccgattcccggtgcctgcaGTCGAGGTTTGGGAGCACGGgttttagagctagaaatagcaagttaaaataag
1937	NO04G02910	ccgggtccgattcccggtgcctgcaCCTCTCCGATACCGGCAGTGgttttagagctagaaatagcaagttaaaataag
1938	NO04G02920	ccgggtccgattcccggtgcctgcaGAAGGCCGAGTACAAGACTGgttttagagctagaaatagcaagttaaaataag
1939	NO04G02930	ccgggtccgattcccggtgcctgcaGGTAGCAGTGGAAATGACGTgttttagagctagaaatagcaagttaaaataag
1940	NO04G02940	ccgggtccgattcccggtgcctgcaTTGTACTCACAGAACTCGGGgttttagagctagaaatagcaagttaaaataag
1941	NO04G02950	ccgggtccgattcccggtgcctgcaGTATACCCCGAATTGCACCTgttttagagctagaaatagcaagttaaaataag
1942	NO04G02970	ccgggtccgattcccggtgcctgcaTGCCGTACTGGACATCAACGgttttagagctagaaatagcaagttaaaataag
1943	NO04G02980	ccgggtccgattcccggtgcctgcaCCGCTACCAAACTCCTGCCAgttttagagctagaaatagcaagttaaaataag
1944	NO04G03000	ccgggtccgattcccggtgcctgcaTCGGCAGCAAGTGCAGACCGgttttagagctagaaatagcaagttaaaataag
1945	NO04G03010	ccgggtccgattcccggtgcctgcaTCCGCATCAGAGACCCACAGgttttagagctagaaatagcaagttaaaataag
1946	NO04G03020	ccgggtccgattcccggtgcctgcaTTGCAGTCGGGAATAAATGGgttttagagctagaaatagcaagttaaaataag
1947	NO04G03040	ccgggtccgattcccggtgcctgcaCGTCATTAATCTTGACCCGGgttttagagctagaaatagcaagttaaaataag
1948	NO04G03050	ccgggtccgattcccggtgcctgcaTGAGGCGCAAAACGTCCACGgttttagagctagaaatagcaagttaaaataag
1949	NO04G03060	ccgggtccgattcccggtgcctgcaGCAGGTCATCATTATTGATGgttttagagctagaaatagcaagttaaaataag
1950	NO04G03070	ccgggtccgattcccggtgcctgcaGTGGAGAATAGGAGGCCCCGgttttagagctagaaatagcaagttaaaataag
1951	NO04G03080	ccgggtccgattcccggtgcctgcaCACTGGCGTCCTACTCACAGgttttagagctagaaatagcaagttaaaataag
1952	NO04G03090	ccgggtccgattcccggtgcctgcaCACAAGCAGCGCTGGCAGTGgttttagagctagaaatagcaagttaaaataag
1953	NO04G03100	ccgggtccgattcccggtgcctgcaCCACTACGAAGACAGTTGTGgttttagagctagaaatagcaagttaaaataag
1954	NO04G03110	ccgggtccgattcccggtgcctgcaGGGCGTGTTGAATCCTTCAGgttttagagctagaaatagcaagttaaaataag
1955	NO04G03120	ccgggtccgattcccggtgcctgcaACAGAACTTGATGCCGCCCGgttttagagctagaaatagcaagttaaaataag
1956	NO04G03130	ccgggtccgattcccggtgcctgcaGCAGCCTTACTACCACCGCGgttttagagctagaaatagcaagttaaaataag
1957	NO04G03140	ccgggtccgattcccggtgcctgcaACATTCCATCTACACCGCCGgttttagagctagaaatagcaagttaaaataag
1958	NO04G03150	ccgggtccgattcccggtgcctgcaCTGGTGGAGAGCAAGTCGTGgttttagagctagaaatagcaagttaaaataag
1959	NO04G03160	ccgggtccgattcccggtgcctgcaGGACGCTCACAAGCACATGGgttttagagctagaaatagcaagttaaaataag
1960	NO04G03170	ccgggtccgattcccggtgcctgcaCCAGATGGGCGACAACAAGGgttttagagctagaaatagcaagttaaaataag
1961	NO04G03180	ccgggtccgattcccggtgcctgcaCTCCAAAAGTTGTTGCGTGGgttttagagctagaaatagcaagttaaaataag
1962	NO04G03190	ccgggtccgattcccggtgcctgcaAAGAGCCGAAGGTGACGCGGgttttagagctagaaatagcaagttaaaataag
1963	NO04G03200	ccgggtccgattcccggtgcctgcaAAAGACGACGCAGTATTCCGgttttagagctagaaatagcaagttaaaataag
1964	NO04G03210	ccgggtccgattcccggtgcctgcaAAGTAACCCCGCTCACAGCAgttttagagctagaaatagcaagttaaaataag
1965	NO04G03220	ccgggtccgattcccggtgcctgcaGATGGTGTGTGATTCCCTGGgttttagagctagaaatagcaagttaaaataag
1966	NO04G03230	ccgggtccgattcccggtgcctgcaACGCATCGGAGATTACCGGGgttttagagctagaaatagcaagttaaaataag
1967	NO04G03240	ccgggtccgattcccggtgcctgcaGGCTATCACGTTGTTCACCAgttttagagctagaaatagcaagttaaaataag
1968	NO04G03250	ccgggtccgattcccggtgcctgcaAAGCCGTTCATGTCCAAGAGgttttagagctagaaatagcaagttaaaataag
1969	NO04G03260	ccgggtccgattcccggtgcctgcaTCCGATGGCGAATATCCCTGgttttagagctagaaatagcaagttaaaataag
1970	NO04G03270	ccgggtccgattcccggtgcctgcaGTTCCCTGGAGGTTGTACGGgttttagagctagaaatagcaagttaaaataag
1971	NO04G03280	ccgggtccgattcccggtgcctgcaCTGCCCACACTACCACTCGGgttttagagctagaaatagcaagttaaaataag
1972	NO04G03290	ccgggtccgattcccggtgcctgcaCTCTCACGATAGTACCCCAGgttttagagctagaaatagcaagttaaaataag
1973	NO04G03300	ccgggtccgattcccggtgcctgcaTCGCTGTATGATGTATCTGGgttttagagctagaaatagcaagttaaaataag
1974	NO04G03310	ccgggtccgattcccggtgcctgcaACGGGCGAATACTCCCTGTGgttttagagctagaaatagcaagttaaaataag
1975	NO04G03320	ccgggtccgattcccggtgcctgcaTCCAGCGTTGATAATTGTGGgttttagagctagaaatagcaagttaaaataag
1976	NO04G03340	ccgggtccgattcccggtgcctgcaGTTCCTGAAAAATATTCTGGgttttagagctagaaatagcaagttaaaataag
1977	NO04G03330	ccgggtccgattcccggtgcctgcaGGGTTTACGATGAAGTGACGgttttagagctagaaatagcaagttaaaataag
1978	NO04G03360	ccgggtccgattcccggtgcctgcaACATCGACGAGGAGGTTCGGgttttagagctagaaatagcaagttaaaataag
1979	NO04G03370	ccgggtccgattcccggtgcctgcaTGAAGCAACACACCACAACGgttttagagctagaaatagcaagttaaaataag
1980	NO04G03380	ccgggtccgattcccggtgcctgcaAGGTGTCCAAGTATATGTTGgttttagagctagaaatagcaagttaaaataag
1981	NO04G03390	ccgggtccgattcccggtgcctgcaACGGTTGCTGGATAAAAGGGgttttagagctagaaatagcaagttaaaataag
1982	NO04G03400	ccgggtccgattcccggtgcctgcaCCGCCAGTAAGCGTAAATGGgttttagagctagaaatagcaagttaaaataag
1983	NO04G03410	ccgggtccgattcccggtgcctgcaTGCTGGTGGCCCAATAACCAgttttagagctagaaatagcaagttaaaataag
1984	NO04G03420	ccgggtccgattcccggtgcctgcaGTCCTGCGATACAGACACGGgttttagagctagaaatagcaagttaaaataag
1985	NO04G03430	ccgggtccgattcccggtgcctgcaCTATGTCGATTACACACCAGgttttagagctagaaatagcaagttaaaataag
1986	NO04G03440	ccgggtccgattcccggtgcctgcaGGTCAGCGCATGTCGAACCAgttttagagctagaaatagcaagttaaaataag
1987	NO04G03450	ccgggtccgattcccggtgcctgcaGATATCTTCAATTACGGCCGgttttagagctagaaatagcaagttaaaataag
1988	NO04G03460	ccgggtccgattcccggtgcctgcaCGTCTTCTGTAACATCATCGgttttagagctagaaatagcaagttaaaataag
1989	NO04G03470	ccgggtccgattcccggtgcctgcaCGTGCCGCACAACCCCAATGgttttagagctagaaatagcaagttaaaataag
1990	NO04G03490	ccgggtccgattcccggtgcctgcaCCTACAATTAGAGAAGTGGGgttttagagctagaaatagcaagttaaaataag
1991	NO04G03500	ccgggtccgattcccggtgcctgcaAGGATCGTGACGTTCGACAAgttttagagctagaaatagcaagttaaaataag
1992	NO04G03510	ccgggtccgattcccggtgcctgcaATCAACCCAATCGAAGCCAGgttttagagctagaaatagcaagttaaaataag
1993	NO04G03520	ccgggtccgattcccggtgcctgcaCGGTCCTTGATGATTCCCAGgttttagagctagaaatagcaagttaaaataag
1994	NO04G03530	ccgggtccgattcccggtgcctgcaAGATGTCGCAGGAGTCGTAGgttttagagctagaaatagcaagttaaaataag
1995	NO04G03540	ccgggtccgattcccggtgcctgcaAACGTGCCACAATGACAGGGgttttagagctagaaatagcaagttaaaataag
1996	NO04G03550	ccgggtccgattcccggtgcctgcaACAATAAAAAGGAATCCCAGgttttagagctagaaatagcaagttaaaataag
1997	NO04G03560	ccgggtccgattcccggtgcctgcaTCATGCCGACGCTAACAAGAgttttagagctagaaatagcaagttaaaataag
1998	NO04G03580	ccgggtccgattcccggtgcctgcaAGACAAGAAAATGATGACCCgttttagagctagaaatagcaagttaaaataag
1999	NO04G03590	ccgggtccgattcccggtgcctgcaTACACTCGATGACGGCACGCgttttagagctagaaatagcaagttaaaataag
[truncated: 7,711 more rows]
