# Supplementary material for: High-throughput Raman-activated cell sorting of microalgal genome-wide edited library revealed a new regulatory pathway for carotenoid synthesis
Source: Research Square preprint supplement (doi:10.21203/rs.3.rs-7026720/v1), 2025-07-29
Supplement: Supplementary file 3 [file 5f4c7ca6637613ed2f05b027.xlsx]

## Sheet: FR1
Gene	logFC	logCPM	LR (Likelihood Ratio)	PValue	FDR	Count
NO01G04570	3.12909	8.10133	32.1163	1.45211e-08	5.77212e-07	26
NO01G04750	7.24724	11.175	214.641	1.33463e-48	3.66538e-46	270
NO02G00890	9.46796	14.5101	177.145	2.03564e-40	3.61746e-38	2728
NO02G03540	16.7741	16.0853	358.149	7.12294e-80	2.15184e-76	8154
NO03G00580	10.746	14.7024	178.318	1.12881e-40	2.13133e-38	3124
NO03G02420	3.63694	5.39155	7.17392	0.00739711	0.0354199	6
NO03G03670	2.06908	16.1712	11.7939	0.000594267	0.00641171	5045
NO03G03790	5.77314	5.84339	30.7529	2.93058e-08	1.10666e-06	10
NO03G04970	5.99221	4.95901	16.1092	5.97931e-05	0.0010502	7
NO04G04860	2.93431	6.78896	9.42175	0.00214427	0.015289	11
NO05G00530	5.38156	2.93765	6.37745	0.011558	0.0489714	3
NO05G02210	11.6476	14.8567	267.406	4.17224e-60	3.15109e-57	3479
NO05G04330	5.44958	14.6279	84.0379	4.85369e-20	6.10959e-18	2781
NO05G05290	6.38373	4.88563	17.0476	3.6454e-05	0.000726306	7
NO09G00270	4.24813	5.44697	12.5382	0.000398712	0.00483739	7
NO09G03530	13.4048	15.3451	95.1781	1.74004e-22	2.3894e-20	4882
NO10G01130	12.2077	15.2391	215.976	6.82735e-49	2.06254e-46	4535
NO10G02210	11.3639	14.9791	169.905	7.75981e-39	1.23381e-36	3786
NO11G02530	10.6475	15.1242	192.146	1.08144e-43	2.51309e-41	4183
NO11G02610	6.46513	11.2226	29.3489	6.04493e-08	2.17402e-06	275
NO13G03080	10.8313	14.8502	255.262	1.85058e-57	9.31768e-55	3461
NO14G00410	10.4186	16.3254	225.626	5.36121e-51	1.79958e-48	9609
NO14G03230	10.1183	14.6042	176.406	2.9526e-40	4.95545e-38	2916
NO15G01920	3.83423	5.30088	7.86311	0.00504536	0.0277128	6
NO17G01820	16.4659	15.1728	353.15	8.73467e-79	1.31937e-75	4334
NO18G00120	2.08911	8.94683	16.3413	5.28987e-05	0.000968527	35
NO18G00500	12.7779	15.2892	182.054	1.72584e-41	3.47584e-39	4696
NO18G01830	14.3328	15.4468	115.463	6.23238e-27	8.96573e-25	5239
NO18G02330	9.32654	15.1526	185.255	3.45198e-42	7.44888e-40	4254
NO20G02380	10.982	16.3477	247.327	9.93704e-56	4.28854e-53	9766
NO20G02530	11.8491	15.2543	245.714	2.23245e-55	8.43029e-53	4582
NO21G00790	13.1289	9.70203	346.081	3.02439e-77	3.04556e-74	102
NO24G00840	8.03775	11.8829	196.338	1.31525e-44	3.31115e-42	442
NO24G02060	6.64855	13.1835	118.929	1.08564e-27	1.63986e-25	1063
NO25G00080	11.3367	15.1837	256.466	1.01111e-57	6.1091e-55	4362
NO25G01640	5.47012	14.8646	82.8408	8.89341e-20	1.07468e-17	3279
NO29G00290	13.1656	14.9791	91.2701	1.25343e-21	1.64635e-19	3789
NO30G00750	4.25842	8.51108	56.8486	4.70685e-14	4.7398e-12	40
NO30G00860	11.1885	15.2923	79.0994	5.90617e-19	6.86252e-17	4702
NO30G00990	4.9095	6.35678	32.4349	1.23254e-08	4.96466e-07	12

## Sheet: FR2
Gene	logFC	logCPM	LR (Likelihood Ratio)	PValue	FDR	Count
NO01G01950	4.74077	10.0234	49.1612	2.35765e-12	1.69763e-10	104
NO01G03490	8.26777	12.739	262.4	5.14412e-59	1.11076e-56	732
NO01G03610	7.20388	12.7363	222.361	2.76284e-50	4.91298e-48	723
NO01G04570	11.0689	15.6107	334.61	9.52282e-75	7.19687e-72	5375
NO01G04860	9.99526	14.5947	322.07	5.12751e-72	2.58341e-69	2656
NO01G05740	2.54392	7.08538	12.1597	0.000488336	0.0071316	11
NO02G03540	6.83678	4.92288	22.3228	2.30457e-06	6.45068e-05	7
NO02G05350	10.1043	14.6877	311.955	8.19255e-70	3.53801e-67	2833
NO03G00410	9.70849	13.7897	174.882	6.35187e-40	8.72805e-38	1521
NO03G01130	6.69082	15.5038	168.42	1.63797e-38	2.15287e-36	4857
NO03G02420	4.10685	5.61539	10.9574	0.000932321	0.01114	7
NO03G03670	1.9735	15.993	13.4073	0.000250643	0.00410424	3975
NO03G03790	6.28617	6.29254	49.0251	2.52708e-12	1.7766e-10	12
NO03G04970	5.4325	3.70652	7.97207	0.00475047	0.0323362	4
NO04G04710	13.7911	15.7948	188.851	5.66455e-43	8.15426e-41	6113
NO05G01370	10.6443	16.1721	303.943	4.55763e-68	1.37777e-65	7926
NO05G03640	9.32249	14.9575	216.696	4.75535e-49	7.98635e-47	3408
NO07G01830	4.20412	5.57831	8.98891	0.00271623	0.0230651	7
NO08G02900	16.3963	15.3911	362.032	1.01649e-80	1.02429e-77	4623
NO09G00230	17.3923	15.3989	297.525	1.14015e-66	3.13335e-64	4648
NO10G01170	11.2115	15.4887	325.307	1.01166e-72	6.11648e-70	4940
NO11G00900	10.2457	15.4852	306.992	9.87323e-69	3.73085e-66	4922
NO11G02530	12.3502	16.7027	256.598	9.46565e-58	1.90764e-55	11462
NO12G01940	3.27017	6.77572	18.5939	1.61736e-05	0.000395458	11
NO13G00730	13.6914	14.7759	204.318	2.3856e-46	3.60584e-44	3019
NO14G00410	2.0806	8.57243	14.4176	0.000146429	0.00266659	25
NO16G02450	6.76733	11.7035	215.93	6.98704e-49	1.11167e-46	353
NO17G00760	11.9549	13.8705	58.3843	2.15599e-14	2.17252e-12	1613
NO17G02590	11.1829	6.75977	130.515	3.16208e-30	3.82359e-28	16
NO18G00500	4.28891	6.44881	20.577	5.72788e-06	0.000153234	11
NO18G01830	5.39341	5.7918	17.1232	3.5032e-05	0.000802285	9
NO19G00460	1.72828	7.87735	7.05839	0.00788949	0.0456895	14
NO21G01630	11.8557	16.5653	164.922	9.51582e-38	1.1986e-35	10419
NO24G00380	6.84801	3.1035	10.7381	0.00104955	0.0120638	4
NO24G00840	10.8991	14.6186	290.278	4.325e-65	1.08954e-62	2704
NO28G01410	6.25314	7.79769	32.928	9.56341e-09	4.2515e-07	27
NO29G00660	9.45618	14.6522	277.195	3.0685e-62	7.13544e-60	2760
NO29G01410	17.7149	15.5124	471.361	1.62029e-104	4.89812e-101	5028
NO29G01730	6.10899	5.38854	15.235	9.4928e-05	0.00192596	8
NO30G00120	10.611	15.6174	240.084	3.76987e-54	7.1227e-52	5397
NO30G00750	13.6197	17.6533	305.794	1.80104e-68	6.04951e-66	22156
NO30G00860	11.6185	15.5988	83.4487	6.53905e-20	7.6029e-18	5333
NO30G00920	2.69357	6.48643	8.65628	0.00325937	0.0259291	8
NO30G00990	10.5937	12.2279	366.11	1.31564e-81	1.98859e-78	519

## Sheet: FR3
Gene	logFC	logCPM	LR (Likelihood Ratio)	PValue	FDR	Count
NO01G00570	7.57622	14.6355	139.5	3.42412e-32	4.49602e-30	3206
NO01G00920	10.6076	14.5559	61.464	4.50924e-15	3.32144e-13	3076
NO01G03010	10.2719	12.254	69.1895	8.94409e-17	7.1082e-15	627
NO01G04570	9.99943	14.6702	199.938	2.15511e-45	1.62711e-42	3326
NO01G04600	6.16414	11.3895	133.371	7.50079e-31	8.97017e-29	333
NO01G05340	9.6961	13.6737	144.395	2.91189e-33	4.39695e-31	1668
NO01G05740	9.66505	13.9283	195.848	1.68259e-44	1.01628e-41	1989
NO02G01450	9.15939	13.3997	144.94	2.21346e-33	3.51823e-31	1378
NO02G03540	16.3825	15.6977	291.634	2.19071e-65	6.61595e-62	6795
NO02G04730	9.05123	13.5761	172.534	2.06919e-39	6.24896e-37	1556
NO03G00410	11.1886	15.3971	149.132	2.68379e-34	4.50281e-32	5511
NO03G02420	3.50842	5.33254	6.52816	0.010618	0.042755	6
NO03G02950	11.2292	13.9649	208.821	2.48359e-47	2.50014e-44	2045
NO03G03060	8.77393	14.236	173.956	1.0119e-39	3.39549e-37	2453
NO03G03670	2.25481	16.2866	11.6246	0.000650863	0.00608547	6273
NO03G03790	13.5688	14.2092	274.018	1.51098e-61	2.28158e-58	2424
NO04G00860	9.83019	12.9697	29.6039	5.29982e-08	1.5847e-06	1026
NO05G01530	3.55442	7.26361	31.1948	2.33386e-08	7.9194e-07	18
NO05G02210	3.33999	6.65354	17.5403	2.81275e-05	0.00048819	12
NO05G03640	8.60159	14.3678	139.859	2.85774e-32	3.9229e-30	2685
NO05G04360	8.38387	12.1404	112.523	2.74508e-26	2.85867e-24	576
NO06G00570	4.93792	15.049	57.3507	3.64629e-14	2.62186e-12	3949
NO07G01800	9.39133	14.1668	164.521	1.16414e-37	2.88001e-35	2344
NO07G02270	6.33437	15.3147	88.9992	3.94969e-21	3.50825e-19	5025
NO07G02970	9.688	12.6204	113.544	1.63992e-26	1.76878e-24	806
NO07G04130	5.22733	5.32646	16.1254	5.92836e-05	0.000914266	8
NO08G02900	6.1577	3.86707	10.3287	0.0013098	0.00976692	5
NO09G00390	2.5501	10.2297	21.9741	2.76352e-06	6.0477e-05	103
NO09G01690	6.38811	6.04233	36.8807	1.25582e-09	5.03933e-08	12
NO09G04150	10.8025	12.8876	68.4699	1.28828e-16	9.97588e-15	971
NO10G01570	9.24809	16.3351	158.568	2.32535e-36	4.13092e-34	10516
NO10G02600	11.1526	14.2286	188.333	7.34868e-43	2.77413e-40	2454
NO12G00510	9.05165	14.246	129.771	4.59978e-30	5.14494e-28	2473
NO12G02960	9.76186	13.8279	159.844	1.22411e-36	2.46453e-34	1856
NO14G00410	8.41464	14.3334	158.708	2.16726e-36	4.09071e-34	2619
NO14G01580	12.8886	14.5088	133.93	5.66071e-31	7.12306e-29	2982
NO15G00940	8.2392	12.1593	163.854	1.6283e-37	3.51247e-35	583
NO16G01850	11.4224	13.7834	72.9656	1.3193e-17	1.07683e-15	1804
NO16G01970	8.40356	13.7914	164.396	1.23974e-37	2.88001e-35	1800
NO16G02450	9.35818	14.4041	189.883	3.37219e-43	1.45486e-40	2762
NO16G02910	10.9338	9.70696	111.342	4.98064e-26	5.01385e-24	111
NO18G00500	3.45317	5.89553	9.60468	0.00194082	0.0127143	8
NO20G00910	2.64664	15.2793	17.2817	3.22278e-05	0.000549876	3437
NO20G01290	5.56674	12.4083	102.74	3.82154e-24	3.49729e-22	657
NO21G01580	10.4215	13.6699	194.235	3.78428e-44	1.90476e-41	1666
NO22G00690	8.11508	14.4016	139.974	2.69714e-32	3.87874e-30	2740
NO24G00470	4.37632	14.3303	52.8226	3.65071e-13	2.50571e-11	2303
NO24G02490	11.1021	13.4974	84.8106	3.28359e-20	2.75457e-18	1480
NO25G01820	6.50826	13.5821	103.172	3.07209e-24	2.89929e-22	1521
NO27G00220	8.38914	14.5782	133.313	7.72266e-31	8.97017e-29	3102
NO27G00950	11.9903	15.6943	87.454	8.62647e-21	7.44341e-19	6774
NO27G01750	10.1327	13.0242	39.8679	2.71728e-10	1.13975e-08	1066
NO28G01410	10.4161	12.256	62.9886	2.07901e-15	1.56966e-13	628
NO30G00120	6.26249	11.433	108.206	2.4222e-25	2.3597e-23	344
NO30G00750	10.2255	14.388	170.004	7.38298e-39	2.02696e-36	2737
NO30G00990	5.28392	6.82669	53.4671	2.6296e-13	1.84683e-11	17

## Sheet: All
KO	Gene	logFC	logCPM	LR (Likelihood Ratio)	PValue	FDR	Count	Replicate	Shared	Pathway / function
NA	NO01G04570	3.12909	8.10133	32.1163	1.45211e-08	5.77212e-07	26	FR1	TRUE	NA
K00006	NO01G04750	7.24724	11.175	214.641	1.33463e-48	3.66538e-46	270	FR1	FALSE	ko00564 Glycerophospholipid metabolism
K01090	NO02G00890	9.46796	14.5101	177.145	2.03564e-40	3.61746e-38	2728	FR1	FALSE	NA
K11878	NO02G03540	16.7741	16.0853	358.149	7.12294e-80	2.15184e-76	8154	FR1	TRUE	ko03050 Proteasome
K12812	NO03G00580	10.746	14.7024	178.318	1.12881e-40	2.13133e-38	3124	FR1	FALSE	ko03015 mRNA surveillance pathway
NA	NO03G02420	3.63694	5.39155	7.17392	0.00739711	0.0354199	6	FR1	TRUE	NA
K04773	NO03G03670	2.06908	16.1712	11.7939	0.000594267	0.00641171	5045	FR1	TRUE	NA
NA	NO03G03790	5.77314	5.84339	30.7529	2.93058e-08	1.10666e-06	10	FR1	TRUE	NA
NA	NO03G04970	5.99221	4.95901	16.1092	5.97931e-05	0.0010502	7	FR1	TRUE	NA
K01188	NO04G04860	2.93431	6.78896	9.42175	0.00214427	0.015289	11	FR1	FALSE	ko00500 Starch and sucrose metabolism
K03977	NO05G00530	5.38156	2.93765	6.37745	0.011558	0.0489714	3	FR1	FALSE	NA
NA	NO05G02210	11.6476	14.8567	267.406	4.17224e-60	3.15109e-57	3479	FR1	TRUE	NA
NA	NO05G04330	5.44958	14.6279	84.0379	4.85369e-20	6.10959e-18	2781	FR1	FALSE	NA
NA	NO05G05290	6.38373	4.88563	17.0476	3.6454e-05	0.000726306	7	FR1	FALSE	NA
NA	NO09G00270	4.24813	5.44697	12.5382	0.000398712	0.00483739	7	FR1	FALSE	NA
K01438	NO09G03530	13.4048	15.3451	95.1781	1.74004e-22	2.3894e-20	4882	FR1	FALSE	ko00220 Arginine biosynthesis
K15111	NO10G01130	12.2077	15.2391	215.976	6.82735e-49	2.06254e-46	4535	FR1	FALSE	NA
K17085	NO10G02210	11.3639	14.9791	169.905	7.75981e-39	1.23381e-36	3786	FR1	FALSE	NA
NA	NO11G02530	10.6475	15.1242	192.146	1.08144e-43	2.51309e-41	4183	FR1	TRUE	NA
K06640	NO11G02610	6.46513	11.2226	29.3489	6.04493e-08	2.17402e-06	275	FR1	FALSE	ko04110 Cell cycle
K03241	NO13G03080	10.8313	14.8502	255.262	1.85058e-57	9.31768e-55	3461	FR1	FALSE	Translational initiation
NA	NO14G00410	10.4186	16.3254	225.626	5.36121e-51	1.79958e-48	9609	FR1	TRUE	NA
K11252	NO14G03230	10.1183	14.6042	176.406	2.9526e-40	4.95545e-38	2916	FR1	FALSE	Histone H2B
NA	NO15G01920	3.83423	5.30088	7.86311	0.00504536	0.0277128	6	FR1	FALSE	NA
NA	NO17G01820	16.4659	15.1728	353.15	8.73467e-79	1.31937e-75	4334	FR1	FALSE	NA
NA	NO18G00120	2.08911	8.94683	16.3413	5.28987e-05	0.000968527	35	FR1	FALSE	NA
NA	NO18G00500	12.7779	15.2892	182.054	1.72584e-41	3.47584e-39	4696	FR1	TRUE	NA
NA	NO18G01830	14.3328	15.4468	115.463	6.23238e-27	8.96573e-25	5239	FR1	TRUE	NA
NA	NO18G02330	9.32654	15.1526	185.255	3.45198e-42	7.44888e-40	4254	FR1	FALSE	NA
NA	NO20G02380	10.982	16.3477	247.327	9.93704e-56	4.28854e-53	9766	FR1	FALSE	NA
K15283	NO20G02530	11.8491	15.2543	245.714	2.23245e-55	8.43029e-53	4582	FR1	FALSE	NA
NA	NO21G00790	13.1289	9.70203	346.081	3.02439e-77	3.04556e-74	102	FR1	FALSE	NA
K09839	NO24G00840	8.03775	11.8829	196.338	1.31525e-44	3.31115e-42	442	FR1	TRUE	ko00906 Carotenoid biosynthesis
NA	NO24G02060	6.64855	13.1835	118.929	1.08564e-27	1.63986e-25	1063	FR1	FALSE	NA
NA	NO25G00080	11.3367	15.1837	256.466	1.01111e-57	6.1091e-55	4362	FR1	FALSE	NA
NA	NO25G01640	5.47012	14.8646	82.8408	8.89341e-20	1.07468e-17	3279	FR1	FALSE	NA
K08735	NO29G00290	13.1656	14.9791	91.2701	1.25343e-21	1.64635e-19	3789	FR1	FALSE	ko03430 Mismatch repair
NA	NO30G00750	4.25842	8.51108	56.8486	4.70685e-14	4.7398e-12	40	FR1	TRUE	NA
K17893	NO30G00860	11.1885	15.2923	79.0994	5.90617e-19	6.86252e-17	4702	FR1	TRUE	NA
NA	NO30G00990	4.9095	6.35678	32.4349	1.23254e-08	4.96466e-07	12	FR1	TRUE	NA
NA	NO01G01950	4.74077	10.0234	49.1612	2.35765e-12	1.69763e-10	104	FR2	FALSE	NA
K08576	NO01G03490	8.26777	12.739	262.4	5.14412e-59	1.11076e-56	732	FR2	FALSE	NA
NA	NO01G03610	7.20388	12.7363	222.361	2.76284e-50	4.91298e-48	723	FR2	FALSE	NA
NA	NO01G04570	11.0689	15.6107	334.61	9.52282e-75	7.19687e-72	5375	FR2	TRUE	NA
NA	NO01G04860	9.99526	14.5947	322.07	5.12751e-72	2.58341e-69	2656	FR2	FALSE	NA
K11996	NO01G05740	2.54392	7.08538	12.1597	0.000488336	0.0071316	11	FR2	TRUE	ko04122 Sulfur relay system
K11878	NO02G03540	6.83678	4.92288	22.3228	2.30457e-06	6.45068e-05	7	FR2	TRUE	ko03050 Proteasome
K03834	NO02G05350	10.1043	14.6877	311.955	8.19255e-70	3.53801e-67	2833	FR2	FALSE	NA
K09839	NO03G00410	9.70849	13.7897	174.882	6.35187e-40	8.72805e-38	1521	FR2	TRUE	ko00906 Carotenoid biosynthesis
NA	NO03G01130	6.69082	15.5038	168.42	1.63797e-38	2.15287e-36	4857	FR2	FALSE	NA
NA	NO03G02420	4.10685	5.61539	10.9574	0.000932321	0.0111399	7	FR2	TRUE	NA
K04773	NO03G03670	1.9735	15.993	13.4073	0.000250643	0.00410424	3975	FR2	TRUE	NA
NA	NO03G03790	6.28617	6.29254	49.0251	2.52708e-12	1.7766e-10	12	FR2	TRUE	NA
NA	NO03G04970	5.4325	3.70652	7.97207	0.00475047	0.0323362	4	FR2	TRUE	NA
K01368	NO04G04710	13.7911	15.7948	188.851	5.66455e-43	8.15426e-41	6113	FR2	FALSE	ko04142 Lysosome
NA	NO05G01370	10.6443	16.1721	303.943	4.55763e-68	1.37777e-65	7926	FR2	FALSE	NA
K16466	NO05G03640	9.32249	14.9575	216.696	4.75535e-49	7.98635e-47	3408	FR2	TRUE	NA
K11434	NO07G01830	4.20412	5.57831	8.98891	0.00271623	0.0230651	7	FR2	FALSE	ko04068 FoxO signaling pathway
NA	NO08G02900	16.3963	15.3911	362.032	1.01649e-80	1.02429e-77	4623	FR2	TRUE	NA
K11253	NO09G00230	17.3923	15.3989	297.525	1.14015e-66	3.13335e-64	4648	FR2	FALSE	Histone H3
K00993	NO10G01170	11.2115	15.4887	325.307	1.01166e-72	6.11648e-70	4940	FR2	FALSE	ko00564 Glycerophospholipid metabolism
NA	NO11G00900	10.2457	15.4852	306.992	9.87323e-69	3.73085e-66	4922	FR2	FALSE	NA
NA	NO11G02530	12.3502	16.7027	256.598	9.46565e-58	1.90764e-55	11462	FR2	TRUE	NA
K07444	NO12G01940	3.27017	6.77572	18.5939	1.61736e-05	0.000395458	11	FR2	FALSE	NA
K11368	NO13G00730	13.6914	14.7759	204.318	2.3856e-46	3.60584e-44	3019	FR2	FALSE	NA
NA	NO14G00410	2.0806	8.57243	14.4176	0.000146429	0.00266659	25	FR2	TRUE	NA
K00592	NO16G02450	6.76733	11.7035	215.93	6.98704e-49	1.11167e-46	353	FR2	TRUE	NA
K06641	NO17G00760	11.9549	13.8705	58.3843	2.15599e-14	2.17252e-12	1613	FR2	FALSE	ko04110 Cell cycle
K03321	NO17G02590	11.1829	6.75977	130.515	3.16208e-30	3.82359e-28	16	FR2	FALSE	NA
NA	NO18G00500	4.28891	6.44881	20.577	5.72788e-06	0.000153234	11	FR2	TRUE	NA
NA	NO18G01830	5.39341	5.7918	17.1232	3.5032e-05	0.000802285	9	FR2	TRUE	NA
NA	NO19G00460	1.72828	7.87735	7.05839	0.00788949	0.0456895	14	FR2	FALSE	NA
NA	NO21G01630	11.8557	16.5653	164.922	9.51582e-38	1.1986e-35	10419	FR2	FALSE	NA
K06961	NO24G00380	6.84801	3.1035	10.7381	0.00104955	0.0120638	4	FR2	FALSE	NA
K09839	NO24G00840	10.8991	14.6186	290.278	4.325e-65	1.08954e-62	2704	FR2	TRUE	ko00906 Carotenoid biosynthesis
NA	NO28G01410	6.25314	7.79769	32.928	9.56341e-09	4.2515e-07	27	FR2	TRUE	NA
NA	NO29G00660	9.45618	14.6522	277.195	3.0685e-62	7.13544e-60	2760	FR2	FALSE	NA
NA	NO29G01410	17.7149	15.5124	471.361	1.62029e-104	4.89812e-101	5028	FR2	FALSE	NA
K08907	NO29G01730	6.10899	5.38854	15.235	9.4928e-05	0.00192596	8	FR2	FALSE	ko00196 Photosynthesis - antenna protein
NA	NO30G00120	10.611	15.6174	240.084	3.76987e-54	7.1227e-52	5397	FR2	TRUE	NA
NA	NO30G00750	13.6197	17.6533	305.794	1.80104e-68	6.04951e-66	22156	FR2	TRUE	NA
K17893	NO30G00860	11.6185	15.5988	83.4487	6.53905e-20	7.6029e-18	5333	FR2	TRUE	NA
NA	NO30G00920	2.69357	6.48643	8.65628	0.00325937	0.0259291	8	FR2	FALSE	NA
NA	NO30G00990	10.5937	12.2279	366.11	1.31564e-81	1.98859e-78	519	FR2	TRUE	NA
K07117	NO01G00570	7.57622	14.6355	139.5	3.42412e-32	4.49602e-30	3206	FR3	FALSE	NA
NA	NO01G00920	10.6076	14.5559	61.464	4.50924e-15	3.32144e-13	3076	FR3	FALSE	NA
K06698	NO01G03010	10.2719	12.254	69.1895	8.94409e-17	7.1082e-15	627	FR3	FALSE	ko03050 Proteasome
NA	NO01G04570	9.99943	14.6702	199.938	2.15511e-45	1.62711e-42	3326	FR3	TRUE	NA
NA	NO01G04600	6.16414	11.3895	133.371	7.50079e-31	8.97017e-29	333	FR3	FALSE	NA
NA	NO01G05340	9.6961	13.6737	144.395	2.91189e-33	4.39695e-31	1668	FR3	FALSE	NA
K11996	NO01G05740	9.66505	13.9283	195.848	1.68259e-44	1.01628e-41	1989	FR3	TRUE	ko04122 Sulfur relay system
NA	NO02G01450	9.15939	13.3997	144.94	2.21346e-33	3.51823e-31	1378	FR3	FALSE	NA
K11878	NO02G03540	16.3825	15.6977	291.634	2.19071e-65	6.61595e-62	6795	FR3	TRUE	ko03050 Proteasome
NA	NO02G04730	9.05123	13.5761	172.534	2.06919e-39	6.24896e-37	1556	FR3	FALSE	NA
K09839	NO03G00410	11.1886	15.3971	149.132	2.68379e-34	4.50281e-32	5511	FR3	TRUE	ko00906 Carotenoid biosynthesis
NA	NO03G02420	3.50842	5.33254	6.52816	0.010618	0.042755	6	FR3	TRUE	NA
NA	NO03G02950	11.2292	13.9649	208.821	2.48359e-47	2.50014e-44	2045	FR3	FALSE	NA
K01487	NO03G03060	8.77393	14.236	173.956	1.0119e-39	3.39549e-37	2453	FR3	FALSE	ko00230 Purine metabolism
K04773	NO03G03670	2.25481	16.2866	11.6246	0.000650863	0.00608547	6273	FR3	TRUE	NA
NA	NO03G03790	13.5688	14.2092	274.018	1.51098e-61	2.28158e-58	2424	FR3	TRUE	NA
NA	NO04G00860	9.83019	12.9697	29.6039	5.29982e-08	1.5847e-06	1026	FR3	FALSE	NA
K06177	NO05G01530	3.55442	7.26361	31.1948	2.33386e-08	7.9194e-07	18	FR3	FALSE	NA
NA	NO05G02210	3.33999	6.65354	17.5403	2.81275e-05	0.00048819	12	FR3	TRUE	NA
K16466	NO05G03640	8.60159	14.3678	139.859	2.85774e-32	3.9229e-30	2685	FR3	TRUE	NA
NA	NO05G04360	8.38387	12.1404	112.523	2.74508e-26	2.85867e-24	576	FR3	FALSE	NA
NA	NO06G00570	4.93792	15.049	57.3507	3.64629e-14	2.62186e-12	3949	FR3	FALSE	NA
NA	NO07G01800	9.39133	14.1668	164.521	1.16414e-37	2.88001e-35	2344	FR3	FALSE	NA
NA	NO07G02270	6.33437	15.3147	88.9992	3.94969e-21	3.50825e-19	5025	FR3	FALSE	NA
K02961	NO07G02970	9.688	12.6204	113.544	1.63992e-26	1.76878e-24	806	FR3	FALSE	ko03010 Ribosome
NA	NO07G04130	5.22733	5.32646	16.1254	5.92836e-05	0.000914266	8	FR3	FALSE	NA
NA	NO08G02900	6.1577	3.86707	10.3287	0.0013098	0.00976692	5	FR3	TRUE	NA
K17917	NO09G00390	2.5501	10.2297	21.9741	2.76352e-06	6.0477e-05	103	FR3	FALSE	ko04144 Endocytosis
NA	NO09G01690	6.38811	6.04233	36.8807	1.25582e-09	5.03933e-08	12	FR3	FALSE	NA
NA	NO09G04150	10.8025	12.8876	68.4699	1.28828e-16	9.97588e-15	971	FR3	FALSE	NA
K13937	NO10G01570	9.24809	16.3351	158.568	2.32535e-36	4.13092e-34	10516	FR3	FALSE	ko00030 Pentose phosphate pathway
K00768	NO10G02600	11.1526	14.2286	188.333	7.34868e-43	2.77413e-40	2454	FR3	FALSE	ko00860 Porphyrin metabolism
K10901	NO12G00510	9.05165	14.246	129.771	4.59978e-30	5.14494e-28	2473	FR3	FALSE	ko03440 Homologous recombination
NA	NO12G02960	9.76186	13.8279	159.844	1.22411e-36	2.46453e-34	1856	FR3	FALSE	NA
NA	NO14G00410	8.41464	14.3334	158.708	2.16726e-36	4.09071e-34	2619	FR3	TRUE	NA
NA	NO14G01580	12.8886	14.5088	133.93	5.66071e-31	7.12306e-29	2982	FR3	FALSE	NA
K01866	NO15G00940	8.2392	12.1593	163.854	1.6283e-37	3.51247e-35	583	FR3	FALSE	ko00970 Aminoacyl-tRNA biosynthesis
NA	NO16G01850	11.4224	13.7834	72.9656	1.3193e-17	1.07683e-15	1804	FR3	FALSE	NA
K02293	NO16G01970	8.40356	13.7914	164.396	1.23974e-37	2.88001e-35	1800	FR3	FALSE	ko00906 Carotenoid biosynthesis
K00592	NO16G02450	9.35818	14.4041	189.883	3.37219e-43	1.45486e-40	2762	FR3	TRUE	NA
K07151	NO16G02910	10.9338	9.70696	111.342	4.98064e-26	5.01385e-24	111	FR3	FALSE	ko00510 N-Glycan biosynthesis
NA	NO18G00500	3.45317	5.89553	9.60468	0.00194082	0.0127143	8	FR3	TRUE	NA
NA	NO20G00910	2.64664	15.2793	17.2817	3.22278e-05	0.000549876	3437	FR3	FALSE	NA
NA	NO20G01290	5.56674	12.4083	102.74	3.82154e-24	3.49729e-22	657	FR3	FALSE	NA
K01194	NO21G01580	10.4215	13.6699	194.235	3.78428e-44	1.90476e-41	1666	FR3	FALSE	ko00500 Starch and sucrose metabolism
NA	NO22G00690	8.11508	14.4016	139.974	2.69714e-32	3.87874e-30	2740	FR3	FALSE	NA
K15275	NO24G00470	4.37632	14.3303	52.8226	3.65071e-13	2.50571e-11	2303	FR3	FALSE	NA
NA	NO24G02490	11.1021	13.4974	84.8106	3.28359e-20	2.75457e-18	1480	FR3	FALSE	NA
K06199	NO25G01820	6.50826	13.5821	103.172	3.07209e-24	2.89929e-22	1521	FR3	FALSE	NA
K00771	NO27G00220	8.38914	14.5782	133.313	7.72266e-31	8.97017e-29	3102	FR3	FALSE	ko00532 Glycosaminoglycan biosynthesis
K02183	NO27G00950	11.9903	15.6943	87.454	8.62647e-21	7.44341e-19	6774	FR3	FALSE	Calmodulin
K17619	NO27G01750	10.1327	13.0242	39.8679	2.71728e-10	1.13975e-08	1066	FR3	FALSE	NA
NA	NO28G01410	10.4161	12.256	62.9886	2.07901e-15	1.56966e-13	628	FR3	TRUE	NA
NA	NO30G00120	6.26249	11.433	108.206	2.4222e-25	2.3597e-23	344	FR3	TRUE	NA
NA	NO30G00750	10.2255	14.388	170.004	7.38298e-39	2.02696e-36	2737	FR3	TRUE	NA
NA	NO30G00990	5.28392	6.82669	53.4671	2.6296e-13	1.84683e-11	17	FR3	TRUE	NA
