# Supplementary material for: High-throughput Raman-activated cell sorting of microalgal genome-wide edited library revealed a new regulatory pathway for carotenoid synthesis
Source: Research Square preprint supplement (doi:10.21203/rs.3.rs-7026720/v1), 2025-07-29
Supplement: Supplementary file 4 [file 7e8394edf7430e7995105456.docx]

**Supplemental tables**

**Table S1. The sequences used in this study.**

| **Name** | **Sequence (5’-3’)** |
| --- | --- |
| GlycinetRNA | GCAGGCATAGTTTAGTGGTAGAATTGGTCGTTGCCATCGACCAGGCCCGGGTCCGATTCCCGGTGCCTGCA |
| **The primers used for gRNA pool amplification** | |
| **gRNA PF** | GGTAGAATTGGTCGTTGCCATCGACCAGGCCCGGGTCCGATTCCCGGTGCCTGCA |
| **gRNA PR** | CTTTTTCAAGTTGATAACGGACTAGCCTTATTTTAACTTGCT  ATTTCTAGCTCTAAAAC |
| **The primers used for plasmid library gRNA amplification** | |
| **Plasmid PF** | CCCTCCATCCACAGAATCGA |
| **Plasmid PR** | CGAGGAGGCTGGGACCAT |
| **The primers used for mutant library gRNA amplification** | |
| **178libgRNAF-1** | AATTCTAGTACGCCCTCCATCCACAGAATCGA |
| **178libgRNAF-2** | AATTTTCTGCCTCCCTCCATCCACAGAATCGA |
| **178libgRNAF-3** | AATTGCTCAGGACCCTCCATCCACAGAATCGA |
| **178libgRNAF-4** | AATTAGGAGTCCCCCTCCATCCACAGAATCGA |
| **178libgRNAF-5** | AATTCATGCCTACCCTCCATCCACAGAATCGA |
| **178libgRNAF-6** | AATTGTAGAGAGCCCTCCATCCACAGAATCGA |
| **178libgRNAF-7** | AATTCCTCTCTGCCCTCCATCCACAGAATCGA |
| **178libgRNAF-8** | AATTAGCGTAGCCCCTCCATCCACAGAATCGA |
| **178libgRNAF-9** | AATTCAGCCTCGCCCTCCATCCACAGAATCGA |
| **178libgRNAF-10** | AATTTGCCTCTTCCCTCCATCCACAGAATCGA |
| **178libgRNAF-11** | AATTTCCTCTACCCCTCCATCCACAGAATCGA |
| **178libgRNAF-12** | AATTTCATGAGCCCCTCCATCCACAGAATCGA |
| **178libgRNAF-13** | AATTCCTGAGATCCCTCCATCCACAGAATCGA |
| **178libgRNAF-14** | AATTTAGCGAGTCCCTCCATCCACAGAATCGA |
| **178libgRNAF-15** | AATTGTAGCTCCCCCTCCATCCACAGAATCGA |
| **178libgRNAF-16** | AATTTACTACGCCCCTCCATCCACAGAATCGA |
| **178libgRNAF-17** | AATTAGGCTCCGCCCTCCATCCACAGAATCGA |
| **178libgRNAF-18** | AATTGCAGCGTACCCTCCATCCACAGAATCGA |
| **178libgRNAF-19** | AATTCTGCGCATCCCTCCATCCACAGAATCGA |
| **178libgRNAF-20** | AATTGAGCGCTACCCTCCATCCACAGAATCGA |
| **178libgRNAF-21** | AATTCGCTCAGTCCCTCCATCCACAGAATCGA |
| **178libgRNAF-22** | AATTGTCTTAGGCCCTCCATCCACAGAATCGA |
| **178libgRNAF-23** | AATTACTGATCGCCCTCCATCCACAGAATCGA |
| **178libgRNAF-24** | AATTTAGCTGCACCCTCCATCCACAGAATCGA |
| **178libgRNAR-1** | GGCCGGTAGCCGAGGAGGCTGGGACCAT |
| **178libgRNAR-2** | GGCCGACGACCGAGGAGGCTGGGACCAT |
| **The primers used for DNA amplification** | |
| **MDA-F1** | AATACCTGGCTCACTTCC |
| **MDA-F2** | CCAATCATCTCCCATCAATAAT |
| **MDA-F3** | GTCACACCGTCGATGACCAG |
| **The primers used for the CRISPR/Cas plasmid construction targeting five *noVDE*s** | |
| **VDE5DF1** | ATTCCCGGTGCCTGCATCTCGGCCTCCTACTCCATGGTTTTAGAGCTAGAAATAGCAAG |
| **VDE5DR1** | CCACTTGCTTGTCGTCGTGCTGCAGGCACCGGGAAT |
| **VDE5DF2** | GCACGACGACAAGCAAGTGGGTTTTAGAGCTAGAAATAGCAAG |
| **VDE5DR2** | TCGTTCAGAAAACCCCCTCTTGCAGGCACCGGGAAT |
| **VDE5DF3** | AGAGGGGGTTTTCTGAACGAGTTTTAGAGCTAGAAATAGCAAG |
| **VDE5DR3** | CAGTTTTGGTCAAGGCGAGATGCAGGCACCGGGAAT |
| **VDE5DF4** | TCTCGCCTTGACCAAAACTGGTTTTAGAGCTAGAAATAGCAAG |
| **VDE5DR4** | CTATTTCTAGCTCTAAAACCTTGGTGACATGTTGTCTGCTGCAGGCACCGGGAAT |

**Table S2. Sources of the *N. oceanica* IMET1 transcriptomes used in this study.**

| **Transcriptome data** | **Culture conditions** | **NanDeSyn data (https://nandesyn.single-cell.cn/chado/analysis-expression)** | **References** |
| --- | --- | --- | --- |
| VLC and HC | VLC: 100 ppm CO2  HC: 5% CO2 | https://nandesyn.single-cell.cn/profiling/PRJNA241382 | Wei et al., 201973 |
| N- and N+ | N-: 0 mg L–1 NaNO3  N+: 1,000 mg L–1 NaNO3 | https://nandesyn.single-cell.cn/profiling/PRJNA182180 | Li et al., 201463 |
| Red or blue light | Red light: 650 nm  Blue light: 420 nm | https://nandesyn.single-cell.cn/profiling/PXD016054 | This work |
