# Supplementary material for: High-throughput Raman-activated cell sorting of microalgal genome-wide edited library revealed a new regulatory pathway for carotenoid synthesis
Source: Research Square preprint supplement (doi:10.21203/rs.3.rs-7026720/v1), 2025-07-29
Supplement: Supplementary file 5 [file b273bbaeae8a26e52e80c9a3.xlsx]

## Sheet: nopac4-1 vs WT
Gene	logFC	logCPM	PValue	FDR	nopac4-1_REP1	nopac4-1_REP2	WT_REP1	WT_REP2	Gene description
NO01G05920	-1.12561	4.3987	3.19982e-07	6.18435e-05	6.81839	7.21977	13.7968	15.6406	Unknown protein
NO02G03830	-1.07786	3.16279	4.07673e-06	0.000483607	13.5822	13.3045	29.4912	24.8293	Unknown protein
NO03G00260	1.1005	2.97094	4.68174e-06	0.000539247	11.831	11.0203	5.02744	5.27656	Unknown protein
NO03G04330	1.66958	8.56071	1.41122e-09	5.39649e-07	636.662	548.001	151.594	204.604	Iduronate 2-sulfatase
NO03G05340	-1.09749	5.25324	1.06707e-07	2.4881e-05	20.0019	16.7706	37.1834	38.8284	Beta--endoglucanase
NO03G05480	-2.67734	0.461889	7.45087e-07	0.000124965	0.101706	0.230224	0.896945	1.22516	Unknown protein
NO03G05670	-1.0941	4.44605	1.95675e-07	4.157e-05	13.0573	15.661	29.5852	29.365	Carboxypeptidase
NO04G00560	7.53418	-0.222062	6.13181e-11	2.86623e-08	8.02899	6.74447	0	0	Unknown protein
NO04G03370	-1.41349	6.29135	8.68605e-12	4.61326e-09	62.9641	68.4897	189.676	147.301	Unknown protein
NO04G04200	-1.15371	3.8342	6.51542e-08	1.63914e-05	9.70099	10.5317	21.5846	21.6106	Retinol retinaldehyde reductase
NO04G04210	-1.21018	4.97749	3.25373e-07	6.18435e-05	26.0178	21.6554	47.6107	57.9072	Retinol retinaldehyde reductase
NO04G04230	-1.47181	3.77417	7.7741e-07	0.000128139	13.7953	15.6787	32.0985	45.9161	Retinol retinaldehyde reductase
NO06G01070	-1.0401	4.73695	5.78713e-08	1.49527e-05	10.5413	10.3364	22.1016	19.3889	Alpha-( )-fucosyltransferase
NO06G01190	-1.18991	5.82075	3.81135e-08	1.07166e-05	34.3422	28.3713	65.0981	72.3218	Endoglucanase
NO06G04580	12.6535	4.69937	7.64868e-109	7.31213e-105	17.5454	15.7009	0	0	Unknown protein
NO06G04620	10.9441	3.00106	2.96951e-63	7.56714e-60	5.81125	5.843	0	0	Unknown protein
NO06G04680	9.6415	1.72534	7.13506e-33	1.36422e-29	15.0091	16.7457	0	0	Extl3 protein
NO06G04690	7.5978	-0.167856	6.29612e-11	2.86623e-08	5.85076	4.12262	0	0	PIF1 helicase
NO06G04730	7.82025	0.0276056	8.14417e-13	4.86614e-10	9.56801	10.7362	0	0	Unknown protein
NO06G04750	11.247	3.30094	3.29622e-67	1.5756e-63	0.808938	0.92587	0	0	Collagen alpha-1(I) chain
NO08G00010	-1.35567	3.65984	8.54579e-06	0.000859977	3.64268	3.56702	11.2853	6.68297	Unknown protein
NO08G00040	-1.02527	4.93767	2.85242e-07	5.80194e-05	28.761	32.7391	58.8573	61.1107	Cellulase 2
NO08G01230	1.69534	7.66819	5.74096e-12	3.22845e-09	342.964	346.634	122.404	83.5003	Anion exchanger family
NO08G03870	-1.1761	3.53302	3.29918e-07	6.18435e-05	9.21234	9.66645	19.5224	21.3985	Unknown protein
NO08G04140	-1.03088	4.91886	5.64079e-07	9.98628e-05	24.61	26.1709	46.2968	50.6345	8-demethyl-8-alpha-L-rhamnosyl tetracenomycin-C 2'-O-methyltransferase
NO08G04150	-1.49263	4.82637	8.12724e-14	5.54974e-11	26.5527	23.5193	66.5922	67.3823	methyltransferases
NO09G00630	-1.26573	4.48981	8.21422e-10	3.41426e-07	19.2159	17.9686	41.7646	43.9475	Unknown protein
NO09G03810	1.5572	4.24282	3.25515e-13	2.07462e-10	11.2635	11.9016	3.62345	3.88809	Unknown protein
NO09G04130	-1.74199	1.81254	7.54415e-08	1.84928e-05	1.21344	1.58459	4.62113	4.43671	Unknown protein
NO10G00380	-1.27559	4.66473	2.15711e-08	6.65224e-06	103.73	80.8782	227.233	188.712	Unknown protein
NO12G00960	1.61391	1.80563	1.11161e-06	0.000174213	6.42684	5.95906	2.39818	1.57729	EGF domain-specific O-linked N-acetylglucosamine transferase
NO12G00970	4.296	-0.250976	2.84975e-08	8.51362e-06	2.47569	2.16489	0.201685	0	Alpha/beta hydrolase
NO12G03350	1.11569	4.50524	5.52682e-08	1.46768e-05	26.8188	29.1049	12.0769	12.7346	Unknown protein
NO13G00250	-1.02	5.27426	1.78776e-06	0.000247695	7.18547	9.3136	16.6323	15.7144	Zn(2)-C6 fungal-type DNA-binding domain protein
NO13G01090	2.80522	4.13852	1.01322e-32	1.6144e-29	49.8503	48.9107	6.30496	7.19943	Unknown protein
NO13G03160	4.74083	0.118431	1.33392e-08	4.72308e-06	1.85461	0.970833	0.091119	0	Unknown protein
NO13G03170	2.415	0.405608	1.88246e-06	0.00025709	2.99809	3.08033	0.808301	0.269899	Unknown protein
NO13G03210	1.12016	4.7937	8.40396e-08	2.00855e-05	226.048	231.499	89.4009	106.868	Unknown protein
NO13G03220	1.10078	6.60163	1.61772e-07	3.51486e-05	103.385	106.115	43.3392	50.4379	Zn(2)-C6 fungal-type DNA-binding domain protein
NO13G03450	-1.30466	5.81678	1.91931e-08	6.32712e-06	23.8944	20.9235	47.2176	58.7218	Beta--mannosyl-glycoprotein beta--n-acetylglucosaminyltransferase
NO13G03460	-1.42606	5.28552	8.76684e-11	3.80959e-08	6.69944	6.7006	15.8056	18.7071	Unknown protein
NO14G00440	-3.0295	2.14211	1.94334e-15	1.54819e-12	0.943681	0.489573	5.25821	5.8877	Unknown protein
NO15G01030	-1.33287	4.58977	1.2303e-06	0.000186693	8.12821	7.91038	16.1893	22.5747	alpha-1,2-Mannosidase
NO16G00140	-1.16992	4.10402	1.17112e-07	2.6657e-05	8.38654	9.98671	21.6328	18.2562	Tyramine beta-hydroxylase
NO17G00220	1.10762	9.774	1.56988e-06	0.000224001	858.334	783.376	424.426	313.653	Major intrinsic protein
NO17G02510	1.34366	6.25576	1.26193e-06	0.000188501	113.521	104.016	33.2009	48.6994	Methyltransferase type 11
NO17G02930	-1.16894	11.5165	1.52118e-08	5.19375e-06	661.899	627.585	1378.5	1419.37	Unknown protein
NO18G00100	-2.40018	2.89023	6.14954e-15	4.52228e-12	0.874561	0.702674	3.65684	4.46347	Unknown protein
NO18G00150	-1.50765	1.67072	8.11106e-06	0.000842844	0.349964	0.443936	1.0536	1.13654	Unknown protein
NO18G00190	-3.27064	0.494551	4.43761e-07	8.00444e-05	0.453001	0	2.01487	2.4139	Unknown protein
NO18G00260	-2.03192	6.37429	1.72754e-22	2.35933e-19	10.4044	8.99312	37.3196	39.2097	Unknown protein
NO18G00270	-2.05833	6.25604	2.07985e-16	1.98834e-13	77.1885	58.3672	244.051	292.569	Unknown protein
NO18G00300	2.81065	3.22685	1.15728e-18	1.22929e-15	6.06985	5.00516	0.59554	0.915374	Mannosyl-glycoprotein endo-beta-N-acetylglucosaminidase
NO18G01270	-1.17682	4.25063	1.49101e-06	0.000219293	27.6489	19.7941	52.7079	49.7698	SNARE associated Golgi protein
NO18G02490	4.67721	4.11395	3.16617e-63	7.56714e-60	53.7413	49.8212	2.06893	1.79122	Unknown protein
NO19G00080	-1.09862	5.38273	4.03623e-06	0.000483607	40.7711	30.1352	69.1619	76.2927	Unknown protein
NO20G00760	-1.23694	3.38182	6.84065e-06	0.000726629	6.30182	6.60207	12.6262	16.4509	Phosphoglycerate mutase
NO20G01770	-1.13012	2.94507	2.50774e-06	0.000332972	2.49242	2.8564	5.81732	5.4981	Plasma membrane intrinsic protein
NO21G00170	2.59265	1.73254	3.74668e-11	1.88517e-08	4.03829	4.95237	0.941469	0.484368	Unknown protein
NO23G01510	-1.02505	4.76181	3.8822e-06	0.000475819	12.431	9.59916	22.156	21.1639	spermidine hydroxycinnamoyl transferase
NO26G01560	-1.42723	3.8698	5.23016e-08	1.42858e-05	9.21666	8.34045	27.2438	18.5935	Unknown protein
NO27G00220	-1.11552	3.82012	7.33278e-07	0.000124965	9.50294	9.04662	18.3416	20.2581	Unknown protein
NO27G00710	1.21391	3.80186	3.05201e-08	8.84157e-06	24.0327	27.2962	10.9861	10.2648	NAD(P)-linked oxidoreductase superfamily protein
NO27G01230	1.80923	6.49189	6.08094e-19	7.26672e-16	47.3017	44.7727	12.0895	13.2393	Unknown protein
NO27G01660	-1.94786	4.06431	1.045e-15	9.08203e-13	42.3164	37.6382	161.405	126.744	Unknown protein
NO27G01700	-1.0393	5.88082	1.19766e-08	4.40369e-06	48.5726	50.0908	98.1201	96.606	Endoglucanase
NO28G00650	1.147	3.54652	3.14643e-07	6.18435e-05	15.0773	13.3178	6.54	5.81099	Unknown protein
NO30G00150	-1.51473	3.05206	1.99156e-08	6.34645e-06	1.98719	1.54869	4.62801	5.11623	Collagen alpha-1(I) chain
NO30G01280	-1.58932	2.60717	8.93304e-10	3.55833e-07	1.62109	1.71825	5.0515	4.67056	Unknown protein

## Sheet: nopac4-2 vs WT
Gene	logFC	logCPM	PValue	FDR	nopac4-2_REP1	nopac4-2_REP2	WT_REP1	WT_REP2	Gene description
NO04G03370	-1.01515	6.41597	2.02243e-06	0.000879205	89.2677	81.8664	189.676	147.301	Unknown protein
NO06G04580	10.996	3.08882	2.03143e-56	1.94286e-52	4.98618	5.73353	0	0	Unknown protein
NO06G04620	8.83439	0.978331	1.92692e-21	4.60727e-18	1.49402	1.25437	0	0	Unknown protein
NO06G04680	7.33334	-0.373459	1.44117e-09	1.53148e-06	2.78471	3.65126	0	0	Extl3 protein
NO06G04750	9.60964	1.72319	1.29709e-31	4.13513e-28	0.270151	0.297342	0	0	Collagen alpha-1(I) chain
NO10G00380	-1.13192	4.7136	1.41827e-06	0.000678218	115.08	84.2952	227.233	188.712	Unknown protein
NO10G03480	-8.73018	0.946611	1.40015e-12	1.67388e-09	0	0	6.25072	14.0811	Unknown protein
NO10G03600	-1.14533	9.13383	1.84192e-06	0.000838863	143.019	155.96	305.252	338.199	Unknown protein
NO13G01090	2.11454	3.56101	3.79876e-13	6.05522e-10	35.4882	25.1118	6.30496	7.19943	Unknown protein
NO16G00140	-1.29956	4.07266	5.18092e-09	4.95503e-06	8.34665	8.24901	21.6328	18.2562	Tyramine beta-hydroxylase
NO17G02930	-1.24406	11.4986	4.88183e-07	0.000274646	545.743	665.316	1378.5	1419.37	Unknown protein
NO18G00300	2.31897	2.81209	1.33088e-12	1.67388e-09	4.31742	3.50901	0.59554	0.915374	Mannosyl-glycoprotein endo-beta-N-acetylglucosaminidase
NO18G02490	4.15607	3.61914	4.59798e-46	2.19875e-42	36.9015	34.3527	2.06893	1.79122	Unknown protein
NO20G01440	-1.3106	3.93882	1.89601e-08	1.6485e-05	2.62258	2.88305	6.53956	6.78113	Zinc metalloproteinase-disintegrin-like brevilysin H2b
NO20G01770	-1.38316	2.88169	8.09837e-07	0.000430293	2.60961	1.84476	5.81732	5.4981	Plasma membrane intrinsic protein
NO21G00170	2.1062	1.33774	3.19818e-07	0.000191171	2.91277	3.43322	0.941469	0.484368	Unknown protein
NO23G01510	-1.04488	4.76117	2.5129e-07	0.000160223	10.6809	10.8423	22.156	21.1639	spermidine hydroxycinnamoyl transferase
NO26G01260	-1.51323	3.00034	9.70606e-08	7.14067e-05	2.14125	2.23038	7.14448	5.08605	Heterogeneous nuclear
NO26G01560	-1.45848	3.86851	2.36584e-07	0.000160223	9.66109	7.39566	27.2438	18.5935	Unknown protein
NO27G01230	1.12936	5.99823	6.90243e-08	5.50124e-05	29.4831	27.4908	12.0895	13.2393	Unknown protein
NO27G01660	-2.75001	3.94191	1.81131e-13	3.46467e-10	15.3446	28.6711	161.405	126.744	Unknown protein
NO30G01280	-1.28465	2.69651	1.05846e-06	0.000532796	2.09203	1.99511	5.0515	4.67056	Unknown protein
